# Supplementary material for: Fishnet simplifies and accelerates signal-to-sequence alignment in Nanopore sequencing
Source: Research Square preprint supplement (doi:10.21203/rs.3.rs-8345719/v1), 2026-01-16
Supplement: Supplementary file 1 [file 9b5bac61a4f98bba5b26901d.xlsx]

## Sheet: Query summary
comparison	mean	p5	median	p95	min	max
fishnet vs remora	1.28801e-06	2.12506e-07	6.89392e-07	2.16771e-06	0	0.00130818
fishnet vs f5c	0.000909587	8.82461e-05	0.00013386	0.000608069	8.05833e-05	0.392964
fishnet vs uncalled4	0.000155027	9.35701e-05	0.00013741	0.000248472	8.50942e-05	0.0202995
remora vs f5c	0.000909592	8.82405e-05	0.000133827	0.000608115	8.09009e-05	0.392972
remora vs uncalled4	0.000155027	9.35618e-05	0.0001374	0.000248494	8.51574e-05	0.0203034
f5c vs uncalled4	0.000731699	1.04667e-05	1.75661e-05	0.00035179	4.77715e-06	0.184193

## Sheet: reference summary
comparison	mean	p5	median	p95	min	max
fishnet vs remora	9.3958e-07	2.19151e-07	2.02107e-06	7.004e-07	0	0.00166889

## Sheet: Comparisons query alignment
read_id	tool1	tool2	norm_mean_diff	normalized_max_diff	pct_identical_boundaries
00002f45-5b4d-4b65-8caf-50155965e3d5	f5c	uncalled4	2.00137e-05	0.00106816	0.780371
00008400-7a12-4ebd-8486-88f6857c560e	f5c	uncalled4	9.14483e-06	0.000644535	0.787282
0002c0dc-a0ca-49b3-b716-74af70ba21ea	f5c	uncalled4	1.25834e-05	0.0013151	0.788235
0003f68c-1572-46b5-af5b-c186bb0482ed	f5c	uncalled4	1.5424e-05	0.00376597	0.781139
000403ed-b627-44c0-968d-738e6cb88831	f5c	uncalled4
00051d69-f5e5-4c7c-a1a7-329ae643318f	f5c	uncalled4	2.05219e-05	0.00119979	0.769523
000541b8-8cb9-4f34-89a3-ccc368514efd	f5c	uncalled4	3.34717e-05	0.00301974	0.780787
00056d3f-efd2-4a10-95c5-359eef2edbc4	f5c	uncalled4	0.000123468	0.0159992	0.780443
00069494-b7cb-40a9-9b35-40114ad68c0f	f5c	uncalled4	1.86253e-05	0.00251542	0.769215
00077e2a-1fbc-4ffe-9b41-b8d7599c8ef9	f5c	uncalled4	4.91194e-05	0.00615084	0.723065
0009b2ab-d794-474b-b48e-e40f5a83baea	f5c	uncalled4	1.50646e-05	0.0019244	0.785484
0009fce2-9dbe-4fbf-9f67-10785d269d6c	f5c	uncalled4	1.17024e-05	0.00270549	0.781991
000a6cc4-1827-4c63-931a-704c8a52aade	f5c	uncalled4	1.80829e-05	0.00116578	0.807474
000a7bc7-edc7-48b1-8bf7-7ff662dec7b1	f5c	uncalled4	1.64453e-05	0.00114065	0.763
000b0461-a4bd-4025-94e7-fd57eab179b6	f5c	uncalled4	1.49446e-05	0.00152427	0.764553
000b7ed0-3927-46e5-a11f-797a32d19668	f5c	uncalled4	1.18614e-05	0.00590849	0.793432
000d66b5-4a2f-4856-99f1-c817d98435a6	f5c	uncalled4	3.33782e-05	0.00877178	0.776433
000d88e9-1941-4c20-9bf6-af8e4fa95f94	f5c	uncalled4	1.09243e-05	0.000591628	0.781634
000deb2e-9de3-4b66-87bd-043d1d0f9b99	f5c	uncalled4	4.72922e-05	0.0202278	0.796643
000f00c1-380d-495e-b7b3-d58af9d387d6	f5c	uncalled4	2.64814e-05	0.00748755	0.76671
000fc389-97ba-488e-b1ea-db4ed062bbfa	f5c	uncalled4	1.15992e-05	0.00260628	0.770148
000fd1ca-4c49-47a7-86fe-ce024c05b808	f5c	uncalled4	3.14441e-05	0.00785406	0.79058
00101443-5f84-46ca-a73f-f6c6a3bcf4f4	f5c	uncalled4	1.38107e-05	0.00385198	0.783146
001028da-15f1-42bf-9423-44d2a9829026	f5c	uncalled4	1.6805e-05	0.00585864	0.780723
00105e68-a65d-4fca-b89e-7fdc98aab958	f5c	uncalled4	2.10346e-05	0.00113609	0.779667
00114243-630e-414a-8347-f6bce1730297	f5c	uncalled4	0.00296449	0.0241819	0.580223
0011ef61-fe50-4c78-970f-0d42885d18a9	f5c	uncalled4	1.3529e-05	0.000963601	0.77352
00121f91-cebf-4db7-9274-e8ed5d31b1ab	f5c	uncalled4
00124129-7d84-438b-a76c-7e6b7b9edc02	f5c	uncalled4	1.09327e-05	0.000681331	0.775716
0012797b-d37c-4fd2-92d2-21d914e03f2e	f5c	uncalled4	1.31743e-05	0.00111735	0.749835
001295f1-2c4d-4af7-90d1-16418699aaf5	f5c	uncalled4	7.96978e-05	0.00615041	0.651113
0012b983-a88e-4bd5-b7be-aa69a67a0e75	f5c	uncalled4	2.46543e-05	0.00458809	0.768698
0012f9d5-ff63-49e3-9260-1ee6bb0c32e9	f5c	uncalled4	1.94808e-05	0.00196509	0.791458
0013029c-3408-40fd-924d-471b6920bd18	f5c	uncalled4	1.2749e-05	0.00123568	0.786098
0013ffb8-e67c-4745-84a9-82e325fd2141	f5c	uncalled4	2.78047e-05	0.0011551	0.763111
0014edff-ec18-47a0-a1ff-a03a1f5398fd	f5c	uncalled4	2.4009e-05	0.00523074	0.772795
00167450-90e6-417b-9c43-8a778e246712	f5c	uncalled4	1.04638e-05	0.000909673	0.856583
0016b3e7-dcc3-4720-ace3-1563ccb67398	f5c	uncalled4	1.30192e-05	0.00292003	0.788016
001803c2-14ca-416e-837a-a86a7d60079d	f5c	uncalled4	1.05616e-05	0.0017163	0.789686
0018c138-2c42-416a-9678-7f1de26f8049	f5c	uncalled4	5.25061e-05	0.0181477	0.783708
0018c2ca-de1e-4c8b-9242-0d4e8ddff751	f5c	uncalled4	4.71529e-05	0.0116098	0.772842
0018ee0d-2267-46bc-9a0b-9bfaa3c22e94	f5c	uncalled4	1.15605e-05	0.000650454	0.766129
001a0913-1490-45c2-be42-157277f37453	f5c	uncalled4	0.000100031	0.00405374	0.573644
001b210a-05dc-4ad4-ba9e-bbd6c3e9e09c	f5c	uncalled4	1.3732e-05	0.00237068	0.792563
001bd20f-2701-4144-8f99-41e559174851	f5c	uncalled4	3.30653e-05	0.00614251	0.788253
001d6662-461e-4d49-9856-070056d3392a	f5c	uncalled4	1.0925e-05	0.00168149	0.777762
001dac9d-51fa-4514-b2cd-2cfac88a788c	f5c	uncalled4	3.29747e-05	0.00581668	0.776614
001daca2-9c61-443c-8e18-0d48af6984e5	f5c	uncalled4	5.22225e-05	0.0116716	0.772413
001e23c2-c464-4da6-805b-02d095d307d9	f5c	uncalled4	1.34265e-05	0.00451667	0.794106
001e5142-fd4c-49e5-8fce-5c7f8373aa34	f5c	uncalled4	2.25704e-05	0.00282841	0.769384
001ea0a3-3b42-4bbc-b562-1e7163054d2e	f5c	uncalled4	2.10508e-05	0.00187223	0.793981
00204705-5c31-458b-a4cb-c282183d3f7e	f5c	uncalled4	1.46942e-05	0.00308222	0.75891
00215f9b-8f6b-4300-93fc-adde0ee3514f	f5c	uncalled4	1.09743e-05	0.00115397	0.778932
0021b69d-e30c-4a53-8202-6fe07a038fa0	f5c	uncalled4	2.19108e-05	0.000899148	0.766691
0021ec21-e9b4-4809-b9fa-12fe7825d505	f5c	uncalled4	1.36976e-05	0.00176719	0.760537
00220ab9-0f6c-40b8-9703-e5ce086c39aa	f5c	uncalled4	1.61018e-05	0.0011157	0.792038
00237182-55f9-4aca-b3b2-ebb387bfba33	f5c	uncalled4	1.67517e-05	0.00394145	0.793379
00237454-d80d-4f15-877e-86bc4b4c6de3	f5c	uncalled4	1.74981e-05	0.00528354	0.781861
00239563-00af-489e-812e-66e50e1c5f97	f5c	uncalled4	1.92922e-05	0.000879443	0.781071
0023973d-4fcf-434c-8196-9592b1246843	f5c	uncalled4	2.83914e-05	0.00451626	0.769293
0023ee60-161b-4714-814b-92a5d99211c4	f5c	uncalled4	0.000109378	0.0107515	0.750923
00255e96-5e68-425b-a1cc-27c2a2872d7d	f5c	uncalled4	1.36149e-05	0.00376472	0.772102
0025b8ee-7ede-4dd2-9db5-4ffa6795c36e	f5c	uncalled4	1.91071e-05	0.000833544	0.796442
0025b9f7-24e3-4134-8192-9c6604bbe1ed	f5c	uncalled4	1.88292e-05	0.00411136	0.754316
0025effa-0142-45fb-8f4a-e786697d42db	f5c	uncalled4	1.40229e-05	0.00266873	0.801725
00266e88-cf47-4896-9a5d-be8c203eca0d	f5c	uncalled4	1.2808e-05	0.00282674	0.781711
00271461-ca96-4f0c-913b-35e0b1a11b5a	f5c	uncalled4	2.22038e-05	0.0033597	0.772953
00273fbd-0a1c-43a0-801f-104d80042fa0	f5c	uncalled4	2.09332e-05	0.00170543	0.771449
00275029-2125-4f6f-814e-d417c43308e4	f5c	uncalled4	2.57668e-05	0.00164504	0.73213
002814b0-a4f5-4b88-851e-7359a42fe48e	f5c	uncalled4	4.04628e-05	0.00501068	0.778927
0029b5b5-3658-4c61-9238-d8a11d8f1853	f5c	uncalled4	1.41623e-05	0.00109703	0.786232
002e9a89-e3dd-44bb-9cb3-db495a4c49f7	f5c	uncalled4	2.89264e-05	0.00398101	0.756229
002ed54f-a74a-459f-a7d7-7bc16a25de4b	f5c	uncalled4	1.20453e-05	0.000933814	0.791486
002f50d3-e0da-4a31-a3be-aa268f647b2a	f5c	uncalled4	1.57635e-05	0.00120562	0.799732
002f55ec-8e72-4066-afab-b3e44ed89eb8	f5c	uncalled4	1.67527e-05	0.00324537	0.782212
0030f4d6-99b2-4867-8b58-9ef10c588b52	f5c	uncalled4	1.22192e-05	0.00212651	0.786909
0031dffa-d125-4535-8fd4-a2225c00ade6	f5c	uncalled4	5.85419e-05	0.00392344	0.700563
0032c4b9-3d04-455c-bd77-fb77455ba906	f5c	uncalled4	0.000139424	0.112612	0.725899
0033055b-cd33-4819-8afc-a9fdc0bd1ca3	f5c	uncalled4	3.73195e-05	0.00559171	0.757214
00340a36-bc73-4bc0-9c7f-379bf7f371d1	f5c	uncalled4	3.32986e-05	0.00971489	0.767003
0034d92f-c06b-4b03-90ae-6329b585df60	f5c	uncalled4	1.48913e-05	0.0038468	0.778812
0034e33e-1553-407f-9e23-d660983bb8e0	f5c	uncalled4	2.0715e-05	0.00132666	0.789578
003564f4-1347-40f9-8ff4-46b2b10ababb	f5c	uncalled4	0.00148929	0.494009	0.709717
003586e4-4a6d-4553-8284-2b53918e718d	f5c	uncalled4	2.2093e-05	0.00342362	0.782156
0035a4df-d8e9-4f33-9635-f5adaed04f80	f5c	uncalled4	2.34456e-05	0.00245834	0.784287
0035b603-26d4-455a-8317-3fd57e324b9f	f5c	uncalled4	2.72016e-05	0.0052079	0.767999
0036cb94-4fa3-4a73-9f9b-3c1abaff7bcd	f5c	uncalled4	2.43005e-05	0.00263782	0.76864
003727c4-f1a2-4233-a646-b0047b94ec76	f5c	uncalled4	2.88685e-05	0.00210342	0.780699
00376cdf-f4a3-4cc1-a298-f9656a4c140a	f5c	uncalled4	2.07925e-05	0.00841567	0.785704
0037e252-5501-4998-be74-77a5ea5bee8f	f5c	uncalled4	8.92379e-06	0.00348681	0.79764
0037e757-a163-48c7-a6d7-1f9f2d54b3d4	f5c	uncalled4			0.731452
0037e818-d7d5-4cc5-a87b-e2fbf661ffd1	f5c	uncalled4	3.36284e-05	0.00918166	0.773699
0037f551-8d7a-4111-b573-0cb189e12d37	f5c	uncalled4	0.0001665	0.134321	0.746897
003891b6-4c4f-4d7b-81a0-ad2ebdadadc5	f5c	uncalled4	8.83575e-06	0.000971401	0.801587
003a1e77-2fbb-4fb4-bea0-a9a58bb70d6e	f5c	uncalled4	1.02934e-05	0.00188903	0.78638
003a7793-c0c8-4633-a46b-98ad7c7fd1fd	f5c	uncalled4	1.67091e-05	0.00840957	0.785706
003b4606-f755-481c-87d0-41c3680901be	f5c	uncalled4	1.48906e-05	0.00100764	0.785247
003cc819-cb8f-4bd2-895b-a4c15e7787ef	f5c	uncalled4	8.68636e-05	0.0188123	0.755975
003d7781-64e0-4a40-8d1b-18d4eaec4e47	f5c	uncalled4	1.91938e-05	0.00524246	0.80347
003d7e6c-16c6-48c3-bc0b-d466440f9e25	f5c	uncalled4	4.61953e-05	0.0108476	0.776273
003dedd8-a679-43da-ab85-0c2d715bc248	f5c	uncalled4	3.288e-05	0.0076064	0.79113
003f4dbe-6e99-4eb8-9048-435d6640353e	f5c	uncalled4	2.24821e-05	0.00095751	0.779175
003f88eb-4d32-4908-8168-029f239b3808	f5c	uncalled4	2.30242e-05	0.00316556	0.759653
003fc146-f436-4b4d-ad9f-d3941c83f298	f5c	uncalled4	0.0760838	0.147088	0
003fd7c5-b107-4e3b-84f5-33a25e2ed7d8	f5c	uncalled4	1.79752e-05	0.00363219	0.763466
00416e19-47a0-4d37-99c5-27f934b9f199	f5c	uncalled4	3.0261e-05	0.0028811	0.741508
00426a52-07db-4d28-831d-463e5ce40fc5	f5c	uncalled4	1.91255e-05	0.00639767	0.79531
004332e3-ca00-49dd-b3b9-1e31a2bdead1	f5c	uncalled4	1.30908e-05	0.00290351	0.790573
004504fc-56a1-4256-af4f-d578f4e8e1dc	f5c	uncalled4	1.60141e-05	0.00141075	0.76723
0046b964-2a95-4d14-a276-6a9898046a62	f5c	uncalled4	2.27329e-05	0.00214889	0.803875
0046c65b-04c0-4436-924e-af10da5aa6a0	f5c	uncalled4	1.21085e-05	0.00101761	0.77346
0046e140-aebd-40f7-a6f3-23813c37ab30	f5c	uncalled4	2.31701e-05	0.00110761	0.79312
004721e9-a663-4465-b8a8-7206c8110c24	f5c	uncalled4	1.61918e-05	0.00228962	0.76723
004738db-6a51-4134-934c-1a1e7297cdda	f5c	uncalled4	1.13833e-05	0.00132576	0.770748
0047b6c9-a932-4000-9bc9-6eef5a0d95e4	f5c	uncalled4	2.66156e-05	0.00217965	0.784183
0047dfa1-69f3-42f7-98a7-61ca5736367a	f5c	uncalled4	1.09207e-05	0.00357982	0.786317
00497e3e-4c27-4ffc-b19f-5fb0a58f8eb8	f5c	uncalled4	1.37472e-05	0.00111257	0.781636
004abc81-193f-44c2-be0e-37f0a647c7f7	f5c	uncalled4	1.72863e-05	0.00137703	0.784258
004b00f7-a436-4765-80ae-15f112b11d5d	f5c	uncalled4	0.0931936	0.191717	0.0282441
004b2eba-8e19-44a8-913b-c8205d15a3b0	f5c	uncalled4	1.46636e-05	0.00433416	0.775229
004b698b-2885-4574-afba-c4be59c63039	f5c	uncalled4	1.76733e-05	0.00199784	0.798859
004e5b82-9fa6-4030-b3e2-5b4817400a03	f5c	uncalled4	1.78239e-05	0.00394143	0.762646
004fa021-fa82-4063-b9cb-eb8224f7166f	f5c	uncalled4	3.12653e-05	0.00254247	0.780988
004fa254-1a0f-4313-b40a-8a19e7f14b90	f5c	uncalled4	2.01738e-05	0.004546	0.79185
00507b55-5075-405b-9ff6-d153820df0f9	f5c	uncalled4	3.91203e-05	0.00195436	0.677291
0050f8de-979a-4f59-a87a-1f6ca8825b24	f5c	uncalled4	1.71483e-05	0.00382952	0.800988
00512b19-ec2a-4463-8a5e-70b225308af0	f5c	uncalled4	4.781e-05	0.0120662	0.747983
005272cc-e3a8-4454-9eb1-b3df1fdddf53	f5c	uncalled4	4.15163e-05	0.0055496	0.716364
0052913a-df47-4783-aed0-526b8a98bc1a	f5c	uncalled4	2.20033e-05	0.00113662	0.81716
00534d88-82e8-4002-bf15-dd9a34625796	f5c	uncalled4	1.10842e-05	0.00308161	0.791473
0053d04f-2266-4809-bbe0-f6ce24e700ad	f5c	uncalled4	1.11599e-05	0.0039724	0.81477
0054590b-6998-44ba-90ee-62f440f4930a	f5c	uncalled4	1.52627e-05	0.00631461	0.784764
005540c4-2e5f-4892-a4b4-f4461cda9938	f5c	uncalled4	2.41326e-05	0.00685754	0.765896
0055ecae-dc2a-4d82-9c2c-eb870ba14edf	f5c	uncalled4	2.02259e-05	0.00106511	0.793716
00566b77-c774-4efc-abaa-ef89070459b6	f5c	uncalled4	2.35416e-05	0.00157275	0.772504
005678a3-cac0-499d-80ec-c927acddd86c	f5c	uncalled4	1.20524e-05	0.000653831	0.796066
0056a21f-f50b-453c-a7b7-fd8b9620fa93	f5c	uncalled4	2.65346e-05	0.00481718	0.798874
0056c13d-c9ec-4129-8004-3403fc27cd1a	f5c	uncalled4	2.7878e-05	0.0021756	0.771097
0056d863-1e8c-4193-ab8d-3f7fff220755	f5c	uncalled4	1.19862e-05	0.00243994	0.775301
00571181-d58f-46cc-907a-5eb85c06a792	f5c	uncalled4	4.84026e-05	0.00857644	0.762837
00577ee9-f973-480c-b067-35e4d30ff51a	f5c	uncalled4	1.97498e-05	0.00118081	0.768307
005a1d42-544f-413a-bd0c-8793ab1a9593	f5c	uncalled4	1.4433e-05	0.00525452	0.779517
005ba4de-c446-4096-9401-a110229a85a8	f5c	uncalled4	2.04829e-05	0.0104288	0.789622
005bd512-17b7-428b-bc4a-f33e823ebc05	f5c	uncalled4	1.77774e-05	0.00163531	0.788032
005bdbaa-db91-4d1d-a5de-0683648b1fcb	f5c	uncalled4	2.28376e-05	0.00554098	0.776761
005be4c2-4ac1-4f3b-9c2f-b6a16c2af5af	f5c	uncalled4	2.40558e-05	0.00153562	0.744741
005c2d83-c0da-417a-8281-d70a9507640e	f5c	uncalled4	1.20866e-05	0.000692207	0.78853
005c6877-8764-4fa7-b11b-5d93f63d2b53	f5c	uncalled4	1.37448e-05	0.0021913	0.785539
005d7665-923a-4916-b367-68c7de65b22c	f5c	uncalled4	0.0298918	0.105603	0.24609
005e3f5d-b366-4ae6-978c-0a175021de15	f5c	uncalled4	1.17876e-05	0.000937672	0.798859
005f8230-e89a-40a4-b30a-4458442d33bc	f5c	uncalled4	2.23805e-05	0.00475839	0.771675
0060fa5e-70d3-4bea-8eec-a6cfc9933a59	f5c	uncalled4	1.73676e-05	0.00365843	0.776809
00635361-1ee7-4536-84ee-fc16d116cb09	f5c	uncalled4	2.06711e-05	0.00374676	0.812037
006500da-afa9-4bb8-bb9d-02e5e7658223	f5c	uncalled4	2.98477e-05	0.00527579	0.770281
0067229c-92b4-4dcc-b7e4-479597dc2582	f5c	uncalled4	1.16923e-05	0.00114498	0.781775
0067315d-583e-4329-ae64-03c0aec3031e	f5c	uncalled4	1.28163e-05	0.00112096	0.775282
0068272c-8ed7-45dd-91d7-08ea65b02012	f5c	uncalled4	1.02833e-05	0.00171787	0.795983
00683caf-9cc8-4e16-817a-8e81d358f29c	f5c	uncalled4	2.36517e-05	0.00126301	0.787453
00685cf5-4369-4dad-ba7d-50f6adb556e6	f5c	uncalled4	2.75095e-05	0.00213381	0.767484
00685e97-5570-4acd-b879-fbf3337ee857	f5c	uncalled4	1.0212e-05	0.00064465	0.782569
006adecb-9f7c-4726-bc38-c0426cb5cd45	f5c	uncalled4	2.95315e-05	0.00661857	0.787813
006b2866-49ec-4c96-bccc-23d9555e7e3b	f5c	uncalled4	1.92695e-05	0.00652332	0.724944
006b5e60-e6b5-4976-a0ee-e35953aac525	f5c	uncalled4	1.47079e-05	0.000891712	0.790256
006bbbe7-aa6c-49b3-b877-709c336eac26	f5c	uncalled4	0.0104348	0.0260749	0.272186
006d007f-9f76-4d44-ad43-923ed5b29137	f5c	uncalled4	1.07643e-05	0.000790743	0.792042
00708f2f-5039-4d12-88db-fadadf15a472	f5c	uncalled4	1.40812e-05	0.000496325	0.723565
007149b7-f7a5-423a-bfa3-3d382ca8dc83	f5c	uncalled4	1.64079e-05	0.00127267	0.784566
00716e08-6702-4df5-8119-1318b7edbe3e	f5c	uncalled4	1.89202e-05	0.00362211	0.783297
00729a06-efb9-4c8e-a14d-449deb177428	f5c	uncalled4
007317bf-75d4-49d9-bc25-4c9e442fe06a	f5c	uncalled4	8.43127e-06	0.00255853	0.82835
00735bc0-852c-4b74-aba3-0aa077e36027	f5c	uncalled4			0.645339
0073c544-5871-4a0e-b0eb-797d9c6a87f5	f5c	uncalled4	1.13976e-05	0.0044576	0.788625
0073c7d7-cfc8-490e-9247-c69919ec2dc2	f5c	uncalled4	1.273e-05	0.00115504	0.780754
007461d1-03ee-407e-9c33-06f8e0760643	f5c	uncalled4	1.30646e-05	0.00112196	0.790342
00746618-eba1-425e-89b4-aeb3e47ac9e2	f5c	uncalled4	1.07721e-05	0.00100524	0.79911
0075a732-dd00-43ec-89ae-8f07e2a0b91d	f5c	uncalled4	0.00965541	0.0571076	0.466433
0075d06e-5e24-4494-80a7-f5a500422e3f	f5c	uncalled4	3.1624e-05	0.00242589	0.775141
00787f9c-f972-4125-b1bd-613ab94b864a	f5c	uncalled4	1.62786e-05	0.000894469	0.764885
007902e4-c5c5-4c09-b1a2-7a22adff440d	f5c	uncalled4	1.08564e-05	0.000865719	0.781979
007b4b72-0c1b-43d2-9d5f-e0bada67aad7	f5c	uncalled4	3.03298e-05	0.00690955	0.744449
007b8e8f-b21d-40f3-af26-969d6c3a4e12	f5c	uncalled4	2.58419e-05	0.00494023	0.78154
007ba8c7-382f-4b53-8f79-c61dd72b5a11	f5c	uncalled4	2.7801e-05	0.00128495	0.736886
007bd957-d9ee-46ae-a615-cb8a5416e8d4	f5c	uncalled4	1.81628e-05	0.00301989	0.755856
007d33d4-924c-499e-a40c-502302bd8c60	f5c	uncalled4	2.38667e-05	0.00126184	0.802534
007d7b27-8dab-4030-93d7-2be87c26432b	f5c	uncalled4	2.29744e-05	0.005471	0.784893
007d998b-6bef-4a4f-99cc-1f065134aeda	f5c	uncalled4	1.36388e-05	0.0006315	0.793637
007da452-9a5a-43c1-8abf-fcecbf749264	f5c	uncalled4	2.07614e-05	0.00256355	0.790466
007e0b95-c938-4a1e-b37a-7a1312dfdd9a	f5c	uncalled4	1.09477e-05	0.00181902	0.792955
007e3bb1-11b2-4445-af11-ccb3c0db3063	f5c	uncalled4	1.27761e-05	0.00229926	0.791858
007e9c84-b88e-4a05-82b1-bbf9348cc69f	f5c	uncalled4	1.41895e-05	0.00148821	0.745262
007eaf7e-62ef-437f-bde5-ac058e411a66	f5c	uncalled4	2.4218e-05	0.00233993	0.784428
007f5b4d-6ebe-4f25-afbb-0fcd03b7cc82	f5c	uncalled4	1.18371e-05	0.00202416	0.795878
007f7e24-bc50-495e-b785-a3470786250a	f5c	uncalled4	1.19786e-05	0.00201669	0.781487
007fb0a1-f862-4d4c-88b7-7442afce0bff	f5c	uncalled4	4.94844e-05	0.00486748	0.71858
008012f5-0686-425a-9e78-bdf913441dd8	f5c	uncalled4	2.0545e-05	0.00276783	0.783387
008158a9-8381-4f64-b5ab-59720695ac89	f5c	uncalled4	2.0792e-05	0.00119323	0.773135
0081efc6-5688-4c16-8e25-9d91f31b2b9c	f5c	uncalled4	1.13937e-05	0.00114587	0.774894
00821080-d1d8-4a6a-9496-1ce2b421ac80	f5c	uncalled4	2.35081e-05	0.00443358	0.773924
0082eb32-6931-467c-810a-81227ea554b3	f5c	uncalled4	1.13857e-05	0.00121457	0.768191
00830220-1ed7-48b0-abf1-ed640bc7d2b6	f5c	uncalled4	0.0516753	0.0998078	0
00830e11-77bb-47d5-9e77-dc7f8fd8a9fb	f5c	uncalled4	1.45483e-05	0.00159525	0.77703
00836a51-2b10-4a97-9365-4c51f5fbe168	f5c	uncalled4	1.42466e-05	0.00138133	0.771577
008475f2-3eae-4a6a-8de9-71c14023a45e	f5c	uncalled4	1.05905e-05	0.000802192	0.781733
0085a970-4a75-4a19-b1aa-af980a293dfa	f5c	uncalled4	2.18659e-05	0.00265002	0.78069
0085c1ec-3332-4e23-85da-7c911455f307	f5c	uncalled4			0.773546
00877c34-0f93-437c-82e8-e0f595783191	f5c	uncalled4	2.29778e-05	0.00845853	0.789496
008935cc-a92e-4aef-bd72-aa49e2ad4a63	f5c	uncalled4	5.40454e-05	0.0023352	0.571033
0089ad48-b7f3-4980-a11c-57982eab6961	f5c	uncalled4	1.87185e-05	0.00226971	0.788794
008a5f0a-2865-4687-8b24-c678caf2c99b	f5c	uncalled4	1.48916e-05	0.00176113	0.776069
008b7f75-e603-4181-9d2d-0d9fee1a33ae	f5c	uncalled4	0.0279708	0.0387024	0
008b86f4-93e2-46e9-954e-2ea8e89c2f2c	f5c	uncalled4	1.01344e-05	0.00065156	0.840626
008be6ff-d40e-4f7e-962c-18ae39ac1637	f5c	uncalled4	1.85555e-05	0.00291631	0.769513
008c7acd-c5f9-44b6-92c6-04972006b5c4	f5c	uncalled4	1.57551e-05	0.00268035	0.77859
008faae4-6612-48c7-bc71-b65115896ad1	f5c	uncalled4	0.000558345	0.202079	0.762335
009006b3-0588-40fe-a1b4-acca3b2baaa3	f5c	uncalled4	1.27585e-05	0.00291834	0.785041
00902ea5-d168-4785-a9a4-ded62bf560db	f5c	uncalled4	9.79497e-06	0.000794721	0.789587
0090bb01-e2fe-4eac-aaad-8b3a04e61b36	f5c	uncalled4	1.27231e-05	0.00139458	0.797958
0090dd49-e671-47dd-93da-e30168a1ea8c	f5c	uncalled4	1.76975e-05	0.00443552	0.787201
00927ef3-93da-43b5-86e1-b1c95238c2a4	f5c	uncalled4	6.65863e-05	0.00613019	0.765885
00937599-d8a4-43d3-bff9-8def5d7b19ff	f5c	uncalled4	1.60284e-05	0.00138495	0.783824
00944c23-022a-4086-a6fa-73ddef3bc4d8	f5c	uncalled4	0.000445172	0.173451	0.7474
00946a26-4468-4303-8e45-9a39fbf4e04f	f5c	uncalled4	1.2189e-05	0.000535756	0.771326
0094d1a6-180a-4f8a-9676-f8cbd5c91f05	f5c	uncalled4	1.20487e-05	0.00173755	0.799201
00955389-104d-4175-b82d-7c80407424b1	f5c	uncalled4	2.92004e-05	0.00231527	0.788408
00958d38-79c5-4c44-b02f-a35363dcad83	f5c	uncalled4	1.88309e-05	0.00182035	0.735434
009694fd-8db0-4ab4-a5bf-7ef2b5a879cb	f5c	uncalled4	1.46319e-05	0.00159566	0.773757
00970670-4331-4d36-a979-3b70901b428a	f5c	uncalled4	1.97924e-05	0.00105206	0.773367
00980636-abcd-46e8-81a1-8cabd48d1b82	f5c	uncalled4	9.96192e-06	0.00229232	0.788643
00985ece-8807-4132-9eb3-bea1369c60ae	f5c	uncalled4	0.00109524	0.0196055	0.544674
009878b4-f3f0-490a-9e2d-a16bd251fb1e	f5c	uncalled4	2.8518e-05	0.00350375	0.782566
0098963a-276b-4840-980a-6df4ee6b50ab	f5c	uncalled4	2.97049e-05	0.00343493	0.778963
00996858-2975-4b05-b920-f9b1ff7a4921	f5c	uncalled4	1.502e-05	0.00530047	0.773209
009970de-418f-43ec-957a-a2f521328cf3	f5c	uncalled4	1.10043e-05	0.000939626	0.780039
0099b910-315a-46a3-acd7-9fcfb4f546b5	f5c	uncalled4	3.04843e-05	0.00501621	0.770637
009a2402-d7c0-4fb4-8e50-b3873da76799	f5c	uncalled4	1.22022e-05	0.00102426	0.772818
009a4116-43b9-46af-af88-35f5f32d9671	f5c	uncalled4	2.9871e-05	0.00771867	0.768786
009a7675-714a-486a-a246-1ba5caa77db1	f5c	uncalled4	5.79767e-05	0.00728144	0.783232
009ad0d0-09c1-4a65-9124-e174a8e42e24	f5c	uncalled4	4.5007e-05	0.00520485	0.721203
009c4956-e35a-4d88-ac92-0a4ae4813365	f5c	uncalled4	1.41072e-05	0.00182351	0.785006
009cb712-3039-4aea-93a7-13a1bc5958cf	f5c	uncalled4	1.91015e-05	0.00318164	0.782549
009da25c-1c6d-4c1b-b214-c0fac9fb0efe	f5c	uncalled4	1.88568e-05	0.00142691	0.711917
009e9e4a-208a-431a-8ec5-c30216a9a010	f5c	uncalled4	1.76395e-05	0.00348906	0.769833
009f3b62-1e6b-4e00-a595-b4a5e9372006	f5c	uncalled4	1.92357e-05	0.00320333	0.771908
009ff10c-e97d-488d-b0c1-3184cdda26d6	f5c	uncalled4	1.59434e-05	0.00442178	0.784222
00a00deb-f756-4603-9883-13be5b6dd904	f5c	uncalled4	1.83786e-05	0.00337908	0.764644
00a01bb5-9f88-4a0f-90c9-4649360f41f6	f5c	uncalled4	2.45106e-05	0.00258782	0.771927
00a1032b-0dde-4f39-bbeb-41dc5f0e3951	f5c	uncalled4	0.00155526	0.368297	0.595296
00a112a0-93bd-43c2-8437-ad2c05c5ec5d	f5c	uncalled4	1.65278e-05	0.00125835	0.782965
00a1575e-5641-4960-bd62-b0c01a2dc4b2	f5c	uncalled4	1.11012e-05	0.00201169	0.781351
00a175ff-51ea-418d-831c-c7c2ccb90e18	f5c	uncalled4	1.42679e-05	0.00522907	0.777043
00a191c9-b1d6-480d-b4f4-8deb7f77c728	f5c	uncalled4
00a1998c-2992-4ad2-b98a-5fc1e93298fe	f5c	uncalled4	1.36769e-05	0.00410776	0.778108
00a1f340-d030-4cda-b1af-9544bf543fb4	f5c	uncalled4	0.000495384	0.212192	0.747189
00a210c2-3969-4140-a53e-3483f19ce035	f5c	uncalled4	2.54043e-05	0.00103879	0.786548
00a25de4-1565-4571-acd9-822cce06070d	f5c	uncalled4	1.66699e-05	0.0023203	0.743557
00a2860f-9765-4ac0-8a26-853b09f9b437	f5c	uncalled4	1.74185e-05	0.00161427	0.777842
00a3b128-a19d-43ea-908d-b54e868f6f91	f5c	uncalled4	1.62589e-05	0.000775512	0.793422
00a4439a-2ade-41a6-ab6c-345980249202	f5c	uncalled4	2.35653e-05	0.00509083	0.745837
00a84834-7f4d-4d67-82f9-16bbd84a1d01	f5c	uncalled4	1.76172e-05	0.0106236	0.810312
00a84a3c-ad78-4d7e-8f6f-9d7440aa7904	f5c	uncalled4	1.16763e-05	0.00182439	0.783469
00a9cc2c-0ebd-4d6e-8170-f3728cdee9f2	f5c	uncalled4	3.06922e-05	0.00191935	0.766417
00aa6508-0954-4201-8ea2-0295529f2e86	f5c	uncalled4	2.7518e-05	0.00411065	0.781736
00aa903f-5abc-4d1b-a168-ef91b32a80fe	f5c	uncalled4	1.16056e-05	0.00511548	0.78372
00aa963e-53c7-4b79-b13e-a735b14c1719	f5c	uncalled4	1.34055e-05	0.00244179	0.797669
00aab6fb-4ffa-4d69-a3e9-4a2812a6ca22	f5c	uncalled4	1.58448e-05	0.00686439	0.784751
00aae0fc-bf0d-437b-bd13-1283abfbb9bb	f5c	uncalled4	1.15359e-05	0.000989257	0.779014
00ac0be1-dfd6-4d13-9ce8-6ef0a9a46c54	f5c	uncalled4	1.77303e-05	0.00342881	0.760793
00ac2904-92a8-4299-ab97-ea066420c975	f5c	uncalled4	2.96784e-05	0.0042794	0.747035
00ac3538-ae91-4348-8fb9-48b490bd323f	f5c	uncalled4	1.34336e-05	0.00117304	0.78084
00ac7464-5c34-4cb1-bb2c-4d70e6bb60c4	f5c	uncalled4	2.24938e-05	0.00396536	0.773032
00adde2e-de55-46e2-add0-b5279cd17c3b	f5c	uncalled4	3.41138e-05	0.00599315	0.78274
00adf2a3-a8de-471c-b3a0-670a72c0ae78	f5c	uncalled4	1.14023e-05	0.00116933	0.778224
00aeaba5-c231-4eea-b59c-67bd8c1bc16c	f5c	uncalled4	1.443e-05	0.00111767	0.701393
00aec44e-9dea-4cab-aaf7-b9511f3106b7	f5c	uncalled4	2.23056e-05	0.00193162	0.768631
00aed194-778d-4235-a666-d6e854ae1ec7	f5c	uncalled4	2.66543e-05	0.00122473	0.771443
00b0ca53-0345-4be1-9e0d-7f7cb5eea192	f5c	uncalled4	3.17674e-05	0.00363486	0.720016
00b1711b-5c61-4444-889a-6a61ce50b55c	f5c	uncalled4	1.30615e-05	0.00146918	0.774451
00b210b8-ff80-4e22-9d6c-5d0270c5140f	f5c	uncalled4	1.16969e-05	0.0009714	0.788483
00b24f39-148c-441d-94dd-f0b26256fcca	f5c	uncalled4	1.52708e-05	0.002082	0.790462
00b27e02-b903-4479-a59f-6f85a9f9e563	f5c	uncalled4	1.69291e-05	0.00274518	0.765043
00b37dc2-f000-4cd3-8b54-5c35eb71d322	f5c	uncalled4	1.64023e-05	0.00117696	0.770822
00b3904c-ffc0-4d6b-9296-cb24456a8554	f5c	uncalled4	1.14572e-05	0.00224087	0.790988
00b42d77-ba0e-49d0-9337-acec26649fc9	f5c	uncalled4	1.16322e-05	0.00135387	0.782094
00b4825d-566d-427b-8e69-23a9f08b3fa8	f5c	uncalled4	1.71992e-05	0.00170658	0.785874
00b49569-7b0b-4dfa-90d3-647c1bf25ea4	f5c	uncalled4	1.35546e-05	0.00105011	0.743202
00b49a77-e1e6-4707-bdf5-27310d86f743	f5c	uncalled4	2.65593e-05	0.00216532	0.766134
00b5cd3d-fbd2-4494-995f-b7eb8d246af2	f5c	uncalled4	1.29761e-05	0.00292136	0.792924
00b60f6a-9331-4a8c-9e32-f22c5d923d38	f5c	uncalled4	1.16013e-05	0.0015386	0.792212
00b69170-c10a-4d5d-81d5-89084837046a	f5c	uncalled4	2.88732e-05	0.000865857	0.767247
00b6abf2-53d5-4d9a-9ad0-9d745618fcbc	f5c	uncalled4	2.65163e-05	0.00136492	0.766241
00b744a0-3397-486a-b6a4-0b605a38041f	f5c	uncalled4	1.50226e-05	0.000868042	0.77485
00b74d14-92bd-4ba3-a54b-0472f7aacd4a	f5c	uncalled4	1.97606e-05	0.000964309	0.74344
00b8dc06-953f-454c-bf32-75fd62f5648f	f5c	uncalled4	1.01778e-05	0.00108297	0.78566
00bb69c6-78bc-410c-acbf-d64374056067	f5c	uncalled4	2.87615e-05	0.00370274	0.773236
00bb6cdd-d4f6-45c0-b271-91b4ca94ad7f	f5c	uncalled4	9.24717e-06	0.00161143	0.7955
00bba5fe-340d-40f5-9d28-77a31d982171	f5c	uncalled4	1.15116e-05	0.000593742	0.781452
00bc9e95-60b8-4ab6-afa2-d7f52e8b5d5c	f5c	uncalled4	0.00205961	0.210328	0.510421
00bcf82c-6d7e-45dc-b6d7-186c543306a0	f5c	uncalled4	1.09953e-05	0.00163736	0.778865
00bd115b-0fa4-4a27-9a86-32f8ec2cd20d	f5c	uncalled4	0.00676623	0.241559	0.601138
00bffd12-e186-4fd0-ac13-6b9ebf96443d	f5c	uncalled4	2.12176e-05	0.00288643	0.760763
00c04cbb-b5a8-4e44-a601-f71b4d05e647	f5c	uncalled4	2.27155e-05	0.00118924	0.733295
00c1473a-756a-4f8c-8cff-daf14a0a4d57	f5c	uncalled4	1.47653e-05	0.00136452	0.778184
00c41385-8b02-4a2c-82ff-d5080436ad58	f5c	uncalled4	1.59245e-05	0.00128529	0.804154
00c4c027-b4d1-4d64-9055-6281db68d810	f5c	uncalled4
00c5976e-41a9-45c2-b004-a768bda47143	f5c	uncalled4	1.14018e-05	0.00329996	0.780902
00c59e85-c64b-4895-ba8d-16f3a8da7006	f5c	uncalled4	1.24263e-05	0.0037364	0.790765
00c7aa2f-b319-46db-ba51-66b708003b12	f5c	uncalled4	0.000227116	0.0144672	0.742103
00c87b9e-e46a-417e-8f7f-05369237802f	f5c	uncalled4	1.61426e-05	0.00243681	0.790855
00cb5a16-b7dc-4ba6-bd53-5e84e8d1ca7f	f5c	uncalled4	1.36727e-05	0.00088985	0.769163
00cc28b6-702a-4488-87f3-a6a480ab82d8	f5c	uncalled4	3.10422e-05	0.00678401	0.782523
00cd76cd-e007-429c-87c9-ee3700295d29	f5c	uncalled4	1.19898e-05	0.00122761	0.773409
00cde7f0-6a12-4d4a-9939-4dec7951d6cd	f5c	uncalled4	1.27397e-05	0.000687483	0.780494
00ce2271-4850-467b-ba88-914dc1d0efb0	f5c	uncalled4	1.10562e-05	0.00146294	0.802829
00ce402b-a9d9-40c6-b3bd-1ede4b390f7b	f5c	uncalled4	1.23714e-05	0.00111137	0.777069
00ce5f1b-0ae3-4471-a0bb-e23d66838052	f5c	uncalled4	2.06368e-05	0.00227347	0.785127
00cf1bf2-21a6-400b-8d11-e431d7d5ee70	f5c	uncalled4	2.98497e-05	0.00218239	0.768549
00cf348e-2c9f-4315-8cb3-8ca9e76a0226	f5c	uncalled4	0.01283	0.147767	0.60887
00d06e59-ef39-45c6-b43a-7f89a3cd65ea	f5c	uncalled4	2.3869e-05	0.00232139	0.793684
00d09262-74cc-429c-b87e-d877bcab07f1	f5c	uncalled4	1.62544e-05	0.00215242	0.781148
00d09dc2-6bb8-4270-b10f-a7fd21fcb042	f5c	uncalled4	9.98512e-06	0.000884744	0.8006
00d0c76f-d8f8-4d4d-94ac-4e056a2c76b0	f5c	uncalled4	2.70922e-05	0.00512005	0.768178
00d15057-3a02-4e1f-b705-1da30b68251b	f5c	uncalled4	2.08511e-05	0.00482588	0.78397
00d1e36d-71ab-4661-a8b4-911a2b0119ce	f5c	uncalled4	3.54113e-05	0.00670246	0.772627
00d49a6d-e3fb-4463-a97d-787832f55da2	f5c	uncalled4	1.23193e-05	0.00207797	0.782424
00d4ab73-cf96-46e7-bf01-e50dc5d6d0e7	f5c	uncalled4	1.72763e-05	0.011498	0.747096
00d51513-3e69-4399-a11f-acce3e673ee7	f5c	uncalled4	2.15117e-05	0.00252069	0.786148
00d5e135-65b6-4cb3-b487-1631cebade5d	f5c	uncalled4	2.18352e-05	0.00571031	0.775271
00d63f1e-d501-4b43-a70d-0e5c91e8350d	f5c	uncalled4	1.89558e-05	0.00100261	0.799666
00d78aa7-8e44-4f4d-88f9-23bfcc00f651	f5c	uncalled4	1.11964e-05	0.00298703	0.795146
00d79add-5044-4686-b196-ff74474d14bd	f5c	uncalled4	1.46851e-05	0.000774427	0.773843
00d7ac88-5ecd-48fd-88c9-c3a168425756	f5c	uncalled4	1.58124e-05	0.00127035	0.795386
00d7cc3b-3054-4d64-9de3-018539b8c4fa	f5c	uncalled4	0.000495281	0.185841	0.745807
00d9169a-97cd-4821-adba-bb3de697c4cd	f5c	uncalled4	3.92408e-05	0.00881789	0.756048
00d9cb9b-df8a-43e3-9754-d1057d7427d3	f5c	uncalled4	1.41702e-05	0.00142454	0.761843
00d9e29b-2c05-4df1-a3a6-404f6a396974	f5c	uncalled4	1.84882e-05	0.00380876	0.785738
00da1df5-8099-422d-b046-f75378a3b167	f5c	uncalled4	1.27975e-05	0.00157193	0.789099
00db005b-5446-457c-947b-45c50562806e	f5c	uncalled4	1.29148e-05	0.00137938	0.750787
00db7f40-e583-424f-b63c-100973e460a4	f5c	uncalled4	1.03809e-05	0.000576042	0.773691
00dba546-014f-4e62-90cd-5562d45dcc72	f5c	uncalled4	2.94242e-05	0.00588433	0.801093
00dbf6db-123b-4b58-9d06-98cd84386eb0	f5c	uncalled4	0.000899956	0.323646	0.780757
00dd5e55-0ba1-4360-b3c6-5240415081b1	f5c	uncalled4	1.86885e-05	0.00159761	0.782957
00deaa93-3efa-46e4-8a6b-8a66cbc3c21d	f5c	uncalled4	4.82488e-05	0.010591	0.716939
00df4dc9-dccb-4a94-aa00-a4099d9d5631	f5c	uncalled4
00df8779-ecff-4cd4-b5de-a9fcff899b45	f5c	uncalled4	1.20538e-05	0.000796952	0.784706
00e0be27-d991-40a1-9f9c-5bd8175aec62	f5c	uncalled4	0.000649058	0.224032	0.733941
00e24500-2e11-49ab-bc2d-520973b180ea	f5c	uncalled4	1.36902e-05	0.00201284	0.779601
00e297a7-68d4-4a4b-b518-81c5c931468f	f5c	uncalled4	1.45583e-05	0.000769875	0.783169
00e3abe2-a2f1-4175-a703-cfbcdfdccde7	f5c	uncalled4	1.34726e-05	0.00435191	0.767866
00e4787e-4c11-43e3-8b7a-ea21033196c6	f5c	uncalled4	2.65059e-05	0.0055484	0.776239
00e4a6c9-ca7d-4231-86dc-87e19c7b9c8d	f5c	uncalled4	9.24822e-06	0.00239445	0.823494
00e4fc5d-028e-4f4b-9b26-76e21adb26ff	f5c	uncalled4	1.35597e-05	0.00354202	0.784467
00e5be1d-9abd-4432-938c-4660177e3cab	f5c	uncalled4	1.15091e-05	0.00050595	0.773431
00e670cb-216d-495f-bc06-ff8095c90210	f5c	uncalled4	0.00221609	0.0343868	0.538237
00e778fd-cf5c-4fbd-9a41-09fbea266a71	f5c	uncalled4	1.19264e-05	0.000658818	0.777333
00e7c209-2501-4430-82f3-f190eb1ebd3b	f5c	uncalled4	1.41296e-05	0.00115272	0.750601
00e7c555-bf3f-403d-a7b3-58bdcb7c5945	f5c	uncalled4	1.12739e-05	0.00341747	0.790567
00e86cb7-d33e-43c7-a6d6-d1370d4f112f	f5c	uncalled4	2.59856e-05	0.00141382	0.789157
00e8905d-634d-45ca-a021-9eefb16b3574	f5c	uncalled4	5.30127e-05	0.00423669	0.67949
00e8f5ec-a9c1-4594-af32-3ced6d9b69fd	f5c	uncalled4	3.56056e-05	0.00811558	0.777643
00e9004a-5c0d-4815-b691-ef0980b92510	f5c	uncalled4	1.61551e-05	0.0033452	0.771493
00e99b9e-6f34-4f72-bc86-5b3c5f1561f8	f5c	uncalled4	2.62413e-05	0.00204443	0.700686
00e9c9d3-4393-43d7-9463-dd95feccecfa	f5c	uncalled4	8.09704e-05	0.00521876	0.751885
00e9dd27-627d-4671-b170-6bec2ad99a1c	f5c	uncalled4	1.51994e-05	0.00180166	0.774444
00ec1e90-eccd-4a7e-931a-61aeb50b93f1	f5c	uncalled4	1.99567e-05	0.00165981	0.775327
00eca475-94d5-448b-b101-c2cd78ec15c3	f5c	uncalled4	0.000210409	0.154014	0.686217
00ecb814-7c83-454b-9651-3545f78d881f	f5c	uncalled4	2.22993e-05	0.0014883	0.764411
00ed8e91-55a0-4b6a-8cb7-1cc0b4de2c78	f5c	uncalled4	1.35974e-05	0.00286029	0.77911
00ee4f90-b139-4309-8c8e-97509c00ff4a	f5c	uncalled4	3.4399e-05	0.0035115	0.761857
00ee7ae4-49f3-4fe3-8475-db049f203d0d	f5c	uncalled4	3.80077e-05	0.00623671	0.777172
00eee3f8-67c2-4a9b-82d0-1b11c8605c31	f5c	uncalled4	1.06849e-05	0.000562523	0.786504
00eee712-41a2-46dc-a4b4-e9cd080c75c0	f5c	uncalled4	0.118953	0.239912	0
00ef2d8e-6900-4424-889f-f74607a807d4	f5c	uncalled4	8.84468e-06	0.000943167	0.804502
00ef36f3-6a51-44b6-8e91-3511d7a7dadb	f5c	uncalled4	1.77563e-05	0.00273656	0.797902
00ef5283-8159-4cbb-97fc-5618035f3587	f5c	uncalled4	2.62965e-05	0.00202981	0.777668
00f025b2-9746-4082-9509-80e5273e657b	f5c	uncalled4	1.71921e-05	0.00104972	0.775065
00f06621-c1ef-407d-8a8a-0731fbe424ff	f5c	uncalled4	3.64741e-05	0.00936864	0.786291
00f06bf5-bd81-46e7-9043-2cdf378964e2	f5c	uncalled4	2.98789e-05	0.00121438	0.777693
00f0c9f6-d773-4f12-b624-20d7da5ee462	f5c	uncalled4	1.45651e-05	0.000915836	0.772199
00f0e2d6-71a0-4239-b1d1-294e7bf4e54f	f5c	uncalled4	1.21877e-05	0.0015828	0.787682
00f10c18-5f5a-4650-8ad8-65e639ec6cc9	f5c	uncalled4	2.09949e-05	0.00616271	0.799662
00f121de-0280-47cc-8eb2-078b80e5726f	f5c	uncalled4	1.26368e-05	0.0007363	0.766204
00f13039-315f-460d-ba3b-e65818c9a1de	f5c	uncalled4	1.74985e-05	0.0013585	0.739956
00f19e4f-dcfe-453a-9939-a3277577165c	f5c	uncalled4	9.2344e-05	0.0264847	0.769314
00f25cdd-15f4-45a4-90cd-ec0f7c0498a1	f5c	uncalled4	3.03105e-05	0.00440993	0.759728
00f46b4c-90b2-45c8-8852-e4af4ed114c2	f5c	uncalled4	1.01496e-05	0.00075126	0.79123
00f5e456-ba1c-42ab-ba53-e25fb3352dc3	f5c	uncalled4	0.0609543	0.107479	0
00f662a6-92df-4470-9d92-352bab76755d	f5c	uncalled4	1.55052e-05	0.000934372	0.761096
00f71f5a-9f65-420e-948c-e2037245f61d	f5c	uncalled4	1.2789e-05	0.00092564	0.776877
00f7c751-f3dd-49da-9e93-6eca3c109ca2	f5c	uncalled4	1.8316e-05	0.00141722	0.767341
00f7f7cf-fdad-4fdc-b55e-296265288f34	f5c	uncalled4	1.00097e-05	0.00177906	0.797915
00f84b9b-9544-43b7-86e8-641ea2fbc092	f5c	uncalled4	1.18521e-05	0.00197066	0.786664
00f9b3de-0d5b-47df-9a94-07c5c8e93d82	f5c	uncalled4	2.1139e-05	0.00325449	0.766209
00fa672b-dc17-4895-9585-d47c9afee4d7	f5c	uncalled4	0.00120194	0.311524	0.740995
00fb6dae-2070-45db-aadc-a8937af30bee	f5c	uncalled4	1.47518e-05	0.00172984	0.792788
00fb9adc-a111-4505-8e1c-1a386ffd9837	f5c	uncalled4	1.9973e-05	0.0024461	0.785268
00fc0499-f17a-454d-b9c6-94169f0552d4	f5c	uncalled4	1.80647e-05	0.00376278	0.780927
00fc4c1b-816f-4a61-8077-4eadb8598f72	f5c	uncalled4
00fc5d0e-a28a-400b-a195-ec0bd38da0ef	f5c	uncalled4	1.61784e-05	0.00104589	0.785203
00fc6179-cb81-4ffc-b093-2363ed077e79	f5c	uncalled4	9.70512e-06	0.00127589	0.784486
00fc903c-c3c8-4f8e-88e3-299e58e71711	f5c	uncalled4	2.98225e-05	0.00676955	0.764217
00fc9484-d878-4cc2-ad0a-798555d57783	f5c	uncalled4			0.318986
00fed709-d685-4558-894d-21904bef7e8d	f5c	uncalled4	1.68748e-05	0.00365643	0.778494
00ff005d-1042-4f0c-9709-4f00c13e9d94	f5c	uncalled4	2.27707e-05	0.00461133	0.802248
00ff173a-f2ae-43bb-ad6a-084246378aba	f5c	uncalled4	2.91511e-05	0.00206935	0.770759
00ff4fcb-499e-4dbd-b587-1996168ddc9b	f5c	uncalled4	1.37866e-05	0.00118329	0.782158
00fffd1d-a069-4abd-8a82-aa741e2276f9	f5c	uncalled4	3.34309e-05	0.00640663	0.780689
0101459e-cbbb-4828-b82a-d93b91a5b856	f5c	uncalled4	2.81457e-05	0.00141416	0.750199
0101c320-f735-40d3-aecc-b6919ea778f3	f5c	uncalled4	3.42579e-05	0.00299401	0.692228
0101d8ae-da36-4a96-b147-b3de3968b76d	f5c	uncalled4	1.9049e-05	0.00160845	0.771559
01023fb5-5717-4d7e-b4ee-0d47e773457c	f5c	uncalled4	1.54352e-05	0.00119538	0.787126
01039747-ec3e-4b59-ad1f-3bc0810e19d6	f5c	uncalled4	1.70131e-05	0.00743697	0.77532
010467a8-7fa2-4ed7-9ae9-4ec2c1ac0b74	f5c	uncalled4	1.50177e-05	0.00192548	0.788595
0104b774-1037-43df-8e71-6c7ac7ce2840	f5c	uncalled4	1.70824e-05	0.00104569	0.773467
0104fd38-7208-4bbb-a334-c47b3cf7d727	f5c	uncalled4	1.77208e-05	0.00161874	0.771746
0105d92c-e23c-4a4e-a82e-4a9e3f418854	f5c	uncalled4	9.08667e-06	0.000899021	0.791928
0105e6f4-ed54-4128-9fc8-c703ac7eced9	f5c	uncalled4	1.47229e-05	0.00272858	0.774073
0106041a-21fc-4152-9ef8-1546049a5093	f5c	uncalled4	2.71785e-05	0.00135367	0.775169
01069b93-2600-4135-92a3-12a304f982b8	f5c	uncalled4	1.88096e-05	0.00481799	0.805061
0106c772-38e8-43ad-97d8-54ee3131decb	f5c	uncalled4	1.092e-05	0.00140408	0.784523
0106cbec-ecd1-46b7-83be-103411b9daf5	f5c	uncalled4	1.30076e-05	0.00124687	0.777259
0106cce6-7bd2-4f76-a94a-cf0577f32727	f5c	uncalled4	1.54564e-05	0.0053486	0.775876
01072eb8-73d4-43cb-aa52-5e073f6db4db	f5c	uncalled4	1.39535e-05	0.00295184	0.75316
0107692d-5b89-4fd2-9ee1-717eb6cce686	f5c	uncalled4	1.06578e-05	0.000674937	0.790795
0107aad1-4b04-4d23-8400-9c6315a20b3d	f5c	uncalled4	9.95294e-06	0.00107253	0.777845
0108746d-f41c-4185-b46f-9c6da50dace7	f5c	uncalled4	1.99977e-05	0.0019966	0.776237
0108f22b-bfb7-432e-9507-cad7ad0ccb61	f5c	uncalled4	3.27321e-05	0.00317498	0.728153
01097bb1-08cb-4f69-9458-61deaa8fca4b	f5c	uncalled4	1.24029e-05	0.00150958	0.798647
010bff86-8df0-48fa-8726-63d9c36f1be3	f5c	uncalled4	1.11991e-05	0.00302918	0.838605
010d7e44-4d7f-46c9-98a6-da698199e9e9	f5c	uncalled4	7.40222e-06	0.000610593	0.817666
010df94e-8725-4097-917d-3dc455d6550c	f5c	uncalled4	1.17337e-05	0.0025394	0.782984
01123ad8-f049-4000-85ee-a7669783b70a	f5c	uncalled4	1.73451e-05	0.00117666	0.79521
01124b97-163c-45cf-bb42-f2531557cb26	f5c	uncalled4	1.49671e-05	0.00337574	0.779784
0112970e-8ad9-4979-b2cd-e66e1defc4bb	f5c	uncalled4	1.92402e-05	0.00151775	0.800081
011393f8-cdfd-4cb2-86af-c64016686361	f5c	uncalled4	1.66656e-05	0.00110507	0.770815
0114091f-33a9-4c95-88d5-2f805dbf229c	f5c	uncalled4	1.09176e-05	0.00146565	0.785898
01146423-2c50-4e79-ac99-60f9d287db72	f5c	uncalled4	5.64076e-05	0.0052182	0.665863
0115fa5c-dbc2-4465-830c-9a60177d6897	f5c	uncalled4	2.30832e-05	0.00163284	0.776419
01162a29-fb9d-4537-8c36-f0a8ea8e41df	f5c	uncalled4	2.04683e-05	0.000801815	0.786861
011724ec-400f-40af-b2e2-22c593c03da9	f5c	uncalled4	2.44874e-05	0.00365732	0.787236
011770c7-c6b0-4f6e-be90-dddaa30de83e	f5c	uncalled4	1.29036e-05	0.00125726	0.779571
0117d8a0-5a2f-4bcb-ad70-a538311610d8	f5c	uncalled4	0.00187242	0.0157347	0.624687
01183488-c564-4c1d-9ebf-65ea920e2f44	f5c	uncalled4	3.49621e-05	0.00598004	0.769538
01183e83-07aa-4a14-93dd-7e971b952709	f5c	uncalled4	2.55462e-05	0.00215849	0.781383
01186115-9046-428a-a853-ba4fba414489	f5c	uncalled4	1.4662e-05	0.00180638	0.794211
0118faf4-3417-406c-a2ea-ba4f29aa189d	f5c	uncalled4	2.85047e-05	0.00295282	0.769531
01190b91-6ce4-4b63-8f6f-f0f34ba652a8	f5c	uncalled4	1.30399e-05	0.0017732	0.766539
011b372d-73ab-46d6-ba58-d956a2b581f4	f5c	uncalled4	2.34675e-05	0.00199159	0.780951
011bf0cd-8abd-4fd7-96ab-a60a813d8ed7	f5c	uncalled4	2.51864e-05	0.00300947	0.791024
011bfe68-3105-480e-8bc7-8d1045c106d1	f5c	uncalled4	1.21034e-05	0.00131232	0.785985
011e2ffa-9b0c-4215-a2cc-475cfcb37cb2	f5c	uncalled4	1.93291e-05	0.0019596	0.775923
011e886d-fd9c-4013-8a72-0e74f6aca983	f5c	uncalled4	0.00643037	0.0161178	0.334868
011ec380-7070-4073-877e-5470749013f0	f5c	uncalled4	1.4597e-05	0.00425141	0.743013
011ecff6-f60f-4de9-b281-3f0bedd0ff14	f5c	uncalled4	3.51943e-05	0.00826526	0.786386
011f6c29-7e7a-4efa-a958-e8168f424ec5	f5c	uncalled4	1.02467e-05	0.00102687	0.771115
011f806b-81fc-4f76-9e79-95540f040377	f5c	uncalled4	1.00119e-05	0.00140516	0.785056
0120000e-79df-466b-b81d-225d368af42a	f5c	uncalled4	4.26627e-05	0.0116115	0.779357
0120a084-ef48-465c-bd72-8aab81c83163	f5c	uncalled4	1.21069e-05	0.00121686	0.77677
01218a39-bf4f-468b-a59d-09b369b5c456	f5c	uncalled4	1.72717e-05	0.00246726	0.773483
0121e2e0-7769-45e7-bfa3-9cd5abd326ed	f5c	uncalled4	1.00498e-05	0.000739736	0.784381
01227825-8892-4199-b9b4-d40bbcc25ddf	f5c	uncalled4	1.70037e-05	0.0147272	0.770309
0122da72-a8a5-4b6b-ab7e-38d6e8b59d09	f5c	uncalled4	2.11882e-05	0.00166636	0.760346
0123093c-1096-446c-996d-695ed57920dc	f5c	uncalled4	0.00132522	0.256577	0.709698
0123e190-bde0-497f-a80b-10d294c3a5fe	f5c	uncalled4	4.53928e-05	0.0123347	0.779945
01244c7c-0c8f-416f-9ec4-c0a6fd05a844	f5c	uncalled4	0.0161626	0.24439	0.530256
01248c48-5738-47e7-80d4-c401bedc9790	f5c	uncalled4	3.10751e-05	0.00119884	0.762342
0125ae7b-27eb-47ad-84ce-c00e2db3d3d1	f5c	uncalled4	2.24084e-05	0.00138015	0.813184
0125b6d8-83de-49b8-89c3-ba01319932e2	f5c	uncalled4	1.52924e-05	0.00226896	0.776298
0125f929-2181-44ad-b531-cab2d0148f64	f5c	uncalled4	1.5716e-05	0.00230676	0.744083
01271cbe-981f-40c0-a7a6-bb6de4537df5	f5c	uncalled4	5.88875e-05	0.0149025	0.781906
0127d922-9545-4bb6-ae82-1eda149eb665	f5c	uncalled4	1.905e-05	0.00190349	0.789945
0127f4e9-91bf-4bc0-a84b-429d3b79dfac	f5c	uncalled4	1.48251e-05	0.00224683	0.772929
0127f58e-bece-4875-8748-2b27e5820f3a	f5c	uncalled4	1.81625e-05	0.00361774	0.75879
012900fd-91de-4cb3-969d-651057c6414e	f5c	uncalled4	2.15804e-05	0.0014892	0.791834
012a4cbb-3307-462c-8f93-cbe45b4eb79f	f5c	uncalled4	1.29474e-05	0.00097926	0.784344
012a8628-3e60-4d37-982a-cd40b6293745	f5c	uncalled4	2.45448e-05	0.00423536	0.76787
012bcb85-3112-4a4d-be80-833ec4ba510a	f5c	uncalled4
012c53cd-f40d-4474-93f1-f91791552cc4	f5c	uncalled4	1.68866e-05	0.00159457	0.711197
012ce04c-2b35-4500-844d-907ea69845b3	f5c	uncalled4	1.27236e-05	0.00149367	0.784315
012d897d-bef3-452a-9183-b1c1e1bbf582	f5c	uncalled4	2.4194e-05	0.00135909	0.779126
012e4ee4-c025-4432-8d48-4609047dbe1d	f5c	uncalled4	1.20399e-05	0.00125143	0.793845
012e7fdc-dd4a-4470-9aa4-62c751a82cd8	f5c	uncalled4	2.03393e-05	0.00254708	0.789907
012eb643-b248-49ac-b9f3-b08ddeed3b3b	f5c	uncalled4	1.43975e-05	0.00112562	0.771182
012f432d-18d7-46e4-9f5e-c730d50c9271	f5c	uncalled4	2.50889e-05	0.00125173	0.765066
01301d0a-3798-47d4-a522-65e98e4094c8	f5c	uncalled4	1.83815e-05	0.00585914	0.782473
01307c07-9499-4aeb-842c-aa9508f6f3c4	f5c	uncalled4	1.35621e-05	0.00446851	0.780817
0130bd11-4168-4131-bf5f-250bc6c7d531	f5c	uncalled4	2.29044e-05	0.00336457	0.815932
0130f287-9aa4-45bd-95ae-731cd67c8fe6	f5c	uncalled4	2.87423e-05	0.00462491	0.773084
01321f86-f3fb-4584-886f-6c5f18e27a2d	f5c	uncalled4	0.0367579	0.0703802	0
0132441e-fc4d-4934-b2ac-316b6c1756f5	f5c	uncalled4	1.13596e-05	0.00224235	0.78203
0132f0b8-6e85-4ced-a998-54fc184dc090	f5c	uncalled4	1.4759e-05	0.00199804	0.767322
01336ffe-661b-41b7-8a76-33bf9feecf1c	f5c	uncalled4	3.10312e-05	0.00530301	0.777559
01350559-dfbe-4da9-bc69-6610da81f0d4	f5c	uncalled4	1.47733e-05	0.00423245	0.794349
01352bd1-4001-41dd-abe2-781b659220ed	f5c	uncalled4	2.22735e-05	0.00593936	0.771693
01353ef5-0585-47b7-be4e-c60b9317de3a	f5c	uncalled4	8.16957e-05	0.00200527	0.627863
013552c2-f66d-4704-ae13-8ff9638d192a	f5c	uncalled4	2.44282e-05	0.00638934	0.745873
01358b13-0b9f-4087-8f4c-a77d42a62bc8	f5c	uncalled4	9.57647e-06	0.00191713	0.789707
01375d00-c12f-4655-aaa8-77af1b4dd5ec	f5c	uncalled4	2.44375e-05	0.00321129	0.772084
013886e1-0e47-4c18-98f8-6fbfe0b14dd5	f5c	uncalled4	1.74806e-05	0.0015795	0.774242
01392cd9-c9f9-48c4-ad7c-571942c67984	f5c	uncalled4	1.38357e-05	0.00286676	0.782222
0139501d-1626-4688-9775-7d2d5cddcf87	f5c	uncalled4	1.93912e-05	0.00191426	0.792289
0139a6ba-d311-403c-ae84-308fc20ba232	f5c	uncalled4	1.138e-05	0.00119899	0.76872
013ab60a-48a1-498c-9665-1653f1258b58	f5c	uncalled4	1.91469e-05	0.000824142	0.756481
013b3648-c282-4e26-a3dd-c05b97be3e27	f5c	uncalled4	2.73802e-05	0.00128989	0.786798
013b7dde-95b1-4feb-80f8-dd907001493b	f5c	uncalled4	2.69938e-05	0.00189698	0.771524
013d1bb1-1afa-47d5-8894-95fe256128d7	f5c	uncalled4	9.09914e-06	0.000746377	0.795363
013d763c-00d8-44a2-8c2a-7ed44ecb36f8	f5c	uncalled4	1.63532e-05	0.00100196	0.791536
013dcaed-0585-4e1c-af2c-d1643d417a3c	f5c	uncalled4	0.00180316	0.0235251	0.658096
013dfd77-6d4d-4c0c-981f-8f6093c3ab09	f5c	uncalled4	2.30662e-05	0.010862	0.793248
013e234d-7215-403b-aba6-e5fd33f976ab	f5c	uncalled4	1.32955e-05	0.00121388	0.779101
01416fb2-bb68-43a3-a790-a05120484627	f5c	uncalled4	2.21873e-05	0.00200238	0.77617
0141a2c2-36b5-4774-8aac-2c1ef4e5114f	f5c	uncalled4	2.47539e-05	0.0142259	0.784999
0141f3e6-2bf5-4fbf-bc0a-1a9c5a6755ff	f5c	uncalled4	3.13682e-05	0.002665	0.764662
014289ec-a80f-408d-ac3d-d28ab97743f7	f5c	uncalled4	2.52362e-05	0.00148713	0.796384
014389bf-0532-40cb-8fa1-e68f2913aecc	f5c	uncalled4	9.65805e-06	0.00239872	0.80367
0143aecc-e261-4db9-9a0f-2bc61a4ba417	f5c	uncalled4	1.47505e-05	0.00221336	0.763237
0143c0e4-f473-499b-83aa-eedb76ddce43	f5c	uncalled4	1.305e-05	0.00221743	0.776938
01452a5f-8e8a-4a46-8c24-2d8b25dadcbe	f5c	uncalled4	1.73483e-05	0.00109527	0.763226
014573d1-7fd9-4736-b7b9-0ef1fd7de953	f5c	uncalled4	2.06647e-05	0.00502177	0.771635
0146128d-af38-4da2-a5bb-a6acf884178d	f5c	uncalled4	2.77111e-05	0.00291976	0.777859
0146e2fe-b042-4982-973b-38884f5c7ed2	f5c	uncalled4	1.24483e-05	0.00128426	0.779443
01488373-b852-43fe-88e5-a5aa8263613f	f5c	uncalled4	2.55346e-05	0.00192929	0.769676
0149a5bc-ee19-4533-a8b1-083e6a74a6ed	f5c	uncalled4	5.32421e-05	0.0131695	0.774318
014bc01f-79eb-4b6d-8350-15b92581c424	f5c	uncalled4	1.85061e-05	0.00284661	0.783522
014cab39-f4d0-47b2-8081-3d64c2d8c492	f5c	uncalled4	1.54447e-05	0.00348207	0.763474
014cca0d-4017-4054-8109-5b128550a48c	f5c	uncalled4	1.69176e-05	0.00128379	0.772622
014d4d8d-82c8-4e05-bb9f-24fea7c1f7e7	f5c	uncalled4	8.37466e-05	0.015443	0.769921
014d7135-154a-418f-8f90-05e2cee27b84	f5c	uncalled4	1.40177e-05	0.00127944	0.734298
014e1916-6372-4f3d-a7e7-d20a7685bee0	f5c	uncalled4	1.9121e-05	0.00633423	0.785477
014e44f7-1515-458e-b8e0-6fd2e8c5ba14	f5c	uncalled4	2.34415e-05	0.00251502	0.789775
014eabb2-be7a-4474-a12f-b7de23a11250	f5c	uncalled4	1.37132e-05	0.000751426	0.750408
014f9b1b-e2aa-4f09-817c-6488dc1c2dd5	f5c	uncalled4	1.41166e-05	0.00247053	0.796358
015094c5-d875-4ec2-bf8b-123dccfd1f8a	f5c	uncalled4	1.66083e-05	0.00185019	0.773986
0150a03d-f6cc-4648-93c9-c556ab0b1685	f5c	uncalled4	2.36812e-05	0.00392636	0.775719
0151ce03-2185-43eb-8e2a-3113d223a6f2	f5c	uncalled4	3.66737e-05	0.00627388	0.787394
0154138b-87de-43e8-8f67-95a1f4417fa7	f5c	uncalled4	1.606e-05	0.0025447	0.769454
01542549-9c7d-4f94-8cdf-c7fa18fbeb45	f5c	uncalled4	1.26141e-05	0.00293989	0.772348
015433c8-72a7-4280-bbda-8ab5139efcf1	f5c	uncalled4	1.48906e-05	0.00651416	0.779646
01546d30-507c-47c9-bed4-413cc95ecb6c	f5c	uncalled4	1.43125e-05	0.00348338	0.789145
01548ca1-8f7b-4402-a3a1-0fefbc041a7a	f5c	uncalled4	1.88698e-05	0.001232	0.776325
0156058b-4732-40cc-8b4a-f361706790bb	f5c	uncalled4	2.35858e-05	0.00644055	0.7869
01568aba-9621-41c6-baa3-3168c21a08c1	f5c	uncalled4	1.7947e-05	0.00282102	0.747022
0156c228-a80f-4c19-a9f3-6c8fbb2c4f2e	f5c	uncalled4	1.55651e-05	0.00263497	0.772902
0156db18-44bb-44fb-99d0-3a2d673b0ebd	f5c	uncalled4	5.33837e-05	0.00260582	0.608979
0157027e-6a2e-48dc-a8e2-ccf444a9740e	f5c	uncalled4	1.02952e-05	0.000901717	0.796568
01570a9d-a4ee-439d-9a61-626969942bad	f5c	uncalled4	6.80093e-06	0.000498838	0.833681
015736ac-fa9d-45c6-b75d-7b7755096f9b	f5c	uncalled4	1.48397e-05	0.00145406	0.786909
015747d6-3e1a-416d-b343-d3f309b3c8d1	f5c	uncalled4	1.7381e-05	0.0031105	0.788337
0158e921-d0b3-4ec2-9a9e-408220b77bdd	f5c	uncalled4	2.55523e-05	0.00212034	0.791435
015905d9-d4a9-4702-81d6-2536f521e3f7	f5c	uncalled4	2.98581e-05	0.00227364	0.760258
015917ed-de46-452a-8652-ec8f87b6d34b	f5c	uncalled4	1.26482e-05	0.00335265	0.791034
0159ebd2-5745-4944-ad42-9b3ca73626d0	f5c	uncalled4	1.22821e-05	0.00277768	0.839091
015baa3a-d348-475e-83ce-c1cc5582454f	f5c	uncalled4	1.56023e-05	0.00417797	0.789094
015cfaf4-0233-45e7-ac39-2bec04ae43a5	f5c	uncalled4	2.01621e-05	0.00373861	0.764378
015d000c-05d2-45b1-90c8-3ee8f66d3e19	f5c	uncalled4	1.35844e-05	0.00116796	0.785637
015d73b2-a852-4929-9634-18d2a96cbd76	f5c	uncalled4	9.82218e-06	0.000620873	0.786312
015e4506-3dbc-41a9-a613-8d93f2d71814	f5c	uncalled4	1.84525e-05	0.00513458	0.777725
015f3c67-7f24-4db7-981b-be1aced2466c	f5c	uncalled4	1.58497e-05	0.00284123	0.77472
015f4b57-f85e-4d9c-baf2-50a7ce33eb53	f5c	uncalled4	2.61283e-05	0.00529101	0.759698
015fc6cb-49f2-4d68-a2ae-ac4090bfb1b9	f5c	uncalled4	1.67395e-05	0.0025406	0.795347
0160d670-155c-437f-83cc-5f0efd310439	f5c	uncalled4	1.60876e-05	0.00465392	0.7835
0160f52b-5ae5-463d-8651-ce6313cdb366	f5c	uncalled4	2.9151e-05	0.00497312	0.78477
0163ed58-5488-4722-a995-5e5270aba365	f5c	uncalled4	1.12244e-05	0.000589843	0.776398
0164b2ef-d55d-495b-8374-414d11511983	f5c	uncalled4	3.08929e-05	0.00173764	0.787172
0164d745-2aa9-4f5d-939c-0dcdb7a37ce1	f5c	uncalled4	2.57041e-05	0.00485322	0.786006
01662824-b269-47f9-abb2-a238344752be	f5c	uncalled4	1.21939e-05	0.00204407	0.777114
01662ac0-555c-4796-b82d-e7c53c0fe6d3	f5c	uncalled4	2.20087e-05	0.00255231	0.792623
016696fd-6d46-403e-b2d1-17fd5d9e5268	f5c	uncalled4	1.6078e-05	0.000807845	0.75732
0166d7f0-34bb-4d04-823c-fa6d37fec705	f5c	uncalled4	2.85803e-05	0.00343854	0.773706
016725bc-f2a7-40a2-91b3-ea63df375a32	f5c	uncalled4	1.06762e-05	0.00149473	0.802126
01673a8f-628a-45f4-bbc8-7bdae3b29f4d	f5c	uncalled4	1.53086e-05	0.00163877	0.752298
01676bb8-cd2d-4687-bd1d-ee6003dd72c8	f5c	uncalled4	1.65464e-05	0.0092425	0.794745
016828de-d3e6-4378-9944-4faac4fde289	f5c	uncalled4	2.39797e-05	0.00550635	0.795819
01683ca1-4754-463e-9306-91f6438d46ea	f5c	uncalled4	1.8693e-05	0.00249086	0.785982
0168e94d-56d9-4bf7-a979-813faacf20a9	f5c	uncalled4	1.91761e-05	0.0011492	0.756502
016912a3-bdc4-4393-bbe3-2dec7692054c	f5c	uncalled4	1.19403e-05	0.00126987	0.74984
01691d23-c863-4a8e-8b56-725f4ea02fe1	f5c	uncalled4	3.28649e-05	0.00760389	0.800856
0169c8d4-115d-47a1-9269-5eea314be121	f5c	uncalled4	2.38313e-05	0.00492129	0.774047
016aae5b-ab89-478c-bf2a-314e98bb59e1	f5c	uncalled4	2.9145e-05	0.00616846	0.793515
016b74e2-e0e7-4ca3-8a71-b4ee629475ef	f5c	uncalled4	1.74779e-05	0.00681329	0.787337
016b874a-c30a-4d2e-aae1-2e52dea122d5	f5c	uncalled4	1.63049e-05	0.00138069	0.764173
016c255c-1b66-4d96-88eb-2a2801c015ee	f5c	uncalled4	1.4302e-05	0.012837	0.784004
016ca378-ef46-458c-b413-a9d16b5ac114	f5c	uncalled4	1.77488e-05	0.00188233	0.77547
016d743e-296b-4924-afa8-545d8e98256a	f5c	uncalled4	2.44621e-05	0.0031531	0.755383
0170b2d2-d6c9-4c4c-b58f-0d0870660662	f5c	uncalled4	1.80321e-05	0.00337736	0.787027
0170be60-07bc-44a1-a679-d07d5d3b19d3	f5c	uncalled4	1.45052e-05	0.000955832	0.78131
0170f9c5-61cd-4056-8cdb-4c93d51e8d3a	f5c	uncalled4	3.34724e-05	0.00254465	0.752169
0173f757-5ca0-49c5-8d8b-6a2597c8bc1f	f5c	uncalled4	1.00141e-05	0.00119082	0.786761
017470ce-2292-4c68-acdb-7f995a827f75	f5c	uncalled4	1.29912e-05	0.00433292	0.790118
0175f001-574e-4c78-af04-9e8420246cd3	f5c	uncalled4	1.63641e-05	0.00115398	0.779602
0176bd27-3efe-4fde-a3ad-b8404bf2d897	f5c	uncalled4	0.00149333	0.23393	0.696374
01776bd8-ce81-4efc-9c56-f20fc07c2b91	f5c	uncalled4	1.57056e-05	0.00193619	0.780736
0177cf6e-b8f5-471b-b8db-b36d43d9854a	f5c	uncalled4	1.27781e-05	0.00436473	0.7803
01781da5-4abb-4f7e-a020-cca1f13de897	f5c	uncalled4	1.10522e-05	0.00133715	0.784286
01793930-a011-4e07-9d98-62853ad5f42d	f5c	uncalled4	1.41573e-05	0.00149645	0.774352
017a0250-7bb7-4fed-88fc-a4408dea90e2	f5c	uncalled4	1.73081e-05	0.0035912	0.779933
017a4be7-8fe7-4626-9f27-e2e28599be8d	f5c	uncalled4	2.74569e-05	0.00232496	0.775713
017a885a-9666-4103-97d6-d9024d326d99	f5c	uncalled4	1.44956e-05	0.00131571	0.769216
017abbcf-d333-4499-a5be-d4d3db552458	f5c	uncalled4	2.46654e-05	0.00316334	0.73866
017b73d6-4eda-4ee3-ab64-ba8e959e2635	f5c	uncalled4	1.16897e-05	0.000788802	0.77399
017bd43c-dedd-460a-8d23-6eb581e228b8	f5c	uncalled4	1.21268e-05	0.00131893	0.788541
017c3421-ec88-4e83-9008-0526568c1d5d	f5c	uncalled4	1.5845e-05	0.0010389	0.78202
017db649-a135-43da-ba2f-d3993bc8ffa2	f5c	uncalled4	2.96395e-05	0.00627961	0.77816
017dbc55-5218-4069-a983-7302178c3a29	f5c	uncalled4	1.90814e-05	0.00122231	0.79554
017dc9ab-8c6e-4f68-8ff2-1f3bff149a6a	f5c	uncalled4	1.76971e-05	0.00143141	0.782795
017e355e-5834-4f37-9033-827cc15934f4	f5c	uncalled4	1.59749e-05	0.00103488	0.795997
017e60c9-7295-493d-9fef-d6b13819e186	f5c	uncalled4	1.52171e-05	0.00282137	0.798133
017fd26f-02e0-48ca-8930-8401be48f049	f5c	uncalled4	1.21767e-05	0.00249826	0.793347
0182581b-9ed7-4b14-9f43-33b25d6b8521	f5c	uncalled4	1.08595e-05	0.00275557	0.783971
01836581-1c24-451a-8028-db76872d2097	f5c	uncalled4	3.06942e-05	0.00327296	0.778616
01848bb0-0db1-4cc0-b6ff-86cc5d59b8d8	f5c	uncalled4
0184eeeb-7800-49a3-9e2c-c1620741ad19	f5c	uncalled4	1.32082e-05	0.000677715	0.783843
01862550-2603-4a32-bb46-ef3e89ebe80f	f5c	uncalled4	1.62481e-05	0.00835987	0.769715
01862c91-1362-4bda-9e19-543f2273524f	f5c	uncalled4	1.22956e-05	0.000750101	0.777253
0186a5eb-3f7c-4724-9f78-8b8fc2f68a21	f5c	uncalled4	0.000679888	0.136615	0.631877
0186b471-91ad-4cc2-803a-70cba77426a3	f5c	uncalled4	3.04515e-05	0.00618074	0.771064
0186cfca-caaf-4ce3-91d5-5782188fe3c1	f5c	uncalled4	1.49551e-05	0.000987685	0.783806
01877bc1-cb96-4a59-8be1-92090fb6c345	f5c	uncalled4	1.11947e-05	0.00341916	0.773704
01894a3b-ce28-4ff3-a25e-7690007fab45	f5c	uncalled4	2.81224e-05	0.00373852	0.768409
018952ec-7fe8-4af0-b642-7bcdb925e0f1	f5c	uncalled4	1.78829e-05	0.000675984	0.793514
018967f9-a56f-4c3d-88b9-aa3987a44f47	f5c	uncalled4	1.76317e-05	0.00325212	0.746056
01898d0f-28c6-49a3-91e0-5073adb80716	f5c	uncalled4	1.20824e-05	0.00298068	0.786296
0189af72-db34-438a-8993-b96c8e03cc81	f5c	uncalled4	1.20424e-05	0.00232583	0.788633
0189efad-a35d-4f91-95a2-6892ad7ec83c	f5c	uncalled4	2.22886e-05	0.0011318	0.780956
018a375f-26ab-4e77-b8a5-4f14b57abefa	f5c	uncalled4	1.51684e-05	0.00337493	0.797464
018b2525-8fe3-4715-9a8c-94d8eb12cdaa	f5c	uncalled4	2.58176e-05	0.00140234	0.735281
018b971e-c5ef-4df5-8093-b498c47ac200	f5c	uncalled4	1.84832e-05	0.00284737	0.777663
018b9b75-28b0-4917-ad8e-7be906798038	f5c	uncalled4	1.88186e-05	0.00383119	0.793051
018ba646-db10-4d1a-ba1a-ff7b541aef39	f5c	uncalled4	2.98289e-05	0.00256776	0.747155
018dc7ec-0b0a-483e-b1eb-d9536ba13655	f5c	uncalled4	1.93581e-05	0.00332742	0.77496
018df9a5-4553-404c-8661-9982cb22ab79	f5c	uncalled4	2.44889e-05	0.00485171	0.790229
018e99f3-ea30-4fd2-a935-283f358ee660	f5c	uncalled4	3.22075e-05	0.00252402	0.773644
018fc2ff-61d7-4488-996d-37bc0ce518bc	f5c	uncalled4	1.39269e-05	0.00276787	0.782537
01900df6-2ffe-46c8-a3d8-5e882573eec6	f5c	uncalled4	1.14914e-05	0.0017442	0.779689
0190129c-2cc8-41bb-9455-aae2e062ab7d	f5c	uncalled4	1.63671e-05	0.00381932	0.771859
01909eb5-794b-434f-972b-06d9a4fa1a48	f5c	uncalled4	1.46654e-05	0.00123033	0.76207
019290dc-4eee-40b1-9057-0a1ee730df48	f5c	uncalled4	9.3904e-06	0.00121671	0.795076
0192b3e5-3010-4018-9ce5-feb29f41d9c1	f5c	uncalled4	1.08054e-05	0.00108989	0.784149
0192c62d-730b-430c-a7cd-efb5e48878b0	f5c	uncalled4	1.58533e-05	0.00747443	0.773274
0193452a-4c7e-4523-a069-4e4de4d027b0	f5c	uncalled4	1.28062e-05	0.00107801	0.800103
01952170-ff9f-46da-a0b8-6bae8acc8e1b	f5c	uncalled4	1.52501e-05	0.000807456	0.776787
0195e05c-66d5-4b9f-b259-bc114754646e	f5c	uncalled4
01965b96-da1b-4057-a845-f6f3297d9e05	f5c	uncalled4	1.03388e-05	0.00109043	0.797059
0196605e-78c3-48cb-bbf8-b1d80582afad	f5c	uncalled4
0196fa01-e14c-4ddb-bbf5-747deafc88d9	f5c	uncalled4	1.54895e-05	0.0026504	0.75204
01973a9d-302e-4657-a58a-bb8a6851ae60	f5c	uncalled4	1.10124e-05	0.00127437	0.782437
019779ef-90ae-4fa3-a4c8-8dd6db1fbeae	f5c	uncalled4	3.48655e-05	0.00519443	0.781243
0197e573-430a-48cf-9049-5ed26908cbed	f5c	uncalled4	1.51512e-05	0.00167225	0.78561
0197fe2f-c222-44fd-aef4-c7184682adc5	f5c	uncalled4	1.20995e-05	0.000797381	0.776595
019820bb-d43c-4794-b326-0dfdb9055e1f	f5c	uncalled4	2.36269e-05	0.00204954	0.772371
01985a1a-dc82-4cbe-af16-bc90fd16e411	f5c	uncalled4	1.69161e-05	0.00320798	0.761195
01987dbd-16d4-46c8-8e72-896d572824a9	f5c	uncalled4	2.92776e-05	0.00546836	0.780872
0199340b-b028-4fac-b3da-aade707f8e54	f5c	uncalled4	1.53528e-05	0.00480067	0.783415
019a9c19-2256-4e01-aab4-a764a34413b8	f5c	uncalled4	2.23094e-05	0.000812339	0.783193
019d34a1-397d-4898-83b8-496150db2f10	f5c	uncalled4
019dfbd7-7e60-4ff6-8e40-90658cfa5ba9	f5c	uncalled4	3.97147e-05	0.00546295	0.753003
019e2439-3f24-42f0-826b-920299f0701c	f5c	uncalled4	2.52162e-05	0.00159408	0.778733
019e60b1-d24a-4294-968e-067000bbce15	f5c	uncalled4	2.21656e-05	0.00102317	0.674685
019f8465-2b8c-4a32-9b94-33e737d7831e	f5c	uncalled4	1.77273e-05	0.00249604	0.746946
01a078c0-5a1b-4b78-859b-2dc16742f8d7	f5c	uncalled4	4.22701e-05	0.0134226	0.773503
01a21102-5a42-4eb2-893c-01ad7e5175e9	f5c	uncalled4	2.42632e-05	0.00142004	0.774442
01a228f6-0445-4265-a733-795e8356c891	f5c	uncalled4	1.53911e-05	0.00112075	0.791524
01a2729d-27a0-4e5e-8d59-7fc0892e8c96	f5c	uncalled4	1.89524e-05	0.00131115	0.776089
01a27b79-453e-468a-9b92-d6ad461a9382	f5c	uncalled4	2.39587e-05	0.00274808	0.711734
01a2aeaa-31d5-4549-923f-6a98e1cc0611	f5c	uncalled4	1.81139e-05	0.00435596	0.793378
01a2ca3d-6324-4dd9-b64b-3e0b3ddd41c6	f5c	uncalled4	1.94308e-05	0.0010881	0.790808
01a2d942-6802-4cff-9d04-31ec6e5cfbfe	f5c	uncalled4	2.22819e-05	0.00117514	0.784567
01a387c3-a1ff-4f6b-a300-711ba3fd8097	f5c	uncalled4	2.03945e-05	0.000868017	0.675374
01a51fe3-f923-47ad-a72c-c91c04d1fc07	f5c	uncalled4	1.58629e-05	0.00366495	0.768325
01a56a46-ef9c-42a7-aa69-aec8e8563f1d	f5c	uncalled4	2.43606e-05	0.00168986	0.74786
01a5a624-a229-414f-9563-0359bb58cded	f5c	uncalled4	2.70384e-05	0.00753062	0.786512
01a5db3f-255a-4476-a6d6-7e6485302352	f5c	uncalled4	2.13218e-05	0.00206661	0.795471
01a6dbb4-9420-4da2-8b79-3aad0646523d	f5c	uncalled4	1.13399e-05	0.00221405	0.785341
01a757cd-077c-4513-a327-c7e8372b1616	f5c	uncalled4	2.40452e-05	0.0042145	0.762575
01a8ccc4-395a-44c0-b2fe-512f5551438b	f5c	uncalled4	1.59362e-05	0.00143845	0.770952
01a8dcb6-efde-4d8d-a41c-a03b7ef7776e	f5c	uncalled4
01a950ff-a766-4d02-b01a-f9702bc3a409	f5c	uncalled4	1.44213e-05	0.00149246	0.777183
01a9f1fe-e0e0-4c49-ae3c-da0bdfa94332	f5c	uncalled4	1.07263e-05	0.00191727	0.799072
01aab995-e37e-47f9-aeb0-af79feff2df6	f5c	uncalled4	1.19603e-05	0.000740061	0.784947
01ab0dc9-9c6e-4a62-9449-f260bef2e0f6	f5c	uncalled4	3.10774e-05	0.00675938	0.759634
01ab1b00-e5b1-4940-87c3-fcc099de16f0	f5c	uncalled4	1.81661e-05	0.00103691	0.759661
01abac81-e8ad-4ed3-8640-841a1e27ea20	f5c	uncalled4	0.00211107	0.438439	0.746532
01ac97de-d5c8-4eec-95d5-201e37c08f53	f5c	uncalled4	2.08907e-05	0.00318985	0.787605
01ad12a7-53d7-45d4-acaf-34124d52f793	f5c	uncalled4	1.15473e-05	0.000656403	0.773518
01ad27a5-7ee3-4a36-976a-fe8dc5f3cacb	f5c	uncalled4	1.57366e-05	0.00201614	0.780638
01ad31b9-ab3c-4ae0-873c-6def2c689d6f	f5c	uncalled4	2.03549e-05	0.00382827	0.776938
01adef8d-fb96-4f13-8154-15c9e54cc8df	f5c	uncalled4	2.09904e-05	0.00181007	0.791588
01b15d8c-959e-4d75-8a43-a7c0a2fef511	f5c	uncalled4	2.1907e-05	0.00157821	0.773077
01b1e2c0-4c8f-4974-8aae-114ec5acb07e	f5c	uncalled4	1.43495e-05	0.000847141	0.768614
01b3f95b-ec73-4f4d-bd58-14e847c76f35	f5c	uncalled4	1.95894e-05	0.0011021	0.794516
01b49131-f208-487b-99f7-d497121beef6	f5c	uncalled4	2.12986e-05	0.00120435	0.763871
01b53ae4-085e-480c-acbd-b7788f88b593	f5c	uncalled4	0.000270925	0.184054	0.83217
01b6e735-91f5-4674-abd9-30041b65bc7c	f5c	uncalled4	1.36961e-05	0.0021566	0.797366
01b7255a-dd75-4c5b-9746-b5f36ff72cda	f5c	uncalled4	3.20501e-05	0.00479098	0.772002
01b74c9d-da6c-46ab-8bfa-98de25432a8b	f5c	uncalled4	0.000113412	0.00836623	0.774947
01b7e60c-90af-4bf2-8f43-7a599d669077	f5c	uncalled4	2.38399e-05	0.00216096	0.800406
01b7f6d0-043e-49ff-a993-371a9ed19b9e	f5c	uncalled4	1.40778e-05	0.00128781	0.774596
01b83dd1-7f7f-40a1-b799-9a2611c45783	f5c	uncalled4	1.35815e-05	0.0071662	0.795678
01b892e2-577a-406f-8c5e-c185e1434678	f5c	uncalled4	1.13297e-05	0.00338111	0.77445
01b89d3e-3265-49ae-9903-9bf0d0eeacb1	f5c	uncalled4	1.93041e-05	0.00151668	0.771263
01b99b4b-76f3-41c9-93fa-aaf2ea1ad1bd	f5c	uncalled4	2.79945e-05	0.00416789	0.777457
01bcafef-1be0-4eea-aeda-16b63654bbac	f5c	uncalled4	3.73435e-05	0.00901599	0.766905
01bd4761-cc5f-4aee-b883-03b5a4c1b195	f5c	uncalled4	2.08297e-05	0.0027603	0.789018
01bd4d23-2a69-4a59-8576-cf58e21d210f	f5c	uncalled4	3.56771e-05	0.00594427	0.782413
01bdc0af-d678-4df3-a9da-c5d6b1477a53	f5c	uncalled4	1.13763e-05	0.00100418	0.790401
01be82c9-7678-40e9-8af1-af8e799b1ab0	f5c	uncalled4	1.04454e-05	0.00264151	0.771126
01bec7c5-2c46-44b6-b5fa-f874762b173b	f5c	uncalled4	2.68607e-05	0.00579483	0.759413
01bf1f5a-3d04-4adc-83b2-94cdb214ea0c	f5c	uncalled4	1.58843e-05	0.000816803	0.773445
01c0760a-43ee-422d-8651-59bff0c50590	f5c	uncalled4	0.000100592	0.00757766	0.764596
01c0e343-79da-4908-9f98-128f587f8f39	f5c	uncalled4	1.22856e-05	0.00076293	0.789389
01c0f7e2-6ad9-4b41-b6eb-59e56792ecf1	f5c	uncalled4	1.61154e-05	0.0015577	0.78465
01c16e11-5311-476a-9e2c-2890fbed0834	f5c	uncalled4	1.36996e-05	0.00166605	0.756765
01c1a05a-732e-48ce-a3cd-8d7271873dd9	f5c	uncalled4	2.04842e-05	0.0011062	0.800486
01c28710-f6d2-4553-8e95-9f84409879d3	f5c	uncalled4	1.687e-05	0.000783543	0.791629
01c2f0f7-efce-4ffc-a805-1ea66a4dd0da	f5c	uncalled4	2.22857e-05	0.00162921	0.771964
01c3b247-fa7e-4744-8469-d839777f5a64	f5c	uncalled4	0.000610958	0.191963	0.780482
01c44633-5257-4d9f-9d2b-1482a6c67a20	f5c	uncalled4	2.16203e-05	0.00468326	0.786377
01c44a5a-9f12-4173-bca2-fe341875dbd5	f5c	uncalled4	2.64286e-05	0.00172417	0.792214
01c4593d-c1c6-4df6-9aca-2cc71e1269ea	f5c	uncalled4	1.79423e-05	0.00117903	0.766414
01c48568-914a-4fb4-b858-c229d3386161	f5c	uncalled4	2.18057e-05	0.00507494	0.762974
01c4c6fd-c943-4e8b-a2d3-e79bde6af2ae	f5c	uncalled4	0.000903097	0.267188	0.767702
01c50da7-3138-4d61-9fc8-ac255179a793	f5c	uncalled4	2.60381e-05	0.00319279	0.770156
01c5ba59-ed7e-4501-9bbe-1d79df1fa8a5	f5c	uncalled4	1.9932e-05	0.00125277	0.775999
01c72402-4938-4033-a919-3b0081b4aa55	f5c	uncalled4	1.19853e-05	0.000715188	0.747341
01c8bf20-60fc-4a03-9e84-1fd08b4635d0	f5c	uncalled4	1.35515e-05	0.00123774	0.767535
01c9d006-c621-49bd-8a79-b803ab77eff3	f5c	uncalled4	3.42127e-05	0.00942767	0.763546
01cace02-e20f-48ba-be2d-25fd79778b3a	f5c	uncalled4	1.4173e-05	0.00137429	0.759755
01cd57fe-f692-4bd2-836e-f42fd545ac3f	f5c	uncalled4	1.16497e-05	0.000532941	0.772953
01ced19a-7b18-499e-bc9c-2cdcb2c542b9	f5c	uncalled4	1.22699e-05	0.00189581	0.783923
01cfe4ef-1f26-4aee-a4d3-7233c33e6ba9	f5c	uncalled4	1.17385e-05	0.000645028	0.780326
01d072f1-9d4b-4886-8cd1-8f6d94c01258	f5c	uncalled4	1.56552e-05	0.00358872	0.762367
01d19951-75ab-4674-a12c-8166f5978d92	f5c	uncalled4	1.80957e-05	0.00140646	0.783973
01d322fe-6be1-470d-806a-9e65da8d1d89	f5c	uncalled4	1.37574e-05	0.00180499	0.795986
01d34a0a-c89f-4460-bc24-308bd7c0b830	f5c	uncalled4	1.53361e-05	0.0012878	0.776398
01d41af0-6622-427c-98d8-7fa3c1668e98	f5c	uncalled4	1.00459e-05	0.000907519	0.77673
01d47672-97e2-4fd6-911c-624bab99f5c2	f5c	uncalled4	1.91257e-05	0.00506848	0.770962
01d4b94c-de6f-4fe2-a6cf-518fce315715	f5c	uncalled4	1.48075e-05	0.0017868	0.780024
01d4de18-9fd6-4170-a024-21ddb462ee77	f5c	uncalled4	1.27296e-05	0.00513246	0.814712
01d4e8cb-3b34-43bc-9466-03a50dfb947a	f5c	uncalled4	0.000775807	0.20943	0.653773
01d57b21-27bd-44fd-99ca-d9122ebe9242	f5c	uncalled4	0.00604095	0.239256	0.55428
01d5911e-8f64-4848-909e-97c2ff4ab3de	f5c	uncalled4	0.000229785	0.029769	0.767082
01d80b15-244c-4b05-aea1-3f13ede0081c	f5c	uncalled4	1.61068e-05	0.00108075	0.714372
01d92d64-96bc-46dc-9187-5524edfeff7c	f5c	uncalled4	1.21519e-05	0.00134036	0.789663
01d9898f-25b0-46b0-a97b-a2801e809355	f5c	uncalled4	1.52127e-05	0.00188458	0.787093
01da0215-604f-425b-9637-1eee8f739396	f5c	uncalled4	1.4537e-05	0.00185937	0.776616
01da4674-ed64-451f-84e7-37a4e3e4352f	f5c	uncalled4	1.01101e-05	0.00120582	0.782192
01dc2c86-043f-43c0-8a48-03ce650a1cee	f5c	uncalled4	1.35524e-05	0.00183263	0.776553
01dd3ca7-d9a2-4a89-8d4d-79d961f0d400	f5c	uncalled4	0.00164782	0.292151	0.749412
01dd9b68-aaa2-4bdd-b49e-fad56699c110	f5c	uncalled4	1.09223e-05	0.00196845	0.781653
01de030d-8498-4d07-98fa-184a1992b391	f5c	uncalled4	9.98479e-06	0.00137251	0.788575
01de65ca-d0f3-4ada-bf80-1cce581f40f1	f5c	uncalled4	1.89758e-05	0.00395109	0.784692
01dfadd9-00dd-459e-ac31-e6fac032eeac	f5c	uncalled4	1.54271e-05	0.00105234	0.784702
01dfbf01-6c0f-43fc-b178-a04e855ee52a	f5c	uncalled4	1.07157e-05	0.000705284	0.778089
01e09080-b80d-4f96-8ef7-b6c2eb43e614	f5c	uncalled4	1.14065e-05	0.00173469	0.794456
01e11106-e55e-4ce4-a21e-74f3184c3deb	f5c	uncalled4	1.83506e-05	0.00446547	0.794101
01e19f53-77fe-4ae2-ad62-3e9c36ea1c81	f5c	uncalled4	1.72757e-05	0.00232667	0.769311
01e1c379-960f-41a7-89b7-6062ed610f55	f5c	uncalled4	3.24275e-05	0.00499747	0.750375
01e242ee-923d-482d-a418-bdeadfb0d612	f5c	uncalled4	2.89449e-05	0.00759941	0.791439
01e25b35-2342-4e95-9bca-da7c7b520776	f5c	uncalled4	1.4281e-05	0.00596064	0.783499
01e29d66-89de-4a46-ac92-95986fe17f3b	f5c	uncalled4	1.325e-05	0.00536168	0.776573
01e2e8a4-d7d5-4a39-ae53-79d755d8b563	f5c	uncalled4	1.50381e-05	0.00105058	0.793163
01e4472e-c122-4e4e-8075-64ec4338bb69	f5c	uncalled4	2.90222e-05	0.0020169	0.771446
01e464fb-29cd-4cd1-a9c2-4e1a21b08abc	f5c	uncalled4	1.18892e-05	0.00241659	0.783032
01e4b79b-b38d-444f-953d-461f60263441	f5c	uncalled4	1.51638e-05	0.00318471	0.786325
01e545b6-b591-443f-bb63-98cc62a46704	f5c	uncalled4	1.74329e-05	0.00115593	0.786874
01e55122-4179-43a0-88bc-bd8aa22f6b83	f5c	uncalled4	1.70929e-05	0.00138153	0.779774
01e670f2-872f-4830-ab87-18bd5d314e11	f5c	uncalled4	3.66395e-05	0.00634639	0.759268
01e69812-d395-4664-9dc2-6e2ff2ca8660	f5c	uncalled4	6.78141e-05	0.0103836	0.760393
01e7822d-503e-4b36-a668-57c4be4592dc	f5c	uncalled4	1.80254e-05	0.0010349	0.796091
01e7cf22-68b9-4840-9be4-8bcee0f27fcb	f5c	uncalled4	2.22973e-05	0.00156981	0.77412
01e7d5ea-b87e-4ff2-b2fb-15e40cbc083a	f5c	uncalled4	8.95634e-06	0.000863612	0.801545
01e852d2-e660-47cc-9bd7-d8d275f00a99	f5c	uncalled4	3.8178e-05	0.00804163	0.751226
01e8d1ba-521c-42bc-a5b8-2847ca505b1f	f5c	uncalled4	1.14089e-05	0.00113836	0.798397
01e94e42-5230-43ec-a978-9f619d3dac17	f5c	uncalled4	1.71397e-05	0.00121064	0.695404
01e95f3b-f027-4e1b-83b4-197873b9d274	f5c	uncalled4	1.54504e-05	0.00464427	0.774876
01eb3241-a67c-4315-9eaa-cfb980d42f95	f5c	uncalled4	1.08327e-05	0.00314486	0.77673
01eb822c-b02e-4b5e-bf36-352505aac91f	f5c	uncalled4	1.59812e-05	0.00461946	0.771395
01ebd860-3177-4c85-bebb-ffe5ed464734	f5c	uncalled4	1.45538e-05	0.00131606	0.79028
01ebe00a-46f8-447c-aef8-d1fc946c75fb	f5c	uncalled4	1.97173e-05	0.00131311	0.780274
01ec0a79-8fc0-4876-86f1-2d3bcd328cac	f5c	uncalled4	1.81058e-05	0.0011145	0.783622
01ec1aba-71ec-402b-a1be-397131bc15c4	f5c	uncalled4	0.00283351	0.305931	0.697135
01ec4aaf-f50a-4398-ab84-d2564c1bf91a	f5c	uncalled4	1.56587e-05	0.00169034	0.777884
01ef963d-a007-4e7d-bddb-e52c4cf32fcf	f5c	uncalled4	2.21235e-05	0.00343963	0.772573
01efb777-a74c-4c80-816c-7fbcba6ef967	f5c	uncalled4	1.10053e-05	0.0026453	0.783056
01f04d4b-8abf-4ce9-9ec7-ef6be359ec3e	f5c	uncalled4	2.71617e-05	0.00157206	0.765686
01f0d9de-d4a3-4ceb-aafb-80330bca8afc	f5c	uncalled4	1.92467e-05	0.00122906	0.767411
01f0f29c-5bd9-40ad-8016-9059a4190f33	f5c	uncalled4	2.58371e-05	0.00765613	0.788336
01f165db-9173-44cf-b940-c563a5437956	f5c	uncalled4	1.84385e-05	0.00348092	0.763279
01f34584-d660-4b02-a36d-2f1683ac20da	f5c	uncalled4	1.16235e-05	0.00107511	0.797212
01f34a2f-20f2-42f8-afb9-4848465f2574	f5c	uncalled4	1.82669e-05	0.00204663	0.785526
01f504e2-e47a-4343-942b-8989f6a98936	f5c	uncalled4	1.03553e-05	0.000521917	0.772605
01f5d25e-a04b-476f-9006-bc07248301eb	f5c	uncalled4	1.03159e-05	0.00465929	0.788931
01f7f395-5e22-483d-9392-1367bf284e8a	f5c	uncalled4	1.67033e-05	0.003051	0.7835
01f8c4b1-c347-4c1f-998e-6e61a9e3ff3c	f5c	uncalled4	9.49765e-06	0.000636315	0.793705
01f97b76-987f-4957-b045-8d27fe867788	f5c	uncalled4	2.53264e-05	0.00159014	0.781121
01fa2425-adb7-46a1-8c6d-b776573bd309	f5c	uncalled4	0.111977	0.225249	0
01fbb373-c561-46c5-a36f-21e154fabcc7	f5c	uncalled4	2.6468e-05	0.00807448	0.773447
01fbbbba-f438-4f9c-8916-c996b9e4b00a	f5c	uncalled4	1.01914e-05	0.00143152	0.775904
01fbde26-1ea1-478e-bfbc-deb3ccc8774c	f5c	uncalled4	1.81227e-05	0.00660471	0.782815
01fcdb58-b1d6-42fe-a11d-cdc81d0abd28	f5c	uncalled4	1.354e-05	0.000926286	0.798224
01fe1ebf-7969-4b18-ba0b-f69bb0de65f5	f5c	uncalled4	2.80268e-05	0.00992465	0.796727
01fe2143-addc-4819-982e-2300f833e881	f5c	uncalled4	0.000993041	0.236007	0.741121
01fe8bfa-1be9-4367-b71e-d059438c2293	f5c	uncalled4	1.37308e-05	0.00295885	0.782072
02003d23-893b-4056-bad0-c7a65e2a925c	f5c	uncalled4	3.00439e-05	0.00171541	0.783449
0200660f-7780-4dab-be56-ad85f194aabf	f5c	uncalled4	1.87675e-05	0.00232913	0.796656
02010f6c-b632-4543-aacf-f214ead6a9c5	f5c	uncalled4	3.09245e-05	0.00278368	0.78695
02018cbf-730c-4646-a2ec-6af379ce2ab4	f5c	uncalled4	2.02031e-05	0.00137535	0.770155
0201bcb8-5f30-493a-a739-790a4284fa4d	f5c	uncalled4	3.3203e-05	0.00176044	0.770191
0201ca65-678e-478d-ac88-4411eca9991c	f5c	uncalled4	1.40101e-05	0.0020147	0.746164
020244aa-f871-4a8b-8ae9-78f9f846bb6a	f5c	uncalled4	2.44683e-05	0.00235555	0.76273
02031793-564b-455a-94a2-66ee0f01bf2d	f5c	uncalled4	1.11903e-05	0.000903623	0.763723
02031ceb-360c-496a-804e-e8f873eec594	f5c	uncalled4	1.09968e-05	0.00122105	0.779039
0204d2f9-5025-41e9-a44e-6455299da695	f5c	uncalled4	0.000396397	0.188841	0.762348
0204ec88-c2df-4256-8c21-e3052edaf035	f5c	uncalled4	9.20838e-06	0.000697703	0.798553
0205387f-8ca3-4eaf-a841-07feef6dca68	f5c	uncalled4	3.10882e-05	0.00342443	0.775637
0205854f-5328-42f3-96ab-f58e81f64a1c	f5c	uncalled4	1.10254e-05	0.00287621	0.788524
02064954-c9c5-41df-b6ee-ac3f7892347b	f5c	uncalled4	0.0953355	0.180215	0
020672a5-ef42-4205-8105-02363b2c1764	f5c	uncalled4	1.45669e-05	0.00334943	0.765562
0207b4aa-2987-450c-8632-abcb1d2e3125	f5c	uncalled4	2.26337e-05	0.0017182	0.76318
0207e82f-6740-46cd-9825-640d46fffe17	f5c	uncalled4	1.79432e-05	0.00181218	0.753205
0208e08e-c3f1-4d54-98c1-67ab73871958	f5c	uncalled4	1.80815e-05	0.00148841	0.782836
0209c637-9512-4bd0-ab2a-0e416b656c47	f5c	uncalled4
020a263c-2e09-45ca-a6ce-05b745bdffb6	f5c	uncalled4	1.53603e-05	0.00425707	0.776689
020b3365-ba0b-4320-95b0-29224dfd4e9d	f5c	uncalled4	2.57802e-05	0.00115738	0.743272
020b4ab9-ebce-498d-a3f3-ab4691d5df5b	f5c	uncalled4	2.3213e-05	0.00543799	0.773196
020b5654-1363-4a4f-bdb8-52c0343dcdaf	f5c	uncalled4	2.99876e-05	0.00830331	0.792561
020c2606-81db-402c-b3b1-5a6052652f43	f5c	uncalled4	2.00405e-05	0.00364301	0.771632
020c3426-ff41-42bb-9974-c5ab5dd59cef	f5c	uncalled4	3.22619e-05	0.00902453	0.791534
020c7ad1-c7d0-4b25-965d-5de60325c9fc	f5c	uncalled4	1.20312e-05	0.00249959	0.789794
020c7e53-1530-4862-bc3f-2266d96a0a0c	f5c	uncalled4	2.92526e-05	0.00330374	0.777453
020d5dc6-1354-4c23-a0e3-fbc992d6424a	f5c	uncalled4	1.14128e-05	0.00134122	0.781904
020dd545-7c61-4af1-91a5-c9af91cdd3bc	f5c	uncalled4	2.52889e-05	0.00132978	0.758537
020ddce6-f19f-4c80-9995-56a699ec6f47	f5c	uncalled4	1.51824e-05	0.00363874	0.785594
020e30f9-4efb-43a3-b1ce-c499331fb551	f5c	uncalled4	0.000493146	0.0117391	0.74584
020ee9e7-48b0-4271-8648-1da1a9abe73a	f5c	uncalled4	2.68505e-05	0.00260514	0.772596
020f0cfc-1331-489a-a650-0a935ca94d23	f5c	uncalled4	1.33218e-05	0.00218792	0.775735
020f0fbd-9f81-4919-81d3-93dd0bdb7ba3	f5c	uncalled4	1.54006e-05	0.00224922	0.768339
0211314f-efcc-4665-90d9-f0ccc56cc224	f5c	uncalled4	4.83662e-05	0.00628327	0.786222
021140c7-fe64-4885-a79f-69e343b70fa8	f5c	uncalled4	9.68903e-06	0.00076392	0.779367
02118b6c-be50-4d8d-b227-20f066ab1012	f5c	uncalled4	1.10161e-05	0.000929722	0.781427
0211fbc5-8e85-4906-83e2-2a7905495bf1	f5c	uncalled4	1.25648e-05	0.00171069	0.789188
021244fb-dd4e-4518-b960-7b59ba7ec3c0	f5c	uncalled4	1.28349e-05	0.000698801	0.786332
02126552-effc-4b94-8608-0528d3af8908	f5c	uncalled4	1.69681e-05	0.00187312	0.784951
0213d50a-f7b5-4544-9e8a-6a2175c3e84b	f5c	uncalled4	1.97549e-05	0.00241697	0.769821
0214f339-0071-4e24-9c0d-2be0088e3d62	f5c	uncalled4	1.45767e-05	0.00120985	0.801642
0215c622-9ec2-497c-84fd-745b43227506	f5c	uncalled4	1.07083e-05	0.00121422	0.786175
02160cb8-3468-4f4d-a8c2-cd4e0a4c01cd	f5c	uncalled4	1.0638e-05	0.000613681	0.799195
0216d4bc-0089-428e-94dd-4de005c05c46	f5c	uncalled4	1.84997e-05	0.00134167	0.764874
0217ce2f-82e3-4b6f-8845-0f47e6ba88f7	f5c	uncalled4	1.03528e-05	0.000802292	0.79788
02191394-a581-4f30-9fbc-4f414b4c8f8f	f5c	uncalled4	1.91072e-05	0.00967778	0.802391
0219c703-ae78-4d2a-a7aa-471b00031198	f5c	uncalled4	1.94119e-05	0.00343043	0.782915
021daad4-e78a-4573-b3c0-a4b05b061e6f	f5c	uncalled4	1.82053e-05	0.00401397	0.791393
021df0f1-f65e-4e2d-91ca-22dadfdc2f10	f5c	uncalled4	2.1508e-05	0.00127418	0.786458
021e177e-fefb-43ae-aa76-755558db695e	f5c	uncalled4	2.32711e-05	0.00546233	0.796196
021e5dc8-ca7c-4329-ae33-5cb0fd089d7a	f5c	uncalled4	2.88425e-05	0.0044115	0.77551
021f2bcb-1138-43d9-8c76-20b0833e8de3	f5c	uncalled4	1.30636e-05	0.00342396	0.781688
021f77fc-9a93-49dd-9faa-2f763974ada7	f5c	uncalled4	0.00713193	0.0246685	0.351163
021f849d-c9c4-4b8e-853a-0d62307259ec	f5c	uncalled4	2.62443e-05	0.00123315	0.734087
021fc0e6-8534-4d9e-a66a-08cb1e461146	f5c	uncalled4	2.53072e-05	0.00687364	0.795972
021fd72c-dfdf-4eb6-92a6-25fb8b623df2	f5c	uncalled4	2.03287e-05	0.00558671	0.766555
021fdf00-5ddc-4870-aa93-17b8859dfe9c	f5c	uncalled4	1.16892e-05	0.00151687	0.764151
022172f9-fe77-40b8-9fed-e5200b558722	f5c	uncalled4	2.82275e-05	0.00222382	0.763744
0221e32d-0b8c-469b-9909-f2a62d8f043f	f5c	uncalled4	2.27198e-05	0.00363074	0.751709
0223a611-6bde-4200-a05f-ea34add45ce0	f5c	uncalled4	1.30717e-05	0.00149098	0.78088
0223ad18-adbd-45ab-95a0-eee8be4ae574	f5c	uncalled4	2.17617e-05	0.00123444	0.792142
0223c063-7b39-4214-a7be-bb57547d08e5	f5c	uncalled4	2.5058e-05	0.00197438	0.729472
0223cb41-9e84-489a-89f7-daa37b01b9ed	f5c	uncalled4	1.12002e-05	0.00154138	0.783878
0225c95c-f821-4e5b-a647-a14026a8b5f3	f5c	uncalled4	3.58519e-05	0.00206007	0.767324
022667f6-2a2e-4dd4-ab62-c1a8b0448715	f5c	uncalled4	2.85508e-05	0.00193639	0.748976
02270191-560d-4f63-8f47-c601173b0e91	f5c	uncalled4	3.79894e-05	0.00319362	0.702224
02271fdf-0ab4-4c67-8d41-d17873002106	f5c	uncalled4	0.0726545	0.132574	0.0140761
022855d0-ee4a-4b86-ab4a-e3a7b0cb4cdc	f5c	uncalled4	1.17016e-05	0.000903067	0.775655
0228effe-c0ce-4fd5-bb20-e18f6e386244	f5c	uncalled4	0.000231595	0.0101876	0.732092
02292e6c-5832-4de2-8dbb-b76d38cfc522	f5c	uncalled4	1.04818e-05	0.00273265	0.792589
02295e3a-40fd-4f93-9e56-6b14a1e8e965	f5c	uncalled4	2.02761e-05	0.00215252	0.780555
022a273f-b219-4640-95e2-ee155e9c4bf4	f5c	uncalled4	4.98432e-05	0.00775855	0.790974
022b0ec1-54bb-4797-b969-ada51bc2f324	f5c	uncalled4	2.34024e-05	0.0025841	0.777199
022b1e50-653c-466f-8af9-c7126cba8a05	f5c	uncalled4	1.2588e-05	0.000993519	0.789431
022b6663-83bc-440f-891e-6628fa5fc420	f5c	uncalled4	1.21058e-05	0.0010309	0.782235
022b86cf-3a02-4c7a-b0c6-6926f4ea59a3	f5c	uncalled4	1.34363e-05	0.00687456	0.783564
022ba52b-d538-45dd-9f18-da4484e0912f	f5c	uncalled4	1.86282e-05	0.0107471	0.765551
022c16f9-264f-475c-8837-d7f6884ce2fa	f5c	uncalled4	1.22643e-05	0.000956576	0.775974
022c55dc-5785-42ca-990c-ab0e127a2fa8	f5c	uncalled4	1.26723e-05	0.002664	0.789981
022e40c6-7ed9-4eb0-9036-ca345582816b	f5c	uncalled4	0.00029664	0.326258	0.699068
022f7942-0e50-46d4-b69a-b532c3a52176	f5c	uncalled4	1.0327e-05	0.00178617	0.783963
023071b9-3f29-4d7e-9301-b025ddb7548a	f5c	uncalled4	2.45851e-05	0.00449706	0.759046
02314ccf-37cb-4852-89b2-9934e96da4f4	f5c	uncalled4	1.06385e-05	0.000696359	0.800517
02321d47-f1c0-4a1d-9cbe-b013bea66653	f5c	uncalled4	1.40067e-05	0.000951751	0.80022
02322ef7-3ac4-4261-b187-84054301dd43	f5c	uncalled4	1.1673e-05	0.0029597	0.776667
02325f56-66a0-4bd4-9b8d-bdd0a5eadcaa	f5c	uncalled4	1.80245e-05	0.00344837	0.753081
0232a41b-b29c-4e22-b61f-d86910c6dbcf	f5c	uncalled4	1.04607e-05	0.00101037	0.791839
0235a324-a4b5-47ac-adb3-a2337da8bbd7	f5c	uncalled4	1.08093e-05	0.00195886	0.769135
023629a4-000e-4918-ac09-bd9e4861c15b	f5c	uncalled4	3.21874e-05	0.00161038	0.763055
02369a76-78ae-4829-9f2c-372a5ffee848	f5c	uncalled4	1.28786e-05	0.00207216	0.756433
0236b7a7-c35d-4695-8989-aab850802f31	f5c	uncalled4	3.1605e-05	0.00436898	0.785441
0236e316-262d-4b5c-ab56-b577364a9a5c	f5c	uncalled4	1.01294e-05	0.00146572	0.775926
0236ecf2-95b9-4ea7-882c-cc03e2a2951d	f5c	uncalled4	2.22641e-05	0.00167045	0.771324
02371366-65af-411b-bd8c-fa92ff52670b	f5c	uncalled4	1.46068e-05	0.00128282	0.775859
023760db-980b-47ba-b29a-f6ab55462bc9	f5c	uncalled4	2.26623e-05	0.00277948	0.772505
023761ea-f783-472c-ac82-4792f1952cea	f5c	uncalled4	1.80236e-05	0.00401639	0.771549
0237c1db-31d2-40cf-bc40-5c0dd721dde4	f5c	uncalled4	9.04084e-06	0.00204304	0.837811
023ae0eb-6e1f-41db-b63a-c9fd8a2cc0bb	f5c	uncalled4	0.000332439	0.155378	0.709054
023ca8a3-a802-418b-a24d-15013fb32148	f5c	uncalled4	1.82117e-05	0.00134432	0.789683
023ce174-61f7-439f-a604-fac37230be86	f5c	uncalled4	2.11957e-05	0.00335358	0.790748
023d188b-6c6b-4e2e-8b61-072c00b4ab9b	f5c	uncalled4	2.15287e-05	0.00891099	0.793568
023dacda-e58c-4377-a195-2dd279f9ce15	f5c	uncalled4	1.32383e-05	0.00122008	0.764173
023dc4fd-18b6-4b8b-81af-4eac6236cbe4	f5c	uncalled4	1.45668e-05	0.000759189	0.771214
023e1a56-4d97-4996-af80-e0fa1dec341f	f5c	uncalled4	6.96734e-05	0.0128562	0.781883
023e5736-4c6c-4396-b911-e4097e4f6983	f5c	uncalled4	1.45584e-05	0.00525681	0.751986
023fc854-075a-4275-a109-740c1050f9fc	f5c	uncalled4	1.27582e-05	0.00191982	0.781612
02419a5b-535f-483f-b575-a0b23f381445	f5c	uncalled4	1.04121e-05	0.00192793	0.769334
024226d2-fbf9-47c1-a258-d23f790f5c88	f5c	uncalled4	1.34603e-05	0.00209263	0.786674
0242ab4d-f678-497c-be01-7211ae895e65	f5c	uncalled4	3.38532e-05	0.00259584	0.739956
0242b6a0-2eb5-4747-96eb-b1586665d055	f5c	uncalled4	2.33478e-05	0.00208861	0.793668
0243f9df-a904-46f5-b753-cdb714574ecc	f5c	uncalled4	1.76466e-05	0.00139366	0.78216
0244424c-875f-402f-809e-ab753fcaa30c	f5c	uncalled4	1.12022e-05	0.002046	0.785977
0246899d-17f3-4f50-98ab-7ccd22dce614	f5c	uncalled4	1.22793e-05	0.00226865	0.802325
02472cb3-ee15-4469-9736-7d34e0dcac5d	f5c	uncalled4	0.000630935	0.236975	0.746234
0247bd12-f649-4b08-a339-741dea470ec5	f5c	uncalled4	1.14835e-05	0.000704252	0.777198
02484455-e4e7-43e7-bf12-46567a8fbe8a	f5c	uncalled4	2.1929e-05	0.00086784	0.793669
02493c86-9b48-4a19-aa0f-c61ae80d2754	f5c	uncalled4	2.4954e-05	0.00145145	0.794118
02499204-18ef-4f60-b813-863a888810e0	f5c	uncalled4	2.21685e-05	0.00373067	0.794542
024d1ae7-7307-48f6-9cf6-aad21cf527db	f5c	uncalled4	2.49117e-05	0.001821	0.728002
024d3cd2-90a5-42cd-a0e9-aa31c36e139a	f5c	uncalled4	1.33176e-05	0.00122839	0.795326
024efe21-a1ab-49b3-8a04-dd12a775eda9	f5c	uncalled4	2.23892e-05	0.0037756	0.783255
024fcd09-31bb-4980-946a-478c0cff35c5	f5c	uncalled4	1.51596e-05	0.00174162	0.786061
025054ff-7cc7-4505-aa0a-2c9313b79ab2	f5c	uncalled4	1.89961e-05	0.00355916	0.770889
0250ceb8-fec7-400e-bc10-815472ee7ab4	f5c	uncalled4	1.89617e-05	0.00252299	0.783893
025139e6-b7d3-44df-9ac1-73ffecd830f3	f5c	uncalled4	2.8895e-05	0.00444162	0.80061
025174ea-4b25-4cd9-9ce7-562c58b20953	f5c	uncalled4	1.21751e-05	0.000507501	0.754943
02523386-d9e3-407e-9aa7-ddc79ac9c731	f5c	uncalled4	1.28893e-05	0.00232599	0.778502
025349c6-cb9a-42a8-80c3-dc7ede97d873	f5c	uncalled4	1.97012e-05	0.00198761	0.780205
02551036-a741-43eb-82cc-e3ac4f9f2166	f5c	uncalled4	1.47492e-05	0.0066086	0.782793
0255e6ff-aa62-4cc2-a8be-4120af7313af	f5c	uncalled4	1.45705e-05	0.00272442	0.810484
025609c8-77fb-44dd-b614-bb6ebb06db4d	f5c	uncalled4	1.7952e-05	0.000822739	0.753267
0256a690-c1e2-4ed9-a145-ca5ae5abf2ac	f5c	uncalled4	2.17144e-05	0.00216672	0.730938
0256d266-863d-4642-b470-3075a918fd18	f5c	uncalled4	1.32766e-05	0.000791872	0.739226
0256fbff-cb91-4f45-b934-a1a28c9e370d	f5c	uncalled4	1.61832e-05	0.000825407	0.769734
025918fb-a87c-47cf-8a65-e554e809413a	f5c	uncalled4	1.4267e-05	0.00284694	0.789024
0259fb94-5f65-4eb0-a247-346fe7d47359	f5c	uncalled4	1.32494e-05	0.00514615	0.789416
025a1af4-d584-4c17-82f1-3373e1110a9f	f5c	uncalled4	1.90992e-05	0.00515079	0.777069
025aa371-2ba1-4567-ae71-bbd596bbd984	f5c	uncalled4	3.86579e-05	0.010978	0.788357
025b8a9b-587b-4a49-b6eb-3facc04a071c	f5c	uncalled4	1.57798e-05	0.00348909	0.795661
025bad2b-ecce-4c5a-8a9c-e27837ffa30c	f5c	uncalled4	2.77893e-05	0.00177555	0.771818
025ca0b3-5263-44f5-8583-12461a9a1a2c	f5c	uncalled4	1.9275e-05	0.00137385	0.773998
025deef5-d1b5-408e-a5d5-5f0a1ad76eec	f5c	uncalled4	1.99667e-05	0.00163675	0.780728
025e0329-8618-4872-9885-d547f6a5f70e	f5c	uncalled4	2.56772e-05	0.00157456	0.766884
025e7a0d-762b-4e4c-9809-b9758314ccc7	f5c	uncalled4	1.32108e-05	0.000789567	0.79386
025f3e5e-3921-4ce8-99b4-519a63344242	f5c	uncalled4	1.8319e-05	0.00110486	0.792794
0260c517-5ab3-42e4-b054-f843431049c7	f5c	uncalled4	1.76382e-05	0.00111054	0.713366
02612d0c-bbf5-44f7-9219-6c937d09b2a5	f5c	uncalled4
02618f3a-e5a8-4e82-b921-f961862602a4	f5c	uncalled4	1.20913e-05	0.00122902	0.780225
02630738-9872-4d84-ae48-42d06f216e39	f5c	uncalled4	2.1202e-05	0.0020388	0.764307
0265f939-b623-41ce-a56a-7feef5c89b5c	f5c	uncalled4	1.69835e-05	0.00212917	0.772139
02667b0b-59fd-4ddf-8d3c-ae963edecc78	f5c	uncalled4	1.63158e-05	0.00426343	0.788539
0266a669-a2d2-4a9c-86c6-8a9cfa41cb71	f5c	uncalled4	1.1587e-05	0.000671563	0.769991
02676c1f-c8a0-4ac2-85df-299cad56a4aa	f5c	uncalled4	1.31724e-05	0.00101697	0.767819
026770ce-57b6-4955-b7ac-222282daedd7	f5c	uncalled4	1.69579e-05	0.0032458	0.763211
0267dbf6-c78c-4c43-82db-913560835ec4	f5c	uncalled4	1.23617e-05	0.00168441	0.776242
026832f4-96fe-40f4-a56a-bb899a75ab6f	f5c	uncalled4	1.89814e-05	0.00121681	0.746113
026b7619-5a10-4aa6-b41e-0479ffd00bc5	f5c	uncalled4	1.30245e-05	0.000706309	0.788403
026b8e38-685a-4c67-b7f0-51caae07834e	f5c	uncalled4	4.35889e-05	0.0032392	0.710907
026c8975-19aa-40cd-af4f-ced93bb2070c	f5c	uncalled4	1.59795e-05	0.00241043	0.795937
026e1d15-ba58-4d50-bffd-4fdf733bb6ed	f5c	uncalled4	2.3123e-05	0.00781702	0.80597
026e3d20-3dff-4e35-8bcc-079667ffa3ae	f5c	uncalled4	1.26229e-05	0.00106304	0.780719
026f44c4-2740-4b96-aad9-90265bfb8729	f5c	uncalled4	1.2274e-05	0.00113865	0.781752
026f8eb7-9406-4136-ac9d-f555401c977f	f5c	uncalled4	2.00404e-05	0.000934905	0.782428
026ff9e9-7a9f-4f6e-ac5d-0c54bda091c2	f5c	uncalled4	1.34785e-05	0.000728923	0.776454
02702892-3902-4645-a161-34b65f500dc1	f5c	uncalled4	2.83476e-05	0.00215634	0.769329
0270e3b1-5652-4faf-b911-d10eb8303dd6	f5c	uncalled4	2.8804e-05	0.00175051	0.774178
027386f6-2f44-41e6-b4c3-d8e7c8dc41ca	f5c	uncalled4	1.78687e-05	0.00373516	0.780745
0275e0d3-bf03-407f-9495-ebbaaa17a624	f5c	uncalled4	1.36101e-05	0.000877208	0.787665
02762b4a-97d2-45f5-809e-7c3148abebd8	f5c	uncalled4	0.000486257	0.184633	0.441446
0276397a-d835-411b-87b3-898ab8b2bd2a	f5c	uncalled4	6.43602e-05	0.00248783	0.638186
02797e2b-c6c0-4365-90c8-464561f0f064	f5c	uncalled4	2.19034e-05	0.00138032	0.797404
0279b094-9e93-408c-9398-a6ce29cf2bc5	f5c	uncalled4	1.77374e-05	0.00205754	0.784848
027a0fad-8934-4eeb-8f5d-035c34e91809	f5c	uncalled4	2.74877e-05	0.00759468	0.770263
027a3118-dd97-42df-a2ee-9d6ce48d0b8e	f5c	uncalled4	2.20543e-05	0.00353481	0.76056
027a6b71-a783-4389-a832-1f0aec7aa1ff	f5c	uncalled4	1.50934e-05	0.00372572	0.725404
027a8218-ea03-4038-ab71-cc729a6b1499	f5c	uncalled4	1.00801e-05	0.000551784	0.783093
027bf381-8ad1-47c7-a42e-1d4c787205ce	f5c	uncalled4	3.52813e-05	0.00436213	0.761416
027c89b9-b8d4-440d-bc31-75b9b85b5660	f5c	uncalled4	3.47559e-05	0.00437171	0.765116
027d42bf-9f95-469f-8786-c4770f62c3c6	f5c	uncalled4	0.00100794	0.23011	0.655432
027d8a07-bb3c-487e-8734-8a7a117094d6	f5c	uncalled4	1.23244e-05	0.00462504	0.77959
027ea84b-c755-406e-8454-45aefcafec45	f5c	uncalled4	2.33534e-05	0.003995	0.781865
027efc31-25d2-4fee-b4f5-8f6d4f14af8d	f5c	uncalled4
027f12de-a4b4-4866-9ad8-0217738afa48	f5c	uncalled4	1.38479e-05	0.00274335	0.806008
027f646b-e6da-4d2b-80f4-1b36fdd770a2	f5c	uncalled4	1.6003e-05	0.00536885	0.764012
027f70f5-948a-49fc-bfb8-c162473c79e1	f5c	uncalled4	1.59557e-05	0.00155096	0.782927
028147d5-2659-4557-a076-8d700e8a467c	f5c	uncalled4	1.25489e-05	0.00287095	0.795244
0281757b-c689-4ccb-9c88-8f028e9c0dce	f5c	uncalled4	1.20569e-05	0.00301533	0.792166
02819200-2b36-4c57-9971-195d0788b67b	f5c	uncalled4	1.45284e-05	0.00299593	0.785506
028275b6-51b0-4ca0-8084-b51491b6c45f	f5c	uncalled4	1.90157e-05	0.00702561	0.785857
0282aa5e-28ee-413c-8443-aea8c732d496	f5c	uncalled4	2.58482e-05	0.00979107	0.775248
0282cc97-5f01-4cb0-91d5-1152cb56d87c	f5c	uncalled4	2.29796e-05	0.00885296	0.782719
028342eb-c32b-4e3c-9b34-1073d525ac64	f5c	uncalled4	2.0959e-05	0.000744486	0.795067
02835b1c-d805-4320-b0e6-89b20f89009a	f5c	uncalled4	1.77094e-05	0.0019631	0.754772
02843c2c-3409-4a80-a849-ce39cb2e8a15	f5c	uncalled4	1.50695e-05	0.00162728	0.85244
02849c84-372a-4c44-be8d-603c88c54846	f5c	uncalled4	3.35169e-05	0.00291659	0.748592
0284d29b-a414-4e08-aa59-83ee68963d6a	f5c	uncalled4	1.24268e-05	0.00251204	0.843025
02858be0-0a7e-42f2-bc1f-ad2ae879c005	f5c	uncalled4	1.11192e-05	0.000998871	0.789407
0285b35c-d487-43fd-aeda-8a8a96daa6f6	f5c	uncalled4	1.15135e-05	0.000648107	0.786721
0285cc4e-1fe3-4c07-b8d2-6d34e90e28c1	f5c	uncalled4	1.55114e-05	0.011782	0.796848
02871013-8669-4cf7-b915-b08c2848a75c	f5c	uncalled4	0.00576464	0.0478665	0.535735
0287dc25-247c-4ec1-abc1-7787d11b5107	f5c	uncalled4	1.96633e-05	0.00907292	0.724559
028876e5-05bf-40d2-9414-bfffb89398bc	f5c	uncalled4	2.19319e-05	0.00161328	0.804824
0288eafa-b3f2-4cd7-8e9d-fb6eb055e74e	f5c	uncalled4	1.65593e-05	0.0023514	0.786577
0288f17e-14ed-422e-8252-a09d36bf8880	f5c	uncalled4	0.00119025	0.0297367	0.668956
028a1999-0da1-4f5c-bbde-b205f6068039	f5c	uncalled4	2.64524e-05	0.0021397	0.736717
028ae688-23ff-4eea-ade8-b03b9db4728c	f5c	uncalled4	1.3261e-05	0.000694481	0.788943
028af17f-3eea-4802-82ec-67135da3851f	f5c	uncalled4	1.41954e-05	0.00137732	0.771979
028b9689-db7f-44c0-be24-806159a4374d	f5c	uncalled4	1.93393e-05	0.0034182	0.806468
028be308-9b04-4b6f-af89-986da6f50d39	f5c	uncalled4	2.11582e-05	0.00330478	0.778984
028c2b48-2fc8-425d-a9e5-a553a1de00b2	f5c	uncalled4	1.23559e-05	0.00201933	0.777208
028cf1a9-18a3-46e4-8599-e241dd5130c7	f5c	uncalled4	2.64007e-05	0.00198704	0.792164
028e0706-89ff-4fc5-befe-d9f6f6c975ac	f5c	uncalled4	2.4118e-05	0.00489885	0.770107
028f572c-dde0-4ed6-b7df-b3699cd0112e	f5c	uncalled4	9.5996e-06	0.000752631	0.787702
028f75ee-755f-4d2c-bd1f-07e0aaf708e0	f5c	uncalled4	2.25632e-05	0.00299796	0.794287
0290301e-b49b-4586-ad62-0eabf52d3b50	f5c	uncalled4	2.09948e-05	0.00231921	0.73993
0292fa3f-4a82-4956-9829-df3c24ebe5a4	f5c	uncalled4	1.40366e-05	0.00322651	0.770582
0294ad27-b7de-425e-8a96-37ada379b1c3	f5c	uncalled4	1.49036e-05	0.00233535	0.791935
0294f72e-31d7-41a8-aefd-c706d244ac3d	f5c	uncalled4	1.08453e-05	0.00273581	0.776686
0295e182-7feb-432a-88c7-d6d2cf32069f	f5c	uncalled4	9.47787e-06	0.000610854	0.793543
0295ebbe-df15-4212-aa23-7eca3e9a2706	f5c	uncalled4	0.0251877	0.0386125	0.000656756
0297712a-9a7f-4fa0-a8f3-7033c57e02dd	f5c	uncalled4	2.23808e-05	0.00655508	0.781029
0297cc18-baad-45aa-a81d-80abc8628c8d	f5c	uncalled4	9.60344e-06	0.000757636	0.795058
02988d8f-8d1b-427d-98f6-e3455ad3a131	f5c	uncalled4	0.000461709	0.157102	0.778845
02991b16-5243-440d-9ff2-c6895f852481	f5c	uncalled4	1.29405e-05	0.00122142	0.79321
02995c2e-5bc2-427d-bf6c-112dfebf93bf	f5c	uncalled4	0.000239942	0.0132633	0.741273
029980fb-1093-43a0-8a2b-1923404d1a98	f5c	uncalled4	3.30336e-05	0.00332636	0.766495
029a9594-b1bd-4e16-a081-2171bbfdb809	f5c	uncalled4	1.98905e-05	0.000997052	0.779748
029b5bb9-65ef-496f-97d3-81fd0f779efc	f5c	uncalled4	1.29872e-05	0.00123434	0.789289
029b8fac-bbf3-479b-9107-e727e65dad74	f5c	uncalled4	1.07738e-05	0.000761113	0.790033
029e0e6f-6933-4aed-a5ee-1e00d73d214b	f5c	uncalled4	1.28644e-05	0.000693777	0.786147
029fc465-043c-4c91-93e8-3a2037d4cda1	f5c	uncalled4	2.02511e-05	0.00146248	0.792556
02a05dfd-6a63-48fa-872a-fc79d809ed63	f5c	uncalled4	1.17039e-05	0.000993078	0.786094
02a3a0c0-8fb8-4c6e-b49d-7d254a933ccf	f5c	uncalled4	1.61187e-05	0.00104941	0.770071
02a3b000-6262-4e93-bee7-5ac068df53c2	f5c	uncalled4	0.000376908	0.0182068	0.746739
02a416fd-a5a3-4233-a567-6d287918516f	f5c	uncalled4	1.62078e-05	0.00149024	0.782245
02a464e7-c729-4e73-967c-84afae7503c2	f5c	uncalled4	1.37449e-05	0.00078106	0.774264
02a6408f-92bc-4261-9a6d-1ea8dfd25a49	f5c	uncalled4	1.60977e-05	0.0018073	0.77256
02a68020-0a83-4c6a-86f0-3d8da580ae33	f5c	uncalled4
02a6ced7-e21a-4945-a3c7-3e743f2f11f0	f5c	uncalled4	2.82445e-05	0.00680499	0.773509
02a73604-3cf5-478f-8402-f3d644b1486b	f5c	uncalled4	2.00589e-05	0.00554443	0.78734
02a7670d-23ff-4654-a753-b0e5020045cd	f5c	uncalled4	0.00147021	0.0238427	0.692222
02a86417-85fb-4563-bb3b-69a008b57516	f5c	uncalled4	2.19564e-05	0.00114177	0.755369
02a88a2c-5c0d-4fd0-90d4-a948b9134e5c	f5c	uncalled4	1.61651e-05	0.000914307	0.730603
02a94337-d423-4e21-961f-b4d409c44066	f5c	uncalled4
02aa2b37-ef56-4302-9ebc-ce650ae47734	f5c	uncalled4	2.58259e-05	0.00190177	0.772013
02aa349b-4955-43dc-8236-577d749b0efa	f5c	uncalled4	2.07131e-05	0.00284862	0.777299
02aa4bc6-5703-4bfd-a92a-ea1cdb6be5fb	f5c	uncalled4	1.37107e-05	0.00134231	0.758032
02aaa27e-d043-4654-a6c8-499fe7451f19	f5c	uncalled4	1.59524e-05	0.0010673	0.772637
02acaed5-b1e6-454d-9ceb-835f0a64df67	f5c	uncalled4	1.88209e-05	0.00103302	0.779537
02ad4458-0600-48d8-8947-9e4503823953	f5c	uncalled4
02ade40c-4ebc-4d9b-bca6-032fdb80e9ca	f5c	uncalled4	2.23384e-05	0.00354937	0.771017
02ae5f12-de1b-4820-bb7d-ec179162fbee	f5c	uncalled4	1.80957e-05	0.00280044	0.732485
02af4eea-c2ec-4ea9-bf0b-bd8c38ffec75	f5c	uncalled4	1.20354e-05	0.0012674	0.784194
02b1490a-4844-4c06-9fa9-ef24f04cd8fd	f5c	uncalled4	1.08046e-05	0.00129137	0.775666
02b1bed0-1e15-4007-9a51-55415e563fb6	f5c	uncalled4	9.89004e-06	0.0011218	0.782387
02b28791-1941-4148-a3f5-398099139f1f	f5c	uncalled4	1.7764e-05	0.00139117	0.787471
02b2e13a-2035-446a-8d4f-63f55f91fb1c	f5c	uncalled4	1.24647e-05	0.000596627	0.794041
02b3014a-84e4-427c-bad9-81e85a38dd75	f5c	uncalled4	0.000624232	0.218405	0.777328
02b47475-08cf-4351-8449-906bb3bc1487	f5c	uncalled4	1.9217e-05	0.00403839	0.741265
02b47862-ee71-45cf-8de0-2785dfd61dcb	f5c	uncalled4	3.15291e-05	0.0063262	0.783215
02b4b402-c76c-48a8-bd05-269ac0ae6591	f5c	uncalled4	1.13858e-05	0.00204411	0.788299
02b612e4-7282-4384-92bd-b3a748bacaad	f5c	uncalled4	2.27693e-05	0.00779063	0.756894
02b632f5-a8c8-4417-94fb-e9ead005dae4	f5c	uncalled4	2.41548e-05	0.00286995	0.775581
02b65607-3881-4939-a690-e4985c6c3cb2	f5c	uncalled4	1.21484e-05	0.00200804	0.767502
02b6b3ee-07e5-4ecf-b18b-2cea0f97f539	f5c	uncalled4	4.83525e-05	0.00817337	0.754378
02b6b7e9-4786-4180-97ad-b5aaf89ac4ce	f5c	uncalled4	1.16562e-05	0.00120847	0.78789
02b71aa0-55f5-4210-89c3-c45d27b93cba	f5c	uncalled4	1.81251e-05	0.00171677	0.761726
02b74be0-0878-4b65-b9e3-f0b2ed378c14	f5c	uncalled4	1.70543e-05	0.00454228	0.780808
02b86ec9-c964-4698-b930-41747951a4ed	f5c	uncalled4	1.04172e-05	0.00174112	0.778557
02b8baf0-032b-4137-9644-236951a69682	f5c	uncalled4	1.69614e-05	0.00147898	0.761604
02b98537-392b-4472-82c4-b35f74fa6010	f5c	uncalled4	4.16064e-05	0.00417946	0.675323
02b9cd95-78c4-4791-a10a-3be4bff18510	f5c	uncalled4	3.22523e-05	0.00535174	0.771779
02b9ec23-f188-4889-9338-1db64fdb325b	f5c	uncalled4	2.24864e-05	0.00155782	0.699172
02bc3886-e805-4ebb-b1c9-e00ea648cc4c	f5c	uncalled4	1.18097e-05	0.0013279	0.799146
02bc76d8-11dc-4ee8-845a-a371c97cb180	f5c	uncalled4	1.36938e-05	0.00154618	0.78946
02bca5cb-4b2c-4f68-b382-40f062e35863	f5c	uncalled4	1.60851e-05	0.00173506	0.783981
02bce372-417f-4c57-b39e-a11790d3e648	f5c	uncalled4	2.14787e-05	0.00242473	0.783436
02bd0f56-bf0b-482a-a8c6-61b1a7b1a3b9	f5c	uncalled4	1.25911e-05	0.00776543	0.795846
02bd2c6a-6d6b-4555-865a-559f95eccca9	f5c	uncalled4	1.46324e-05	0.002021	0.777757
02be45f7-25a6-4cbd-8100-a1dab6ff2ed1	f5c	uncalled4	1.85886e-05	0.00420894	0.783577
02be5a80-e870-4b23-9469-7b4c0fd0dacd	f5c	uncalled4	2.45322e-05	0.00456922	0.771854
02be69ae-81f8-43b5-8984-7fad0881daf3	f5c	uncalled4	1.25335e-05	0.00223852	0.775269
02be7bbf-302c-42fa-ac56-c8b73d57cbfa	f5c	uncalled4	1.45554e-05	0.00193293	0.771765
02beb02e-a88a-4d80-88a7-c5538d1a0ea7	f5c	uncalled4	1.21797e-05	0.00199965	0.835072
02bf1984-7679-4699-99f7-814eb41ef451	f5c	uncalled4	2.3208e-05	0.00192341	0.788423
02c08547-0c21-4f94-a871-d71b85e283a7	f5c	uncalled4
02c0c8b9-18be-408e-8376-e3843bd0506f	f5c	uncalled4	1.06704e-05	0.000660001	0.78339
02c28857-2794-4836-b90c-c25f25dda414	f5c	uncalled4	2.04648e-05	0.00219632	0.792877
02c33681-2784-43c8-a43c-cc051ec4d5f8	f5c	uncalled4			0.615324
02c36ba7-d892-4cbe-9e4b-e1d4edf62ca9	f5c	uncalled4	2.04868e-05	0.00108412	0.772348
02c3ccc7-0a99-4ffd-8d17-09f58a7d35d5	f5c	uncalled4	0.000473936	0.133126	0.772649
02c3e817-780b-4431-bf85-a7d8a2fbf985	f5c	uncalled4	6.1576e-05	0.0116675	0.76607
02c4a64f-3291-414f-b2bf-c346b600c170	f5c	uncalled4	1.14324e-05	0.00105573	0.765564
02c64161-d1fb-451e-b50f-1de35ee84fa8	f5c	uncalled4	1.27663e-05	0.00304414	0.783835
02c664e0-7529-458d-a0d6-5243e5ecd19c	f5c	uncalled4	1.91082e-05	0.0011117	0.726079
02c67b15-4ec1-4d0a-b985-a9e85a1b7c78	f5c	uncalled4	1.97697e-05	0.00451464	0.786776
02c794cd-fdd7-4bc0-a2bc-9989878bd037	f5c	uncalled4	1.45453e-05	0.000773415	0.79356
02c81a4b-355e-4255-b308-8ae817a778c8	f5c	uncalled4	1.39749e-05	0.00528837	0.788899
02c8c6e6-f29e-4f67-ba67-388adcec4dcb	f5c	uncalled4	3.43278e-05	0.0040433	0.721574
02c901be-fa43-45ec-97d6-5dadd5aa4eaf	f5c	uncalled4	1.08173e-05	0.00275983	0.788978
02c95555-aa34-4503-b094-ffe6d3690a7d	f5c	uncalled4	1.2713e-05	0.00243248	0.77473
02c9676f-2238-4fb8-b9df-ad565dc80161	f5c	uncalled4	1.22615e-05	0.00434555	0.779809
02c97b93-2076-4f7a-90c4-d58c856d8d3f	f5c	uncalled4	1.44013e-05	0.00101502	0.799658
02c9d2ae-4d95-424c-a9e5-a6028ce2d4ea	f5c	uncalled4	1.58946e-05	0.00557364	0.822563
02ca388f-3be8-46a5-ad47-262706a2bb36	f5c	uncalled4
02ca7661-fa00-47e7-9c7a-815644c074a8	f5c	uncalled4	1.17556e-05	0.00632585	0.787581
02cb192f-e54d-4599-bc8a-bd2c928c25c9	f5c	uncalled4	9.91468e-06	0.00151249	0.787424
02cb7bdf-32af-4081-b23e-604f147c9706	f5c	uncalled4	1.15554e-05	0.00150424	0.775473
02cbac81-c6f7-4d42-b04c-a340bf7531c8	f5c	uncalled4	2.00218e-05	0.00300113	0.797654
02cc3f73-29a8-49f2-8001-36d9da5faeaa	f5c	uncalled4	1.38398e-05	0.00360923	0.798562
02cde6b7-805f-4752-922e-6b9a7075db27	f5c	uncalled4	1.33649e-05	0.00172454	0.80926
02ce1681-e185-477f-83ab-c18ee64a7c03	f5c	uncalled4	2.37447e-05	0.00194503	0.777353
02cf07b1-fdd0-4b6a-9dd8-bd4764542454	f5c	uncalled4
02cf1c76-a699-4c01-9e31-19fe8cb00dbe	f5c	uncalled4	1.41525e-05	0.00658573	0.798698
02d051e1-d1ae-4879-aa02-7f1135c26601	f5c	uncalled4	1.54087e-05	0.00106384	0.761338
02d1377d-6fc1-4cf3-ac3f-088ee81d71a1	f5c	uncalled4	1.37614e-05	0.00291134	0.75654
02d1c6af-7f30-47f5-be03-9c3384b0e714	f5c	uncalled4	1.16139e-05	0.000839958	0.79383
02d30ae2-824a-41df-81f8-091337e46769	f5c	uncalled4	1.61991e-05	0.00550282	0.782833
02d35dae-cb81-4172-9ef1-f9a9ee07f15c	f5c	uncalled4	1.39593e-05	0.00236162	0.770007
02d3f54a-7694-4f84-8437-2bdebbcc71e2	f5c	uncalled4	2.17788e-05	0.00374951	0.765265
02d47277-5ef1-4542-8077-29cd36778697	f5c	uncalled4	1.14253e-05	0.00190055	0.793348
02d549d8-b830-4e0d-9d36-33f87809e8ce	f5c	uncalled4	1.13494e-05	0.00104912	0.797792
02d73388-8f16-4170-8370-909f536ea568	f5c	uncalled4	2.24355e-05	0.00327253	0.776114
02d75bad-106d-41ab-a952-d83423ce731e	f5c	uncalled4	1.11472e-05	0.00111459	0.78104
02d75f29-a32d-4e76-9acf-01e7ccaf3848	f5c	uncalled4	1.51189e-05	0.000993249	0.787981
02d8564a-1136-4e96-94c7-c9c7031d652a	f5c	uncalled4	1.00504e-05	0.00145228	0.792296
02d8a043-a134-4825-b8fc-0cd97dbfe07e	f5c	uncalled4	1.62898e-05	0.00204367	0.772683
02d9e632-56cd-4bac-a7f0-fb044889dd36	f5c	uncalled4	1.29338e-05	0.000581195	0.777564
02da15e5-3255-4209-be24-370d97ace81c	f5c	uncalled4	1.39041e-05	0.00102954	0.767536
02da2950-0234-4eeb-bc26-2fa5a898929e	f5c	uncalled4	9.13099e-06	0.00230415	0.790355
02da6986-eae1-4337-af9d-1fd5706e5d9c	f5c	uncalled4	4.08756e-05	0.00736623	0.779588
02dae0e7-7fea-4f13-ba90-a7b6ab7bd01a	f5c	uncalled4	1.35237e-05	0.00210265	0.786372
02dc3c2c-da58-4f20-9b8e-131ab4fa6618	f5c	uncalled4
02dcc8f2-b867-437e-9e9f-cd8ac9cec680	f5c	uncalled4	1.96756e-05	0.00320888	0.804272
02dddd27-5357-4414-81a9-ebe826a9130d	f5c	uncalled4	1.34868e-05	0.00123351	0.790847
02ddf709-a35c-4984-ac74-2c0a6d610b24	f5c	uncalled4	2.20859e-05	0.00144525	0.772456
02de631b-eb99-49d6-9a67-4e8b29891e9a	f5c	uncalled4	1.07971e-05	0.00234384	0.790645
02deacba-3f0e-4c73-88b9-3774415a17bc	f5c	uncalled4	1.10828e-05	0.00190234	0.769367
02ded0c2-5f5d-4ed3-ade4-0b127f6e7192	f5c	uncalled4	2.54488e-05	0.00595986	0.789301
02df0cae-0aec-4d77-988a-bb148c8ae701	f5c	uncalled4	1.80534e-05	0.00266235	0.789589
02dffa72-6895-4d84-91f4-beee21306471	f5c	uncalled4	0.00121285	0.0124031	0.679135
02e00bcb-e866-48b3-9825-6cba09487298	f5c	uncalled4	0.00588871	0.0922901	0.696415
02e02bab-2f79-4282-a83c-c1d0fc364ec1	f5c	uncalled4	1.1254e-05	0.000853767	0.788639
02e11045-8f3a-4a11-b598-0a9994c472e0	f5c	uncalled4	1.60142e-05	0.00139912	0.786348
02e15348-56c0-4c1f-8806-1d7cc52cca92	f5c	uncalled4	1.58415e-05	0.00125268	0.775836
02e1c460-ec90-4110-b6dd-d0a6ab015a42	f5c	uncalled4	1.19582e-05	0.000748213	0.778312
02e1f8f7-a331-42bb-91a5-d5debf3a8b35	f5c	uncalled4	1.3573e-05	0.000941608	0.756865
02e2389d-f137-416f-b50e-4168c34ea467	f5c	uncalled4	1.91889e-05	0.00120682	0.739134
02e249ce-4a14-4ca4-94a1-197426cfa78b	f5c	uncalled4	1.39028e-05	0.00108004	0.793272
02e2f776-dd74-41d7-8cb4-0ed895280b74	f5c	uncalled4	3.67592e-05	0.00561319	0.794362
02e2fb55-a663-42b5-9b25-77382c77cbc9	f5c	uncalled4	1.79844e-05	0.00403439	0.785983
02e312d9-6c73-4499-869a-6af64b70b88b	f5c	uncalled4	7.03685e-06	0.00187016	0.860326
02e388ff-e3eb-4560-80b5-f274a242f071	f5c	uncalled4	1.72954e-05	0.00492193	0.778065
02e38df7-f59d-4702-8666-b1627778dfe3	f5c	uncalled4	1.89806e-05	0.000976852	0.809353
02e427e7-b27c-4be0-a987-e26a54e2d26b	f5c	uncalled4	1.43787e-05	0.00105711	0.782228
02e43932-4f3b-4b79-b4bb-238028e61efb	f5c	uncalled4	2.81133e-05	0.00627997	0.785487
02e47e5f-91af-4587-a372-8ef9aef9576f	f5c	uncalled4	1.59076e-05	0.00140429	0.758827
02e4c6fb-3923-4f4a-bab1-f611ad5ddcd9	f5c	uncalled4	1.10535e-05	0.000866972	0.78124
02e6c6d6-e080-4df5-8d23-d2ea10825ccf	f5c	uncalled4	2.44737e-05	0.00122716	0.800859
02e8b112-50f5-4e77-91ea-83badbe6ae7a	f5c	uncalled4	2.89061e-05	0.00387534	0.788314
02e904fd-2389-47ad-97d0-1ed685de3dc9	f5c	uncalled4	0.000557314	0.26877	0.498992
02e94ee1-e77f-431f-a969-401422a36855	f5c	uncalled4	1.23411e-05	0.00454168	0.788921
02e981b0-3734-4752-bc31-ee26c2c6f7d1	f5c	uncalled4	1.50931e-05	0.00102116	0.772586
02e9d6e2-66e3-4dfc-a794-e3fb66a685cf	f5c	uncalled4	1.2768e-05	0.00235902	0.767475
02ea9adc-d695-4387-8d3a-beb4a0d53fa1	f5c	uncalled4
02eae106-8803-44d5-8485-08a296ac5fc9	f5c	uncalled4	2.52011e-05	0.00102066	0.770529
02eb88f4-f220-453a-8cba-8bbd553add4f	f5c	uncalled4	1.65256e-05	0.00103735	0.746138
02eb8acb-ddb9-437e-b85c-ac4c94796154	f5c	uncalled4	1.08871e-05	0.00117149	0.771217
02eb9c7e-180c-4489-a488-378b91d4e645	f5c	uncalled4	0.00102078	0.0463099	0.700573
02ec605e-2b6e-4048-8986-5c7b104fa8be	f5c	uncalled4
02ec985b-9deb-47c1-8582-e025e343961f	f5c	uncalled4	3.18117e-05	0.00115154	0.756582
02ee5b8d-186c-46a9-959a-0c178b33a6b8	f5c	uncalled4	1.10398e-05	0.000844599	0.77453
02ee9da3-1943-4a6f-93fb-7ba4d8609ba2	f5c	uncalled4	1.51262e-05	0.0039684	0.765892
02ef2a84-a3a2-4171-a715-353120f87cfc	f5c	uncalled4
02f0c0a3-037d-4fbc-a169-5953854b34c1	f5c	uncalled4	1.75411e-05	0.00163804	0.776678
02f11ea7-f59a-449c-a4a2-3017f2f23bc1	f5c	uncalled4	2.19587e-05	0.00206962	0.751431
02f1663d-dbc3-4efe-b26c-46b675b572c3	f5c	uncalled4	1.90847e-05	0.00136141	0.776488
02f77453-51e4-4b0e-9600-82e2b5c9cd54	f5c	uncalled4	1.42279e-05	0.0055187	0.788023
02f799a0-6c63-42bc-ba4b-aa5a7c672c74	f5c	uncalled4	0.0244118	0.218531	0.494821
02f91f0e-9a4c-41c6-8849-18bbed38f248	f5c	uncalled4	1.453e-05	0.000652819	0.761641
02f92b25-f325-40eb-942f-a33d997874fb	f5c	uncalled4	1.92252e-05	0.00191159	0.776358
02f95ec4-c21e-45ea-9513-99d9d9aa32eb	f5c	uncalled4	1.52675e-05	0.00383078	0.771179
02f9da57-eafa-4a5c-8bfe-498560f3b73f	f5c	uncalled4	1.64679e-05	0.00125783	0.773607
02fa0eb2-b419-4594-b4fc-1d91edd59a54	f5c	uncalled4	1.4585e-05	0.00121521	0.79743
02fa1837-1d5b-44fa-898e-8e5bf98c576a	f5c	uncalled4	3.34575e-05	0.00738868	0.777899
02fac226-6178-49d2-a5c1-693804ac163e	f5c	uncalled4	1.56048e-05	0.00393967	0.718153
02fc22e3-9827-42ac-826e-00e2ef6bc5c7	f5c	uncalled4	3.40403e-05	0.00574046	0.763659
02fc81de-9cf1-4a8a-a8bc-4de5f8286005	f5c	uncalled4	1.08028e-05	0.000786307	0.790209
02fd16a1-40e9-4900-a8df-33ce4e8b856d	f5c	uncalled4	1.1397e-05	0.000896209	0.787199
02fd86b2-3938-49c4-983b-6716a05578dc	f5c	uncalled4	2.05027e-05	0.00141692	0.796313
02fe5559-a4fc-44c0-82e7-d84d8adda183	f5c	uncalled4
02fe95b0-b4d5-4337-a1ce-aca042564a9c	f5c	uncalled4	1.32423e-05	0.00143123	0.783044
02fed0f9-23e1-4add-9dd8-3044351f348b	f5c	uncalled4	3.13314e-05	0.00629509	0.772855
02fff308-701d-44c1-9b2e-23be557189ed	f5c	uncalled4	1.7807e-05	0.0014783	0.788363
030015ee-15b1-4c76-86af-95446f7aee19	f5c	uncalled4	2.22251e-05	0.00182903	0.801071
030082d0-14b9-46ea-bf4b-de357962a2e3	f5c	uncalled4	2.50409e-05	0.00944979	0.788105
03017b30-d36a-4182-9980-e84a6f2a6b63	f5c	uncalled4	1.22511e-05	0.00233402	0.777403
0301b6c4-74e1-4b98-9ef7-c5d2002467f3	f5c	uncalled4	1.01324e-05	0.00236229	0.786674
0302d4d3-f1bf-4e4d-bee5-e754b9242e2e	f5c	uncalled4	0.000540431	0.195204	0.638095
03037719-3fe5-4e59-9ab4-8dd8159c6eff	f5c	uncalled4	1.10522e-05	0.00144043	0.783527
03038222-072e-482e-9cc4-27deec00b2ab	f5c	uncalled4	1.98611e-05	0.000775927	0.768776
03038d0a-a69d-4dc0-bf65-dee109396e12	f5c	uncalled4	8.48853e-05	0.00696663	0.759219
030691e1-88b6-45b5-9560-2b8dabfc8bab	f5c	uncalled4	1.31664e-05	0.00225516	0.7601
0306d779-ec90-4361-a4f0-0460aaf0d9fd	f5c	uncalled4	9.81109e-06	0.00079176	0.777403
030723ae-f0c1-4a9c-a958-ba484669555c	f5c	uncalled4	2.81021e-05	0.00130054	0.773242
0307455d-fd7c-4da9-8f9c-c4362c96bd81	f5c	uncalled4	2.38053e-05	0.00247284	0.794538
03074569-7a28-4057-bf5e-8e57c1c263bb	f5c	uncalled4	2.38896e-05	0.001543	0.76903
0307e1a8-6176-47f4-a689-bd40a945b5f3	f5c	uncalled4	1.97239e-05	0.0018389	0.776581
0308f489-58af-47f3-a468-9b490540a289	f5c	uncalled4	1.45874e-05	0.00323636	0.778061
03091467-74a9-4898-80fd-d31fcc6fe742	f5c	uncalled4	1.91495e-05	0.00415835	0.794157
0309cd3e-ca1b-4733-9616-49b994377505	f5c	uncalled4	1.98874e-05	0.00202717	0.785456
030a563f-42e7-476a-8194-313eaa16b42e	f5c	uncalled4	1.40995e-05	0.00159024	0.77761
030b3d94-3a02-4d90-b854-bd28cdb90e24	f5c	uncalled4	1.65714e-05	0.000797775	0.746892
030ccfd2-1561-45a0-b13b-a82790dd3d71	f5c	uncalled4	2.33155e-05	0.00127133	0.767779
030db6a9-bf75-4ede-a748-60a995d149ed	f5c	uncalled4	1.47569e-05	0.0038546	0.798663
030dbf45-6b4c-405e-b4e2-090fd6d85f47	f5c	uncalled4	1.80523e-05	0.00285865	0.771332
030e9c69-93f8-4510-acf7-9999e5a9b401	f5c	uncalled4	1.27086e-05	0.002252	0.772674
030ff0d2-6f60-435d-8005-770be3f31df3	f5c	uncalled4	1.67607e-05	0.00439325	0.773745
031034d7-cf91-4aed-a9fa-e8cd6f42130c	f5c	uncalled4	3.00881e-05	0.00326534	0.77959
03104d0f-e02c-422f-bb21-11c77b289167	f5c	uncalled4	1.42627e-05	0.00259918	0.771929
03109ff3-323f-4ca7-afc1-a1bb5ecc8767	f5c	uncalled4	5.55704e-05	0.00165657	0.630614
0310d3c0-fa65-4205-9972-1ed9f5d3f32c	f5c	uncalled4
0311ac15-e492-41d7-86a1-4c788acb0544	f5c	uncalled4	1.97888e-05	0.00208831	0.77454
0311aeca-98d0-4012-b1e4-112e79fda37a	f5c	uncalled4	1.76977e-05	0.00135375	0.78424
03120328-70bb-4373-83cb-15aa198304c8	f5c	uncalled4	1.20486e-05	0.000844143	0.77104
031221bb-8b89-4bcf-950a-0efee04f9fbd	f5c	uncalled4	2.59033e-05	0.00500984	0.740181
03126279-7de1-4781-9704-62206595a411	f5c	uncalled4	2.82611e-05	0.0030292	0.759241
0312d65c-46ca-4736-bba4-975becce92da	f5c	uncalled4	1.11387e-05	0.000538171	0.79046
0312e710-5328-4e35-9dce-e4a1e652db1e	f5c	uncalled4	1.19377e-05	0.000655594	0.812882
031394de-091d-48ed-b423-ade47e71401b	f5c	uncalled4	1.36541e-05	0.000780457	0.780716
03145108-b575-473d-9b6c-6b76d053cc12	f5c	uncalled4	1.87307e-05	0.00300615	0.780751
03152a45-8550-4d12-baa3-cbeb5497c5e1	f5c	uncalled4	1.05137e-05	0.00234961	0.790524
03157bca-df85-4491-82fa-7e11e002d88c	f5c	uncalled4	1.27822e-05	0.00434448	0.793866
031655e4-4ef2-4272-8b6e-b49772d6185f	f5c	uncalled4	1.97687e-05	0.0034086	0.782557
0317313d-4935-44f1-9c80-d36727a8d046	f5c	uncalled4	1.18827e-05	0.00499292	0.793656
03176c1d-728d-4acc-9d88-e00ccee44ec6	f5c	uncalled4	1.5316e-05	0.00226152	0.765431
03185d5d-3841-4e6b-9f23-80a68faa33f4	f5c	uncalled4	2.32814e-05	0.0112746	0.762416
031b2200-462e-497e-a92f-75deb83391a8	f5c	uncalled4	9.5409e-06	0.00272888	0.808064
031b3660-4704-4dcb-98b4-27dca4470184	f5c	uncalled4	2.02802e-05	0.00178493	0.778745
031c4814-a409-40cc-99b2-03a7b469d45e	f5c	uncalled4	1.07895e-05	0.00123794	0.780722
031d1b11-e500-483e-a998-1f800e7f1f47	f5c	uncalled4	2.17734e-05	0.00178482	0.777558
031da0fa-de20-4f1b-b191-bc47aff0ab9c	f5c	uncalled4	1.10985e-05	0.00247402	0.790726
031e0972-7974-469b-bbd2-b7bd6ec2b504	f5c	uncalled4	1.05487e-05	0.000699374	0.794757
031f1407-29cf-450f-86b7-259f876c1b7f	f5c	uncalled4	2.43139e-05	0.00377181	0.785121
031f2325-9ead-4e70-8a43-40d37453e237	f5c	uncalled4	3.14454e-05	0.00393945	0.783089
0320152d-96ab-447b-a22b-bf8529c24310	f5c	uncalled4	3.41853e-05	0.00306218	0.770401
03201cf9-a9fe-429e-ad3d-4c81113b69ac	f5c	uncalled4	9.8203e-06	0.00113256	0.781504
0320e30a-2e18-43dd-a8c6-7fd02e81e757	f5c	uncalled4	1.83168e-05	0.0037392	0.774668
03214cc2-d90e-4897-92db-6f6d4c958418	f5c	uncalled4	2.70124e-05	0.00461198	0.769038
032179cc-1c39-4c30-9ed9-8fc56de96e60	f5c	uncalled4	1.72484e-05	0.00220224	0.792108
03220861-89c3-473d-ab22-962e37068db3	f5c	uncalled4
03233ba4-6e55-45e3-aa66-dfca1cdf1474	f5c	uncalled4	1.21539e-05	0.00161099	0.751447
0323803a-f581-41b9-b399-6fb0e9fe7441	f5c	uncalled4	1.30692e-05	0.0024554	0.758243
032404ee-de35-423e-9363-6c7f8854832d	f5c	uncalled4	2.03842e-05	0.00427062	0.793431
03240ef5-92e9-482f-acba-4c7234898f93	f5c	uncalled4
0324710c-9d09-430b-b63a-51d0219ebffd	f5c	uncalled4	1.38483e-05	0.00392885	0.776639
0324baca-4801-4eb0-a48c-513dd0b13165	f5c	uncalled4	1.08347e-05	0.00380716	0.763183
03251746-ee65-46f2-b7e3-1dcace40a780	f5c	uncalled4	1.2125e-05	0.00184358	0.779559
0326d4a1-4f1a-4ab4-8fa2-85da002446bf	f5c	uncalled4	9.96973e-06	0.000719604	0.784754
0327fed8-40b6-43d9-acf7-6d3854ff8be0	f5c	uncalled4	1.87695e-05	0.00191264	0.773519
032802ba-d4ea-48a7-aadf-43aab28a4b5e	f5c	uncalled4	0.0305321	0.199441	0.507051
032896a1-3e2a-4eed-b16e-2bc6735b2a45	f5c	uncalled4	1.37094e-05	0.00238171	0.792155
0328d20b-65bc-4601-957b-c25e2101cd5b	f5c	uncalled4	1.29051e-05	0.00354286	0.780603
03290ce1-d2c9-4915-8dca-e24bac5635e2	f5c	uncalled4	0.000144568	0.0197514	0.778187
032a4542-f762-44a5-802a-e5b022554a87	f5c	uncalled4	1.15362e-05	0.000689898	0.796882
032a71bc-9e5f-471d-80f9-db7cc3064b08	f5c	uncalled4	3.59814e-05	0.00181889	0.754503
032aa142-6f7f-4791-ad3a-455cce6aba4d	f5c	uncalled4	3.18917e-05	0.00209626	0.767671
032adc36-3493-40d1-bacd-a92f1cb8006c	f5c	uncalled4	2.66925e-05	0.00416159	0.788619
032af7ff-0efe-491a-8da2-e48cc598646d	f5c	uncalled4
032c6ab4-699e-4f9b-8be0-5d1b552bf5a7	f5c	uncalled4	1.07594e-05	0.000998395	0.794293
032d0ecb-2a41-43c0-85dd-e6f48f403115	f5c	uncalled4	2.0894e-05	0.00592753	0.757652
032d7da0-9326-4526-be8b-04e4ee35610c	f5c	uncalled4	1.65657e-05	0.00344502	0.782283
032e01a3-64a6-4579-bb24-f2b0ba6c89a8	f5c	uncalled4	1.72108e-05	0.00603818	0.779656
032e9073-c401-4671-96b8-9e08c7edd8de	f5c	uncalled4	1.51071e-05	0.00222272	0.781319
032fc9ed-69d4-4030-9167-10effc3d9365	f5c	uncalled4	2.46629e-05	0.00157578	0.686129
03308540-a36a-48f1-a396-78f46af34a1c	f5c	uncalled4	1.16501e-05	0.00164353	0.797943
0330cfde-6bc2-454b-b7df-21a08ee2861f	f5c	uncalled4	1.85221e-05	0.0007293	0.788914
033259a9-465f-40d9-92b9-97995e78c7aa	f5c	uncalled4	1.12576e-05	0.00174232	0.78246
03331f99-d3fc-44e9-9cde-39150ebbaaf1	f5c	uncalled4	2.53979e-05	0.00424239	0.771715
03332850-a36a-4e79-ba8e-f356cbacafd7	f5c	uncalled4	1.58967e-05	0.000663302	0.790983
033345a8-8ab9-4f0c-9eb0-6509164b1def	f5c	uncalled4	1.42317e-05	0.00132207	0.799911
033702eb-4f19-454b-8026-930f5814cbd7	f5c	uncalled4	3.85018e-05	0.00779641	0.773592
0337b90c-dff3-4b2a-878a-a6e7237cd858	f5c	uncalled4	1.06118e-05	0.00190359	0.794621
03382ba6-6f7b-4a4d-8201-117f2ad13ef0	f5c	uncalled4	2.38258e-05	0.00164481	0.775535
03388d17-38f9-4afb-b10b-0d3f73cf2daf	f5c	uncalled4	1.43022e-05	0.000798718	0.780616
03395333-ab8d-4674-8273-89c9333742eb	f5c	uncalled4	3.54795e-05	0.00688351	0.775069
03396fd0-b7fa-40e5-98a8-94c87c7a2a87	f5c	uncalled4	1.73479e-05	0.00172845	0.772517
03396fe4-b33b-421b-8692-8930a3abbeb6	f5c	uncalled4	2.67334e-05	0.00116692	0.775565
033ab54a-7775-4525-b8f8-43663bf221d2	f5c	uncalled4	1.16325e-05	0.000906999	0.776303
033b93de-304a-49bc-8172-83acc59e4c36	f5c	uncalled4	2.05123e-05	0.00378137	0.784177
033eb0b1-371e-45df-815c-6a8bb0a92ccf	f5c	uncalled4	1.43362e-05	0.00117266	0.769523
033ebc06-f80e-4dc5-a0e3-83e987a4c2fa	f5c	uncalled4	1.70161e-05	0.00764152	0.771887
034087fe-5ac1-4ad9-89aa-316529cd09f0	f5c	uncalled4	1.01866e-05	0.00172562	0.806933
0340f09d-7d2b-468f-85e8-baa7c85794f6	f5c	uncalled4	1.49748e-05	0.00358473	0.769663
0343b8e9-1553-4895-a840-3ee7fa5fc00a	f5c	uncalled4	3.24301e-05	0.00454542	0.746087
0344ad34-1b82-49cb-b243-cd2b4d729b43	f5c	uncalled4	9.7204e-06	0.00141032	0.783597
0346d569-d779-4cf6-813b-57e336c3d627	f5c	uncalled4	1.12935e-05	0.000804849	0.768019
0346dda0-7684-4330-81a8-383e8dd23cfc	f5c	uncalled4	5.22207e-05	0.017146	0.753691
0346f627-860d-46ff-8305-2e054bad251a	f5c	uncalled4
0347139c-252d-4476-b790-42c03209e33d	f5c	uncalled4	0.00854335	0.0413762	0.460979
034735f3-9052-4b14-aaf9-c7106822e84a	f5c	uncalled4	1.12352e-05	0.000988257	0.768515
03473ca7-9168-4309-97d5-07782464d66f	f5c	uncalled4	1.40777e-05	0.00312657	0.782927
0347ec72-45c9-417b-a3cd-06e0fd3f414e	f5c	uncalled4	2.47044e-05	0.00510656	0.788433
03480af0-39c7-449d-880d-817793e81204	f5c	uncalled4	1.59494e-05	0.0037308	0.764466
03483d22-5e3a-49dd-9319-c5fa40254949	f5c	uncalled4	2.79321e-05	0.00332086	0.782122
0349683e-1561-4a99-84d3-b1d565e8adf6	f5c	uncalled4	1.65516e-05	0.00177696	0.791786
034aec10-25a7-4aac-b0e3-52b33b37ae04	f5c	uncalled4	0.00018858	0.0147038	0.754034
034bcea1-a8a8-4f1b-a4dd-61a6132cbd6c	f5c	uncalled4	3.92929e-05	0.00696588	0.772832
034cbe46-5e1b-4008-8bd0-afbc4f87e18a	f5c	uncalled4	2.7547e-05	0.00253728	0.794114
034cdcc2-cb46-4f51-b2c2-f9b54f8cb22f	f5c	uncalled4	1.40688e-05	0.00062021	0.7861
034f5e9a-c4db-4c78-bff4-b5666fe50b7a	f5c	uncalled4	1.75776e-05	0.000949968	0.803409
0350b6e6-30c7-49b1-9099-731a9f676f18	f5c	uncalled4	0.00621051	0.119111	0.695215
03514235-e28a-4078-9b17-bf393d35c5e0	f5c	uncalled4	1.15608e-05	0.00125659	0.786403
03517df6-45fc-4b85-834e-0d611adee423	f5c	uncalled4	2.1577e-05	0.0177775	0.78792
0351a5e9-5763-4352-9c8c-e07823789a6b	f5c	uncalled4	2.34242e-05	0.00337892	0.701743
0351bac7-ab04-4bd0-a138-4859e7a19061	f5c	uncalled4	3.13445e-05	0.00462848	0.782874
0351f8ab-91c5-4503-8945-c823088bb388	f5c	uncalled4	2.30815e-05	0.00134682	0.77298
03525bff-4e97-41b8-98a1-3315aab940e0	f5c	uncalled4	1.14123e-05	0.00211923	0.851974
0352645e-4df5-4433-a231-f0cd7fcdd244	f5c	uncalled4	1.24785e-05	0.00154946	0.759389
0352e842-fb86-4224-af6c-4525199c637e	f5c	uncalled4	0.000893678	0.0096022	0.659287
0355d47e-7308-4b7c-9472-76471cb4b9cb	f5c	uncalled4	2.93427e-05	0.00462824	0.798868
0358cfb0-f02e-44c8-8d64-1bcaa6f54c0e	f5c	uncalled4	1.33795e-05	0.00306349	0.786835
035906d2-ceea-40ad-ab9e-76d0ed8ec0b2	f5c	uncalled4	1.87483e-05	0.00182716	0.777013
035a1ed7-65c0-4fb2-9ad6-2403aa55f281	f5c	uncalled4	2.4929e-05	0.00333646	0.781005
035a4b3d-686f-4f1b-ada3-a8abdaf6e07b	f5c	uncalled4	1.29879e-05	0.000725568	0.763026
035bbc26-8c1f-4b82-b7ae-1c76793e95ff	f5c	uncalled4	1.06572e-05	0.00200279	0.784981
035d960c-c286-4f34-8f23-b755daffa2ed	f5c	uncalled4	1.94137e-05	0.00260307	0.770347
035db69f-d3dc-465a-b0d9-c2016803748f	f5c	uncalled4
035e2281-6f70-46f8-a913-70e573dc8a76	f5c	uncalled4	1.84264e-05	0.00442248	0.76049
035f5afe-ba6e-4388-8dac-07d4735d4811	f5c	uncalled4	1.67781e-05	0.00240342	0.790873
036044ce-0d38-421c-aabc-fe06a1071bd8	f5c	uncalled4	1.27434e-05	0.00233284	0.785394
036050aa-2f27-4357-8e1b-1a1a0eb61354	f5c	uncalled4	0.000175172	0.293497	0.654938
03619c85-ba57-432f-85ac-5fbcff74a76f	f5c	uncalled4	1.69289e-05	0.00332453	0.761287
0362eeb1-0051-450b-a9cc-b87c93a68691	f5c	uncalled4	2.00677e-05	0.00478297	0.762163
03633287-95b8-4162-8861-aee86d183d6c	f5c	uncalled4	1.17423e-05	0.00124483	0.751014
036395d7-93e3-48d5-8f5a-8f65b7ed88d5	f5c	uncalled4	2.37285e-05	0.000901282	0.785125
036410e3-189d-4413-9116-21109e01b150	f5c	uncalled4	1.29302e-05	0.000974687	0.764927
036563f5-316f-402f-a9eb-b124c214bbc2	f5c	uncalled4	1.65462e-05	0.00210942	0.792284
03664f75-8a13-4cc7-89bc-15ed53b75bd6	f5c	uncalled4	9.90075e-06	0.00141393	0.788918
03665079-b110-4262-b2e7-20f76b133a26	f5c	uncalled4	1.17541e-05	0.00181832	0.768852
0366d246-dbc2-4b2b-8e2b-9a4eb44a3907	f5c	uncalled4	2.49263e-05	0.00296158	0.774601
03675719-c1ed-4097-be66-7bddcfe9e50f	f5c	uncalled4	1.2865e-05	0.00102175	0.780858
0367f96e-7453-46cd-9584-289b88df14ad	f5c	uncalled4	1.74444e-05	0.00347324	0.769892
0368256b-486d-4705-a48f-0f833d4308aa	f5c	uncalled4	1.13319e-05	0.00117303	0.783436
0368c3f5-1d8a-48ed-b34f-5517e542f4e6	f5c	uncalled4	5.10677e-05	0.00522094	0.574013
0368df7e-a668-48ae-bc7e-3d48fd6e28be	f5c	uncalled4	2.13642e-05	0.00348278	0.779719
0369b670-f9f0-4f06-8af2-f2de2d7999fe	f5c	uncalled4	2.06157e-05	0.00130219	0.760409
036a5ed2-d6d8-4212-a3dd-5f8976f7332f	f5c	uncalled4	1.19438e-05	0.00347625	0.792415
036b5f85-e8fd-4df1-881c-8db63be8a0c5	f5c	uncalled4	1.52071e-05	0.00117419	0.745032
036b6b06-2340-4cb7-8808-87c271b52bbb	f5c	uncalled4	1.10015e-05	0.00169945	0.77265
036b7731-6c17-4061-a301-89715f7c044b	f5c	uncalled4	1.62926e-05	0.00143071	0.779615
036b79fa-dfdb-4bc0-89bd-518fefd4a4e8	f5c	uncalled4	1.99981e-05	0.0045062	0.683265
036cbb0e-3184-4907-be14-4f622a1ad9e0	f5c	uncalled4	9.85202e-06	0.00276318	0.795458
036d1d20-7bf6-44ca-b76d-b0d17e84faf4	f5c	uncalled4	3.6061e-05	0.00533571	0.720436
036d50be-1495-4561-969e-1f8d6cff55f9	f5c	uncalled4	0.000539135	0.217997	0.543686
036d6c00-9662-4739-b0c1-6fd7b5912332	f5c	uncalled4	2.2319e-05	0.000914531	0.780217
036e7a2d-df24-4293-af16-3a63204127b5	f5c	uncalled4	1.9785e-05	0.00246883	0.779115
036f5bf4-fba7-4f2e-8da9-1cd1f4637fa1	f5c	uncalled4	3.01861e-05	0.00217625	0.748061
036f6205-08f3-4804-a426-ed4d2e780e11	f5c	uncalled4	1.27885e-05	0.000834341	0.786548
036f6378-afc7-4f82-a144-8bc2b7c4f420	f5c	uncalled4	3.37825e-05	0.00416739	0.774591
0370c5ba-1f6b-4c6a-bf6f-6dcea0056377	f5c	uncalled4	1.74891e-05	0.000876442	0.778571
0372e7ce-efba-4418-b0e8-b55a09577f97	f5c	uncalled4	1.00929e-05	0.000475835	0.778268
03739e8d-03da-4b28-8a62-c9c0f2c16f2c	f5c	uncalled4	3.78255e-05	0.00617839	0.791587
03740471-ad55-4f4f-9a46-8628bbc96efc	f5c	uncalled4	0.00121544	0.298729	0.73381
0374a157-23d1-44e2-9ce4-a685596c0a06	f5c	uncalled4			0.805163
0377cf26-79e0-4be4-834f-af2dfe827742	f5c	uncalled4	1.17963e-05	0.00258538	0.807056
03785bd4-f2e0-43b4-bc0b-cc890328787d	f5c	uncalled4	3.91701e-05	0.00547923	0.757465
037a372a-d47c-4e96-87a8-860b3579248a	f5c	uncalled4	1.06041e-05	0.00157092	0.79313
037a62d0-5498-4b77-800c-1bf16b55f289	f5c	uncalled4	1.84046e-05	0.00307005	0.775524
037aa0b9-bfdd-42c4-b934-10eccaeb7041	f5c	uncalled4	1.52227e-05	0.0025513	0.784362
037add20-2a6e-4e50-8e02-4602a0086b3b	f5c	uncalled4	1.6993e-05	0.00101516	0.798024
037b36d4-0d25-443f-acf1-c9c64bd76744	f5c	uncalled4	1.22558e-05	0.00336066	0.778939
037c2398-2cf9-4b2a-b96e-cf064e7b2aa8	f5c	uncalled4	1.54527e-05	0.000743122	0.775926
037da124-7c9a-4048-9d0e-4088e919b577	f5c	uncalled4	1.85958e-05	0.0018645	0.783527
037da56f-397c-4224-8789-fe452e7df183	f5c	uncalled4	1.02479e-05	0.00114884	0.791321
037e1be0-5e18-478e-a3bc-4327c9adf1a5	f5c	uncalled4	1.43281e-05	0.00246074	0.767116
037e8d67-ca29-447d-9f0d-547f6402b241	f5c	uncalled4	2.24087e-05	0.00320305	0.772539
037fb769-1bb2-4285-bc1e-1a3815bc37b7	f5c	uncalled4	1.09004e-05	0.00164472	0.783869
037fc171-23ad-4c51-9a80-2e3ddf90544c	f5c	uncalled4	1.22584e-05	0.00207955	0.787751
0380499a-42e9-47e3-9df8-8dc32e7929aa	f5c	uncalled4	1.57758e-05	0.00344681	0.772973
0380dc07-f169-4851-ba00-acd8ade2ef57	f5c	uncalled4	1.35629e-05	0.00292475	0.769274
03814c83-5054-468a-8ba0-dd6a09bc6711	f5c	uncalled4	4.30851e-05	0.00279105	0.725997
03815e0c-d246-4e96-ab3a-9963a6405f03	f5c	uncalled4	1.39952e-05	0.0027444	0.772884
03823d4b-c578-480e-a4bd-54ab915e1082	f5c	uncalled4	8.71316e-06	0.00118322	0.802822
0382e4c1-eb50-47e5-b61b-155b74113dff	f5c	uncalled4	2.02e-05	0.00287116	0.767866
03833f85-8eda-45dd-914a-48d29f78ca52	f5c	uncalled4	2.8258e-05	0.00282249	0.720009
0383b6b6-9393-46d2-b2cc-bea9f085af06	f5c	uncalled4	1.20841e-05	0.00370927	0.775622
0383c786-922d-4685-a00f-6850f020d802	f5c	uncalled4	3.17983e-05	0.00417888	0.777269
0383f4c2-c19b-4495-a2c1-22993aba681d	f5c	uncalled4	2.17225e-05	0.00371031	0.784366
03846a4e-6d04-42cf-9ef7-344c1c29ad95	f5c	uncalled4	1.61654e-05	0.00101009	0.780895
0384f2ed-4abd-4ecb-9dfb-3aa8715e0805	f5c	uncalled4
0387fd8f-ae18-4bf4-beb7-430dfb1bf71d	f5c	uncalled4	1.10769e-05	0.000614206	0.784247
03883d03-68de-4fc1-b710-d947b88122b8	f5c	uncalled4	1.40431e-05	0.00417679	0.762662
03896407-2f32-48e2-b7b9-faf79f78d9fb	f5c	uncalled4	1.5945e-05	0.000934622	0.765131
03899c1f-e180-4fda-8f6e-7d4acdf72161	f5c	uncalled4	2.67492e-05	0.00193546	0.756039
038c679a-0054-4882-8bc2-cec562a88290	f5c	uncalled4	1.54442e-05	0.00123121	0.811376
038c9f72-3582-435b-ba89-49ec104e5682	f5c	uncalled4	2.93393e-05	0.00644741	0.785035
038d8447-536c-460d-b5dd-b0f3a14d5fad	f5c	uncalled4	3.44784e-05	0.00233584	0.711913
038ecb2d-d3e8-44b3-9bf7-2cd41a35a3be	f5c	uncalled4	1.3377e-05	0.00128383	0.792302
03909ccb-898b-407b-9238-b95c89f553c6	f5c	uncalled4	1.61949e-05	0.0013222	0.775788
0390a12e-558b-42c5-8fb9-4910468472e8	f5c	uncalled4	1.72447e-05	0.00108993	0.788563
0390e243-3490-4d08-91d7-8490158fdbe6	f5c	uncalled4	1.57658e-05	0.00376288	0.750945
0390f96e-81ab-42cb-97b9-66ce289eefce	f5c	uncalled4	4.43445e-05	0.00494449	0.748621
03910219-8f04-4858-96c3-f5c8f3d62eaa	f5c	uncalled4	1.06995e-05	0.00105009	0.768453
0391361b-0de7-42be-9179-cf1a241dbd91	f5c	uncalled4	0.00922648	0.114911	0.518225
039188d0-905b-4e9b-b722-9221058ff2ed	f5c	uncalled4	1.26542e-05	0.000981825	0.779015
03918b0e-570a-4f4a-81ed-d6a1736709c7	f5c	uncalled4	1.09239e-05	0.000832476	0.780756
03928213-e768-4382-8a9f-11ed3d0160f6	f5c	uncalled4	5.63767e-05	0.0063487	0.777568
03930bd5-3f6e-49dc-8a56-4c9b04119661	f5c	uncalled4	1.35742e-05	0.000844014	0.766538
039375c8-2056-4dbb-8286-4a3b1302d170	f5c	uncalled4	1.05979e-05	0.000850579	0.80259
03943d54-d7f2-48e5-8139-a83c546034f2	f5c	uncalled4	1.91998e-05	0.00110604	0.791125
03951a17-9ae9-4797-a118-20aade5729c3	f5c	uncalled4	1.05448e-05	0.00111718	0.786272
0396cacb-df71-4517-aa8b-36f59eec73de	f5c	uncalled4	1.10238e-05	0.00235212	0.786461
0397b069-c088-410f-a94d-f8c10cb52d87	f5c	uncalled4	1.32524e-05	0.00166295	0.777969
0397e988-9abd-4a60-b74b-6e2446ffe839	f5c	uncalled4	1.38329e-05	0.00506583	0.786968
0398a3ae-a9ae-482b-bf85-9186962bbe55	f5c	uncalled4	1.50491e-05	0.00273062	0.759681
0398c73e-b8d3-4f5c-bad2-9268e84955fa	f5c	uncalled4	1.40699e-05	0.00105924	0.770357
039a3535-49f5-45ec-a84d-4efdf0fb5414	f5c	uncalled4	1.28839e-05	0.0024674	0.78036
039ad8f7-f2a3-48f2-81d1-b48502fbe68a	f5c	uncalled4	3.10715e-05	0.00252191	0.781765
039b5c80-4d60-46f8-8c86-2f1f4fbfe03c	f5c	uncalled4	1.07716e-05	0.00161031	0.78449
039b7610-8b9c-4aac-a509-32fa4a6849a8	f5c	uncalled4	1.88604e-05	0.0043251	0.769218
039c0604-55f4-4689-96a0-78fcafca8615	f5c	uncalled4	1.8223e-05	0.00274653	0.779492
039c8ecf-0d9f-4d42-911c-c97b98e93eca	f5c	uncalled4	1.20452e-05	0.00120262	0.787138
039cc062-ce7b-4ad6-99a4-70d2ac30e796	f5c	uncalled4	1.65515e-05	0.00196645	0.717358
039ccb9e-4933-4f70-b8ab-1cd1a7f9b355	f5c	uncalled4	6.11715e-05	0.0067179	0.773449
039d0b52-d3f8-40e3-be57-39b827610a06	f5c	uncalled4	2.24589e-05	0.00199824	0.767866
039d1103-6632-4c26-8aed-00fd2abb8bfb	f5c	uncalled4	1.12384e-05	0.00201277	0.782442
039e0229-a5db-4378-a6ba-d016308f014c	f5c	uncalled4	1.36109e-05	0.0013989	0.764627
039e339f-373c-48e9-9785-680ef2f732db	f5c	uncalled4	8.05287e-05	0.0115807	0.575702
039edb16-3dd1-4fcb-a9e7-6d010557ab03	f5c	uncalled4	1.4504e-05	0.00146692	0.799956
03a185f8-d0fa-40ef-8c9b-984f83efaf7c	f5c	uncalled4	1.7014e-05	0.00147729	0.78822
03a1b13c-0a5d-4298-b674-624dc9fba727	f5c	uncalled4	1.99536e-05	0.00408603	0.775662
03a280be-841a-4e61-8f42-9d3754dc2d9d	f5c	uncalled4	1.24642e-05	0.000828122	0.776173
03a2e0bc-d5eb-4f19-a12b-99457af67cfc	f5c	uncalled4	2.44126e-05	0.00142609	0.740433
03a30519-2eec-4059-8356-8de72e825d89	f5c	uncalled4	7.90067e-06	0.00406709	0.863224
03a36fad-1ff5-4aef-9bab-6b4a32e0cbd0	f5c	uncalled4	1.05396e-05	0.00139792	0.792264
03a3f713-2c1b-4d15-b0be-eb9aef557198	f5c	uncalled4	1.14103e-05	0.00144896	0.776775
03a42bec-35f8-4364-9881-d07e29d78695	f5c	uncalled4	3.2387e-05	0.0041406	0.749409
03a43237-5f8c-4c8d-ab10-1815b47965f2	f5c	uncalled4
03a47465-a73a-4b5d-816b-40f4e2fcd218	f5c	uncalled4	1.9572e-05	0.00184624	0.775646
03a4e2cb-39e8-4aa3-b675-42311daad091	f5c	uncalled4	2.17645e-05	0.0122962	0.793491
03a50fa6-089d-44cf-961f-fe738e3a8fc7	f5c	uncalled4	1.07472e-05	0.000683975	0.778744
03a56f60-fdf2-4db6-87c5-3926da2c6538	f5c	uncalled4	1.53075e-05	0.00146891	0.781495
03a57a01-48e7-4904-99d2-18b8ff98b217	f5c	uncalled4	2.46043e-05	0.00443913	0.766177
03a57f4e-e214-4aa7-851f-806c411bfa22	f5c	uncalled4	2.67272e-05	0.00245088	0.760049
03a69e69-0042-4323-b301-e1ca09b92db6	f5c	uncalled4	1.68952e-05	0.0016652	0.773497
03a6db6e-150d-47cb-87a0-1e79880030e4	f5c	uncalled4	1.62657e-05	0.000689586	0.765884
03a7d7a0-dd34-43d5-a55c-0f3d22f757e2	f5c	uncalled4	5.7354e-05	0.19027	0.779864
03a9c2e4-f33c-4dc3-b8f8-78030ec4145c	f5c	uncalled4	2.45332e-05	0.00384117	0.782367
03aa13c3-2777-41b1-8993-7b472a7c94ff	f5c	uncalled4	1.10108e-05	0.000959165	0.79809
03aa94e4-2135-4a5b-bfd6-edcfece29ea2	f5c	uncalled4	1.37788e-05	0.00166723	0.781465
03aaf2cb-b5e3-4521-9ed0-e1f90ba3a202	f5c	uncalled4	2.14137e-05	0.00122198	0.749922
03ab3e57-8421-432a-8ce6-3d47630d52dc	f5c	uncalled4	1.72928e-05	0.000919826	0.790045
03abfeae-3641-4942-891f-884a4b0a189d	f5c	uncalled4	1.29954e-05	0.00105231	0.776106
03ac20e0-0c4b-4475-8d2c-c384ec615409	f5c	uncalled4	2.23192e-05	0.00438499	0.788914
03adc1fa-4c8e-4397-a409-fd798ab96912	f5c	uncalled4	1.2999e-05	0.000797928	0.729095
03aeabf4-fa0a-498c-a2b1-8941ad3d8b49	f5c	uncalled4	1.44583e-05	0.0030452	0.785994
03b0fcc6-79bf-49fc-9a70-7ace47fc4afe	f5c	uncalled4	1.3861e-05	0.00231516	0.790844
03b10aa9-ff42-4406-bd2a-43959642a28d	f5c	uncalled4	2.05764e-05	0.00182043	0.799117
03b19fc7-bbb3-4301-8cd5-254ad2416b97	f5c	uncalled4	1.60591e-05	0.000964756	0.79932
03b1ae8a-1093-4915-a8df-8a7e191b30a3	f5c	uncalled4	1.70659e-05	0.00115203	0.799179
03b1ba2b-1f5e-4a19-922e-e7bfbb73e386	f5c	uncalled4	1.63349e-05	0.00183852	0.776409
03b2b33c-a264-45ba-aeca-708bd7b6a649	f5c	uncalled4	2.1477e-05	0.00186215	0.787054
03b2dd23-4e09-4b48-bd55-0b43d790911a	f5c	uncalled4	2.18024e-05	0.00835665	0.77627
03b378fa-3997-43bf-a247-510a19b8988a	f5c	uncalled4	1.95613e-05	0.00417797	0.763914
03b43e08-7dc8-40d7-8f26-f9eb07a04404	f5c	uncalled4	1.69156e-05	0.00454975	0.78094
03b6460c-ef17-4e75-afbb-423a1903659a	f5c	uncalled4	1.94514e-05	0.00112132	0.775325
03b6862a-f2a7-4ae2-99d5-729409d357be	f5c	uncalled4	2.15101e-05	0.000970536	0.786006
03b6bb39-27c1-41d0-b620-8b3dc906738f	f5c	uncalled4	1.91375e-05	0.00168396	0.776731
03b75505-aba8-4617-8eef-1fe8723774cb	f5c	uncalled4	2.03801e-05	0.00104881	0.733746
03b80246-26e7-4e37-a4ec-9ad80d6fca0d	f5c	uncalled4	1.63742e-05	0.00191013	0.774592
03b8a9d7-cfab-4a5a-aa8a-dea6e62f4263	f5c	uncalled4	1.4338e-05	0.00155608	0.779431
03b91724-cd4b-4c13-8a6b-6b4b0ede72d3	f5c	uncalled4	1.72822e-05	0.000793021	0.775679
03ba0d14-5f75-4e81-80bc-dd138d1fb2ac	f5c	uncalled4	1.08961e-05	0.00145557	0.801672
03ba2685-3811-4886-9349-ab2a2230ba88	f5c	uncalled4	1.95577e-05	0.00186846	0.791325
03bafef1-05a1-4717-869f-23beb1e156c7	f5c	uncalled4	1.13166e-05	0.000666928	0.772932
03bbf6ba-c350-45d9-aaaf-9f29cc2df0ba	f5c	uncalled4	0.000325856	0.028236	0.830426
03bd3167-feea-4c8c-b0fd-948b16094eac	f5c	uncalled4	1.51273e-05	0.00349489	0.793369
03bdba06-eb7e-43d6-bf8f-c074258115f3	f5c	uncalled4	1.66081e-05	0.00287817	0.786375
03bdf9f3-bcee-40e0-84d9-f8ee9feed201	f5c	uncalled4	2.19203e-05	0.00630849	0.732731
03bef49a-4c8b-4f55-954f-4203e63b0ca2	f5c	uncalled4	1.16523e-05	0.00161315	0.778184
03bf4df8-ebd6-4fa5-966c-51f6b4552139	f5c	uncalled4	1.74805e-05	0.000873619	0.774026
03c00fb7-ce80-493c-ba34-0f412a2c608b	f5c	uncalled4	1.06605e-05	0.00146994	0.774983
03c38eb9-ec1b-40e1-aab0-b2c25d29538e	f5c	uncalled4	3.90219e-05	0.00266134	0.738031
03c49147-3517-4bac-9d6d-6c56818f331b	f5c	uncalled4	2.55188e-05	0.00114905	0.788875
03c5a390-88b8-4091-b91c-900910152829	f5c	uncalled4	1.02241e-05	0.00109244	0.789373
03c607e0-ad6a-4f57-8960-d3692ccfa5df	f5c	uncalled4	1.99591e-05	0.00262509	0.778515
03c70c97-9439-4b0c-bd81-e8abbd0f1541	f5c	uncalled4	1.86676e-05	0.00128996	0.752319
03c7582b-4155-4d5e-88f2-6cfcd05893d6	f5c	uncalled4	1.34838e-05	0.00108614	0.757223
03c75cbd-b6ca-42fb-abc6-822de28bba03	f5c	uncalled4	3.11515e-05	0.00520101	0.766427
03c791d6-b2dc-4a94-9020-ad87266fc935	f5c	uncalled4	2.30307e-05	0.00193647	0.778114
03c8ef31-221b-4965-b2f3-74af9ae50609	f5c	uncalled4	0.000126147	0.0188118	0.737356
03c97052-85a6-4b80-b838-a89c0173e133	f5c	uncalled4	1.42995e-05	0.00146933	0.771764
03c9b4e7-ef03-4d9a-87d6-dde1fee51c5a	f5c	uncalled4	2.66261e-05	0.00168433	0.758495
03ca2121-de83-465c-8045-2b6e9c8eff1d	f5c	uncalled4	2.63629e-05	0.00102401	0.773499
03cab89b-6d1b-4167-b5bb-46de604f6ee0	f5c	uncalled4	1.37591e-05	0.000988958	0.751168
03cc3132-e49b-4ed5-bd30-e329769d061a	f5c	uncalled4	1.59354e-05	0.00149717	0.769691
03cc46a0-3b85-4096-8044-01f5b5dad6ab	f5c	uncalled4	1.36358e-05	0.00270945	0.794188
03cccca8-0cd1-4bc0-8e91-91e72cc93aae	f5c	uncalled4	1.53846e-05	0.00184615	0.779673
03ce272f-3b1e-4b95-bea7-3422793c62e5	f5c	uncalled4	0.00808297	0.117592	0.679487
03ceca39-fecd-4bea-94fa-dc931e79363c	f5c	uncalled4	2.62197e-05	0.00403143	0.774114
03ced564-f94a-4dc0-8cd0-f57d384a9cb4	f5c	uncalled4	1.45661e-05	0.00143794	0.765077
03cf2c9a-9906-40f8-afe2-799013846a24	f5c	uncalled4	2.43827e-05	0.00164086	0.789461
03cf57df-c9ea-4bb6-ac26-cf496153bbf8	f5c	uncalled4	1.96031e-05	0.00375377	0.776364
03d074dc-c43b-4687-a3a4-2c91417177ec	f5c	uncalled4	1.19571e-05	0.00241682	0.77219
03d0c47d-7b83-42af-8be2-c265573e1b3d	f5c	uncalled4	1.16559e-05	0.00191634	0.782056
03d17948-aa1c-4076-a681-a6b0fe2f201a	f5c	uncalled4	1.44542e-05	0.00378769	0.783269
03d32942-40c4-4284-b283-2606d99e2f91	f5c	uncalled4	1.41451e-05	0.000951349	0.772532
03d464a5-4322-4c3e-b6f8-0074b4ac2705	f5c	uncalled4	1.90128e-05	0.00449572	0.774339
03d49744-7868-41e3-b8a2-ce0b6f720519	f5c	uncalled4	2.65339e-05	0.00254794	0.766025
03d4c550-fdab-4755-aa99-ecfd468a8899	f5c	uncalled4	0.000502684	0.252085	0.607133
03d5eded-8612-464a-aca0-0206d2a910ed	f5c	uncalled4	2.03125e-05	0.00205097	0.79787
03d6409c-33ed-4c84-bd38-347a3b82ddb4	f5c	uncalled4	3.55205e-05	0.00155098	0.705114
03d75db7-8365-4c17-b979-253402d79e8b	f5c	uncalled4	2.72382e-05	0.00346012	0.78943
03d8dccd-a45a-4049-91b3-7e51f563b965	f5c	uncalled4	1.6695e-05	0.00285216	0.776412
03d9cf40-aecb-444a-aacd-a1110c98dee7	f5c	uncalled4	2.27759e-05	0.00446738	0.765743
03daacd4-f02e-4610-bb3d-191b3fee4966	f5c	uncalled4	1.11609e-05	0.00417567	0.771231
03dabe5e-f99d-4bec-951c-89059167b9e2	f5c	uncalled4	1.15759e-05	0.00115313	0.784902
03dbd834-bd86-4e89-8924-cf288adeb733	f5c	uncalled4	1.53333e-05	0.00213634	0.739107
03df11c2-0fef-4f8d-bd7e-589570c89595	f5c	uncalled4	2.46272e-05	0.00684682	0.774422
03e00290-545e-424f-9219-520dad118f20	f5c	uncalled4	2.75798e-05	0.00244409	0.795149
03e0d3cd-62f9-48dd-8455-7f4915c84c24	f5c	uncalled4	0.000262611	0.179094	0.758746
03e40c44-b8b8-4de4-8403-6c6891125cff	f5c	uncalled4	2.40048e-05	0.00156075	0.767844
03e444a9-ed36-434a-b03c-2ff7fad10b58	f5c	uncalled4	0.00240364	0.306993	0.683865
03e551bd-4854-4f78-b5c7-a8739d70a54d	f5c	uncalled4	2.58853e-05	0.00375331	0.777701
03e5797e-1066-47c9-b1eb-5ab4aca986c2	f5c	uncalled4	1.61491e-05	0.000930454	0.756801
03e63548-acca-4252-b009-ecb63ffd6e31	f5c	uncalled4	2.28568e-05	0.00164429	0.795109
03e71d1b-b3a8-4af6-a30a-0077416fdab5	f5c	uncalled4	1.16374e-05	0.00143028	0.783085
03e8997d-8109-4959-b15b-dc05cd9eae1e	f5c	uncalled4	2.08227e-05	0.00392792	0.752063
03e9de96-04ab-4e8b-9271-a30e3f0b461d	f5c	uncalled4	4.04447e-05	0.014813	0.756172
03ea1805-3cdd-4311-bf9c-735514c6afbf	f5c	uncalled4	2.42255e-05	0.00307537	0.7472
03ea8bc0-5c88-4322-ac42-c27fc69073e6	f5c	uncalled4	2.03072e-05	0.000948633	0.767323
03ebff6a-ad7c-4f6b-a247-dfbfeaf32324	f5c	uncalled4	1.32317e-05	0.00137951	0.805309
03ee0e0d-f4ad-4946-9f98-98f6240e0a37	f5c	uncalled4	2.53629e-05	0.00236176	0.783157
03ee3d29-21a1-4133-81d0-52e97c57b128	f5c	uncalled4	1.24234e-05	0.00308813	0.789433
03ef09d4-ba61-4561-8f1f-ce4b66d7b929	f5c	uncalled4	1.87541e-05	0.000887858	0.793911
03effdac-4d52-497c-8b70-62d842373908	f5c	uncalled4	1.57824e-05	0.00428659	0.786422
03effdfe-c0b1-46a6-9196-cfd3e679928f	f5c	uncalled4	1.70726e-05	0.000900205	0.795057
03f0bd57-723b-44cc-bdf3-65a36e928312	f5c	uncalled4	1.66352e-05	0.00135454	0.787733
03f119ff-b7da-45e0-8a6a-6b99bd3e08fe	f5c	uncalled4	2.33866e-05	0.00589978	0.791114
03f13ba3-0390-4cb7-9195-816ad7e174d5	f5c	uncalled4	0.143474	0.288447	0.0320266
03f1820e-c6d6-41cb-b93a-2a269997fd49	f5c	uncalled4	1.9428e-05	0.00555696	0.773308
03f1f78a-fa29-4ea5-b63d-05d04360ab9a	f5c	uncalled4	2.08588e-05	0.00188249	0.771887
03f33ca1-ee72-4efa-9882-7ab68b3836e7	f5c	uncalled4	1.79048e-05	0.00249965	0.78163
03f3ce66-8186-4be6-8fdb-d2905a22b864	f5c	uncalled4	8.90135e-06	0.00122592	0.80748
03f485a2-d07f-4ec1-9193-34f53c3d8d84	f5c	uncalled4	2.10877e-05	0.00637664	0.780488
03f4bc8d-0b12-4fb2-81b9-9ebf3bdc9bb9	f5c	uncalled4	1.19035e-05	0.00104923	0.793141
03f50d96-7f5f-4915-9c53-40c24c593abc	f5c	uncalled4
03f58f0a-2c29-4b94-b284-39489a666ff0	f5c	uncalled4	0.000581697	0.00906446	0.573271
03f5a34e-ec7d-43d8-8f22-2ebedc79575f	f5c	uncalled4	1.85045e-05	0.0012857	0.787994
03f68107-9723-4f59-96ef-6454f6facfe4	f5c	uncalled4	2.33123e-05	0.00271508	0.776215
03f7b29f-ca16-4087-ae71-9e8bb5388093	f5c	uncalled4	1.26195e-05	0.00192862	0.780667
03f8e4a7-7bc0-4a3f-bfc9-c5d82476793a	f5c	uncalled4	2.61634e-05	0.0163147	0.780403
03f93199-5eee-4d4d-b173-d7c6e6fd4460	f5c	uncalled4	1.34698e-05	0.00152708	0.786308
03f95b3b-382b-4fe1-b94e-691a3f18d1c2	f5c	uncalled4	1.98839e-05	0.00144499	0.793193
03faa271-2a4c-4f9a-9675-6138b42a1fdd	f5c	uncalled4	1.18455e-05	0.000605013	0.790673
03fb16c0-49c4-4785-a384-1b4dbed049b0	f5c	uncalled4	1.66516e-05	0.00151712	0.782331
03fb5671-6db1-4aa2-b738-390c5cbc13bb	f5c	uncalled4	2.31468e-05	0.00416521	0.791824
03fc6981-df6e-4697-bf6f-2724d0e6f55e	f5c	uncalled4	1.15251e-05	0.00097618	0.775195
03fc7737-8dcc-4979-b3e2-9858ab3cb377	f5c	uncalled4	1.43363e-05	0.00225399	0.763044
03fd77a2-6afa-4969-8017-52988bef48a4	f5c	uncalled4	0.000209032	0.0890114	0.673675
03fdcc94-7aff-4d31-a557-0f4dfab66b39	f5c	uncalled4	1.63009e-05	0.00176938	0.768175
03fdd01c-4c33-473f-9d05-20ce048cd9e7	f5c	uncalled4	4.25991e-05	0.0033623	0.776446
03fdf919-8296-4e8c-a62d-b6f8a022ae4d	f5c	uncalled4	2.08375e-05	0.00108925	0.777347
03fe3b4b-a0d3-4390-a669-b084ed209853	f5c	uncalled4
03ff0d92-9525-4987-b280-40d29fba00be	f5c	uncalled4	1.07931e-05	0.000549528	0.766932
03ff29d3-da7c-4790-8dbf-226e586e62a3	f5c	uncalled4	1.23773e-05	0.00213617	0.77429
03ff3b16-992e-4f04-aefc-3c3caab4a625	f5c	uncalled4	1.28961e-05	0.00806963	0.789655
03ff3fe4-fc09-4f1c-a91f-96d041491552	f5c	uncalled4	8.52808e-06	0.00134873	0.834914
03ffd505-02f6-4806-839e-1703c560e55d	f5c	uncalled4	0.095798	0.186466	0
03ffdf76-a866-4558-9545-8a0a7de1f8c3	f5c	uncalled4	3.8063e-05	0.0191208	0.790476
040019fb-8165-46b9-9c52-f316d0e2e3ba	f5c	uncalled4	3.70295e-05	0.0040435	0.773938
0400b7b5-fa9e-45a8-9b83-b8d0e9d48df5	f5c	uncalled4	2.17543e-05	0.00160761	0.778698
0400d21b-3ad3-4407-91f4-e94346303d64	f5c	uncalled4	1.40636e-05	0.00346307	0.784186
04013a51-c5f2-46fe-a8fa-81029deb183d	f5c	uncalled4	1.79503e-05	0.00257338	0.754238
0401548b-f155-41fe-9c5d-1ddd84a8e213	f5c	uncalled4	1.52984e-05	0.00118398	0.760272
0402df09-a249-4cfe-a1cc-89d3dec2b89f	f5c	uncalled4	3.13277e-05	0.002145	0.746018
04035aca-5da0-4b38-b88e-e7d88663fe39	f5c	uncalled4	2.01992e-05	0.00252163	0.827601
040608bc-48d4-4a32-8533-e92a029ce774	f5c	uncalled4	2.72932e-05	0.00685532	0.764961
04066f77-31f5-4f8f-a453-fd7d17fc67ed	f5c	uncalled4	1.48279e-05	0.000786725	0.742031
0406f35c-c3d6-4f6f-9215-c1d7d2dc0a14	f5c	uncalled4
04082dc7-c9ea-40db-b85b-b280424f9cdc	f5c	uncalled4	1.34339e-05	0.0013471	0.77077
04098fdb-a070-45b7-884a-de904587da7a	f5c	uncalled4	1.77085e-05	0.00131874	0.785828
040bd780-445c-4d0c-b8db-c89d7588ed87	f5c	uncalled4	1.3998e-05	0.00201226	0.774646
040d4ec3-404f-4477-a3e0-bf67129f85d6	f5c	uncalled4
040e0683-bd61-493a-8ff2-24c4970f20e4	f5c	uncalled4	1.0093e-05	0.00101126	0.804786
040e0a2d-9cd4-45c8-812a-bd8845d2843d	f5c	uncalled4	1.38303e-05	0.00210044	0.785133
040e3ab8-b411-42f5-9693-cd51ac5c5e49	f5c	uncalled4	1.89672e-05	0.00363695	0.785411
040e6a10-3f71-4897-a467-4e008be6c229	f5c	uncalled4			0.394935
040f167f-a4bb-4b5c-b32a-ec64a54b744c	f5c	uncalled4	1.2777e-05	0.00146605	0.750443
040f625f-cbe7-4d4f-a57b-cc689a02a23b	f5c	uncalled4	1.79165e-05	0.00298877	0.779474
040f6ad6-e864-4631-960f-dc22528e0d6a	f5c	uncalled4	1.46345e-05	0.00169535	0.772738
041048da-4695-4580-80cc-e5e44d81cda7	f5c	uncalled4	1.28532e-05	0.00169142	0.780759
04112c81-9d15-4223-9005-779bd1b8bead	f5c	uncalled4	1.49711e-05	0.00107924	0.742302
0412109e-9aa7-4ff2-a646-52a502c3f4ac	f5c	uncalled4	2.01607e-05	0.00197142	0.791142
0412993d-9192-4953-a2d5-9756faf9aa64	f5c	uncalled4	1.26696e-05	0.000999414	0.789824
0413946e-9c4f-4417-a3a8-0327155965e8	f5c	uncalled4	1.21409e-05	0.00533953	0.79298
0413a169-1259-4cb8-ac0e-9219f7e9914b	f5c	uncalled4	9.77268e-06	0.000780074	0.788256
0414d68b-d3f9-4527-9b6b-6acae8fa68da	f5c	uncalled4	1.62816e-05	0.00412582	0.780093
0415139f-470b-4c60-94bd-bcc1c0cce1d4	f5c	uncalled4	1.26699e-05	0.00126632	0.767571
04158c6d-552f-4413-b05b-fd7b0916901a	f5c	uncalled4	1.35249e-05	0.00263177	0.780725
04161e8a-7d36-47cf-85e3-ed9d4d5e69d2	f5c	uncalled4	4.30718e-05	0.013475	0.759993
0417a356-f0b2-4bf4-bb9e-fb9bcdcc9964	f5c	uncalled4	0.000786316	0.0342886	0.736881
0418268d-3cb0-42df-a389-8f248301a333	f5c	uncalled4	1.60031e-05	0.000993542	0.767217
0418c15c-86b9-484c-933f-36b4d76eac81	f5c	uncalled4	1.97405e-05	0.00121053	0.797951
041930db-4658-4268-a26b-a000fa1723d9	f5c	uncalled4	2.34442e-05	0.00191327	0.771125
04193735-c893-4e50-a212-9303ca5de919	f5c	uncalled4	1.37923e-05	0.0011098	0.850776
04195901-5527-4b76-97d2-2b2fc72f2fe5	f5c	uncalled4	1.03244e-05	0.0010052	0.773198
0419ab53-aaf6-4f9b-8dab-7cf3b61b2b34	f5c	uncalled4	1.13719e-05	0.000982318	0.763016
041aba8f-9cc1-4df4-b9a5-dbef081379b7	f5c	uncalled4	1.20606e-05	0.0017253	0.765741
041b681c-c2c4-4091-97a4-d341339147ca	f5c	uncalled4	2.12006e-05	0.00154879	0.757419
041ba957-0c3b-4cf6-a843-096cee4ac53d	f5c	uncalled4	2.79169e-05	0.00190655	0.773967
041c7c6b-1672-40ba-9b54-a373d62899db	f5c	uncalled4	1.44766e-05	0.00189808	0.781503
041ce5c9-822c-440d-a237-9dfbd6934501	f5c	uncalled4	1.34864e-05	0.001632	0.789154
041f1dd3-b48f-4360-b08d-d560b1c04750	f5c	uncalled4	1.8755e-05	0.00253709	0.779659
041fc647-d8e2-4f6f-a07c-3336715a1cd3	f5c	uncalled4	1.36383e-05	0.000904604	0.785192
041fd042-f4db-4158-a412-6820f1f640c3	f5c	uncalled4	2.57151e-05	0.00361099	0.780626
04200c14-dfac-4b37-a8bc-edb9dd6bde08	f5c	uncalled4	2.43357e-05	0.0073813	0.785469
04211310-dbc2-484a-b4d9-3969fae931ea	f5c	uncalled4	1.92076e-05	0.00268223	0.777148
042137a6-004e-472b-bba0-51cef678c6a8	f5c	uncalled4	2.69636e-05	0.00492348	0.797505
04219c4e-4462-4f7f-b658-8f00b07f31dc	f5c	uncalled4	2.43593e-05	0.00169884	0.788672
0421b6c8-c427-404c-8a71-8541bbdaf767	f5c	uncalled4	1.67151e-05	0.00183959	0.737291
0421fbb9-da24-48d7-86df-08a7574535aa	f5c	uncalled4	2.18556e-05	0.00208679	0.774767
0422a6c1-8a7d-4faa-a1f9-f334c4fe76c6	f5c	uncalled4	1.3195e-05	0.0007957	0.799805
0423366b-784f-4e86-aa32-8e5bb71202c6	f5c	uncalled4	2.74587e-05	0.00146665	0.773984
0423df5b-0ba0-4ec4-a508-e083f0fe4461	f5c	uncalled4	3.16136e-05	0.0045679	0.755574
04240453-4d0b-4c10-a4ab-5772c91812f3	f5c	uncalled4	1.73456e-05	0.00377849	0.789116
04242c3c-0500-41b2-9d1f-09cd92a87699	f5c	uncalled4	0.000187248	0.0079476	0.76237
04253049-43c4-4814-a147-5b5ef79406b8	f5c	uncalled4	0.00198597	0.0424435	0.700316
04269c29-b59f-47f1-b42b-d5c599fbf2da	f5c	uncalled4	2.02008e-05	0.0019273	0.774955
04275465-94a0-4b4e-8d19-ee66b2fe840c	f5c	uncalled4	1.08765e-05	0.0012152	0.788078
0427c470-5350-4ddc-8dc3-bfb4805004ea	f5c	uncalled4	4.79308e-05	0.0125945	0.769087
0428ef18-82f2-4008-9e4d-2f8eb482b681	f5c	uncalled4	1.76406e-05	0.0014898	0.76365
0429ec3d-8b59-4de4-86c9-9d287e7208de	f5c	uncalled4	1.39167e-05	0.00333486	0.789842
042a1c9a-03aa-4583-b163-d6c85366dff4	f5c	uncalled4	1.16002e-05	0.000641437	0.779929
042a7e05-a4e2-4584-a2d2-1f599b5276b9	f5c	uncalled4	1.9902e-05	0.00326846	0.761687
042a876e-e924-4a8d-bba7-9b96bab80d40	f5c	uncalled4	1.70186e-05	0.0010112	0.784269
042a8f49-6f76-4372-b928-8de840e509a0	f5c	uncalled4	2.35958e-05	0.00450779	0.77234
042acdfe-8782-45b9-a800-cea81a01603a	f5c	uncalled4	1.486e-05	0.00395424	0.791336
042b5e74-26a5-47b1-be2f-b847b6834ad5	f5c	uncalled4	2.14058e-05	0.00399116	0.787127
042bb387-9745-486d-a55d-6c0b24272747	f5c	uncalled4	2.3757e-05	0.00177259	0.797265
042bfe02-19d6-45ff-831a-d3949cbd17c8	f5c	uncalled4	3.69598e-05	0.00368665	0.75552
042d28de-8cb5-497b-a9c4-8aabbbbeecff	f5c	uncalled4			0.743476
042d33a9-22e7-4a5d-83ed-a0887a4ea169	f5c	uncalled4	2.60031e-05	0.00102823	0.705476
042e1fff-7185-4c68-a568-12f8e6c305f1	f5c	uncalled4	2.00727e-05	0.00389455	0.775573
042e838b-7339-41ba-9d91-abd6b4757670	f5c	uncalled4	1.75059e-05	0.0016618	0.756308
042ea194-14a6-4640-905f-a6107298a725	f5c	uncalled4	2.22334e-05	0.000964987	0.780795
042ee507-68ac-4828-8d2b-b84e91574a30	f5c	uncalled4	1.77813e-05	0.001754	0.738531
042f3f97-a20c-4b69-adff-834a108a3075	f5c	uncalled4	2.80901e-05	0.00524992	0.783621
043010f5-db40-4de7-8435-00337ee78cd2	f5c	uncalled4	1.50053e-05	0.000815804	0.769772
0431021d-30c9-4fad-a269-1dfa3819c028	f5c	uncalled4	1.47446e-05	0.00351442	0.788023
04310800-a353-44b8-a1fb-70e2ee95b933	f5c	uncalled4	1.34058e-05	0.00447395	0.788214
0432c724-c48a-48f6-bdc2-cad6367dfbd8	f5c	uncalled4	5.00249e-05	0.00667023	0.77345
0433a86f-2d63-4215-a2cd-596a9f10f858	f5c	uncalled4	1.63981e-05	0.00274926	0.776564
04344831-65df-45f3-b823-353491480178	f5c	uncalled4	1.40346e-05	0.0023683	0.79049
043579d3-659c-4131-844c-6569b0c09979	f5c	uncalled4	2.15626e-05	0.00965718	0.773713
043641b3-0ff7-4a89-bb15-d2d3d99d7578	f5c	uncalled4	1.6916e-05	0.00104052	0.779039
0436c78f-5071-40a5-a01f-c85fd7dd67f8	f5c	uncalled4	1.41457e-05	0.00220576	0.791739
0436f4a8-b902-48a9-94ca-c895f377c23d	f5c	uncalled4	1.41945e-05	0.00187138	0.775055
0437d86a-049d-4b66-9a77-961b166faa97	f5c	uncalled4	1.41787e-05	0.00437905	0.793106
043822b1-a29b-4dd4-b704-9a5160b3a118	f5c	uncalled4	2.10214e-05	0.00172615	0.765743
04384b6e-51d7-431e-9361-94d22c0087fe	f5c	uncalled4	1.31045e-05	0.00164115	0.783706
04389d7e-76fe-40ee-88af-e7e5faaba65e	f5c	uncalled4	1.93677e-05	0.00176879	0.787038
0438a82a-3729-447e-b4a2-b65109509e33	f5c	uncalled4	2.2882e-05	0.00211735	0.776312
0438e1f9-4d4b-4db9-bb12-9c7c3475e8f8	f5c	uncalled4	1.6319e-05	0.000962948	0.779253
043aeb0c-a5d3-431e-aef4-b5ceb457a063	f5c	uncalled4	2.46585e-05	0.00359963	0.749365
043c75c3-f572-4bff-8c25-8381b6a92acd	f5c	uncalled4	2.11219e-05	0.00125869	0.754107
043cc745-e729-48ec-9087-340a4c2e81ed	f5c	uncalled4	1.51113e-05	0.00169135	0.769071
043d4e90-fe80-49ad-bf8a-00e792ecc9b5	f5c	uncalled4	1.08737e-05	0.00130499	0.779398
043d9eb7-527e-4a61-9fb1-40945107a299	f5c	uncalled4	4.53708e-05	0.00888803	0.776881
04406565-35ae-4e73-8fc3-4d167cc18c2f	f5c	uncalled4	1.4344e-05	0.00135417	0.804702
0441587d-c05a-4c60-8298-98ffa431430a	f5c	uncalled4	1.5961e-05	0.000759168	0.770517
04422859-3907-4fa1-a78f-3d02464ee595	f5c	uncalled4	1.9432e-05	0.00152752	0.782883
044250c7-a622-4dc5-99c8-7edd2af9bd3b	f5c	uncalled4	2.22503e-05	0.00119078	0.805071
0443914c-8d71-4646-82bc-a81de9127d97	f5c	uncalled4	0.000373802	0.0144402	0.750487
0444a6d0-f8d5-4e92-953d-a23d9e74b6a4	f5c	uncalled4	2.17301e-05	0.00218078	0.787282
044578d5-c09d-469a-8b63-db01ff1153c0	f5c	uncalled4	1.84682e-05	0.000876678	0.786506
0447320d-3234-4290-bebe-c38db387b0c2	f5c	uncalled4	1.14139e-05	0.00166984	0.777095
04476698-b5fe-478e-b0e8-602cf8438f8b	f5c	uncalled4	2.98321e-05	0.00375735	0.78082
04478596-a96d-4920-af5f-656db32a4fb9	f5c	uncalled4	2.70118e-05	0.00178759	0.786688
0447ac01-f4c7-487b-8957-3c05bb5f2ae2	f5c	uncalled4
0447ccea-1031-4eb8-9c02-f92c2d560395	f5c	uncalled4	1.58883e-05	0.00409965	0.782372
0448fca6-763f-4b9d-a563-5f24b81ebf62	f5c	uncalled4	1.55502e-05	0.0021682	0.789994
0449cf5a-8465-4327-b5aa-cb33f1d401ad	f5c	uncalled4	1.97724e-05	0.00371601	0.769484
044a2f99-083b-4700-b009-fc9f1c63bbf7	f5c	uncalled4	2.58457e-05	0.00529059	0.771301
044aa1f2-cfd7-46f9-9ab7-d91883182be3	f5c	uncalled4	1.42944e-05	0.000900231	0.777155
044af6f3-b8c8-437f-b8ab-4012155edc99	f5c	uncalled4	3.78572e-05	0.00674761	0.774677
044b1523-0505-468b-80c5-091c9b482056	f5c	uncalled4	1.92773e-05	0.00146168	0.803368
044f569a-f67d-4c1f-b32f-48a573c7c814	f5c	uncalled4	1.31113e-05	0.00170668	0.808447
044fbeee-1515-487c-a4e7-c197096cb599	f5c	uncalled4	1.19269e-05	0.00287201	0.779214
044fdeb7-7fc3-4b7e-aa38-a97911a4dafc	f5c	uncalled4	0.00819542	0.115815	0.674324
044fe2e1-217e-41f6-99d9-e99109cabbb9	f5c	uncalled4	1.23605e-05	0.00135004	0.776925
04502a02-42d2-49ff-b7f7-67315d13cef1	f5c	uncalled4	3.78188e-05	0.0121949	0.76177
04509335-36a9-43f9-8f5b-7d969a99d8b2	f5c	uncalled4	1.97629e-05	0.00278827	0.78773
0450da04-a54c-4908-a2bb-5d8893b984e8	f5c	uncalled4	2.98572e-05	0.00368844	0.766726
0451f9ed-9478-4dbf-88e1-820ddf0a2e67	f5c	uncalled4	0.0099802	0.2092	0.619599
045285b6-1a10-4d02-a486-37b9d7d06e10	f5c	uncalled4	1.33796e-05	0.00276039	0.787704
04536a55-7ed3-40d1-9a5b-d4f21cbb6571	f5c	uncalled4	1.68028e-05	0.0025016	0.772165
045378c5-17ac-4cf0-8bc3-d4b769c7fc71	f5c	uncalled4	1.03644e-05	0.00198396	0.794695
0453ea48-8dca-4ce8-9cd4-77d4ef22a656	f5c	uncalled4	1.80521e-05	0.0063157	0.763229
0453ffb7-43e1-45f1-8367-93815bc09583	f5c	uncalled4	2.64794e-05	0.00383846	0.74859
0454e211-0735-4d7f-9ca0-ce69afc13232	f5c	uncalled4
04552fae-c76b-471c-9204-8df89675d46c	f5c	uncalled4	1.33676e-05	0.00456821	0.793903
0457c8b8-db26-4cf6-933d-d9e57101592d	f5c	uncalled4	2.2879e-05	0.00233219	0.780924
045867e3-9483-49aa-8668-d7d9705071ab	f5c	uncalled4	1.54405e-05	0.0072022	0.787315
0458bd7d-f83b-46d0-b3e9-bc1f9a0ff565	f5c	uncalled4	1.70462e-05	0.00105169	0.765774
0458c6af-db65-415a-b6c0-ae34405a30f6	f5c	uncalled4	2.81226e-05	0.00732232	0.760464
04591179-3c60-4258-883b-23969f3668e5	f5c	uncalled4	1.12278e-05	0.000839999	0.773505
04597daa-9e37-4941-b1cd-5ac6b1b13d4b	f5c	uncalled4
04598a6d-b75c-491e-9aee-fb9a3e0be36b	f5c	uncalled4	1.55327e-05	0.000702302	0.78642
0459dfa8-bebf-4e24-a35c-172b4b4ec361	f5c	uncalled4	1.22595e-05	0.00114959	0.788139
045ba238-bb1f-41df-84c0-4c8e5e0f7ba7	f5c	uncalled4	2.05643e-05	0.00157269	0.791772
045c4719-6691-4c1e-8c0d-fed9171d0086	f5c	uncalled4	1.64517e-05	0.00316485	0.780284
045ce846-39a9-4592-9135-6a7ffff4b062	f5c	uncalled4	9.58052e-06	0.000753325	0.782267
045ebf00-93be-451d-850e-daabc772534e	f5c	uncalled4	1.2814e-05	0.00192036	0.772692
0460c806-c8f5-4d6f-9da3-a0abf5333f54	f5c	uncalled4	1.69724e-05	0.0008466	0.790926
046137ea-0d1f-4000-8739-4eed292724de	f5c	uncalled4
04616f84-041e-4fcc-aa33-a9d553012f7b	f5c	uncalled4	1.36059e-05	0.00133622	0.777706
0461f875-7326-45db-85d1-3576168eb64f	f5c	uncalled4	1.52762e-05	0.00184952	0.775803
0462541c-e46a-4f5d-a0dc-367e4fa81a2f	f5c	uncalled4	1.72978e-05	0.00220962	0.785985
04637a7b-9bd3-4dff-a4ac-6a35efaf221b	f5c	uncalled4	1.29516e-05	0.00215883	0.766199
0463d07d-7ee8-4b3a-9943-502a09475fec	f5c	uncalled4	1.12755e-05	0.00114537	0.778926
04649240-7619-48c1-8111-61f4608df45b	f5c	uncalled4	1.26938e-05	0.00514349	0.802902
0465d3c8-5126-4919-9c03-82ce60ba52c6	f5c	uncalled4	3.82401e-05	0.00240154	0.667339
0466ada6-dbc1-4a83-b8fc-d886a806e8d2	f5c	uncalled4	1.30249e-05	0.00231068	0.782131
04673c0c-ab13-4c17-b317-ed167770eda9	f5c	uncalled4	2.87483e-05	0.00389782	0.774112
0467ddc5-a2e3-46a0-87ff-1ba1521fb555	f5c	uncalled4	3.38471e-05	0.0017997	0.753319
0467e7ae-d15e-4ed8-8935-237ca03d2b79	f5c	uncalled4	1.19146e-05	0.00554688	0.789187
0467f241-4caf-4b54-b398-4c2e4dd95d86	f5c	uncalled4	1.62758e-05	0.00179595	0.77721
0467f245-65a4-4613-a95d-096d494614ae	f5c	uncalled4	1.8774e-05	0.00266499	0.783481
04688fb4-2989-4dcd-9a77-7b3545c17610	f5c	uncalled4	1.58562e-05	0.000687998	0.781886
046908d4-8a6a-43fd-989e-9b310debcea6	f5c	uncalled4	1.58303e-05	0.00176256	0.782391
046aabf1-480b-4480-9e5f-384ae33a14ad	f5c	uncalled4	2.34032e-05	0.00894525	0.790578
046b2858-5225-40f3-82b9-180814837c77	f5c	uncalled4	9.20574e-06	0.00109433	0.793242
046ba03a-cee5-4366-9804-6592293c0df5	f5c	uncalled4	1.69286e-05	0.00298482	0.788485
046c6b5d-1be2-4653-aa57-fb907233f4db	f5c	uncalled4	0.000590522	0.253309	0.658075
046ca9c5-08a5-4a06-9e6f-9265105c1d7d	f5c	uncalled4	1.40307e-05	0.0033557	0.78847
046dbcdb-82cd-4ba2-b591-6b5b7229287f	f5c	uncalled4	1.04564e-05	0.00148471	0.791094
046dcb06-9b5c-4386-8544-a377999ee5fd	f5c	uncalled4	2.5321e-05	0.00444965	0.719297
046e23b6-edb8-4862-a910-a8fb6d26c17e	f5c	uncalled4	2.48593e-05	0.0100797	0.772311
046e29da-1977-4bfb-b287-ef35b252f5f1	f5c	uncalled4	1.85527e-05	0.00630378	0.802828
046e9fbb-2ec3-45c4-94fb-fe2f6f12e202	f5c	uncalled4	1.26471e-05	0.000988733	0.774195
046f2f5a-dd7f-43b5-9d7c-c0b70d8b5e15	f5c	uncalled4	2.61021e-05	0.00201436	0.797434
046f5ec3-cb8b-4405-8fcc-8c85d2a4e449	f5c	uncalled4	1.41434e-05	0.00162349	0.794901
0470d0c4-7cad-4113-9ffc-f03e1c726f62	f5c	uncalled4	1.20728e-05	0.0011839	0.784534
04717743-5970-49ff-b4ad-014e1a208e7e	f5c	uncalled4	0.000179	0.012467	0.746672
0472ef03-9e11-4522-bddb-ce2e1fe8ead0	f5c	uncalled4	1.46862e-05	0.0018143	0.73506
0473ef9f-1021-48d9-be7e-b36dc1d1b52d	f5c	uncalled4
04759b25-36d6-4d9e-814b-02f71118241e	f5c	uncalled4	1.03261e-05	0.000779108	0.780809
0475c24d-ff93-4a7d-bbc6-5fedbac864bd	f5c	uncalled4	1.35065e-05	0.00119958	0.79743
04774e33-cd27-447a-9c65-8e7e4a4005cb	f5c	uncalled4	1.22095e-05	0.00143779	0.769418
0477b67e-854a-4568-822a-af129ba7a2fc	f5c	uncalled4	1.07781e-05	0.00239334	0.787823
047878f3-4057-4d16-8d62-739db67f982f	f5c	uncalled4	1.19646e-05	0.000706668	0.782843
04787c82-5202-4b14-828e-6d350e3b030c	f5c	uncalled4	1.989e-05	0.00135395	0.810773
0479179d-0a11-46ce-a142-fcc43d185520	f5c	uncalled4	1.28837e-05	0.00172679	0.760338
04794c3c-fe3e-4a73-b2a6-176a3ede6a86	f5c	uncalled4	1.26448e-05	0.00304064	0.787489
04798343-f636-4a4d-b0cd-fd6e2818a6ae	f5c	uncalled4	4.50145e-05	0.00932067	0.761992
0479b0eb-f464-4c73-b885-3989861c8412	f5c	uncalled4	0.0142981	0.0461821	0.38891
047a49ae-4d28-4f76-8c6b-6e40d6a05c63	f5c	uncalled4	1.43258e-05	0.00259274	0.779523
047b5c0d-8c04-4848-abca-62c0f6c9f940	f5c	uncalled4	0.0377932	0.0544622	0
047b9628-8c95-4de8-bd24-a0b3690f4650	f5c	uncalled4	2.55783e-05	0.00107935	0.778405
047bab34-8cdd-4c4c-95e4-45c635c0fb0c	f5c	uncalled4	1.71805e-05	0.00322741	0.776656
047bc839-362d-4e98-b77a-c54ceb1b037e	f5c	uncalled4	3.18852e-05	0.00168239	0.749568
047c57fb-4c43-4ae1-9420-7c4b6f1953ee	f5c	uncalled4	3.06545e-05	0.00503806	0.780002
047c59e8-84a6-476c-b8bb-d9974f44e7db	f5c	uncalled4	1.14323e-05	0.00366015	0.771031
047d86fc-9a7e-48ee-a11b-7a5f4809e0b6	f5c	uncalled4	1.63428e-05	0.00288123	0.76073
047d8bbb-61a9-453c-ab79-71111347fc25	f5c	uncalled4	2.17048e-05	0.00423178	0.781437
047e4bf0-d8fc-4264-a754-cf45c4033645	f5c	uncalled4	2.72835e-05	0.00256537	0.786166
047eb2a1-576e-4da8-a743-2214d5479e81	f5c	uncalled4	2.4414e-05	0.00441904	0.76891
047faa54-57d4-469c-a4a9-031f0b8e4576	f5c	uncalled4	2.57541e-05	0.00147739	0.780679
048004fb-65f3-43f5-b764-f3cf2d32118b	f5c	uncalled4	5.05953e-05	0.02606	0.764354
04815041-27cf-44e4-9866-9fb04ac1b25e	f5c	uncalled4	1.70061e-05	0.0014226	0.773269
04815f9b-6bb6-423d-9a36-9db089f16f93	f5c	uncalled4	1.44892e-05	0.000823341	0.778523
048163e1-126a-4d37-839f-a9e60a9a4279	f5c	uncalled4
0481b4e7-6f37-45dd-b398-17428fe33d79	f5c	uncalled4	4.1712e-05	0.0128876	0.762034
0481d4f3-74f3-4960-baa8-1b12e014ff0e	f5c	uncalled4	1.37251e-05	0.00218251	0.775979
04838e26-f3a0-42fc-b415-0d17476f60cf	f5c	uncalled4	9.42228e-06	0.000817611	0.786116
0483ffc6-b183-43da-b076-47701186779f	f5c	uncalled4	1.11434e-05	0.00149547	0.784016
0484a6e9-ed83-4cef-ae19-7ba48007f2d1	f5c	uncalled4	2.91253e-05	0.0021178	0.784651
04857dbd-9a14-44b5-a268-b55fff3da1f3	f5c	uncalled4	1.39632e-05	0.00161031	0.790777
04859f68-dd18-412a-99b7-a220e6f489c3	f5c	uncalled4	2.52996e-05	0.00197164	0.77536
0486afe8-f075-425c-8e31-1b1fbdfe1f5e	f5c	uncalled4	2.44846e-05	0.00608112	0.808047
048715dd-cabe-4145-a902-3c20cfbbf52b	f5c	uncalled4	1.48879e-05	0.00100542	0.793558
048891bc-77a8-45bd-a868-320a4f3ef8d7	f5c	uncalled4	1.11595e-05	0.00194834	0.786697
0488d391-c2d0-42d6-8ede-62425bdbae79	f5c	uncalled4	2.8857e-05	0.00482339	0.766424
04891c0d-e54e-4ce0-8c61-ca018e09d804	f5c	uncalled4
048b4fc5-139e-446d-8004-ed84c4ccd39d	f5c	uncalled4	0.0195925	0.0324623	0.00727584
048b70d3-2b64-4481-b04d-8dabcd117072	f5c	uncalled4	0.00338207	0.0262363	0.509345
048bb12b-ec24-4afa-8a39-12f962d4177a	f5c	uncalled4	2.09566e-05	0.00371678	0.765785
048c6a20-b414-417e-92d2-5aac94c19fd2	f5c	uncalled4	2.45124e-05	0.00206065	0.7786
048cbd0c-7108-445d-9705-3d38c66fa245	f5c	uncalled4			0.703089
048cdd37-f5ac-478f-b083-0ab21a7efa6a	f5c	uncalled4	1.91142e-05	0.00148191	0.788152
048e33f6-5c70-44d8-816d-eb9d3156b60b	f5c	uncalled4	0.0109822	0.123391	0.656645
048e4cd0-b28a-4c71-b1f8-c7c6f8c9a809	f5c	uncalled4
048e87d4-9fe3-42b0-9c8a-58d9c6a5a45c	f5c	uncalled4	2.2343e-05	0.00359807	0.755365
048edaa1-a438-4e1d-8e8c-b95a93e6ea18	f5c	uncalled4	1.84668e-05	0.00327512	0.774639
048ee3f8-8f6b-495f-bcdd-c5dae917d1f3	f5c	uncalled4	2.3308e-05	0.00103508	0.76589
04909df7-088f-44b9-9ad3-1350d6be0cfa	f5c	uncalled4	1.00021e-05	0.00162701	0.797344
04923831-6e61-4479-bf61-049ee306800b	f5c	uncalled4	1.39765e-05	0.00118896	0.792138
0493060f-996b-4f4a-8542-a71f5d49fc67	f5c	uncalled4	3.14232e-05	0.0104524	0.778423
04947b2c-e2cd-40e4-91fd-73dc6c23c49e	f5c	uncalled4	5.86359e-05	0.00245734	0.691283
04957e50-b614-41af-a8b9-9be68d9390ca	f5c	uncalled4	2.16772e-05	0.0021373	0.781505
04972bca-c58f-42a9-ac26-a537a95444dc	f5c	uncalled4	1.84729e-05	0.0020191	0.767427
0498f1f7-8a9b-4c75-98bd-b5833745220c	f5c	uncalled4	2.39403e-05	0.00177925	0.717164
04991125-c690-44a7-b3c8-f32f0e5fb664	f5c	uncalled4	1.30356e-05	0.000826345	0.771063
0499d568-b211-4c98-8d9b-40d04ab70abd	f5c	uncalled4	9.02611e-06	0.00336008	0.835636
049a7f19-552a-4e32-ab31-756e25e2ac2a	f5c	uncalled4	1.5347e-05	0.00162256	0.774632
049be21e-2021-452d-ace2-f221d44a3acb	f5c	uncalled4	1.15642e-05	0.000591928	0.790147
049bf9b5-61a3-40e0-a3eb-66e04e7d12e0	f5c	uncalled4	2.40073e-05	0.0014998	0.778574
049d8e19-5380-4d67-926d-c02b3923ee8a	f5c	uncalled4	6.63358e-05	0.0173735	0.776078
049dcacb-857f-40af-bf50-1515ba02f599	f5c	uncalled4	1.70784e-05	0.000939105	0.765608
049ddd87-e98e-4088-8426-b20cb069fc89	f5c	uncalled4	1.73634e-05	0.00340877	0.780941
049e843b-8f45-4226-8771-1b6fee5ca5ba	f5c	uncalled4	2.41932e-05	0.0016757	0.802384
049e89fb-bc83-416c-9eac-d7572ef78777	f5c	uncalled4	1.35005e-05	0.000770408	0.797424
049eb4d3-c168-40ba-b0fe-88c96f0c2646	f5c	uncalled4	1.49318e-05	0.000761107	0.810497
049ebcf1-e3ad-4898-aa70-eabea25799f1	f5c	uncalled4	1.18741e-05	0.001297	0.774599
049f4930-ca73-4e26-b8c7-3dfd213b025a	f5c	uncalled4	1.50126e-05	0.0034258	0.785993
049f678c-b047-47da-894a-c93be1bbcd4b	f5c	uncalled4	2.28395e-05	0.00893336	0.772539
049f8f67-dff0-48bc-83a8-5ff45757eb38	f5c	uncalled4	2.00148e-05	0.00465373	0.777224
04a08e65-140e-4ae3-84a9-b112316a6d19	f5c	uncalled4	1.38878e-05	0.000951408	0.785089
04a0a4e2-eb6b-42a1-87f3-9843a7cfbeb4	f5c	uncalled4	0.0207432	0.0516692	0
04a1267c-704e-4eae-a27f-663efa7ab30f	f5c	uncalled4	1.2183e-05	0.000766401	0.768856
04a15bcf-19f4-4806-adca-fb39741b2668	f5c	uncalled4	1.35199e-05	0.0005703	0.790195
04a15c34-3af7-44ab-b38e-f1d55fd94a20	f5c	uncalled4	1.66346e-05	0.00231589	0.778902
04a23f2e-eee1-4d7a-bc67-2c30727b8738	f5c	uncalled4	3.49347e-05	0.00777649	0.779224
04a2fdc2-1985-43cc-8975-ad60ff68e0bb	f5c	uncalled4	1.85542e-05	0.00146974	0.762368
04a37919-b8aa-4fbb-8afa-eb38f8bd616f	f5c	uncalled4	2.76672e-05	0.00900071	0.778406
04a38b5b-1c19-4d4f-bcf6-6b865ce6005a	f5c	uncalled4	1.17307e-05	0.00129786	0.787894
04a4d6b9-b359-4934-ba68-dda5dce2f0b8	f5c	uncalled4	1.39848e-05	0.0021194	0.780114
04a50c26-7d48-4697-92e9-56b359d2a0b3	f5c	uncalled4	3.61442e-05	0.00350721	0.72395
04a52f07-c555-473d-ae88-872e27f740df	f5c	uncalled4	1.47769e-05	0.00203011	0.788643
04a6f273-d189-48c0-9bb5-796fd799c337	f5c	uncalled4	1.32934e-05	0.00187176	0.790334
04a72141-d35b-467f-8bab-0624d230acc8	f5c	uncalled4	1.927e-05	0.000989352	0.746459
04a80284-7712-4e91-b877-3de644c0cf5f	f5c	uncalled4	0.00176236	0.397305	0.524371
04a84009-65e1-4e16-8710-a5d3b7bffcb3	f5c	uncalled4	2.01297e-05	0.00162438	0.785464
04a90f0d-6737-46aa-90bb-e8d93d38874f	f5c	uncalled4	4.1127e-05	0.00176187	0.696065
04a91e4e-6592-4063-8469-555e77e13fe0	f5c	uncalled4			0.517744
04a99bf3-f963-4007-9f5a-8470f489e64b	f5c	uncalled4	1.13479e-05	0.00107436	0.772307
04a9ebbb-d210-4fd6-b738-9867bdcd2af2	f5c	uncalled4	1.71398e-05	0.00286061	0.758754
04ab5b5b-c1ef-46b2-87d4-c117017768ca	f5c	uncalled4	1.67189e-05	0.00126547	0.772521
04ac9ccd-9b7d-4340-8c5e-77b766c56101	f5c	uncalled4	1.33483e-05	0.00165467	0.769318
04aca4fd-e94b-438d-a4f7-51b61c741490	f5c	uncalled4	2.12261e-05	0.00127924	0.79369
04adc875-dce5-4c7d-8d66-99de81b5792f	f5c	uncalled4	1.14795e-05	0.00508705	0.778504
04ae4b49-22b8-45b8-a023-4f27fca43ae8	f5c	uncalled4	2.11829e-05	0.00169949	0.786458
04ae8c7b-f2d4-41f4-b4c1-2a912e9417c6	f5c	uncalled4	1.25966e-05	0.00154939	0.784632
04aebc64-0637-4bb5-89ff-44524bebe67a	f5c	uncalled4	1.32843e-05	0.00162464	0.79028
04aec16a-f108-4db0-9079-ee56e9600f50	f5c	uncalled4	1.24725e-05	0.0085299	0.783467
04b00795-c758-47ad-9642-ae5107fcc67b	f5c	uncalled4	1.30735e-05	0.00213349	0.780569
04b123f1-1f72-4fed-bf68-60f948199ba9	f5c	uncalled4	1.92053e-05	0.0045584	0.780278
04b37c6f-f71a-4a36-ad3d-9e159f6f8c30	f5c	uncalled4	1.42318e-05	0.00268375	0.775406
04b4c43e-659a-4276-9064-c5c986f7f67b	f5c	uncalled4	2.59729e-05	0.00526932	0.779062
04b4cc83-4086-4f59-8aaf-906d76cf4dd2	f5c	uncalled4	1.7008e-05	0.00102711	0.77478
04b4e397-a0d5-4a94-975c-51eb5c8aeac3	f5c	uncalled4	1.16973e-05	0.000799097	0.793196
04b5c5ce-1b50-470b-815b-eca284cea725	f5c	uncalled4	0.00167108	0.411219	0.686072
04b6d3f0-b27e-4855-a871-89c49343b1da	f5c	uncalled4	0.00413681	0.140393	0.648407
04b769d4-4524-4f83-90fc-c599089cae6f	f5c	uncalled4	2.7543e-05	0.00746951	0.769135
04b7b37e-0159-43cf-88fc-2f03b77a94b5	f5c	uncalled4	2.34887e-05	0.00169158	0.790149
04b8366e-49b3-4508-9c8a-f002a14705e9	f5c	uncalled4	2.90625e-05	0.00282665	0.749919
04b86540-391b-43d3-95ce-d2599cf68e40	f5c	uncalled4	3.1645e-05	0.00503076	0.777716
04b8af71-c4aa-40c9-b694-93e84bc25e2e	f5c	uncalled4	0.000312953	0.222544	0.577085
04b93254-526f-4227-8a5f-2df16ad18b8e	f5c	uncalled4	1.48011e-05	0.00120063	0.768794
04b992cb-a771-4f12-9110-83b0f408c67d	f5c	uncalled4	1.31271e-05	0.000791178	0.797745
04bb4ca8-72b2-4f46-b2b6-163a7ab429da	f5c	uncalled4	1.13856e-05	0.000822875	0.797855
04bbc789-31de-468c-8b3f-3d37ccb741a1	f5c	uncalled4	1.51175e-05	0.0037633	0.792087
04bc3c98-6fe3-4946-9891-5c7c118f4001	f5c	uncalled4	9.60711e-06	0.000664888	0.784214
04bc5a41-d208-4076-bc8d-b00b915cb1e0	f5c	uncalled4	1.34782e-05	0.00141634	0.785462
04bd7923-309a-4c00-85bf-48d95fedc77f	f5c	uncalled4	1.08961e-05	0.00162343	0.799346
04bdaf4b-2936-4722-9ae6-3772dc74b276	f5c	uncalled4	1.15045e-05	0.00158303	0.765899
04be24d3-f3d4-48d4-9294-144184822519	f5c	uncalled4	1.15618e-05	0.00136225	0.784638
04bedcaa-bdee-4ae6-9310-67732cf17bf5	f5c	uncalled4	1.12348e-05	0.00126258	0.779417
04bfd2d9-adcc-4afb-b281-6a22a13c0ad8	f5c	uncalled4	1.21291e-05	0.00166286	0.771327
04bfd6a0-4757-47fe-8e29-fb4ce5a1cacb	f5c	uncalled4	2.76969e-05	0.00151324	0.772324
04bff127-a8d5-48f8-b228-25a8d061978e	f5c	uncalled4	1.22686e-05	0.00253247	0.781156
04c07ce3-9839-41c3-8c8e-36bed8742cdd	f5c	uncalled4	1.28512e-05	0.000772232	0.750091
04c0fe96-8ef9-44dd-982e-50b90d24fd30	f5c	uncalled4	1.36699e-05	0.00133408	0.78743
04c19090-3e35-4755-b8a1-c9e1139be0c0	f5c	uncalled4	3.29249e-05	0.009621	0.778121
04c1aa8f-97cb-45ff-9007-8770aca6ca46	f5c	uncalled4	1.27813e-05	0.00310928	0.770278
04c1f84d-48aa-45e5-88e1-be26729bf6d4	f5c	uncalled4	0.000734922	0.296974	0.756317
04c3280c-e9da-4f1e-8dc5-cad304e5a141	f5c	uncalled4	1.13093e-05	0.000922766	0.769646
04c3c5c6-29cc-4e18-af19-f019aedb830e	f5c	uncalled4	1.88206e-05	0.00275725	0.777461
04c5280f-950e-4a48-9bb0-e53139b8d333	f5c	uncalled4	2.69868e-05	0.00173746	0.733182
04c5d821-4132-4eae-9aaa-8332d9aa0afc	f5c	uncalled4	1.23946e-05	0.00491728	0.767018
04c80100-a8bd-41c1-ba0b-230df560783c	f5c	uncalled4	3.01626e-05	0.00128828	0.732485
04c89c08-dda5-49b7-8014-a165ab458b9e	f5c	uncalled4	1.55115e-05	0.000662155	0.776935
04c8ef72-64b3-4a9e-a8a4-f108d5222f5c	f5c	uncalled4	1.55728e-05	0.00468902	0.791682
04c97f94-8aef-4992-9ee0-4be214e8d743	f5c	uncalled4	9.20461e-06	0.00131257	0.788894
04ce3b53-ea40-4ae9-9d62-50eea3e4f476	f5c	uncalled4	2.12055e-05	0.00285806	0.796
04cebf3f-67d4-49a6-90f5-80ee845fc431	f5c	uncalled4	2.69369e-05	0.00439453	0.769291
04d05ad2-3777-4a58-8b25-e910fa1540a7	f5c	uncalled4	9.79214e-06	0.00118796	0.792275
04d0db7c-4aac-4302-bedc-0cecbeceaedd	f5c	uncalled4	1.61916e-05	0.00189358	0.774261
04d10309-45b4-4f44-bf92-d13e038af408	f5c	uncalled4	1.93158e-05	0.00828582	0.759012
04d14d1d-6c42-42bc-a32d-a5f7be03b3b1	f5c	uncalled4	1.70892e-05	0.00269846	0.779393
04d2e524-09a6-4cdf-b8e3-1cac312bf6bb	f5c	uncalled4	1.16863e-05	0.000906596	0.782387
04d560ed-595f-48b7-944c-5a8612ccf2f0	f5c	uncalled4	1.44353e-05	0.00304368	0.786295
04d5acfb-d80a-405c-8959-06bc4ac02819	f5c	uncalled4	9.80291e-06	0.000698595	0.779582
04d5bce5-d556-48d1-8ab4-47079030b945	f5c	uncalled4	1.23227e-05	0.00248578	0.779408
04d5de78-6b29-4684-ac3b-72b534644faa	f5c	uncalled4	1.73005e-05	0.000986601	0.768039
04d678bf-659e-4118-991a-1c3ab614b909	f5c	uncalled4	1.6193e-05	0.00370931	0.778427
04d68a86-e455-4daf-94a5-ef233c8201a6	f5c	uncalled4	2.5787e-05	0.00150796	0.791534
04d75e5c-2667-4b00-bb1a-88b30db84ee1	f5c	uncalled4	3.11659e-05	0.00315555	0.752162
04d7e63c-c9ce-40e1-9958-449858cc142f	f5c	uncalled4	2.23739e-05	0.000797527	0.780275
04d84e46-7b15-4244-bb33-8e4fbf73fc9a	f5c	uncalled4	2.52969e-05	0.00171621	0.788344
04d9d67d-13a8-4bca-9724-cd6d2ff59992	f5c	uncalled4
04da2b8b-a604-4861-bef0-15421dad11eb	f5c	uncalled4	2.67981e-05	0.00651964	0.801963
04dad84c-d1f4-43f5-9161-55aa4382e963	f5c	uncalled4	2.51415e-05	0.00134919	0.772037
04db7249-9ba2-462e-8b28-2254706fedc3	f5c	uncalled4	1.6646e-05	0.0011056	0.777864
04dbc8ab-9139-4d84-8b9a-7e58fbf1e644	f5c	uncalled4	2.33347e-05	0.000932801	0.795759
04dc3247-b3af-4e94-bb1e-13d8ae97f092	f5c	uncalled4
04dc7b4e-f562-47be-914f-bf518d14714c	f5c	uncalled4	2.39255e-05	0.00366225	0.795602
04de3c30-fe25-4576-be05-48e334a97010	f5c	uncalled4	2.48923e-05	0.00523125	0.782779
04de692a-6e36-493f-a226-e7c16b60bb59	f5c	uncalled4	1.84316e-05	0.00457109	0.784466
04dede81-8b37-4089-a0ca-de2c2af36fb4	f5c	uncalled4	6.07627e-05	0.0220828	0.740633
04df4d8b-86fb-4f18-9133-93bbcd9aad4f	f5c	uncalled4	1.62122e-05	0.00347941	0.764109
04e1860d-993c-4ba3-980f-ce6c2510b504	f5c	uncalled4	1.13615e-05	0.00159354	0.774738
04e29c7a-16ae-49b5-b72f-efa9fef50567	f5c	uncalled4	1.28205e-05	0.00271173	0.788863
04e31bd6-72a2-47aa-a969-3f0316406baf	f5c	uncalled4	2.17945e-05	0.00226609	0.756816
04e3d247-b1d4-42de-8da6-94412f90dd99	f5c	uncalled4	1.30687e-05	0.00120187	0.773321
04e52efa-be71-4336-a774-132d4cbdee50	f5c	uncalled4	0.00607206	0.0155091	0.307484
04e76533-273b-48fe-bbe7-1ad8223558f9	f5c	uncalled4	2.16774e-05	0.00180149	0.785498
04e79d5f-ce8b-4ed5-a932-cc8485db26d6	f5c	uncalled4	1.52562e-05	0.00255752	0.78006
04e8d594-cb3f-432d-9217-9d5c3372a9af	f5c	uncalled4	1.49417e-05	0.00121063	0.775446
04e9154d-3b99-4705-8f07-68b1c8c58136	f5c	uncalled4	1.638e-05	0.00306825	0.780984
04e9c3cb-bb77-4bb1-aa0e-0675e1dd2209	f5c	uncalled4	0.0343444	0.0729675	0
04e9c607-bb07-4646-8169-e3205d6027f7	f5c	uncalled4	1.83001e-05	0.00179693	0.763231
04eaee39-5db5-4ee6-bdc9-fee0d0e06697	f5c	uncalled4	2.23794e-05	0.00325108	0.732327
04ec1134-1742-4275-a7a7-62d9de37bc98	f5c	uncalled4	1.67382e-05	0.00680744	0.773137
04edf02e-baac-40c5-b0d6-80bfbf42c21c	f5c	uncalled4	2.61133e-05	0.00249185	0.76645
04eef467-44f2-4ed9-902d-6466e50c541c	f5c	uncalled4	2.51101e-05	0.00180726	0.797991
04ef4a38-8223-4eb0-877c-c9b06a867e63	f5c	uncalled4	2.38092e-05	0.00428108	0.777435
04ef75d4-1f10-4bcd-aaac-8a2f76ba408e	f5c	uncalled4	2.68991e-05	0.00285736	0.779479
04efdf2a-65d0-44ef-bd79-fc39b42e4b44	f5c	uncalled4	1.6636e-05	0.00388308	0.782023
04f0b4fa-b142-47f5-8b60-728572488497	f5c	uncalled4	2.65728e-05	0.00571597	0.780823
04f20080-8e7a-4525-b4ee-68debffd2488	f5c	uncalled4	1.19286e-05	0.00171492	0.78367
04f2d365-ee2c-4b91-8dda-aa61147c843a	f5c	uncalled4	3.51519e-05	0.0139686	0.798111
04f475b9-a337-4974-b122-20541ff880b1	f5c	uncalled4	2.12727e-05	0.00144688	0.787447
04f68bc9-77c9-4389-9918-ab195630284b	f5c	uncalled4	2.19376e-05	0.00172107	0.752457
04f855db-a05e-4061-b03a-65c2eb926c4d	f5c	uncalled4	1.50313e-05	0.00106605	0.76975
04f88d9f-da0f-4c76-b70a-563b2fc45c58	f5c	uncalled4	1.36087e-05	0.00215794	0.773302
04f909dc-a612-42db-be79-ae922e5742f3	f5c	uncalled4	5.57212e-05	0.00188812	0.608315
04f95a60-8a95-42eb-a0b5-104c26a521bd	f5c	uncalled4	3.15778e-05	0.0026443	0.784481
04f9bc73-1465-45ab-a993-559f5c5665a5	f5c	uncalled4	1.4267e-05	0.000546964	0.76192
04faafdf-9fc5-45f1-8111-62f68b0f9756	f5c	uncalled4	1.04551e-05	0.000921834	0.784793
04fcd5f7-20fc-45d1-8d1b-f4758e70aa37	f5c	uncalled4	1.31361e-05	0.000756799	0.793896
04fd55e2-2304-4883-bfb8-927c3aa76094	f5c	uncalled4	3.69315e-05	0.00424761	0.752501
04fe0394-7933-4d57-8d78-0a141b290862	f5c	uncalled4	2.57806e-05	0.00114801	0.789474
04fef76d-906f-4154-b85f-e5ff8a832b0a	f5c	uncalled4	1.14388e-05	0.00092149	0.779248
04ff0a1b-282e-4487-886e-cd638e12bb5f	f5c	uncalled4	1.87788e-05	0.0026713	0.774614
04ff1b3b-0a58-4ffc-9ced-7b21dc8c913c	f5c	uncalled4	1.19311e-05	0.000845032	0.787056
04ff2e02-7bb8-40d3-b15f-55b77d061fca	f5c	uncalled4	2.50736e-05	0.00347125	0.770602
0501a875-f9cd-4076-bb3b-d00badf3896b	f5c	uncalled4	2.90751e-05	0.00450146	0.776089
0502720e-1e10-4a0e-b35f-7d8bd4c075ba	f5c	uncalled4	1.17364e-05	0.000784	0.771561
05057a4a-b8b3-4293-9783-1544698ab8a2	f5c	uncalled4	4.63261e-05	0.0148317	0.760083
05063ffd-7aa3-4eb0-a4e4-4b2652301b51	f5c	uncalled4	1.7112e-05	0.00154004	0.773206
0506b20b-b826-46eb-84f0-86828b8c1dc2	f5c	uncalled4	4.08347e-05	0.00994822	0.761586
0507605d-4c81-4e4d-b306-8c902eabb5e6	f5c	uncalled4	3.17442e-05	0.00300771	0.722025
05078db5-ed73-4488-8e7d-53a0324e7aba	f5c	uncalled4	2.55374e-05	0.00315599	0.718091
050790fd-1287-44e3-aab4-c30c2e965c00	f5c	uncalled4	0.00299479	0.0593043	0.691738
05079874-d750-44b9-9164-8a7d880fd975	f5c	uncalled4	1.30314e-05	0.00100389	0.776842
0507b072-0b17-4d96-b8b3-26aa77e733a3	f5c	uncalled4	1.32342e-05	0.00113914	0.773269
05090d7e-9056-4b20-ac8e-cac1ce347d15	f5c	uncalled4	2.62172e-05	0.00204642	0.693191
050942a2-c328-42ab-9589-1174b80ddf3c	f5c	uncalled4	1.38062e-05	0.00124464	0.779615
050b1353-2fb9-4d49-a2cc-1047e432a830	f5c	uncalled4	1.69346e-05	0.00238956	0.779334
0510bed6-2816-4d41-b27b-604e4581b019	f5c	uncalled4	1.10597e-05	0.00183441	0.792799
0510f976-7dde-4a23-97b4-d1342917fc3b	f5c	uncalled4	3.48306e-05	0.00730403	0.781429
05113f4b-11b2-45c2-8bde-898449cf25fa	f5c	uncalled4	1.33329e-05	0.00309204	0.765766
05114fae-f733-4050-bb00-948fec6c889c	f5c	uncalled4	1.78507e-05	0.00949113	0.796478
05124871-5097-4e2f-ab20-46f12e2fbcbe	f5c	uncalled4	7.54233e-06	0.00125376	0.839079
0512ee77-acd8-4a5b-902f-39d17a0eb412	f5c	uncalled4
0515c6d0-32ea-48a5-a0a4-988174c381c5	f5c	uncalled4	0.000413318	0.232591	0.725306
0516b7f7-6b10-4d2c-8dab-28972f57e130	f5c	uncalled4	3.1422e-05	0.00293873	0.770653
0517bfe0-4620-4860-ae92-cce888a289e4	f5c	uncalled4	2.11556e-05	0.0071643	0.782388
0517f4cc-0416-4c95-9d4e-0b075c5f5526	f5c	uncalled4	0.130166	0.256607	0
0517fc98-5a7c-412b-a737-105d083ee88a	f5c	uncalled4
051816cf-821b-426e-913e-41197ac20f7b	f5c	uncalled4	1.1991e-05	0.00102463	0.758946
05183f88-f318-49d8-8d3a-012327a00117	f5c	uncalled4	1.24227e-05	0.00333108	0.785947
0518b1a7-5a49-4e46-96f3-3a55d18a32b6	f5c	uncalled4	2.36256e-05	0.00567098	0.793378
051924f6-5a67-4187-8081-83b7a758abfe	f5c	uncalled4	1.7023e-05	0.00193088	0.773286
051b3966-8e84-45fc-b165-ccae6341e9c5	f5c	uncalled4	2.0626e-05	0.00116723	0.751453
051b74ee-ee56-4397-96e3-c426ca62ed4d	f5c	uncalled4	1.25035e-05	0.00183937	0.785367
051b9e75-4715-4eef-858c-600885b38b81	f5c	uncalled4	1.96559e-05	0.00150001	0.773715
051c22e0-8def-4dc4-a669-44af96b8a776	f5c	uncalled4	1.89334e-05	0.00132924	0.784301
051d02d1-3aab-42fb-ae47-12eb4a7286cb	f5c	uncalled4
051e3ac5-0161-4faf-a243-ee8186cbffd0	f5c	uncalled4	1.96978e-05	0.00127787	0.795112
051e4bab-d9ca-4521-adc0-5e9e4f48a8d7	f5c	uncalled4	1.47796e-05	0.000874653	0.774635
051ed90e-0ccc-4880-8de7-6a4f3af24656	f5c	uncalled4	1.40776e-05	0.00192615	0.766397
051edc63-11ab-460d-bed9-2cf958779070	f5c	uncalled4	2.34499e-05	0.00270555	0.765133
051f3f37-513b-4994-921d-b814eaa957fd	f5c	uncalled4	3.34882e-05	0.00357665	0.785816
05201ab9-6fb8-498a-8510-b0ef8d417933	f5c	uncalled4	8.82756e-06	0.000607111	0.784323
05211094-0828-4991-9673-23d033d9defe	f5c	uncalled4	2.60168e-05	0.0081201	0.788125
05227c43-9cf2-40f6-8244-d74596df8528	f5c	uncalled4	1.49535e-05	0.000971639	0.777382
05237d40-ae40-40ba-8588-b62176d6b65f	f5c	uncalled4	1.57329e-05	0.00277677	0.787162
0523d2a0-06ea-4d87-a390-2c44e1d6d9c5	f5c	uncalled4
05248b43-cc28-4abd-ac8c-48dcf320cbaf	f5c	uncalled4	1.15129e-05	0.00155472	0.786585
052548d7-df93-4c1c-9506-2796adf4441c	f5c	uncalled4	0.00123698	0.205916	0.69979
0525edb4-3dcb-45a5-820b-964ff5c665f6	f5c	uncalled4	2.03172e-05	0.000939573	0.79408
05267a5c-e51e-4975-b7bc-63898b7db323	f5c	uncalled4	3.00416e-05	0.00458613	0.774198
[truncated: 198,000+ more rows]

## Sheet: Comparisons ref alignment
read_id	tool1	tool2	norm_mean_diff	norm_max_diff	pct_identical_boundaries
00002f45-5b4d-4b65-8caf-50155965e3d5	fishnet	remora	1.08056e-06	0.00038582	0.968837
00008400-7a12-4ebd-8486-88f6857c560e	fishnet	remora	1.66094e-07	0.000157126	0.988925
0002c0dc-a0ca-49b3-b716-74af70ba21ea	fishnet	remora	2.01562e-07	0.000247718	0.993399
0003f68c-1572-46b5-af5b-c186bb0482ed	fishnet	remora	7.20547e-07	0.000426074	0.972384
000403ed-b627-44c0-968d-738e6cb88831	fishnet	remora	8.34301e-06	0.00557614	0.974417
00051d69-f5e5-4c7c-a1a7-329ae643318f	fishnet	remora	4.7231e-07	0.000356937	0.990614
000541b8-8cb9-4f34-89a3-ccc368514efd	fishnet	remora	1.77546e-06	0.000736179	0.978896
00056d3f-efd2-4a10-95c5-359eef2edbc4	fishnet	remora	3.60495e-07	0.000236387	0.983703
00069494-b7cb-40a9-9b35-40114ad68c0f	fishnet	remora	8.45005e-07	0.000554346	0.971202
00077e2a-1fbc-4ffe-9b41-b8d7599c8ef9	fishnet	remora	2.06033e-06	0.000684198	0.973715
0009b2ab-d794-474b-b48e-e40f5a83baea	fishnet	remora	1.32049e-06	0.000574755	0.966487
0009fce2-9dbe-4fbf-9f67-10785d269d6c	fishnet	remora	4.92276e-07	0.000242752	0.982942
000a6cc4-1827-4c63-931a-704c8a52aade	fishnet	remora	7.54786e-07	0.000324137	0.982368
000a7bc7-edc7-48b1-8bf7-7ff662dec7b1	fishnet	remora	1.29817e-06	0.000677928	0.956404
000b0461-a4bd-4025-94e7-fd57eab179b6	fishnet	remora	3.90431e-07	0.000267931	0.97649
000b7ed0-3927-46e5-a11f-797a32d19668	fishnet	remora	6.05273e-07	0.000397324	0.973375
000d66b5-4a2f-4856-99f1-c817d98435a6	fishnet	remora	5.65017e-07	0.000269143	0.985071
000d88e9-1941-4c20-9bf6-af8e4fa95f94	fishnet	remora	3.77518e-07	0.000363767	0.985652
000deb2e-9de3-4b66-87bd-043d1d0f9b99	fishnet	remora	1.00661e-06	0.000441136	0.972896
000f00c1-380d-495e-b7b3-d58af9d387d6	fishnet	remora	6.95506e-07	0.000398955	0.982808
000fc389-97ba-488e-b1ea-db4ed062bbfa	fishnet	remora	6.26528e-07	0.000241486	0.973374
000fd1ca-4c49-47a7-86fe-ce024c05b808	fishnet	remora	1.1224e-06	0.000572057	0.971473
00101443-5f84-46ca-a73f-f6c6a3bcf4f4	fishnet	remora	6.23147e-07	0.000416032	0.984469
001028da-15f1-42bf-9423-44d2a9829026	fishnet	remora	5.97406e-07	0.00025279	0.975269
00105e68-a65d-4fca-b89e-7fdc98aab958	fishnet	remora	2.76601e-07	0.000415683	0.991891
00114243-630e-414a-8347-f6bce1730297	fishnet	remora	1.50465e-06	0.000653173	0.950863
0011ef61-fe50-4c78-970f-0d42885d18a9	fishnet	remora	6.45456e-07	0.000400707	0.972059
00121f91-cebf-4db7-9274-e8ed5d31b1ab	fishnet	remora	1.8291e-06	0.0017134	0.941197
00124129-7d84-438b-a76c-7e6b7b9edc02	fishnet	remora	5.79986e-07	0.000217927	0.970494
0012797b-d37c-4fd2-92d2-21d914e03f2e	fishnet	remora	8.37649e-07	0.000301073	0.965158
001295f1-2c4d-4af7-90d1-16418699aaf5	fishnet	remora	8.56477e-07	0.000471906	0.980903
0012b983-a88e-4bd5-b7be-aa69a67a0e75	fishnet	remora	1.48016e-06	0.000415999	0.962315
0012f9d5-ff63-49e3-9260-1ee6bb0c32e9	fishnet	remora	6.56176e-07	0.000564714	0.986963
0013ffb8-e67c-4745-84a9-82e325fd2141	fishnet	remora	2.35936e-07	0.000164772	0.994329
0014edff-ec18-47a0-a1ff-a03a1f5398fd	fishnet	remora	8.18188e-07	0.000421847	0.972952
00167450-90e6-417b-9c43-8a778e246712	fishnet	remora	1.64184e-06	0.000743177	0.978896
0016b3e7-dcc3-4720-ace3-1563ccb67398	fishnet	remora	5.51662e-07	0.000364868	0.981202
001803c2-14ca-416e-837a-a86a7d60079d	fishnet	remora	4.35999e-07	0.000196793	0.978307
0018c138-2c42-416a-9678-7f1de26f8049	fishnet	remora	7.3036e-07	0.000438157	0.9813
0018c2ca-de1e-4c8b-9242-0d4e8ddff751	fishnet	remora	1.00999e-06	0.000477736	0.97522
0018ee0d-2267-46bc-9a0b-9bfaa3c22e94	fishnet	remora	8.65778e-07	0.00036796	0.959469
001a0913-1490-45c2-be42-157277f37453	fishnet	remora	1.8545e-06	0.000862948	0.972848
001b210a-05dc-4ad4-ba9e-bbd6c3e9e09c	fishnet	remora	1.32432e-06	0.000523998	0.949065
001bd20f-2701-4144-8f99-41e559174851	fishnet	remora	1.53122e-06	0.000536452	0.958367
001d6662-461e-4d49-9856-070056d3392a	fishnet	remora	5.24261e-07	0.000299373	0.983799
001dac9d-51fa-4514-b2cd-2cfac88a788c	fishnet	remora	2.44003e-06	0.000839266	0.952758
001daca2-9c61-443c-8e18-0d48af6984e5	fishnet	remora	4.87477e-07	0.000584962	0.992392
001e23c2-c464-4da6-805b-02d095d307d9	fishnet	remora	9.96565e-07	0.000495821	0.961938
001e5142-fd4c-49e5-8fce-5c7f8373aa34	fishnet	remora	7.37466e-07	0.000283856	0.977296
001ea0a3-3b42-4bbc-b562-1e7163054d2e	fishnet	remora	3.69704e-07	0.000737499	0.990242
00204705-5c31-458b-a4cb-c282183d3f7e	fishnet	remora	3.8083e-07	0.000262694	0.980606
00215f9b-8f6b-4300-93fc-adde0ee3514f	fishnet	remora	5.60168e-07	0.000336889	0.974588
0021b69d-e30c-4a53-8202-6fe07a038fa0	fishnet	remora	1.39118e-06	0.000452361	0.968057
0021ec21-e9b4-4809-b9fa-12fe7825d505	fishnet	remora	5.16737e-07	0.000280275	0.978402
00220ab9-0f6c-40b8-9703-e5ce086c39aa	fishnet	remora	2.2953e-07	0.00100251	0.995753
00237182-55f9-4aca-b3b2-ebb387bfba33	fishnet	remora	1.1826e-06	0.000611858	0.964571
00237454-d80d-4f15-877e-86bc4b4c6de3	fishnet	remora	3.66967e-07	0.000250464	0.987826
00239563-00af-489e-812e-66e50e1c5f97	fishnet	remora	6.7305e-07	0.000227685	0.975223
0023973d-4fcf-434c-8196-9592b1246843	fishnet	remora	1.29162e-06	0.000495565	0.97054
0023ee60-161b-4714-814b-92a5d99211c4	fishnet	remora	1.14368e-06	0.000770869	0.973693
00255e96-5e68-425b-a1cc-27c2a2872d7d	fishnet	remora	9.93106e-07	0.000353973	0.954502
0025b8ee-7ede-4dd2-9db5-4ffa6795c36e	fishnet	remora	3.68015e-07	0.000219032	0.986348
0025b9f7-24e3-4134-8192-9c6604bbe1ed	fishnet	remora	1.37718e-06	0.000484137	0.964457
0025effa-0142-45fb-8f4a-e786697d42db	fishnet	remora	1.31624e-06	0.00111015	0.962829
00266e88-cf47-4896-9a5d-be8c203eca0d	fishnet	remora	2.92363e-07	0.000187097	0.988638
00271461-ca96-4f0c-913b-35e0b1a11b5a	fishnet	remora	2.43328e-06	0.00140854	0.94018
00273fbd-0a1c-43a0-801f-104d80042fa0	fishnet	remora	1.33508e-06	0.000682029	0.976171
00275029-2125-4f6f-814e-d417c43308e4	fishnet	remora	1.05926e-06	0.000531761	0.970064
002814b0-a4f5-4b88-851e-7359a42fe48e	fishnet	remora	2.24467e-06	0.000647582	0.965521
0029b5b5-3658-4c61-9238-d8a11d8f1853	fishnet	remora	4.30739e-07	0.000160958	0.978657
002e9a89-e3dd-44bb-9cb3-db495a4c49f7	fishnet	remora	5.42305e-07	0.000270206	0.988629
002ed54f-a74a-459f-a7d7-7bc16a25de4b	fishnet	remora	7.39411e-07	0.00045973	0.965063
002f50d3-e0da-4a31-a3be-aa268f647b2a	fishnet	remora	6.37905e-07	0.000500857	0.979853
002f55ec-8e72-4066-afab-b3e44ed89eb8	fishnet	remora	7.8649e-07	0.000529408	0.977032
0030f4d6-99b2-4867-8b58-9ef10c588b52	fishnet	remora	4.01418e-07	0.000252926	0.980546
0031dffa-d125-4535-8fd4-a2225c00ade6	fishnet	remora	8.16125e-07	0.000546308	0.989777
0032c4b9-3d04-455c-bd77-fb77455ba906	fishnet	remora	1.6629e-06	0.000584082	0.959489
0033055b-cd33-4819-8afc-a9fdc0bd1ca3	fishnet	remora	8.02464e-07	0.000379651	0.982612
00340a36-bc73-4bc0-9c7f-379bf7f371d1	fishnet	remora	1.23864e-06	0.000293177	0.966087
0034d92f-c06b-4b03-90ae-6329b585df60	fishnet	remora	4.75814e-07	0.000320633	0.987696
0034e33e-1553-407f-9e23-d660983bb8e0	fishnet	remora	1.55665e-06	0.000801126	0.958164
003564f4-1347-40f9-8ff4-46b2b10ababb	fishnet	remora	4.97044e-07	0.000348292	0.980248
003586e4-4a6d-4553-8284-2b53918e718d	fishnet	remora	6.30146e-07	0.000284856	0.98007
0035a4df-d8e9-4f33-9635-f5adaed04f80	fishnet	remora	6.98055e-07	0.000409688	0.98177
0035b603-26d4-455a-8317-3fd57e324b9f	fishnet	remora	3.45162e-07	0.000223048	0.98972
0036cb94-4fa3-4a73-9f9b-3c1abaff7bcd	fishnet	remora	1.38219e-06	0.000814104	0.967995
003727c4-f1a2-4233-a646-b0047b94ec76	fishnet	remora	5.79157e-07	0.000526805	0.990889
00376cdf-f4a3-4cc1-a298-f9656a4c140a	fishnet	remora	1.15227e-06	0.00161498	0.973907
0037e252-5501-4998-be74-77a5ea5bee8f	fishnet	remora	5.11402e-07	0.00063405	0.974279
0037e757-a163-48c7-a6d7-1f9f2d54b3d4	fishnet	remora	8.30264e-07	0.000421819	0.973921
0037e818-d7d5-4cc5-a87b-e2fbf661ffd1	fishnet	remora	2.16638e-06	0.00123949	0.96276
0037f551-8d7a-4111-b573-0cb189e12d37	fishnet	remora	4.62826e-07	0.000304278	0.975823
003891b6-4c4f-4d7b-81a0-ad2ebdadadc5	fishnet	remora	2.69366e-07	0.000262904	0.984154
003a1e77-2fbb-4fb4-bea0-a9a58bb70d6e	fishnet	remora	1.7206e-07	0.000189495	0.98779
003a7793-c0c8-4633-a46b-98ad7c7fd1fd	fishnet	remora	2.2474e-07	0.000221749	0.988944
003b4606-f755-481c-87d0-41c3680901be	fishnet	remora	9.82595e-07	0.000568294	0.968367
003cc819-cb8f-4bd2-895b-a4c15e7787ef	fishnet	remora	8.1465e-07	0.000255456	0.980542
003d7781-64e0-4a40-8d1b-18d4eaec4e47	fishnet	remora	1.48062e-06	0.00093633	0.973981
003d7e6c-16c6-48c3-bc0b-d466440f9e25	fishnet	remora	8.54109e-07	0.000445824	0.983598
003dedd8-a679-43da-ab85-0c2d715bc248	fishnet	remora	5.97901e-07	0.000360787	0.987891
003f4dbe-6e99-4eb8-9048-435d6640353e	fishnet	remora	6.22848e-07	0.000675525	0.984905
003f88eb-4d32-4908-8168-029f239b3808	fishnet	remora	5.50112e-07	0.000339339	0.98008
003fc146-f436-4b4d-ad9f-d3941c83f298	fishnet	remora	6.3877e-07	0.000379041	0.979885
003fd7c5-b107-4e3b-84f5-33a25e2ed7d8	fishnet	remora	1.63721e-06	0.000515626	0.951265
00416e19-47a0-4d37-99c5-27f934b9f199	fishnet	remora	7.02395e-07	0.000232995	0.978338
00426a52-07db-4d28-831d-463e5ce40fc5	fishnet	remora	1.51779e-06	0.000559457	0.958925
004332e3-ca00-49dd-b3b9-1e31a2bdead1	fishnet	remora	8.44901e-07	0.000487209	0.966411
004504fc-56a1-4256-af4f-d578f4e8e1dc	fishnet	remora	5.82816e-07	0.000312157	0.975642
0046b964-2a95-4d14-a276-6a9898046a62	fishnet	remora	1.17549e-06	0.000490753	0.971958
0046c65b-04c0-4436-924e-af10da5aa6a0	fishnet	remora	1.85447e-07	0.000164954	0.993405
0046e140-aebd-40f7-a6f3-23813c37ab30	fishnet	remora	9.7744e-07	0.000611796	0.976793
004721e9-a663-4465-b8a8-7206c8110c24	fishnet	remora	8.20508e-07	0.000330053	0.978272
004738db-6a51-4134-934c-1a1e7297cdda	fishnet	remora	3.19687e-07	0.000298262	0.98027
0047b6c9-a932-4000-9bc9-6eef5a0d95e4	fishnet	remora	2.65688e-07	0.000444419	0.992361
0047dfa1-69f3-42f7-98a7-61ca5736367a	fishnet	remora	2.13094e-07	0.000255135	0.990556
00497e3e-4c27-4ffc-b19f-5fb0a58f8eb8	fishnet	remora	1.46837e-06	0.00423055	0.966522
004abc81-193f-44c2-be0e-37f0a647c7f7	fishnet	remora	1.46737e-06	0.000279312	0.953112
004b00f7-a436-4765-80ae-15f112b11d5d	fishnet	remora	1.58014e-07	0.000206554	0.993648
004b2eba-8e19-44a8-913b-c8205d15a3b0	fishnet	remora	2.50802e-07	0.000205776	0.9857
004b698b-2885-4574-afba-c4be59c63039	fishnet	remora	4.67952e-07	0.00030567	0.984557
004e5b82-9fa6-4030-b3e2-5b4817400a03	fishnet	remora	6.52309e-07	0.000296896	0.978587
004fa021-fa82-4063-b9cb-eb8224f7166f	fishnet	remora	6.69615e-07	0.000337988	0.986587
004fa254-1a0f-4313-b40a-8a19e7f14b90	fishnet	remora	2.37556e-07	0.000469412	0.995045
00507b55-5075-405b-9ff6-d153820df0f9	fishnet	remora	1.13315e-06	0.00054048	0.970324
0050f8de-979a-4f59-a87a-1f6ca8825b24	fishnet	remora	3.7439e-07	0.000244574	0.98833
00512b19-ec2a-4463-8a5e-70b225308af0	fishnet	remora	7.92635e-07	0.000609809	0.991419
005272cc-e3a8-4454-9eb1-b3df1fdddf53	fishnet	remora	8.85948e-07	0.000834589	0.979623
0052913a-df47-4783-aed0-526b8a98bc1a	fishnet	remora	8.34729e-07	0.000274946	0.982903
00534d88-82e8-4002-bf15-dd9a34625796	fishnet	remora	4.55056e-07	0.000176029	0.976285
0053d04f-2266-4809-bbe0-f6ce24e700ad	fishnet	remora	5.90332e-07	0.000190891	0.968209
0054590b-6998-44ba-90ee-62f440f4930a	fishnet	remora	3.53075e-07	0.000276823	0.981948
005540c4-2e5f-4892-a4b4-f4461cda9938	fishnet	remora	1.2907e-06	0.000586441	0.967946
0055ecae-dc2a-4d82-9c2c-eb870ba14edf	fishnet	remora	9.13255e-07	0.000424088	0.980082
00566b77-c774-4efc-abaa-ef89070459b6	fishnet	remora	7.64045e-07	0.000377175	0.981109
005678a3-cac0-499d-80ec-c927acddd86c	fishnet	remora	6.2193e-07	0.000287367	0.976158
0056a21f-f50b-453c-a7b7-fd8b9620fa93	fishnet	remora	7.48709e-07	0.000907868	0.982645
0056c13d-c9ec-4129-8004-3403fc27cd1a	fishnet	remora	1.3447e-06	0.000528453	0.97297
0056d863-1e8c-4193-ab8d-3f7fff220755	fishnet	remora	8.9513e-07	0.000731554	0.965206
00571181-d58f-46cc-907a-5eb85c06a792	fishnet	remora	3.42411e-07	0.00035551	0.984908
00577ee9-f973-480c-b067-35e4d30ff51a	fishnet	remora	3.21018e-07	0.000424178	0.989696
005a1d42-544f-413a-bd0c-8793ab1a9593	fishnet	remora	6.63838e-07	0.000267666	0.972118
005ba4de-c446-4096-9401-a110229a85a8	fishnet	remora	8.18607e-07	0.000666171	0.972381
005bd512-17b7-428b-bc4a-f33e823ebc05	fishnet	remora	3.6439e-07	0.000291779	0.986006
005bdbaa-db91-4d1d-a5de-0683648b1fcb	fishnet	remora	7.16099e-07	0.000493818	0.986397
005be4c2-4ac1-4f3b-9c2f-b6a16c2af5af	fishnet	remora	2.06657e-06	0.00102267	0.95148
005c2d83-c0da-417a-8281-d70a9507640e	fishnet	remora	3.91205e-07	0.000265484	0.982314
005c6877-8764-4fa7-b11b-5d93f63d2b53	fishnet	remora	4.41961e-07	0.000283289	0.9796
005d7665-923a-4916-b367-68c7de65b22c	fishnet	remora	3.58431e-06	0.00130876	0.947836
005e3f5d-b366-4ae6-978c-0a175021de15	fishnet	remora	5.74801e-07	0.000281786	0.973695
005f8230-e89a-40a4-b30a-4458442d33bc	fishnet	remora	6.14881e-07	0.000379888	0.984266
0060fa5e-70d3-4bea-8eec-a6cfc9933a59	fishnet	remora	1.39502e-06	0.000402723	0.953669
00635361-1ee7-4536-84ee-fc16d116cb09	fishnet	remora	1.06767e-06	0.000783468	0.983964
006500da-afa9-4bb8-bb9d-02e5e7658223	fishnet	remora	8.87674e-07	0.000401748	0.978396
0067229c-92b4-4dcc-b7e4-479597dc2582	fishnet	remora	4.05639e-07	0.000280943	0.982472
0067315d-583e-4329-ae64-03c0aec3031e	fishnet	remora	9.64094e-07	0.000392526	0.966859
0068272c-8ed7-45dd-91d7-08ea65b02012	fishnet	remora	2.75977e-07	0.000301848	0.987069
00683caf-9cc8-4e16-817a-8e81d358f29c	fishnet	remora	4.55036e-07	0.000469899	0.98874
00685cf5-4369-4dad-ba7d-50f6adb556e6	fishnet	remora	6.64712e-07	0.000547735	0.983554
00685e97-5570-4acd-b879-fbf3337ee857	fishnet	remora	5.04225e-07	0.00045127	0.975006
006adecb-9f7c-4726-bc38-c0426cb5cd45	fishnet	remora	4.89905e-07	0.000404554	0.993272
006b2866-49ec-4c96-bccc-23d9555e7e3b	fishnet	remora	6.01835e-07	0.000268557	0.971662
006b5e60-e6b5-4976-a0ee-e35953aac525	fishnet	remora	9.9523e-07	0.000332849	0.962111
006bbbe7-aa6c-49b3-b877-709c336eac26	fishnet	remora	1.71024e-06	0.000568884	0.967879
006d007f-9f76-4d44-ad43-923ed5b29137	fishnet	remora	1.743e-07	0.000215954	0.991105
00708f2f-5039-4d12-88db-fadadf15a472	fishnet	remora	4.74342e-07	0.000565565	0.987321
007149b7-f7a5-423a-bfa3-3d382ca8dc83	fishnet	remora	1.36512e-06	0.0013352	0.967988
00716e08-6702-4df5-8119-1318b7edbe3e	fishnet	remora	1.3794e-06	0.000760708	0.961521
00729a06-efb9-4c8e-a14d-449deb177428	fishnet	remora	9.86248e-07	0.000590458	0.987526
007317bf-75d4-49d9-bc25-4c9e442fe06a	fishnet	remora	6.90938e-07	0.000592916	0.972409
00735bc0-852c-4b74-aba3-0aa077e36027	fishnet	remora	6.34403e-07	0.000584683	0.987271
0073c544-5871-4a0e-b0eb-797d9c6a87f5	fishnet	remora	3.71731e-07	0.000811937	0.984721
0073c7d7-cfc8-490e-9247-c69919ec2dc2	fishnet	remora	6.1838e-07	0.000675254	0.973602
007461d1-03ee-407e-9c33-06f8e0760643	fishnet	remora	2.24063e-07	0.00033153	0.991323
00746618-eba1-425e-89b4-aeb3e47ac9e2	fishnet	remora	8.3825e-07	0.000459674	0.961987
0075a732-dd00-43ec-89ae-8f07e2a0b91d	fishnet	remora	4.0216e-07	0.0004469	0.978475
0075d06e-5e24-4494-80a7-f5a500422e3f	fishnet	remora	8.06542e-07	0.000442674	0.983514
00787f9c-f972-4125-b1bd-613ab94b864a	fishnet	remora	5.93493e-07	0.000333651	0.981698
007902e4-c5c5-4c09-b1a2-7a22adff440d	fishnet	remora	1.78717e-07	0.000222734	0.990889
007b4b72-0c1b-43d2-9d5f-e0bada67aad7	fishnet	remora	7.49794e-07	0.000291969	0.983513
007b8e8f-b21d-40f3-af26-969d6c3a4e12	fishnet	remora	6.20582e-07	0.000383683	0.985788
007ba8c7-382f-4b53-8f79-c61dd72b5a11	fishnet	remora	1.16237e-07	0.000267198	0.99773
007bd957-d9ee-46ae-a615-cb8a5416e8d4	fishnet	remora	4.51555e-07	0.000324007	0.983382
007d33d4-924c-499e-a40c-502302bd8c60	fishnet	remora	1.11303e-06	0.000604469	0.978417
007d7b27-8dab-4030-93d7-2be87c26432b	fishnet	remora	3.50843e-07	0.000426754	0.988548
007d998b-6bef-4a4f-99cc-1f065134aeda	fishnet	remora	6.35672e-07	0.000251678	0.97488
007da452-9a5a-43c1-8abf-fcecbf749264	fishnet	remora	1.11259e-06	0.000599493	0.97553
007e0b95-c938-4a1e-b37a-7a1312dfdd9a	fishnet	remora	4.82224e-07	0.000176197	0.979292
007e3bb1-11b2-4445-af11-ccb3c0db3063	fishnet	remora	8.69913e-07	0.000565303	0.970349
007e9c84-b88e-4a05-82b1-bbf9348cc69f	fishnet	remora	4.62516e-07	0.000302286	0.979068
007eaf7e-62ef-437f-bde5-ac058e411a66	fishnet	remora	1.09569e-06	0.000580405	0.981139
007f5b4d-6ebe-4f25-afbb-0fcd03b7cc82	fishnet	remora	6.60639e-07	0.00167214	0.979036
007f7e24-bc50-495e-b785-a3470786250a	fishnet	remora	2.02507e-07	0.000219701	0.994819
007fb0a1-f862-4d4c-88b7-7442afce0bff	fishnet	remora	9.54621e-07	0.000762536	0.968871
008012f5-0686-425a-9e78-bdf913441dd8	fishnet	remora	8.0004e-07	0.000309527	0.981149
008158a9-8381-4f64-b5ab-59720695ac89	fishnet	remora	4.60522e-07	0.000260053	0.984582
0081efc6-5688-4c16-8e25-9d91f31b2b9c	fishnet	remora	2.76238e-07	0.000213984	0.98531
00821080-d1d8-4a6a-9496-1ce2b421ac80	fishnet	remora	7.56586e-07	0.000287356	0.972969
0082eb32-6931-467c-810a-81227ea554b3	fishnet	remora	2.86874e-07	0.000285825	0.989754
00830220-1ed7-48b0-abf1-ed640bc7d2b6	fishnet	remora	7.54095e-07	0.000404125	0.965272
00830e11-77bb-47d5-9e77-dc7f8fd8a9fb	fishnet	remora	4.95595e-07	0.000357292	0.984451
00836a51-2b10-4a97-9365-4c51f5fbe168	fishnet	remora	6.87121e-07	0.000332985	0.976591
008475f2-3eae-4a6a-8de9-71c14023a45e	fishnet	remora	7.11377e-07	0.000390166	0.965223
0085a970-4a75-4a19-b1aa-af980a293dfa	fishnet	remora	1.16438e-06	0.000669048	0.973326
0085c1ec-3332-4e23-85da-7c911455f307	fishnet	remora	6.14378e-07	0.000262228	0.974441
00877c34-0f93-437c-82e8-e0f595783191	fishnet	remora	1.137e-06	0.000949586	0.962835
008935cc-a92e-4aef-bd72-aa49e2ad4a63	fishnet	remora	1.23028e-06	0.00072273	0.972136
0089ad48-b7f3-4980-a11c-57982eab6961	fishnet	remora	9.83052e-07	0.00055596	0.981812
008a5f0a-2865-4687-8b24-c678caf2c99b	fishnet	remora	1.97785e-07	0.000245868	0.991515
008b7f75-e603-4181-9d2d-0d9fee1a33ae	fishnet	remora	8.82544e-07	0.00043225	0.991687
008b86f4-93e2-46e9-954e-2ea8e89c2f2c	fishnet	remora	2.73309e-06	0.000481353	0.918376
008be6ff-d40e-4f7e-962c-18ae39ac1637	fishnet	remora	6.28109e-07	0.000839391	0.984555
008c7acd-c5f9-44b6-92c6-04972006b5c4	fishnet	remora	1.089e-06	0.00030385	0.955903
008faae4-6612-48c7-bc71-b65115896ad1	fishnet	remora	1.6809e-06	0.00434231	0.956412
009006b3-0588-40fe-a1b4-acca3b2baaa3	fishnet	remora	7.49284e-07	0.000389826	0.972239
00902ea5-d168-4785-a9a4-ded62bf560db	fishnet	remora	7.57777e-07	0.000363713	0.976551
0090bb01-e2fe-4eac-aaad-8b3a04e61b36	fishnet	remora	6.43689e-07	0.000328371	0.976404
0090dd49-e671-47dd-93da-e30168a1ea8c	fishnet	remora	7.01262e-07	0.000502757	0.981909
00927ef3-93da-43b5-86e1-b1c95238c2a4	fishnet	remora	5.80969e-07	0.000409101	0.973881
00937599-d8a4-43d3-bff9-8def5d7b19ff	fishnet	remora	1.29155e-07	0.000250683	0.995653
00944c23-022a-4086-a6fa-73ddef3bc4d8	fishnet	remora	6.65617e-07	0.00028874	0.97544
00946a26-4468-4303-8e45-9a39fbf4e04f	fishnet	remora	6.85796e-07	0.000308572	0.982823
0094d1a6-180a-4f8a-9676-f8cbd5c91f05	fishnet	remora	5.28635e-07	0.000392046	0.979684
00955389-104d-4175-b82d-7c80407424b1	fishnet	remora	8.64617e-07	0.00054187	0.983282
00958d38-79c5-4c44-b02f-a35363dcad83	fishnet	remora	7.60325e-07	0.000509383	0.966895
009694fd-8db0-4ab4-a5bf-7ef2b5a879cb	fishnet	remora	5.57656e-07	0.000366013	0.976527
00970670-4331-4d36-a979-3b70901b428a	fishnet	remora	1.02786e-06	0.000435143	0.981606
00980636-abcd-46e8-81a1-8cabd48d1b82	fishnet	remora	4.27374e-07	0.000389802	0.98151
00985ece-8807-4132-9eb3-bea1369c60ae	fishnet	remora	1.52987e-06	0.00190225	0.964243
009878b4-f3f0-490a-9e2d-a16bd251fb1e	fishnet	remora	8.5997e-07	0.000392457	0.982569
0098963a-276b-4840-980a-6df4ee6b50ab	fishnet	remora	1.1218e-06	0.000384615	0.974239
00996858-2975-4b05-b920-f9b1ff7a4921	fishnet	remora	4.92535e-07	0.00031249	0.982921
009970de-418f-43ec-957a-a2f521328cf3	fishnet	remora	5.39507e-07	0.000221779	0.973985
0099b910-315a-46a3-acd7-9fcfb4f546b5	fishnet	remora	8.57002e-07	0.000402269	0.983454
009a2402-d7c0-4fb4-8e50-b3873da76799	fishnet	remora	3.63752e-07	0.000637915	0.988623
009a4116-43b9-46af-af88-35f5f32d9671	fishnet	remora	1.05888e-06	0.00303858	0.989973
009a7675-714a-486a-a246-1ba5caa77db1	fishnet	remora	3.62841e-07	0.00022453	0.989168
009ad0d0-09c1-4a65-9124-e174a8e42e24	fishnet	remora	4.43455e-06	0.00081415	0.943925
009c4956-e35a-4d88-ac92-0a4ae4813365	fishnet	remora	3.72586e-07	0.000208447	0.986632
009cb712-3039-4aea-93a7-13a1bc5958cf	fishnet	remora	1.26909e-06	0.000572781	0.962037
009e9e4a-208a-431a-8ec5-c30216a9a010	fishnet	remora	7.99472e-07	0.000273863	0.969132
009f3b62-1e6b-4e00-a595-b4a5e9372006	fishnet	remora	9.38169e-07	0.000606548	0.972113
009ff10c-e97d-488d-b0c1-3184cdda26d6	fishnet	remora	6.14677e-07	0.000266404	0.973426
00a00deb-f756-4603-9883-13be5b6dd904	fishnet	remora	2.14333e-07	0.000234567	0.989891
00a01bb5-9f88-4a0f-90c9-4649360f41f6	fishnet	remora	8.2869e-07	0.000506516	0.981957
00a1032b-0dde-4f39-bbeb-41dc5f0e3951	fishnet	remora	1.20533e-06	0.000412685	0.961813
00a112a0-93bd-43c2-8437-ad2c05c5ec5d	fishnet	remora	4.73686e-07	0.000485755	0.988317
00a1575e-5641-4960-bd62-b0c01a2dc4b2	fishnet	remora	4.81788e-07	0.000322423	0.975798
00a175ff-51ea-418d-831c-c7c2ccb90e18	fishnet	remora	2.31412e-07	0.000210062	0.98991
00a191c9-b1d6-480d-b4f4-8deb7f77c728	fishnet	remora	2.91464e-06	0.00124784	0.978303
00a1998c-2992-4ad2-b98a-5fc1e93298fe	fishnet	remora	1.16266e-06	0.000301053	0.953915
00a1f340-d030-4cda-b1af-9544bf543fb4	fishnet	remora	3.11095e-07	0.000297089	0.988855
00a210c2-3969-4140-a53e-3483f19ce035	fishnet	remora	2.87066e-07	0.000176114	0.992096
00a25de4-1565-4571-acd9-822cce06070d	fishnet	remora	5.91955e-07	0.00023245	0.978273
00a2860f-9765-4ac0-8a26-853b09f9b437	fishnet	remora	2.37477e-07	0.000203485	0.992186
00a3b128-a19d-43ea-908d-b54e868f6f91	fishnet	remora	7.705e-07	0.000282749	0.978551
00a4439a-2ade-41a6-ab6c-345980249202	fishnet	remora	1.07915e-06	0.000548202	0.970562
00a84834-7f4d-4d67-82f9-16bbd84a1d01	fishnet	remora	1.1537e-06	0.000332129	0.952973
00a84a3c-ad78-4d7e-8f6f-9d7440aa7904	fishnet	remora	7.55643e-07	0.000300132	0.972747
00a9cc2c-0ebd-4d6e-8170-f3728cdee9f2	fishnet	remora	1.97576e-06	0.000517856	0.961631
00aa6508-0954-4201-8ea2-0295529f2e86	fishnet	remora	1.08458e-06	0.000641811	0.968153
00aa903f-5abc-4d1b-a168-ef91b32a80fe	fishnet	remora	2.41572e-07	0.000183642	0.988155
00aa963e-53c7-4b79-b13e-a735b14c1719	fishnet	remora	2.87049e-07	0.00016779	0.987981
00aab6fb-4ffa-4d69-a3e9-4a2812a6ca22	fishnet	remora	8.78081e-07	0.000515345	0.966489
00aae0fc-bf0d-437b-bd13-1283abfbb9bb	fishnet	remora	5.56707e-07	0.000304772	0.9789
00ac0be1-dfd6-4d13-9ce8-6ef0a9a46c54	fishnet	remora	9.8382e-07	0.000602907	0.96075
00ac2904-92a8-4299-ab97-ea066420c975	fishnet	remora	1.34217e-06	0.000642596	0.968918
00ac3538-ae91-4348-8fb9-48b490bd323f	fishnet	remora	1.10552e-06	0.000284765	0.959338
00ac7464-5c34-4cb1-bb2c-4d70e6bb60c4	fishnet	remora	1.13013e-06	0.000538298	0.96513
00adde2e-de55-46e2-add0-b5279cd17c3b	fishnet	remora	1.82996e-06	0.000540806	0.971591
00adf2a3-a8de-471c-b3a0-670a72c0ae78	fishnet	remora	4.92557e-07	0.000288474	0.977305
00aeaba5-c231-4eea-b59c-67bd8c1bc16c	fishnet	remora	1.12815e-06	0.000306166	0.948564
00aec44e-9dea-4cab-aaf7-b9511f3106b7	fishnet	remora	7.87791e-07	0.000407406	0.981328
00aed194-778d-4235-a666-d6e854ae1ec7	fishnet	remora	7.7109e-07	0.000672592	0.982196
00b0ca53-0345-4be1-9e0d-7f7cb5eea192	fishnet	remora	3.7116e-06	0.00120176	0.935091
00b1711b-5c61-4444-889a-6a61ce50b55c	fishnet	remora	7.15346e-07	0.000618238	0.976184
00b210b8-ff80-4e22-9d6c-5d0270c5140f	fishnet	remora	1.38131e-06	0.000335614	0.952762
00b24f39-148c-441d-94dd-f0b26256fcca	fishnet	remora	1.88895e-06	0.00537957	0.96303
00b27e02-b903-4479-a59f-6f85a9f9e563	fishnet	remora	2.53829e-07	0.000133459	0.990847
00b37dc2-f000-4cd3-8b54-5c35eb71d322	fishnet	remora	8.81585e-07	0.000333149	0.979877
00b3904c-ffc0-4d6b-9296-cb24456a8554	fishnet	remora	3.30543e-07	0.000285501	0.983535
00b42d77-ba0e-49d0-9337-acec26649fc9	fishnet	remora	7.49931e-07	0.000447534	0.970007
00b4825d-566d-427b-8e69-23a9f08b3fa8	fishnet	remora	8.03918e-07	0.000295304	0.973893
00b49569-7b0b-4dfa-90d3-647c1bf25ea4	fishnet	remora	3.00319e-07	0.000147128	0.993705
00b49a77-e1e6-4707-bdf5-27310d86f743	fishnet	remora	8.73525e-07	0.000358913	0.980079
00b5cd3d-fbd2-4494-995f-b7eb8d246af2	fishnet	remora	4.65089e-07	0.000349654	0.980878
00b60f6a-9331-4a8c-9e32-f22c5d923d38	fishnet	remora	8.07715e-07	0.000259833	0.964086
00b69170-c10a-4d5d-81d5-89084837046a	fishnet	remora	5.63988e-07	0.000703646	0.992129
00b6abf2-53d5-4d9a-9ad0-9d745618fcbc	fishnet	remora	2.05656e-06	0.00127771	0.961152
00b744a0-3397-486a-b6a4-0b605a38041f	fishnet	remora	2.50742e-07	0.000216974	0.989744
00b74d14-92bd-4ba3-a54b-0472f7aacd4a	fishnet	remora	7.31952e-07	0.000526521	0.982379
00b8dc06-953f-454c-bf32-75fd62f5648f	fishnet	remora	1.03437e-06	0.000245726	0.951905
00bb69c6-78bc-410c-acbf-d64374056067	fishnet	remora	8.34432e-07	0.000566239	0.98935
00bb6cdd-d4f6-45c0-b271-91b4ca94ad7f	fishnet	remora	5.01952e-07	0.000872301	0.976326
00bba5fe-340d-40f5-9d28-77a31d982171	fishnet	remora	8.9593e-07	0.000872557	0.97761
00bc9e95-60b8-4ab6-afa2-d7f52e8b5d5c	fishnet	remora	1.58138e-06	0.000423711	0.945589
00bcf82c-6d7e-45dc-b6d7-186c543306a0	fishnet	remora	1.19008e-07	0.000163813	0.99285
00bd115b-0fa4-4a27-9a86-32f8ec2cd20d	fishnet	remora	8.9006e-07	0.000565732	0.984427
00bffd12-e186-4fd0-ac13-6b9ebf96443d	fishnet	remora	3.34732e-07	0.000275209	0.993963
00c04cbb-b5a8-4e44-a601-f71b4d05e647	fishnet	remora	3.09724e-06	0.00118681	0.938621
00c1473a-756a-4f8c-8cff-daf14a0a4d57	fishnet	remora	5.25704e-07	0.000491601	0.989947
00c41385-8b02-4a2c-82ff-d5080436ad58	fishnet	remora	2.99141e-07	0.000332719	0.987257
00c4c027-b4d1-4d64-9055-6281db68d810	fishnet	remora	6.90183e-07	0.000389362	0.972439
00c5976e-41a9-45c2-b004-a768bda47143	fishnet	remora	8.52247e-07	0.000338122	0.961474
00c59e85-c64b-4895-ba8d-16f3a8da7006	fishnet	remora	6.5907e-07	0.000258369	0.978602
00c7aa2f-b319-46db-ba51-66b708003b12	fishnet	remora	1.13005e-06	0.000318101	0.970497
00c87b9e-e46a-417e-8f7f-05369237802f	fishnet	remora	1.25051e-06	0.000466044	0.965604
00cb5a16-b7dc-4ba6-bd53-5e84e8d1ca7f	fishnet	remora	7.05301e-07	0.0002936	0.974923
00cc28b6-702a-4488-87f3-a6a480ab82d8	fishnet	remora	1.17553e-06	0.000358122	0.97207
00cd76cd-e007-429c-87c9-ee3700295d29	fishnet	remora	6.22336e-07	0.000193316	0.965306
00cde7f0-6a12-4d4a-9939-4dec7951d6cd	fishnet	remora	6.21406e-07	0.000533711	0.97201
00ce2271-4850-467b-ba88-914dc1d0efb0	fishnet	remora	3.61111e-07	0.000299067	0.982607
00ce402b-a9d9-40c6-b3bd-1ede4b390f7b	fishnet	remora	6.25264e-07	0.000363268	0.970993
00ce5f1b-0ae3-4471-a0bb-e23d66838052	fishnet	remora	1.96697e-06	0.000420325	0.95076
00cf1bf2-21a6-400b-8d11-e431d7d5ee70	fishnet	remora	1.26924e-06	0.000476872	0.973791
00cf348e-2c9f-4315-8cb3-8ca9e76a0226	fishnet	remora	8.78456e-07	0.000430834	0.98333
00d06e59-ef39-45c6-b43a-7f89a3cd65ea	fishnet	remora	1.22533e-06	0.00093126	0.984278
00d09262-74cc-429c-b87e-d877bcab07f1	fishnet	remora	1.01373e-06	0.000519712	0.976274
00d09dc2-6bb8-4270-b10f-a7fd21fcb042	fishnet	remora	6.07996e-07	0.000336987	0.970571
00d0c76f-d8f8-4d4d-94ac-4e056a2c76b0	fishnet	remora	1.44058e-06	0.000949741	0.982044
00d15057-3a02-4e1f-b705-1da30b68251b	fishnet	remora	8.60742e-07	0.000534488	0.969932
00d1e36d-71ab-4661-a8b4-911a2b0119ce	fishnet	remora	1.5192e-06	0.000620179	0.969672
00d49a6d-e3fb-4463-a97d-787832f55da2	fishnet	remora	3.17302e-07	0.000532795	0.986492
00d4ab73-cf96-46e7-bf01-e50dc5d6d0e7	fishnet	remora	2.06448e-07	0.000274951	0.992
00d51513-3e69-4399-a11f-acce3e673ee7	fishnet	remora	9.36134e-07	0.000834649	0.971897
00d5e135-65b6-4cb3-b487-1631cebade5d	fishnet	remora	8.90512e-07	0.000452326	0.977363
00d63f1e-d501-4b43-a70d-0e5c91e8350d	fishnet	remora	7.46402e-07	0.000328828	0.977588
00d78aa7-8e44-4f4d-88f9-23bfcc00f651	fishnet	remora	4.94589e-07	0.000282233	0.982335
00d79add-5044-4686-b196-ff74474d14bd	fishnet	remora	1.35791e-07	0.000120908	0.994194
00d7ac88-5ecd-48fd-88c9-c3a168425756	fishnet	remora	3.5497e-07	0.000421189	0.990366
00d7cc3b-3054-4d64-9de3-018539b8c4fa	fishnet	remora	4.68059e-07	0.000326761	0.985701
00d9169a-97cd-4821-adba-bb3de697c4cd	fishnet	remora	3.93728e-07	0.000569899	0.99307
00d9cb9b-df8a-43e3-9754-d1057d7427d3	fishnet	remora	5.48217e-07	0.000369058	0.985756
00d9e29b-2c05-4df1-a3a6-404f6a396974	fishnet	remora	1.46881e-06	0.00110856	0.968405
00da1df5-8099-422d-b046-f75378a3b167	fishnet	remora	1.65638e-07	0.00029994	0.991316
00db005b-5446-457c-947b-45c50562806e	fishnet	remora	9.28014e-07	0.000416698	0.968751
00db7f40-e583-424f-b63c-100973e460a4	fishnet	remora	3.43828e-07	0.000177665	0.985977
00dba546-014f-4e62-90cd-5562d45dcc72	fishnet	remora	9.00068e-07	0.000736603	0.978723
00dbf6db-123b-4b58-9d06-98cd84386eb0	fishnet	remora	6.19097e-07	0.000300707	0.984039
00dd5e55-0ba1-4360-b3c6-5240415081b1	fishnet	remora	1.51478e-06	0.000560556	0.972303
00deaa93-3efa-46e4-8a6b-8a66cbc3c21d	fishnet	remora	1.7571e-06	0.000491836	0.965114
00df4dc9-dccb-4a94-aa00-a4099d9d5631	fishnet	remora	1.60547e-06	0.00100951	0.962607
00df8779-ecff-4cd4-b5de-a9fcff899b45	fishnet	remora	5.00916e-07	0.00033361	0.987174
00e0be27-d991-40a1-9f9c-5bd8175aec62	fishnet	remora	5.76434e-07	0.000478054	0.979174
00e24500-2e11-49ab-bc2d-520973b180ea	fishnet	remora	8.26147e-07	0.00123486	0.973242
00e297a7-68d4-4a4b-b518-81c5c931468f	fishnet	remora	6.39367e-07	0.000398175	0.980126
00e3abe2-a2f1-4175-a703-cfbcdfdccde7	fishnet	remora	9.44186e-07	0.00054677	0.967177
00e4787e-4c11-43e3-8b7a-ea21033196c6	fishnet	remora	8.55598e-07	0.000293698	0.968315
00e4a6c9-ca7d-4231-86dc-87e19c7b9c8d	fishnet	remora	1.51304e-06	0.000562919	0.963947
00e4fc5d-028e-4f4b-9b26-76e21adb26ff	fishnet	remora	1.43077e-07	0.000187744	0.993765
00e5be1d-9abd-4432-938c-4660177e3cab	fishnet	remora	3.02673e-07	0.000213981	0.985229
00e670cb-216d-495f-bc06-ff8095c90210	fishnet	remora	1.08759e-06	0.000954818	0.970323
00e778fd-cf5c-4fbd-9a41-09fbea266a71	fishnet	remora	6.69938e-07	0.000310382	0.968223
00e7c209-2501-4430-82f3-f190eb1ebd3b	fishnet	remora	6.38798e-07	0.000467921	0.97609
00e7c555-bf3f-403d-a7b3-58bdcb7c5945	fishnet	remora	1.40557e-07	0.000195235	0.994631
00e86cb7-d33e-43c7-a6d6-d1370d4f112f	fishnet	remora	6.70451e-07	0.000379843	0.984053
00e8905d-634d-45ca-a021-9eefb16b3574	fishnet	remora	3.76211e-06	0.00128404	0.943338
00e8f5ec-a9c1-4594-af32-3ced6d9b69fd	fishnet	remora	9.71877e-07	0.000675605	0.980646
00e9004a-5c0d-4815-b691-ef0980b92510	fishnet	remora	1.09757e-06	0.000921476	0.962924
00e99b9e-6f34-4f72-bc86-5b3c5f1561f8	fishnet	remora	1.3042e-06	0.000680371	0.957761
00e9c9d3-4393-43d7-9463-dd95feccecfa	fishnet	remora	9.59798e-07	0.000386411	0.96913
00e9dd27-627d-4671-b170-6bec2ad99a1c	fishnet	remora	7.78374e-07	0.00208826	0.98669
00ec1e90-eccd-4a7e-931a-61aeb50b93f1	fishnet	remora	1.44639e-06	0.000426472	0.960573
00eca475-94d5-448b-b101-c2cd78ec15c3	fishnet	remora	2.01394e-06	0.00107411	0.977378
00ecb814-7c83-454b-9651-3545f78d881f	fishnet	remora	7.98551e-07	0.000375359	0.978635
00ed8e91-55a0-4b6a-8cb7-1cc0b4de2c78	fishnet	remora	1.19182e-06	0.000458311	0.957371
00ee4f90-b139-4309-8c8e-97509c00ff4a	fishnet	remora	8.6019e-07	0.000826282	0.98736
00ee7ae4-49f3-4fe3-8475-db049f203d0d	fishnet	remora	5.97405e-07	0.000424279	0.98417
00eee3f8-67c2-4a9b-82d0-1b11c8605c31	fishnet	remora	5.80047e-07	0.000368257	0.978944
00eee712-41a2-46dc-a4b4-e9cd080c75c0	fishnet	remora	2.53236e-06	0.00057643	0.951483
00ef2d8e-6900-4424-889f-f74607a807d4	fishnet	remora	5.54788e-07	0.00026137	0.981737
00ef36f3-6a51-44b6-8e91-3511d7a7dadb	fishnet	remora	1.10397e-06	0.000527336	0.9731
00ef5283-8159-4cbb-97fc-5618035f3587	fishnet	remora	1.12504e-06	0.000578302	0.969349
00f025b2-9746-4082-9509-80e5273e657b	fishnet	remora	9.35578e-07	0.000456324	0.978901
00f06621-c1ef-407d-8a8a-0731fbe424ff	fishnet	remora	2.78902e-06	0.00104577	0.954598
00f06bf5-bd81-46e7-9043-2cdf378964e2	fishnet	remora	8.84931e-07	0.000241701	0.977698
00f0c9f6-d773-4f12-b624-20d7da5ee462	fishnet	remora	7.0278e-07	0.000272589	0.977667
00f0e2d6-71a0-4239-b1d1-294e7bf4e54f	fishnet	remora	7.90392e-07	0.000442196	0.964808
00f10c18-5f5a-4650-8ad8-65e639ec6cc9	fishnet	remora	1.55548e-06	0.00079103	0.976094
00f121de-0280-47cc-8eb2-078b80e5726f	fishnet	remora	5.67529e-07	0.000489589	0.974593
00f13039-315f-460d-ba3b-e65818c9a1de	fishnet	remora	5.00351e-07	0.000237165	0.980466
00f19e4f-dcfe-453a-9939-a3277577165c	fishnet	remora	7.45159e-07	0.000430441	0.976381
00f25cdd-15f4-45a4-90cd-ec0f7c0498a1	fishnet	remora	9.53539e-07	0.000682092	0.980883
00f46b4c-90b2-45c8-8852-e4af4ed114c2	fishnet	remora	5.45868e-07	0.000232988	0.974598
00f5e456-ba1c-42ab-ba53-e25fb3352dc3	fishnet	remora	4.3871e-07	0.0003948	0.985245
00f662a6-92df-4470-9d92-352bab76755d	fishnet	remora	4.50567e-07	0.000254403	0.982766
00f71f5a-9f65-420e-948c-e2037245f61d	fishnet	remora	3.69182e-07	0.000343468	0.982913
00f7c751-f3dd-49da-9e93-6eca3c109ca2	fishnet	remora	6.72639e-07	0.000391411	0.9852
00f7f7cf-fdad-4fdc-b55e-296265288f34	fishnet	remora	3.98646e-07	0.000363299	0.978023
00f84b9b-9544-43b7-86e8-641ea2fbc092	fishnet	remora	3.00809e-07	0.000254673	0.987039
00f9b3de-0d5b-47df-9a94-07c5c8e93d82	fishnet	remora	4.52157e-07	0.000788521	0.98684
00fa672b-dc17-4895-9585-d47c9afee4d7	fishnet	remora	1.20149e-06	0.000940034	0.978114
00fb6dae-2070-45db-aadc-a8937af30bee	fishnet	remora	3.42891e-07	0.000312054	0.991974
00fb9adc-a111-4505-8e1c-1a386ffd9837	fishnet	remora	8.45139e-07	0.000620212	0.983672
00fc0499-f17a-454d-b9c6-94169f0552d4	fishnet	remora	6.25458e-07	0.000318213	0.97835
00fc4c1b-816f-4a61-8077-4eadb8598f72	fishnet	remora	2.17421e-06	0.000576929	0.967557
00fc5d0e-a28a-400b-a195-ec0bd38da0ef	fishnet	remora	4.9489e-07	0.000166853	0.979777
00fc6179-cb81-4ffc-b093-2363ed077e79	fishnet	remora	5.46093e-07	0.000255995	0.967765
00fc903c-c3c8-4f8e-88e3-299e58e71711	fishnet	remora	1.11808e-07	0.000144067	0.996251
00fc9484-d878-4cc2-ad0a-798555d57783	fishnet	remora	1.57973e-05	0.00156986	0.984906
00fed709-d685-4558-894d-21904bef7e8d	fishnet	remora	6.51379e-07	0.000429809	0.979479
00ff005d-1042-4f0c-9709-4f00c13e9d94	fishnet	remora	4.28148e-07	0.000350516	0.985212
00ff173a-f2ae-43bb-ad6a-084246378aba	fishnet	remora	7.56261e-07	0.000732504	0.989501
00ff4fcb-499e-4dbd-b587-1996168ddc9b	fishnet	remora	6.30123e-07	0.000313641	0.973907
00fffd1d-a069-4abd-8a82-aa741e2276f9	fishnet	remora	7.99113e-07	0.000992521	0.970667
0101459e-cbbb-4828-b82a-d93b91a5b856	fishnet	remora	1.22234e-06	0.000721037	0.979964
0101c320-f735-40d3-aecc-b6919ea778f3	fishnet	remora	5.85521e-07	0.000483444	0.983478
0101d8ae-da36-4a96-b147-b3de3968b76d	fishnet	remora	1.31976e-06	0.000415746	0.960613
01023fb5-5717-4d7e-b4ee-0d47e773457c	fishnet	remora	5.93961e-07	0.000236726	0.9793
01039747-ec3e-4b59-ad1f-3bc0810e19d6	fishnet	remora	5.30134e-07	0.00105182	0.986608
010467a8-7fa2-4ed7-9ae9-4ec2c1ac0b74	fishnet	remora	5.29218e-07	0.000314099	0.98213
0104b774-1037-43df-8e71-6c7ac7ce2840	fishnet	remora	8.08126e-07	0.00041264	0.971249
0104fd38-7208-4bbb-a334-c47b3cf7d727	fishnet	remora	8.0882e-07	0.000880259	0.980246
0105d92c-e23c-4a4e-a82e-4a9e3f418854	fishnet	remora	2.41966e-07	0.000162771	0.987092
0105e6f4-ed54-4128-9fc8-c703ac7eced9	fishnet	remora	8.30988e-07	0.000393403	0.964752
0106041a-21fc-4152-9ef8-1546049a5093	fishnet	remora	1.4608e-06	0.000399634	0.96589
01069b93-2600-4135-92a3-12a304f982b8	fishnet	remora	8.31405e-07	0.00251942	0.977308
0106c772-38e8-43ad-97d8-54ee3131decb	fishnet	remora	6.79462e-07	0.000230313	0.967026
0106cbec-ecd1-46b7-83be-103411b9daf5	fishnet	remora	3.81087e-07	0.000397559	0.98207
0106cce6-7bd2-4f76-a94a-cf0577f32727	fishnet	remora	6.57658e-07	0.000414846	0.971545
01072eb8-73d4-43cb-aa52-5e073f6db4db	fishnet	remora	3.6242e-07	0.000223073	0.981288
0107692d-5b89-4fd2-9ee1-717eb6cce686	fishnet	remora	1.97365e-07	0.000198282	0.989241
0107aad1-4b04-4d23-8400-9c6315a20b3d	fishnet	remora	3.13898e-07	0.000193494	0.983657
0108746d-f41c-4185-b46f-9c6da50dace7	fishnet	remora	1.29332e-06	0.00074416	0.972772
0108f22b-bfb7-432e-9507-cad7ad0ccb61	fishnet	remora	2.1061e-06	0.00103457	0.963312
01097bb1-08cb-4f69-9458-61deaa8fca4b	fishnet	remora	2.19896e-07	0.000262726	0.991733
010bff86-8df0-48fa-8726-63d9c36f1be3	fishnet	remora	5.5533e-07	0.000478037	0.975212
010d7e44-4d7f-46c9-98a6-da698199e9e9	fishnet	remora	3.92009e-07	0.000183311	0.976462
010df94e-8725-4097-917d-3dc455d6550c	fishnet	remora	5.77936e-07	0.000183808	0.970645
01123ad8-f049-4000-85ee-a7669783b70a	fishnet	remora	8.61424e-07	0.000263905	0.978026
01124b97-163c-45cf-bb42-f2531557cb26	fishnet	remora	5.77155e-07	0.000302666	0.974643
0112970e-8ad9-4979-b2cd-e66e1defc4bb	fishnet	remora	3.32788e-07	0.000322488	0.994052
011393f8-cdfd-4cb2-86af-c64016686361	fishnet	remora	1.79177e-06	0.000622756	0.955814
0114091f-33a9-4c95-88d5-2f805dbf229c	fishnet	remora	5.04779e-07	0.000247304	0.976061
01146423-2c50-4e79-ac99-60f9d287db72	fishnet	remora	1.08676e-06	0.000474147	0.974269
0115fa5c-dbc2-4465-830c-9a60177d6897	fishnet	remora	1.24299e-06	0.000447531	0.967908
01162a29-fb9d-4537-8c36-f0a8ea8e41df	fishnet	remora	1.28239e-06	0.00116877	0.974985
011724ec-400f-40af-b2e2-22c593c03da9	fishnet	remora	1.26516e-06	0.000817731	0.974319
011770c7-c6b0-4f6e-be90-dddaa30de83e	fishnet	remora	3.52321e-07	0.000351702	0.987109
0117d8a0-5a2f-4bcb-ad70-a538311610d8	fishnet	remora	1.08799e-06	0.000479101	0.971143
01183488-c564-4c1d-9ebf-65ea920e2f44	fishnet	remora	9.31097e-07	0.000422454	0.982437
01183e83-07aa-4a14-93dd-7e971b952709	fishnet	remora	1.33449e-06	0.000547513	0.972281
01186115-9046-428a-a853-ba4fba414489	fishnet	remora	3.30726e-07	0.00116803	0.990382
0118faf4-3417-406c-a2ea-ba4f29aa189d	fishnet	remora	6.88075e-07	0.000340214	0.982854
01190b91-6ce4-4b63-8f6f-f0f34ba652a8	fishnet	remora	7.33117e-07	0.000838628	0.972826
011b372d-73ab-46d6-ba58-d956a2b581f4	fishnet	remora	6.11109e-07	0.000362332	0.981581
011bf0cd-8abd-4fd7-96ab-a60a813d8ed7	fishnet	remora	1.95996e-06	0.000720188	0.963235
011bfe68-3105-480e-8bc7-8d1045c106d1	fishnet	remora	2.03711e-07	0.000231411	0.988214
011e2ffa-9b0c-4215-a2cc-475cfcb37cb2	fishnet	remora	1.13121e-06	0.00052491	0.959601
011e886d-fd9c-4013-8a72-0e74f6aca983	fishnet	remora	4.60028e-07	0.000433008	0.981093
011ec380-7070-4073-877e-5470749013f0	fishnet	remora	2.1824e-07	0.00070943	0.990879
011ecff6-f60f-4de9-b281-3f0bedd0ff14	fishnet	remora	6.00749e-07	0.000319155	0.986879
011f6c29-7e7a-4efa-a958-e8168f424ec5	fishnet	remora	5.86835e-07	0.000260507	0.970823
011f806b-81fc-4f76-9e79-95540f040377	fishnet	remora	5.70694e-07	0.000945147	0.970453
0120000e-79df-466b-b81d-225d368af42a	fishnet	remora	1.59373e-06	0.000429019	0.959077
0120a084-ef48-465c-bd72-8aab81c83163	fishnet	remora	3.92842e-07	0.000530057	0.98585
01218a39-bf4f-468b-a59d-09b369b5c456	fishnet	remora	1.70072e-06	0.000536516	0.95626
0121e2e0-7769-45e7-bfa3-9cd5abd326ed	fishnet	remora	8.11984e-07	0.000399395	0.965586
01227825-8892-4199-b9b4-d40bbcc25ddf	fishnet	remora	2.05637e-07	0.000160106	0.988198
0122da72-a8a5-4b6b-ab7e-38d6e8b59d09	fishnet	remora	7.19543e-07	0.000466565	0.987839
0123093c-1096-446c-996d-695ed57920dc	fishnet	remora	9.88095e-07	0.000813254	0.979266
0123e190-bde0-497f-a80b-10d294c3a5fe	fishnet	remora	5.13577e-07	0.000266113	0.983489
01244c7c-0c8f-416f-9ec4-c0a6fd05a844	fishnet	remora	1.72487e-06	0.00099882	0.981897
01248c48-5738-47e7-80d4-c401bedc9790	fishnet	remora	1.82511e-06	0.000351269	0.97082
0125ae7b-27eb-47ad-84ce-c00e2db3d3d1	fishnet	remora	6.17239e-07	0.000529591	0.98675
0125b6d8-83de-49b8-89c3-ba01319932e2	fishnet	remora	6.84244e-07	0.000255806	0.982529
0125f929-2181-44ad-b531-cab2d0148f64	fishnet	remora	2.11105e-06	0.000437609	0.951024
01271cbe-981f-40c0-a7a6-bb6de4537df5	fishnet	remora	1.27033e-06	0.00043112	0.972222
0127d922-9545-4bb6-ae82-1eda149eb665	fishnet	remora	7.92497e-07	0.000389392	0.976228
0127f4e9-91bf-4bc0-a84b-429d3b79dfac	fishnet	remora	5.86986e-07	0.000251189	0.974935
0127f58e-bece-4875-8748-2b27e5820f3a	fishnet	remora	3.24266e-07	0.000255452	0.985406
012900fd-91de-4cb3-969d-651057c6414e	fishnet	remora	7.37263e-07	0.000266441	0.975026
012a4cbb-3307-462c-8f93-cbe45b4eb79f	fishnet	remora	7.08561e-07	0.000539821	0.972023
012a8628-3e60-4d37-982a-cd40b6293745	fishnet	remora	6.04479e-07	0.000362148	0.983371
012bcb85-3112-4a4d-be80-833ec4ba510a	fishnet	remora	8.69108e-07	0.000579027	0.966191
012c53cd-f40d-4474-93f1-f91791552cc4	fishnet	remora	1.84628e-06	0.000329629	0.936956
012ce04c-2b35-4500-844d-907ea69845b3	fishnet	remora	8.57321e-07	0.000263678	0.967707
012d897d-bef3-452a-9183-b1c1e1bbf582	fishnet	remora	1.11681e-06	0.000766855	0.973138
012e4ee4-c025-4432-8d48-4609047dbe1d	fishnet	remora	5.31813e-07	0.00038525	0.980284
012e7fdc-dd4a-4470-9aa4-62c751a82cd8	fishnet	remora	3.80835e-07	0.000357817	0.990802
012eb643-b248-49ac-b9f3-b08ddeed3b3b	fishnet	remora	8.65301e-07	0.000279681	0.957611
012f432d-18d7-46e4-9f5e-c730d50c9271	fishnet	remora	9.2031e-07	0.00036239	0.982357
01301d0a-3798-47d4-a522-65e98e4094c8	fishnet	remora	6.08116e-07	0.000570615	0.977844
01307c07-9499-4aeb-842c-aa9508f6f3c4	fishnet	remora	3.62888e-07	0.000226967	0.987251
0130bd11-4168-4131-bf5f-250bc6c7d531	fishnet	remora	8.40777e-07	0.00120007	0.988946
0130f287-9aa4-45bd-95ae-731cd67c8fe6	fishnet	remora	8.99883e-07	0.000332927	0.975161
01321f86-f3fb-4584-886f-6c5f18e27a2d	fishnet	remora	5.9586e-07	0.000550076	0.97657
0132441e-fc4d-4934-b2ac-316b6c1756f5	fishnet	remora	3.85054e-07	0.000473761	0.985421
0132f0b8-6e85-4ced-a998-54fc184dc090	fishnet	remora	3.57708e-07	0.000271234	0.98161
01336ffe-661b-41b7-8a76-33bf9feecf1c	fishnet	remora	2.27417e-06	0.000705073	0.963559
01350559-dfbe-4da9-bc69-6610da81f0d4	fishnet	remora	5.19246e-07	0.000395526	0.983006
01352bd1-4001-41dd-abe2-781b659220ed	fishnet	remora	3.09299e-07	0.000275793	0.99395
01353ef5-0585-47b7-be4e-c60b9317de3a	fishnet	remora	1.74747e-06	0.0006949	0.971619
013552c2-f66d-4704-ae13-8ff9638d192a	fishnet	remora	7.40261e-07	0.000474258	0.975639
01358b13-0b9f-4087-8f4c-a77d42a62bc8	fishnet	remora	2.53628e-07	0.000177381	0.984532
01375d00-c12f-4655-aaa8-77af1b4dd5ec	fishnet	remora	5.49214e-07	0.000300707	0.985848
013886e1-0e47-4c18-98f8-6fbfe0b14dd5	fishnet	remora	1.08248e-06	0.00081809	0.970995
01392cd9-c9f9-48c4-ad7c-571942c67984	fishnet	remora	1.54178e-07	0.000268285	0.99259
0139501d-1626-4688-9775-7d2d5cddcf87	fishnet	remora	1.0957e-06	0.00149788	0.978691
0139a6ba-d311-403c-ae84-308fc20ba232	fishnet	remora	9.18126e-07	0.000512589	0.968654
013ab60a-48a1-498c-9665-1653f1258b58	fishnet	remora	9.83919e-07	0.000434748	0.975822
013b3648-c282-4e26-a3dd-c05b97be3e27	fishnet	remora	3.83514e-07	0.000245749	0.992223
013b7dde-95b1-4feb-80f8-dd907001493b	fishnet	remora	1.09607e-06	0.000473149	0.972952
013d1bb1-1afa-47d5-8894-95fe256128d7	fishnet	remora	5.61148e-07	0.00027488	0.969371
013d763c-00d8-44a2-8c2a-7ed44ecb36f8	fishnet	remora	1.13603e-06	0.000448533	0.966495
013dcaed-0585-4e1c-af2c-d1643d417a3c	fishnet	remora	1.30206e-06	0.000797448	0.97705
013dfd77-6d4d-4c0c-981f-8f6093c3ab09	fishnet	remora	8.31195e-07	0.000739808	0.983395
013e234d-7215-403b-aba6-e5fd33f976ab	fishnet	remora	7.03658e-07	0.000234663	0.969285
01416fb2-bb68-43a3-a790-a05120484627	fishnet	remora	1.98184e-06	0.00113709	0.949279
0141a2c2-36b5-4774-8aac-2c1ef4e5114f	fishnet	remora	8.24806e-07	0.00042187	0.97856
0141f3e6-2bf5-4fbf-bc0a-1a9c5a6755ff	fishnet	remora	9.33274e-07	0.000410919	0.986268
014289ec-a80f-408d-ac3d-d28ab97743f7	fishnet	remora	5.33254e-07	0.000269724	0.985714
014389bf-0532-40cb-8fa1-e68f2913aecc	fishnet	remora	5.31654e-07	0.000183474	0.969223
0143aecc-e261-4db9-9a0f-2bc61a4ba417	fishnet	remora	7.85045e-07	0.000267377	0.973594
0143c0e4-f473-499b-83aa-eedb76ddce43	fishnet	remora	7.50652e-07	0.000320471	0.983033
01452a5f-8e8a-4a46-8c24-2d8b25dadcbe	fishnet	remora	6.22615e-07	0.00035389	0.985343
014573d1-7fd9-4736-b7b9-0ef1fd7de953	fishnet	remora	4.14105e-07	0.000245038	0.986023
0146128d-af38-4da2-a5bb-a6acf884178d	fishnet	remora	8.96877e-07	0.000436176	0.978079
0146e2fe-b042-4982-973b-38884f5c7ed2	fishnet	remora	8.02026e-07	0.000446653	0.972588
01488373-b852-43fe-88e5-a5aa8263613f	fishnet	remora	1.00446e-06	0.000663906	0.982456
0149a5bc-ee19-4533-a8b1-083e6a74a6ed	fishnet	remora	5.63088e-07	0.000490097	0.985108
014bc01f-79eb-4b6d-8350-15b92581c424	fishnet	remora	9.41051e-07	0.000581909	0.973874
014cab39-f4d0-47b2-8081-3d64c2d8c492	fishnet	remora	6.36246e-07	0.000350849	0.974762
014cca0d-4017-4054-8109-5b128550a48c	fishnet	remora	8.85646e-07	0.000475332	0.970362
014d4d8d-82c8-4e05-bb9f-24fea7c1f7e7	fishnet	remora	3.89009e-07	0.000391072	0.977347
014d7135-154a-418f-8f90-05e2cee27b84	fishnet	remora	4.14291e-06	0.00346655	0.985271
014e1916-6372-4f3d-a7e7-d20a7685bee0	fishnet	remora	7.02504e-07	0.00063488	0.972608
014e44f7-1515-458e-b8e0-6fd2e8c5ba14	fishnet	remora	2.55055e-06	0.000938053	0.965026
014eabb2-be7a-4474-a12f-b7de23a11250	fishnet	remora	2.13597e-07	0.000120646	0.987278
014f9b1b-e2aa-4f09-817c-6488dc1c2dd5	fishnet	remora	3.3382e-07	0.000493448	0.992855
015094c5-d875-4ec2-bf8b-123dccfd1f8a	fishnet	remora	9.51271e-07	0.000567673	0.976507
0150a03d-f6cc-4648-93c9-c556ab0b1685	fishnet	remora	1.11531e-06	0.000504528	0.971152
0151ce03-2185-43eb-8e2a-3113d223a6f2	fishnet	remora	6.30425e-07	0.000343806	0.981709
0154138b-87de-43e8-8f67-95a1f4417fa7	fishnet	remora	6.42416e-07	0.000258246	0.976063
01542549-9c7d-4f94-8cdf-c7fa18fbeb45	fishnet	remora	8.54056e-07	0.000291945	0.958927
015433c8-72a7-4280-bbda-8ab5139efcf1	fishnet	remora	3.8322e-07	0.000173734	0.986594
01546d30-507c-47c9-bed4-413cc95ecb6c	fishnet	remora	5.69821e-07	0.000386718	0.979678
01548ca1-8f7b-4402-a3a1-0fefbc041a7a	fishnet	remora	1.29131e-06	0.000400726	0.958885
0156058b-4732-40cc-8b4a-f361706790bb	fishnet	remora	1.06096e-06	0.000377684	0.974514
01568aba-9621-41c6-baa3-3168c21a08c1	fishnet	remora	7.72907e-07	0.000400916	0.985877
0156c228-a80f-4c19-a9f3-6c8fbb2c4f2e	fishnet	remora	3.29522e-07	0.000283857	0.989376
0156db18-44bb-44fb-99d0-3a2d673b0ebd	fishnet	remora	2.56899e-06	0.000800069	0.954841
0157027e-6a2e-48dc-a8e2-ccf444a9740e	fishnet	remora	4.07486e-07	0.000336018	0.97913
01570a9d-a4ee-439d-9a61-626969942bad	fishnet	remora	2.4321e-06	0.00209032	0.986761
015736ac-fa9d-45c6-b75d-7b7755096f9b	fishnet	remora	5.28175e-07	0.000307816	0.983326
015747d6-3e1a-416d-b343-d3f309b3c8d1	fishnet	remora	4.76003e-07	0.000399419	0.986288
0158e921-d0b3-4ec2-9a9e-408220b77bdd	fishnet	remora	8.55008e-07	0.000332297	0.977755
015905d9-d4a9-4702-81d6-2536f521e3f7	fishnet	remora	2.65022e-06	0.00117502	0.973008
015917ed-de46-452a-8652-ec8f87b6d34b	fishnet	remora	4.42176e-07	0.000425055	0.978703
0159ebd2-5745-4944-ad42-9b3ca73626d0	fishnet	remora	2.6605e-06	0.000707377	0.954102
015baa3a-d348-475e-83ce-c1cc5582454f	fishnet	remora	6.01085e-07	0.000267195	0.976973
015cfaf4-0233-45e7-ac39-2bec04ae43a5	fishnet	remora	1.07557e-06	0.000525859	0.972171
015d000c-05d2-45b1-90c8-3ee8f66d3e19	fishnet	remora	7.7559e-07	0.000455273	0.97735
015d73b2-a852-4929-9634-18d2a96cbd76	fishnet	remora	6.2392e-07	0.000354756	0.967643
015e4506-3dbc-41a9-a613-8d93f2d71814	fishnet	remora	8.02755e-07	0.000376123	0.972103
015f3c67-7f24-4db7-981b-be1aced2466c	fishnet	remora	3.77288e-07	0.00023156	0.985484
015f4b57-f85e-4d9c-baf2-50a7ce33eb53	fishnet	remora	1.25853e-06	0.000379041	0.969888
015fc6cb-49f2-4d68-a2ae-ac4090bfb1b9	fishnet	remora	2.69259e-07	0.000138837	0.988797
0160d670-155c-437f-83cc-5f0efd310439	fishnet	remora	8.49328e-07	0.000412687	0.971999
0160f52b-5ae5-463d-8651-ce6313cdb366	fishnet	remora	6.65799e-07	0.000589706	0.984554
0163ed58-5488-4722-a995-5e5270aba365	fishnet	remora	2.70227e-07	0.000243832	0.992995
0164b2ef-d55d-495b-8374-414d11511983	fishnet	remora	1.6378e-06	0.00101593	0.982936
0164d745-2aa9-4f5d-939c-0dcdb7a37ce1	fishnet	remora	2.40807e-07	0.000473856	0.995411
01662824-b269-47f9-abb2-a238344752be	fishnet	remora	5.3787e-07	0.000365116	0.974152
01662ac0-555c-4796-b82d-e7c53c0fe6d3	fishnet	remora	2.16084e-07	0.000180738	0.993437
016696fd-6d46-403e-b2d1-17fd5d9e5268	fishnet	remora	3.66626e-07	0.000470242	0.991217
0166d7f0-34bb-4d04-823c-fa6d37fec705	fishnet	remora	2.57739e-07	0.000179914	0.994417
016725bc-f2a7-40a2-91b3-ea63df375a32	fishnet	remora	9.29203e-07	0.000434492	0.966632
01673a8f-628a-45f4-bbc8-7bdae3b29f4d	fishnet	remora	2.34114e-07	0.000309334	0.990239
01676bb8-cd2d-4687-bd1d-ee6003dd72c8	fishnet	remora	1.66788e-06	0.000518375	0.958002
016828de-d3e6-4378-9944-4faac4fde289	fishnet	remora	3.10874e-07	0.0002301	0.985566
01683ca1-4754-463e-9306-91f6438d46ea	fishnet	remora	4.58973e-07	0.000399464	0.987515
0168e94d-56d9-4bf7-a979-813faacf20a9	fishnet	remora	7.48229e-07	0.000256814	0.970502
016912a3-bdc4-4393-bbe3-2dec7692054c	fishnet	remora	4.16362e-07	0.000259568	0.979069
01691d23-c863-4a8e-8b56-725f4ea02fe1	fishnet	remora	1.87918e-06	0.00128632	0.958749
0169c8d4-115d-47a1-9269-5eea314be121	fishnet	remora	1.20361e-06	0.000748503	0.981071
016aae5b-ab89-478c-bf2a-314e98bb59e1	fishnet	remora	4.8067e-07	0.000296969	0.98943
016b74e2-e0e7-4ca3-8a71-b4ee629475ef	fishnet	remora	4.72055e-07	0.000231881	0.981564
016b874a-c30a-4d2e-aae1-2e52dea122d5	fishnet	remora	5.6163e-07	0.000314903	0.975852
016c255c-1b66-4d96-88eb-2a2801c015ee	fishnet	remora	3.23366e-07	0.000240023	0.983729
016ca378-ef46-458c-b413-a9d16b5ac114	fishnet	remora	9.62586e-07	0.000641757	0.984113
016d743e-296b-4924-afa8-545d8e98256a	fishnet	remora	8.23679e-07	0.000498349	0.98385
0170b2d2-d6c9-4c4c-b58f-0d0870660662	fishnet	remora	1.21282e-06	0.000434431	0.963388
0170be60-07bc-44a1-a679-d07d5d3b19d3	fishnet	remora	1.13868e-06	0.000390367	0.965901
0170f9c5-61cd-4056-8cdb-4c93d51e8d3a	fishnet	remora	1.94563e-06	0.00264936	0.977435
0173f757-5ca0-49c5-8d8b-6a2597c8bc1f	fishnet	remora	6.1551e-07	0.000317028	0.975579
017470ce-2292-4c68-acdb-7f995a827f75	fishnet	remora	2.56481e-07	0.000224181	0.986814
0175f001-574e-4c78-af04-9e8420246cd3	fishnet	remora	8.7264e-07	0.000364551	0.972697
0176bd27-3efe-4fde-a3ad-b8404bf2d897	fishnet	remora	4.32295e-07	0.000405854	0.989046
01776bd8-ce81-4efc-9c56-f20fc07c2b91	fishnet	remora	8.86189e-07	0.000318899	0.971171
0177cf6e-b8f5-471b-b8db-b36d43d9854a	fishnet	remora	4.66355e-07	0.000318391	0.973724
01781da5-4abb-4f7e-a020-cca1f13de897	fishnet	remora	5.29857e-07	0.000192243	0.972833
01793930-a011-4e07-9d98-62853ad5f42d	fishnet	remora	5.98419e-07	0.00070157	0.981489
017a0250-7bb7-4fed-88fc-a4408dea90e2	fishnet	remora	7.85051e-07	0.000545025	0.978097
017a4be7-8fe7-4626-9f27-e2e28599be8d	fishnet	remora	2.07255e-06	0.0012651	0.96647
017a885a-9666-4103-97d6-d9024d326d99	fishnet	remora	7.03728e-07	0.000221893	0.971098
017abbcf-d333-4499-a5be-d4d3db552458	fishnet	remora	2.52621e-06	0.00126504	0.968074
017b73d6-4eda-4ee3-ab64-ba8e959e2635	fishnet	remora	3.58854e-07	0.000177563	0.979487
017bd43c-dedd-460a-8d23-6eb581e228b8	fishnet	remora	2.57792e-07	0.000337425	0.988988
017c3421-ec88-4e83-9008-0526568c1d5d	fishnet	remora	7.7037e-07	0.000417325	0.971698
017db649-a135-43da-ba2f-d3993bc8ffa2	fishnet	remora	3.45143e-07	0.000330761	0.99049
017dbc55-5218-4069-a983-7302178c3a29	fishnet	remora	5.35401e-07	0.000665535	0.983018
017dc9ab-8c6e-4f68-8ff2-1f3bff149a6a	fishnet	remora	9.87635e-07	0.000399664	0.975729
017e355e-5834-4f37-9033-827cc15934f4	fishnet	remora	6.03397e-07	0.000191222	0.973199
017e60c9-7295-493d-9fef-d6b13819e186	fishnet	remora	4.96346e-07	0.000231138	0.977048
017fd26f-02e0-48ca-8930-8401be48f049	fishnet	remora	7.75068e-07	0.000234362	0.96715
0182581b-9ed7-4b14-9f43-33b25d6b8521	fishnet	remora	4.78523e-07	0.00028885	0.972329
01836581-1c24-451a-8028-db76872d2097	fishnet	remora	1.52098e-06	0.000547326	0.975227
01848bb0-0db1-4cc0-b6ff-86cc5d59b8d8	fishnet	remora	8.9509e-06	0.0020393	0.956417
0184eeeb-7800-49a3-9e2c-c1620741ad19	fishnet	remora	1.04017e-06	0.000410716	0.956269
01862550-2603-4a32-bb46-ef3e89ebe80f	fishnet	remora	2.53302e-07	0.000225116	0.991142
01862c91-1362-4bda-9e19-543f2273524f	fishnet	remora	5.86472e-07	0.000345371	0.979263
0186a5eb-3f7c-4724-9f78-8b8fc2f68a21	fishnet	remora	6.31895e-07	0.000557286	0.977634
0186b471-91ad-4cc2-803a-70cba77426a3	fishnet	remora	1.28706e-06	0.000791197	0.982555
0186cfca-caaf-4ce3-91d5-5782188fe3c1	fishnet	remora	1.06448e-06	0.000463217	0.979493
01877bc1-cb96-4a59-8be1-92090fb6c345	fishnet	remora	1.6916e-07	0.000175649	0.990642
01894a3b-ce28-4ff3-a25e-7690007fab45	fishnet	remora	4.57984e-07	0.000227767	0.982615
018952ec-7fe8-4af0-b642-7bcdb925e0f1	fishnet	remora	1.07289e-06	0.00104807	0.976177
018967f9-a56f-4c3d-88b9-aa3987a44f47	fishnet	remora	2.33991e-07	0.000262575	0.989171
01898d0f-28c6-49a3-91e0-5073adb80716	fishnet	remora	2.82812e-07	0.000217352	0.987287
0189af72-db34-438a-8993-b96c8e03cc81	fishnet	remora	5.03616e-07	0.00050299	0.978608
0189efad-a35d-4f91-95a2-6892ad7ec83c	fishnet	remora	1.34445e-06	0.000419496	0.966221
018a375f-26ab-4e77-b8a5-4f14b57abefa	fishnet	remora	3.77566e-07	0.000349415	0.984607
018b2525-8fe3-4715-9a8c-94d8eb12cdaa	fishnet	remora	7.3101e-07	0.000339401	0.978893
018b971e-c5ef-4df5-8093-b498c47ac200	fishnet	remora	8.49141e-07	0.000448063	0.971192
018b9b75-28b0-4917-ad8e-7be906798038	fishnet	remora	6.3571e-07	0.000291992	0.979811
018ba646-db10-4d1a-ba1a-ff7b541aef39	fishnet	remora	8.01358e-07	0.000552878	0.983144
018dc7ec-0b0a-483e-b1eb-d9536ba13655	fishnet	remora	1.84483e-06	0.000743052	0.975698
018df9a5-4553-404c-8661-9982cb22ab79	fishnet	remora	2.63988e-07	0.000338083	0.991065
018e99f3-ea30-4fd2-a935-283f358ee660	fishnet	remora	3.74533e-06	0.00104527	0.965769
018fc2ff-61d7-4488-996d-37bc0ce518bc	fishnet	remora	5.06433e-07	0.000277546	0.97755
01900df6-2ffe-46c8-a3d8-5e882573eec6	fishnet	remora	4.65053e-07	0.000359989	0.975252
0190129c-2cc8-41bb-9455-aae2e062ab7d	fishnet	remora	7.00359e-07	0.000420656	0.979219
01909eb5-794b-434f-972b-06d9a4fa1a48	fishnet	remora	5.96061e-07	0.000413435	0.982355
019290dc-4eee-40b1-9057-0a1ee730df48	fishnet	remora	4.20509e-07	0.000266817	0.977413
0192b3e5-3010-4018-9ce5-feb29f41d9c1	fishnet	remora	4.38205e-07	0.00022595	0.976553
0192c62d-730b-430c-a7cd-efb5e48878b0	fishnet	remora	4.26506e-07	0.000306351	0.985169
0193452a-4c7e-4523-a069-4e4de4d027b0	fishnet	remora	6.21002e-07	0.000230366	0.977277
01952170-ff9f-46da-a0b8-6bae8acc8e1b	fishnet	remora	1.08008e-06	0.000414942	0.959874
0195e05c-66d5-4b9f-b259-bc114754646e	fishnet	remora	2.27301e-06	0.000781997	0.963416
01965b96-da1b-4057-a845-f6f3297d9e05	fishnet	remora	2.87095e-07	0.000260082	0.986402
0196605e-78c3-48cb-bbf8-b1d80582afad	fishnet	remora	1.7333e-07	0.00018412	0.992922
0196fa01-e14c-4ddb-bbf5-747deafc88d9	fishnet	remora	4.87052e-07	0.000878697	0.98558
01973a9d-302e-4657-a58a-bb8a6851ae60	fishnet	remora	4.15183e-07	0.000253051	0.979024
019779ef-90ae-4fa3-a4c8-8dd6db1fbeae	fishnet	remora	2.37333e-06	0.0006051	0.956352
0197e573-430a-48cf-9049-5ed26908cbed	fishnet	remora	9.4847e-07	0.000242368	0.964256
0197fe2f-c222-44fd-aef4-c7184682adc5	fishnet	remora	5.11176e-07	0.000262982	0.975522
019820bb-d43c-4794-b326-0dfdb9055e1f	fishnet	remora	9.82974e-07	0.0003527	0.97454
01985a1a-dc82-4cbe-af16-bc90fd16e411	fishnet	remora	1.60201e-07	0.000179725	0.993597
01987dbd-16d4-46c8-8e72-896d572824a9	fishnet	remora	9.93566e-07	0.000456379	0.970359
0199340b-b028-4fac-b3da-aade707f8e54	fishnet	remora	6.18199e-07	0.000421295	0.97839
019a9c19-2256-4e01-aab4-a764a34413b8	fishnet	remora	5.0315e-07	0.000223495	0.983558
019d34a1-397d-4898-83b8-496150db2f10	fishnet	remora	3.4003e-07	0.000170443	0.990772
019dfbd7-7e60-4ff6-8e40-90658cfa5ba9	fishnet	remora	4.10521e-06	0.000707802	0.944733
019e2439-3f24-42f0-826b-920299f0701c	fishnet	remora	3.8069e-07	0.000214698	0.992253
019e60b1-d24a-4294-968e-067000bbce15	fishnet	remora	1.73363e-06	0.000492566	0.935985
019f8465-2b8c-4a32-9b94-33e737d7831e	fishnet	remora	5.68486e-07	0.000464672	0.982046
01a078c0-5a1b-4b78-859b-2dc16742f8d7	fishnet	remora	7.93984e-07	0.000336649	0.969356
01a21102-5a42-4eb2-893c-01ad7e5175e9	fishnet	remora	1.43895e-06	0.000408117	0.973178
01a228f6-0445-4265-a733-795e8356c891	fishnet	remora	6.53931e-07	0.000287982	0.974419
01a2729d-27a0-4e5e-8d59-7fc0892e8c96	fishnet	remora	5.05374e-07	0.000296033	0.983154
01a27b79-453e-468a-9b92-d6ad461a9382	fishnet	remora	1.45767e-06	0.000494709	0.948974
01a2aeaa-31d5-4549-923f-6a98e1cc0611	fishnet	remora	3.00119e-07	0.00026151	0.989003
01a2ca3d-6324-4dd9-b64b-3e0b3ddd41c6	fishnet	remora	2.46418e-07	0.000365047	0.99401
01a2d942-6802-4cff-9d04-31ec6e5cfbfe	fishnet	remora	1.05083e-06	0.000544514	0.970182
01a387c3-a1ff-4f6b-a300-711ba3fd8097	fishnet	remora	3.22869e-07	0.000332817	0.987723
01a51fe3-f923-47ad-a72c-c91c04d1fc07	fishnet	remora	1.71897e-06	0.000627265	0.973049
01a56a46-ef9c-42a7-aa69-aec8e8563f1d	fishnet	remora	6.16226e-07	0.00029254	0.98366
01a5a624-a229-414f-9563-0359bb58cded	fishnet	remora	3.39649e-06	0.00141635	0.932412
01a5db3f-255a-4476-a6d6-7e6485302352	fishnet	remora	6.92501e-07	0.00121906	0.988022
01a6dbb4-9420-4da2-8b79-3aad0646523d	fishnet	remora	4.59123e-07	0.000561328	0.981395
01a757cd-077c-4513-a327-c7e8372b1616	fishnet	remora	8.56207e-07	0.000389301	0.976042
01a8ccc4-395a-44c0-b2fe-512f5551438b	fishnet	remora	1.24984e-06	0.000415561	0.96158
01a8dcb6-efde-4d8d-a41c-a03b7ef7776e	fishnet	remora	1.3097e-06	0.000346933	0.965063
01a950ff-a766-4d02-b01a-f9702bc3a409	fishnet	remora	6.45545e-07	0.000379923	0.977424
01a9f1fe-e0e0-4c49-ae3c-da0bdfa94332	fishnet	remora	2.76876e-07	0.000267769	0.983804
01aab995-e37e-47f9-aeb0-af79feff2df6	fishnet	remora	3.7183e-07	0.000306332	0.983725
01ab0dc9-9c6e-4a62-9449-f260bef2e0f6	fishnet	remora	1.59524e-06	0.000696124	0.977969
01ab1b00-e5b1-4940-87c3-fcc099de16f0	fishnet	remora	1.01096e-06	0.000541325	0.973781
01abac81-e8ad-4ed3-8640-841a1e27ea20	fishnet	remora	7.94267e-07	0.000367505	0.964955
01ac97de-d5c8-4eec-95d5-201e37c08f53	fishnet	remora	1.5861e-07	0.000132092	0.993996
01ad12a7-53d7-45d4-acaf-34124d52f793	fishnet	remora	6.06855e-07	0.000313633	0.979064
01ad27a5-7ee3-4a36-976a-fe8dc5f3cacb	fishnet	remora	1.36228e-06	0.000529806	0.963575
01ad31b9-ab3c-4ae0-873c-6def2c689d6f	fishnet	remora	1.59364e-06	0.00052435	0.962842
01adef8d-fb96-4f13-8154-15c9e54cc8df	fishnet	remora	1.9098e-06	0.000573974	0.960148
01b15d8c-959e-4d75-8a43-a7c0a2fef511	fishnet	remora	3.63631e-07	0.000280854	0.991993
01b1e2c0-4c8f-4974-8aae-114ec5acb07e	fishnet	remora	9.30634e-07	0.000555219	0.971914
01b3f95b-ec73-4f4d-bd58-14e847c76f35	fishnet	remora	5.43027e-07	0.0005394	0.98414
01b49131-f208-487b-99f7-d497121beef6	fishnet	remora	9.54576e-07	0.000259978	0.966859
01b53ae4-085e-480c-acbd-b7788f88b593	fishnet	remora	1.11262e-06	0.000445698	0.978127
01b6e735-91f5-4674-abd9-30041b65bc7c	fishnet	remora	5.38117e-07	0.00027089	0.979429
01b7255a-dd75-4c5b-9746-b5f36ff72cda	fishnet	remora	1.21766e-06	0.000449691	0.978751
01b74c9d-da6c-46ab-8bfa-98de25432a8b	fishnet	remora	6.41235e-07	0.000245138	0.968136
01b7e60c-90af-4bf2-8f43-7a599d669077	fishnet	remora	8.67997e-07	0.000623419	0.974728
01b7f6d0-043e-49ff-a993-371a9ed19b9e	fishnet	remora	3.53514e-07	0.000349657	0.986993
01b83dd1-7f7f-40a1-b799-9a2611c45783	fishnet	remora	9.87949e-07	0.000320827	0.966989
01b892e2-577a-406f-8c5e-c185e1434678	fishnet	remora	1.7723e-07	0.000177942	0.989473
01b89d3e-3265-49ae-9903-9bf0d0eeacb1	fishnet	remora	1.23946e-06	0.000378184	0.967675
01b99b4b-76f3-41c9-93fa-aaf2ea1ad1bd	fishnet	remora	5.05519e-07	0.000231248	0.985368
01bcafef-1be0-4eea-aeda-16b63654bbac	fishnet	remora	7.99862e-07	0.000547023	0.983032
01bd4761-cc5f-4aee-b883-03b5a4c1b195	fishnet	remora	1.36964e-06	0.000434469	0.966247
01bd4d23-2a69-4a59-8576-cf58e21d210f	fishnet	remora	6.78712e-07	0.000390439	0.972645
01bdc0af-d678-4df3-a9da-c5d6b1477a53	fishnet	remora	8.28096e-07	0.000334705	0.965101
01be82c9-7678-40e9-8af1-af8e799b1ab0	fishnet	remora	2.47413e-07	0.000312024	0.988633
01bec7c5-2c46-44b6-b5fa-f874762b173b	fishnet	remora	8.99123e-07	0.000559888	0.98185
01bf1f5a-3d04-4adc-83b2-94cdb214ea0c	fishnet	remora	9.90686e-07	0.000374554	0.962579
01c0760a-43ee-422d-8651-59bff0c50590	fishnet	remora	1.0823e-06	0.000857167	0.960339
01c0e343-79da-4908-9f98-128f587f8f39	fishnet	remora	8.21905e-07	0.000258737	0.960324
01c0f7e2-6ad9-4b41-b6eb-59e56792ecf1	fishnet	remora	4.39708e-07	0.000343867	0.983411
01c16e11-5311-476a-9e2c-2890fbed0834	fishnet	remora	5.03116e-07	0.000280125	0.97873
01c1a05a-732e-48ce-a3cd-8d7271873dd9	fishnet	remora	1.71052e-06	0.000967787	0.971435
01c28710-f6d2-4553-8e95-9f84409879d3	fishnet	remora	6.71034e-07	0.000251394	0.975858
01c2f0f7-efce-4ffc-a805-1ea66a4dd0da	fishnet	remora	1.30542e-06	0.00132377	0.974968
01c3b247-fa7e-4744-8469-d839777f5a64	fishnet	remora	7.32846e-07	0.000256836	0.96762
01c44633-5257-4d9f-9d2b-1482a6c67a20	fishnet	remora	1.17579e-06	0.000379507	0.978643
01c44a5a-9f12-4173-bca2-fe341875dbd5	fishnet	remora	1.86269e-06	0.000967708	0.972976
01c4593d-c1c6-4df6-9aca-2cc71e1269ea	fishnet	remora	1.50891e-06	0.000410264	0.962822
01c48568-914a-4fb4-b858-c229d3386161	fishnet	remora	1.34242e-06	0.000381706	0.960857
01c4c6fd-c943-4e8b-a2d3-e79bde6af2ae	fishnet	remora	1.88558e-07	0.000202805	0.994745
01c50da7-3138-4d61-9fc8-ac255179a793	fishnet	remora	3.5921e-07	0.000382152	0.985856
01c5ba59-ed7e-4501-9bbe-1d79df1fa8a5	fishnet	remora	7.88037e-07	0.000349766	0.976489
01c72402-4938-4033-a919-3b0081b4aa55	fishnet	remora	7.30421e-07	0.000281135	0.964282
01c8bf20-60fc-4a03-9e84-1fd08b4635d0	fishnet	remora	4.9738e-07	0.000195988	0.979692
01c9d006-c621-49bd-8a79-b803ab77eff3	fishnet	remora	4.44399e-07	0.00047041	0.991332
01cace02-e20f-48ba-be2d-25fd79778b3a	fishnet	remora	3.90954e-07	0.000215975	0.984786
01cd57fe-f692-4bd2-836e-f42fd545ac3f	fishnet	remora	6.26031e-07	0.000405086	0.980744
01ced19a-7b18-499e-bc9c-2cdcb2c542b9	fishnet	remora	7.36108e-07	0.000462397	0.96838
01cfe4ef-1f26-4aee-a4d3-7233c33e6ba9	fishnet	remora	4.35222e-07	0.000343303	0.979719
01d072f1-9d4b-4886-8cd1-8f6d94c01258	fishnet	remora	8.41151e-08	0.000107074	0.994235
01d19951-75ab-4674-a12c-8166f5978d92	fishnet	remora	2.00505e-07	0.000441423	0.995789
01d322fe-6be1-470d-806a-9e65da8d1d89	fishnet	remora	5.05439e-07	0.00030021	0.981515
01d34a0a-c89f-4460-bc24-308bd7c0b830	fishnet	remora	9.28241e-07	0.000467229	0.978423
01d41af0-6622-427c-98d8-7fa3c1668e98	fishnet	remora	1.44228e-07	0.000128847	0.991557
01d47672-97e2-4fd6-911c-624bab99f5c2	fishnet	remora	1.77417e-06	0.0004363	0.926991
01d4b94c-de6f-4fe2-a6cf-518fce315715	fishnet	remora	7.7166e-07	0.000364554	0.975284
01d4de18-9fd6-4170-a024-21ddb462ee77	fishnet	remora	3.58884e-07	0.000740128	0.988306
01d4e8cb-3b34-43bc-9466-03a50dfb947a	fishnet	remora	2.05706e-06	0.000658453	0.960067
01d57b21-27bd-44fd-99ca-d9122ebe9242	fishnet	remora	7.18662e-07	0.000325175	0.969212
01d5911e-8f64-4848-909e-97c2ff4ab3de	fishnet	remora	1.55299e-07	0.000208501	0.995487
01d80b15-244c-4b05-aea1-3f13ede0081c	fishnet	remora	7.19739e-07	0.000442347	0.981663
01d92d64-96bc-46dc-9187-5524edfeff7c	fishnet	remora	6.16162e-07	0.000981953	0.979111
01d9898f-25b0-46b0-a97b-a2801e809355	fishnet	remora	9.03846e-07	0.000501851	0.97923
01da0215-604f-425b-9637-1eee8f739396	fishnet	remora	3.60673e-07	0.000348992	0.984783
01da4674-ed64-451f-84e7-37a4e3e4352f	fishnet	remora	5.58402e-07	0.000259165	0.971658
01dc2c86-043f-43c0-8a48-03ce650a1cee	fishnet	remora	6.70128e-07	0.000354965	0.979766
01dd3ca7-d9a2-4a89-8d4d-79d961f0d400	fishnet	remora	3.98604e-08	8.28034e-05	0.998288
01dd9b68-aaa2-4bdd-b49e-fad56699c110	fishnet	remora	8.93226e-07	0.00335573	0.974831
01de030d-8498-4d07-98fa-184a1992b391	fishnet	remora	4.92915e-07	0.000185476	0.97333
01de65ca-d0f3-4ada-bf80-1cce581f40f1	fishnet	remora	4.68541e-07	0.000359571	0.983953
01dfadd9-00dd-459e-ac31-e6fac032eeac	fishnet	remora	5.20344e-07	0.000280504	0.981264
01dfbf01-6c0f-43fc-b178-a04e855ee52a	fishnet	remora	8.81839e-07	0.000461984	0.968692
01e09080-b80d-4f96-8ef7-b6c2eb43e614	fishnet	remora	4.01866e-07	0.000226126	0.985097
01e11106-e55e-4ce4-a21e-74f3184c3deb	fishnet	remora	4.60662e-07	0.000217098	0.986514
01e19f53-77fe-4ae2-ad62-3e9c36ea1c81	fishnet	remora	7.09147e-07	0.000471306	0.976427
01e1c379-960f-41a7-89b7-6062ed610f55	fishnet	remora	2.3768e-07	0.000132833	0.991474
01e242ee-923d-482d-a418-bdeadfb0d612	fishnet	remora	1.85151e-06	0.000534686	0.979599
01e25b35-2342-4e95-9bca-da7c7b520776	fishnet	remora	1.70692e-07	0.000408853	0.98983
01e29d66-89de-4a46-ac92-95986fe17f3b	fishnet	remora	2.17283e-07	0.000271339	0.990057
01e2e8a4-d7d5-4a39-ae53-79d755d8b563	fishnet	remora	5.5349e-07	0.00039146	0.975655
01e4472e-c122-4e4e-8075-64ec4338bb69	fishnet	remora	2.13256e-06	0.000558806	0.966348
01e464fb-29cd-4cd1-a9c2-4e1a21b08abc	fishnet	remora	5.43869e-07	0.000324171	0.972842
01e4b79b-b38d-444f-953d-461f60263441	fishnet	remora	4.78899e-07	0.000289199	0.978556
01e545b6-b591-443f-bb63-98cc62a46704	fishnet	remora	2.77193e-07	0.000190501	0.98964
01e55122-4179-43a0-88bc-bd8aa22f6b83	fishnet	remora	9.42753e-07	0.000407404	0.973697
01e670f2-872f-4830-ab87-18bd5d314e11	fishnet	remora	6.68623e-07	0.000492107	0.984759
01e69812-d395-4664-9dc2-6e2ff2ca8660	fishnet	remora	5.88735e-07	0.000604433	0.984661
01e7822d-503e-4b36-a668-57c4be4592dc	fishnet	remora	6.80212e-07	0.000546591	0.984144
01e7cf22-68b9-4840-9be4-8bcee0f27fcb	fishnet	remora	6.75231e-07	0.000306869	0.979651
01e7d5ea-b87e-4ff2-b2fb-15e40cbc083a	fishnet	remora	3.5065e-07	0.000212069	0.981347
01e852d2-e660-47cc-9bd7-d8d275f00a99	fishnet	remora	1.24006e-06	0.000528046	0.978987
01e8d1ba-521c-42bc-a5b8-2847ca505b1f	fishnet	remora	8.0528e-07	0.000426655	0.96841
01e94e42-5230-43ec-a978-9f619d3dac17	fishnet	remora	8.33837e-07	0.000568888	0.962355
01e95f3b-f027-4e1b-83b4-197873b9d274	fishnet	remora	3.0498e-07	0.000421806	0.989586
01eb3241-a67c-4315-9eaa-cfb980d42f95	fishnet	remora	1.69118e-07	0.000151962	0.988418
01eb822c-b02e-4b5e-bf36-352505aac91f	fishnet	remora	6.20415e-07	0.000236577	0.966441
01ebd860-3177-4c85-bebb-ffe5ed464734	fishnet	remora	1.37356e-06	0.000476025	0.958223
01ebe00a-46f8-447c-aef8-d1fc946c75fb	fishnet	remora	1.02821e-06	0.000488053	0.985479
01ec0a79-8fc0-4876-86f1-2d3bcd328cac	fishnet	remora	4.25894e-07	0.000348662	0.991273
01ec1aba-71ec-402b-a1be-397131bc15c4	fishnet	remora	1.45752e-06	0.0014653	0.982171
01ec4aaf-f50a-4398-ab84-d2564c1bf91a	fishnet	remora	3.78836e-07	0.000336042	0.989566
01ef963d-a007-4e7d-bddb-e52c4cf32fcf	fishnet	remora	9.5527e-07	0.000365638	0.979337
01efb777-a74c-4c80-816c-7fbcba6ef967	fishnet	remora	4.06847e-06	0.00137252	0.987689
01f04d4b-8abf-4ce9-9ec7-ef6be359ec3e	fishnet	remora	3.05942e-07	0.000189963	0.990031
01f0d9de-d4a3-4ceb-aafb-80330bca8afc	fishnet	remora	1.1174e-06	0.000409791	0.969906
01f0f29c-5bd9-40ad-8016-9059a4190f33	fishnet	remora	8.95497e-07	0.00037635	0.98428
01f165db-9173-44cf-b940-c563a5437956	fishnet	remora	8.85125e-07	0.000433742	0.964565
01f34584-d660-4b02-a36d-2f1683ac20da	fishnet	remora	5.31313e-07	0.000236874	0.974299
01f34a2f-20f2-42f8-afb9-4848465f2574	fishnet	remora	5.94508e-07	0.000488597	0.992114
01f504e2-e47a-4343-942b-8989f6a98936	fishnet	remora	4.59517e-07	0.0003034	0.987054
01f5d25e-a04b-476f-9006-bc07248301eb	fishnet	remora	2.76161e-07	0.000277398	0.98992
01f7f395-5e22-483d-9392-1367bf284e8a	fishnet	remora	4.58267e-07	0.000318354	0.986734
01f8c4b1-c347-4c1f-998e-6e61a9e3ff3c	fishnet	remora	5.32934e-07	0.000291362	0.972425
01f97b76-987f-4957-b045-8d27fe867788	fishnet	remora	3.25109e-07	0.000361182	0.994625
01fa2425-adb7-46a1-8c6d-b776573bd309	fishnet	remora	1.87362e-06	0.00120953	0.959215
01fbb373-c561-46c5-a36f-21e154fabcc7	fishnet	remora	9.29243e-07	0.00059926	0.982636
01fbbbba-f438-4f9c-8916-c996b9e4b00a	fishnet	remora	1.66208e-07	0.000191397	0.989472
01fbde26-1ea1-478e-bfbc-deb3ccc8774c	fishnet	remora	8.44196e-07	0.000339516	0.97192
01fcdb58-b1d6-42fe-a11d-cdc81d0abd28	fishnet	remora	2.9124e-07	0.000214993	0.992244
01fe1ebf-7969-4b18-ba0b-f69bb0de65f5	fishnet	remora	1.40403e-06	0.000878276	0.972841
01fe2143-addc-4819-982e-2300f833e881	fishnet	remora	1.40155e-06	0.000514344	0.961683
01fe8bfa-1be9-4367-b71e-d059438c2293	fishnet	remora	5.52326e-07	0.000662835	0.984566
02003d23-893b-4056-bad0-c7a65e2a925c	fishnet	remora	1.24859e-06	0.000853194	0.981437
0200660f-7780-4dab-be56-ad85f194aabf	fishnet	remora	7.31613e-07	0.00033953	0.979584
02010f6c-b632-4543-aacf-f214ead6a9c5	fishnet	remora	1.07309e-05	0.00187107	0.965471
02018cbf-730c-4646-a2ec-6af379ce2ab4	fishnet	remora	1.28166e-06	0.000572225	0.975124
0201bcb8-5f30-493a-a739-790a4284fa4d	fishnet	remora	1.09107e-06	0.000841604	0.98569
0201ca65-678e-478d-ac88-4411eca9991c	fishnet	remora	1.00466e-06	0.000428322	0.95948
020244aa-f871-4a8b-8ae9-78f9f846bb6a	fishnet	remora	4.48097e-07	0.000373478	0.98954
02031793-564b-455a-94a2-66ee0f01bf2d	fishnet	remora	2.90959e-07	0.000173404	0.982858
02031ceb-360c-496a-804e-e8f873eec594	fishnet	remora	2.72753e-07	0.000412276	0.987641
0204ec88-c2df-4256-8c21-e3052edaf035	fishnet	remora	5.82145e-07	0.000376413	0.973059
0205387f-8ca3-4eaf-a841-07feef6dca68	fishnet	remora	6.10709e-07	0.000306778	0.983731
0205854f-5328-42f3-96ab-f58e81f64a1c	fishnet	remora	9.0032e-07	0.000295893	0.956408
02064954-c9c5-41df-b6ee-ac3f7892347b	fishnet	remora	9.51029e-07	0.000467447	0.970222
020672a5-ef42-4205-8105-02363b2c1764	fishnet	remora	4.6365e-07	0.000233438	0.983878
0207b4aa-2987-450c-8632-abcb1d2e3125	fishnet	remora	1.16224e-06	0.000486108	0.972163
0207e82f-6740-46cd-9825-640d46fffe17	fishnet	remora	4.70961e-07	0.000400664	0.986089
0208e08e-c3f1-4d54-98c1-67ab73871958	fishnet	remora	4.7868e-07	0.000337052	0.986461
0209c637-9512-4bd0-ab2a-0e416b656c47	fishnet	remora	3.62687e-06	0.00137737	0.95412
020a263c-2e09-45ca-a6ce-05b745bdffb6	fishnet	remora	7.77648e-07	0.000361741	0.96692
020b3365-ba0b-4320-95b0-29224dfd4e9d	fishnet	remora	2.29786e-06	0.000938658	0.95194
020b4ab9-ebce-498d-a3f3-ab4691d5df5b	fishnet	remora	7.55142e-07	0.000286702	0.976712
020b5654-1363-4a4f-bdb8-52c0343dcdaf	fishnet	remora	2.80826e-07	0.000213651	0.990784
020c2606-81db-402c-b3b1-5a6052652f43	fishnet	remora	1.0117e-06	0.000383332	0.963975
020c3426-ff41-42bb-9974-c5ab5dd59cef	fishnet	remora	4.92655e-07	0.000522187	0.982306
020c7ad1-c7d0-4b25-965d-5de60325c9fc	fishnet	remora	2.2917e-07	0.000216904	0.990751
020c7e53-1530-4862-bc3f-2266d96a0a0c	fishnet	remora	9.14577e-07	0.000370165	0.981577
020d5dc6-1354-4c23-a0e3-fbc992d6424a	fishnet	remora	4.02971e-07	0.000196437	0.979679
020dd545-7c61-4af1-91a5-c9af91cdd3bc	fishnet	remora	1.63054e-06	0.000455544	0.962067
020ddce6-f19f-4c80-9995-56a699ec6f47	fishnet	remora	7.38338e-07	0.000232425	0.968201
020e30f9-4efb-43a3-b1ce-c499331fb551	fishnet	remora	3.66903e-07	0.000243868	0.985366
020ee9e7-48b0-4271-8648-1da1a9abe73a	fishnet	remora	1.46784e-06	0.000460772	0.976106
020f0cfc-1331-489a-a650-0a935ca94d23	fishnet	remora	4.43185e-07	0.000169715	0.9806
020f0fbd-9f81-4919-81d3-93dd0bdb7ba3	fishnet	remora	7.67101e-07	0.000761227	0.974348
0211314f-efcc-4665-90d9-f0ccc56cc224	fishnet	remora	6.87167e-07	0.000341504	0.974544
021140c7-fe64-4885-a79f-69e343b70fa8	fishnet	remora	4.4654e-07	0.000236844	0.978786
02118b6c-be50-4d8d-b227-20f066ab1012	fishnet	remora	3.12031e-07	0.000313814	0.987432
0211fbc5-8e85-4906-83e2-2a7905495bf1	fishnet	remora	8.22195e-07	0.000313058	0.967886
021244fb-dd4e-4518-b960-7b59ba7ec3c0	fishnet	remora	3.08985e-07	0.000586689	0.990414
02126552-effc-4b94-8608-0528d3af8908	fishnet	remora	1.12881e-06	0.000355228	0.970613
0213d50a-f7b5-4544-9e8a-6a2175c3e84b	fishnet	remora	1.51292e-06	0.000982085	0.970054
0214f339-0071-4e24-9c0d-2be0088e3d62	fishnet	remora	8.15221e-07	0.000445424	0.971029
0215c622-9ec2-497c-84fd-745b43227506	fishnet	remora	9.56096e-07	0.000332113	0.966571
02160cb8-3468-4f4d-a8c2-cd4e0a4c01cd	fishnet	remora	7.28715e-07	0.000314064	0.965257
0216d4bc-0089-428e-94dd-4de005c05c46	fishnet	remora	5.43162e-07	0.000271129	0.979505
0217ce2f-82e3-4b6f-8845-0f47e6ba88f7	fishnet	remora	2.96108e-07	0.000244738	0.984655
02191394-a581-4f30-9fbc-4f414b4c8f8f	fishnet	remora	3.3444e-06	0.00070667	0.980629
0219c703-ae78-4d2a-a7aa-471b00031198	fishnet	remora	8.01944e-07	0.00077446	0.983541
021daad4-e78a-4573-b3c0-a4b05b061e6f	fishnet	remora	3.50258e-07	0.000203586	0.986007
021df0f1-f65e-4e2d-91ca-22dadfdc2f10	fishnet	remora	4.81145e-07	0.000272095	0.990783
021e177e-fefb-43ae-aa76-755558db695e	fishnet	remora	1.57678e-06	0.000663727	0.964297
021e5dc8-ca7c-4329-ae33-5cb0fd089d7a	fishnet	remora	6.39478e-07	0.00032723	0.984285
021f2bcb-1138-43d9-8c76-20b0833e8de3	fishnet	remora	3.29803e-07	0.00016569	0.984407
021f77fc-9a93-49dd-9faa-2f763974ada7	fishnet	remora	3.2836e-07	0.00020176	0.988018
021f849d-c9c4-4b8e-853a-0d62307259ec	fishnet	remora	1.90322e-06	0.000395629	0.962752
021fc0e6-8534-4d9e-a66a-08cb1e461146	fishnet	remora	6.50824e-07	0.000527192	0.989515
021fd72c-dfdf-4eb6-92a6-25fb8b623df2	fishnet	remora	1.00164e-06	0.000373458	0.960649
021fdf00-5ddc-4870-aa93-17b8859dfe9c	fishnet	remora	3.54641e-07	0.000239262	0.983875
022172f9-fe77-40b8-9fed-e5200b558722	fishnet	remora	3.494e-06	0.00146097	0.967306
0221e32d-0b8c-469b-9909-f2a62d8f043f	fishnet	remora	1.12364e-06	0.00106226	0.959493
0223a611-6bde-4200-a05f-ea34add45ce0	fishnet	remora	9.45925e-07	0.000573285	0.979526
0223ad18-adbd-45ab-95a0-eee8be4ae574	fishnet	remora	7.23679e-07	0.000343861	0.980188
0223c063-7b39-4214-a7be-bb57547d08e5	fishnet	remora	1.49246e-06	0.000465889	0.967976
0223cb41-9e84-489a-89f7-daa37b01b9ed	fishnet	remora	6.49516e-07	0.00201003	0.983169
0225c95c-f821-4e5b-a647-a14026a8b5f3	fishnet	remora	1.10215e-06	0.000486362	0.989015
022667f6-2a2e-4dd4-ab62-c1a8b0448715	fishnet	remora	8.07112e-07	0.000313537	0.979578
02270191-560d-4f63-8f47-c601173b0e91	fishnet	remora	6.71088e-08	0.000140746	0.997254
02271fdf-0ab4-4c67-8d41-d17873002106	fishnet	remora	6.86181e-07	0.00035827	0.974201
022855d0-ee4a-4b86-ab4a-e3a7b0cb4cdc	fishnet	remora	3.13104e-07	0.000218322	0.985382
0228effe-c0ce-4fd5-bb20-e18f6e386244	fishnet	remora	1.87177e-06	0.00078494	0.974829
02292e6c-5832-4de2-8dbb-b76d38cfc522	fishnet	remora	2.64585e-07	0.000225204	0.984206
02295e3a-40fd-4f93-9e56-6b14a1e8e965	fishnet	remora	4.39494e-07	0.000302317	0.984807
022a273f-b219-4640-95e2-ee155e9c4bf4	fishnet	remora	1.61808e-06	0.000492326	0.968401
022b0ec1-54bb-4797-b969-ada51bc2f324	fishnet	remora	5.46303e-07	0.000494808	0.98879
022b1e50-653c-466f-8af9-c7126cba8a05	fishnet	remora	2.95274e-07	0.000331284	0.986965
022b6663-83bc-440f-891e-6628fa5fc420	fishnet	remora	1.28739e-06	0.000536416	0.95094
022b86cf-3a02-4c7a-b0c6-6926f4ea59a3	fishnet	remora	3.14482e-07	0.000375881	0.991493
022ba52b-d538-45dd-9f18-da4484e0912f	fishnet	remora	2.94991e-07	0.000254212	0.984776
022c16f9-264f-475c-8837-d7f6884ce2fa	fishnet	remora	9.71683e-07	0.000350397	0.963457
022c55dc-5785-42ca-990c-ab0e127a2fa8	fishnet	remora	2.94321e-07	0.000212353	0.987548
022e40c6-7ed9-4eb0-9036-ca345582816b	fishnet	remora	1.1325e-06	0.000572416	0.97691
022f7942-0e50-46d4-b69a-b532c3a52176	fishnet	remora	5.06714e-07	0.000405022	0.980912
023071b9-3f29-4d7e-9301-b025ddb7548a	fishnet	remora	4.88805e-07	0.000929403	0.990059
02314ccf-37cb-4852-89b2-9934e96da4f4	fishnet	remora	2.07721e-07	0.000131046	0.991066
02321d47-f1c0-4a1d-9cbe-b013bea66653	fishnet	remora	6.09401e-07	0.000539337	0.980981
02322ef7-3ac4-4261-b187-84054301dd43	fishnet	remora	2.62711e-07	0.000259495	0.985227
02325f56-66a0-4bd4-9b8d-bdd0a5eadcaa	fishnet	remora	9.18498e-07	0.000481102	0.959354
0232a41b-b29c-4e22-b61f-d86910c6dbcf	fishnet	remora	7.61639e-07	0.00059721	0.976467
0235a324-a4b5-47ac-adb3-a2337da8bbd7	fishnet	remora	4.37742e-07	0.000276273	0.976068
023629a4-000e-4918-ac09-bd9e4861c15b	fishnet	remora	1.08944e-06	0.000356125	0.981735
02369a76-78ae-4829-9f2c-372a5ffee848	fishnet	remora	1.20729e-06	0.000356965	0.956592
0236b7a7-c35d-4695-8989-aab850802f31	fishnet	remora	7.20151e-07	0.000274893	0.982871
0236e316-262d-4b5c-ab56-b577364a9a5c	fishnet	remora	2.66044e-07	0.000199808	0.983222
0236ecf2-95b9-4ea7-882c-cc03e2a2951d	fishnet	remora	1.31982e-06	0.00082739	0.968434
02371366-65af-411b-bd8c-fa92ff52670b	fishnet	remora	4.22532e-07	0.000325911	0.989096
023760db-980b-47ba-b29a-f6ab55462bc9	fishnet	remora	1.33685e-06	0.000411434	0.970988
023761ea-f783-472c-ac82-4792f1952cea	fishnet	remora	4.05058e-07	0.000356264	0.988942
0237c1db-31d2-40cf-bc40-5c0dd721dde4	fishnet	remora	1.47645e-06	0.00154007	0.972425
023ae0eb-6e1f-41db-b63a-c9fd8a2cc0bb	fishnet	remora	6.21768e-07	0.000684324	0.968437
023ca8a3-a802-418b-a24d-15013fb32148	fishnet	remora	6.87451e-07	0.000429037	0.984607
023ce174-61f7-439f-a604-fac37230be86	fishnet	remora	7.60395e-07	0.000381282	0.974964
023d188b-6c6b-4e2e-8b61-072c00b4ab9b	fishnet	remora	4.92897e-07	0.000312067	0.985683
023dacda-e58c-4377-a195-2dd279f9ce15	fishnet	remora	5.93039e-07	0.00034923	0.969731
023dc4fd-18b6-4b8b-81af-4eac6236cbe4	fishnet	remora	1.35839e-06	0.000552138	0.956337
023e1a56-4d97-4996-af80-e0fa1dec341f	fishnet	remora	7.45991e-07	0.000394353	0.982571
023e5736-4c6c-4396-b911-e4097e4f6983	fishnet	remora	3.47585e-07	0.000160128	0.980318
023fc854-075a-4275-a109-740c1050f9fc	fishnet	remora	7.59873e-08	0.000217581	0.997048
02419a5b-535f-483f-b575-a0b23f381445	fishnet	remora	1.96829e-06	0.000730288	0.971957
024226d2-fbf9-47c1-a258-d23f790f5c88	fishnet	remora	5.91059e-07	0.000284243	0.974822
0242ab4d-f678-497c-be01-7211ae895e65	fishnet	remora	1.94763e-06	0.00055101	0.964961
0242b6a0-2eb5-4747-96eb-b1586665d055	fishnet	remora	1.35802e-06	0.000802197	0.971612
0243f9df-a904-46f5-b753-cdb714574ecc	fishnet	remora	7.06772e-07	0.000394633	0.97828
0244424c-875f-402f-809e-ab753fcaa30c	fishnet	remora	2.71386e-07	0.000170201	0.986646
0246899d-17f3-4f50-98ab-7ccd22dce614	fishnet	remora	8.4943e-07	0.000350281	0.961848
02472cb3-ee15-4469-9736-7d34e0dcac5d	fishnet	remora	6.84631e-07	0.000454539	0.986178
0247bd12-f649-4b08-a339-741dea470ec5	fishnet	remora	5.94232e-07	0.000437936	0.975486
02484455-e4e7-43e7-bf12-46567a8fbe8a	fishnet	remora	2.77481e-07	0.000247582	0.992496
02493c86-9b48-4a19-aa0f-c61ae80d2754	fishnet	remora	1.50441e-06	0.000924385	0.980597
02499204-18ef-4f60-b813-863a888810e0	fishnet	remora	1.34302e-06	0.000626613	0.968989
024d1ae7-7307-48f6-9cf6-aad21cf527db	fishnet	remora	1.64268e-06	0.000518456	0.957144
024d3cd2-90a5-42cd-a0e9-aa31c36e139a	fishnet	remora	3.22245e-07	0.000250527	0.987644
024efe21-a1ab-49b3-8a04-dd12a775eda9	fishnet	remora	1.31522e-06	0.000513905	0.976689
024fcd09-31bb-4980-946a-478c0cff35c5	fishnet	remora	4.35646e-07	0.000216877	0.981437
025054ff-7cc7-4505-aa0a-2c9313b79ab2	fishnet	remora	1.25777e-06	0.000408983	0.963585
0250ceb8-fec7-400e-bc10-815472ee7ab4	fishnet	remora	1.04054e-06	0.000531806	0.979511
025139e6-b7d3-44df-9ac1-73ffecd830f3	fishnet	remora	1.41614e-06	0.00450726	0.986414
025174ea-4b25-4cd9-9ce7-562c58b20953	fishnet	remora	9.24905e-07	0.000518229	0.977948
02523386-d9e3-407e-9aa7-ddc79ac9c731	fishnet	remora	1.27996e-06	0.000356117	0.948411
025349c6-cb9a-42a8-80c3-dc7ede97d873	fishnet	remora	1.93095e-06	0.000648084	0.949584
02551036-a741-43eb-82cc-e3ac4f9f2166	fishnet	remora	4.29917e-07	0.000281119	0.982198
0255e6ff-aa62-4cc2-a8be-4120af7313af	fishnet	remora	4.28836e-07	0.000257442	0.982185
025609c8-77fb-44dd-b614-bb6ebb06db4d	fishnet	remora	1.62966e-06	0.000535166	0.95501
0256a690-c1e2-4ed9-a145-ca5ae5abf2ac	fishnet	remora	1.16552e-06	0.000361226	0.955294
0256d266-863d-4642-b470-3075a918fd18	fishnet	remora	3.97615e-07	0.000249713	0.98007
0256fbff-cb91-4f45-b934-a1a28c9e370d	fishnet	remora	6.28903e-07	0.000227618	0.972732
025918fb-a87c-47cf-8a65-e554e809413a	fishnet	remora	1.34061e-06	0.00049768	0.959562
0259fb94-5f65-4eb0-a247-346fe7d47359	fishnet	remora	7.37519e-07	0.000555677	0.967167
025a1af4-d584-4c17-82f1-3373e1110a9f	fishnet	remora	1.60467e-06	0.000856187	0.955343
025aa371-2ba1-4567-ae71-bbd596bbd984	fishnet	remora	6.4533e-07	0.000414091	0.989762
025b8a9b-587b-4a49-b6eb-3facc04a071c	fishnet	remora	7.56403e-07	0.00233462	0.981015
025bad2b-ecce-4c5a-8a9c-e27837ffa30c	fishnet	remora	1.42513e-06	0.00060526	0.968942
025ca0b3-5263-44f5-8583-12461a9a1a2c	fishnet	remora	1.09662e-06	0.000505483	0.965224
025deef5-d1b5-408e-a5d5-5f0a1ad76eec	fishnet	remora	1.29445e-06	0.000585277	0.963362
025e0329-8618-4872-9885-d547f6a5f70e	fishnet	remora	2.61702e-06	0.000701843	0.951726
025e7a0d-762b-4e4c-9809-b9758314ccc7	fishnet	remora	5.38455e-07	0.000392422	0.983769
025f3e5e-3921-4ce8-99b4-519a63344242	fishnet	remora	6.4226e-07	0.000414611	0.983896
0260c517-5ab3-42e4-b054-f843431049c7	fishnet	remora	6.94165e-07	0.00037139	0.972363
02612d0c-bbf5-44f7-9219-6c937d09b2a5	fishnet	remora	1.75941e-06	0.000584001	0.96484
02618f3a-e5a8-4e82-b921-f961862602a4	fishnet	remora	1.05993e-06	0.000449731	0.961006
02630738-9872-4d84-ae48-42d06f216e39	fishnet	remora	6.18544e-06	0.0156005	0.973341
0265f939-b623-41ce-a56a-7feef5c89b5c	fishnet	remora	9.84706e-07	0.000467056	0.974948
02667b0b-59fd-4ddf-8d3c-ae963edecc78	fishnet	remora	7.6581e-07	0.000479588	0.968728
0266a669-a2d2-4a9c-86c6-8a9cfa41cb71	fishnet	remora	4.58129e-07	0.000154392	0.975038
02676c1f-c8a0-4ac2-85df-299cad56a4aa	fishnet	remora	7.33348e-07	0.000235418	0.974575
026770ce-57b6-4955-b7ac-222282daedd7	fishnet	remora	9.42795e-07	0.000442621	0.968144
0267dbf6-c78c-4c43-82db-913560835ec4	fishnet	remora	2.76621e-07	0.000197837	0.982954
026832f4-96fe-40f4-a56a-bb899a75ab6f	fishnet	remora	1.1769e-06	0.000377851	0.967119
026b7619-5a10-4aa6-b41e-0479ffd00bc5	fishnet	remora	8.53643e-07	0.000550992	0.968148
026b8e38-685a-4c67-b7f0-51caae07834e	fishnet	remora	9.05354e-07	0.000469652	0.983735
026c8975-19aa-40cd-af4f-ced93bb2070c	fishnet	remora	3.19852e-07	0.000178332	0.985956
026e1d15-ba58-4d50-bffd-4fdf733bb6ed	fishnet	remora	1.2664e-06	0.00156743	0.982164
026e3d20-3dff-4e35-8bcc-079667ffa3ae	fishnet	remora	5.87487e-07	0.000337774	0.975463
026f44c4-2740-4b96-aad9-90265bfb8729	fishnet	remora	3.09428e-07	0.000212491	0.98228
026f8eb7-9406-4136-ac9d-f555401c977f	fishnet	remora	4.45553e-07	0.000411914	0.989364
026ff9e9-7a9f-4f6e-ac5d-0c54bda091c2	fishnet	remora	6.96379e-07	0.000347604	0.973199
02702892-3902-4645-a161-34b65f500dc1	fishnet	remora	2.1057e-06	0.000891902	0.974433
0270e3b1-5652-4faf-b911-d10eb8303dd6	fishnet	remora	1.12046e-06	0.000854956	0.976796
027386f6-2f44-41e6-b4c3-d8e7c8dc41ca	fishnet	remora	5.7582e-07	0.000322659	0.982589
0275e0d3-bf03-407f-9495-ebbaaa17a624	fishnet	remora	4.84034e-07	0.000231811	0.982274
02762b4a-97d2-45f5-809e-7c3148abebd8	fishnet	remora	5.65539e-07	0.00112176	0.983661
0276397a-d835-411b-87b3-898ab8b2bd2a	fishnet	remora	7.56455e-07	0.000635074	0.973341
02797e2b-c6c0-4365-90c8-464561f0f064	fishnet	remora	1.34101e-06	0.00121527	0.96921
0279b094-9e93-408c-9398-a6ce29cf2bc5	fishnet	remora	6.69726e-07	0.000544036	0.980865
027a0fad-8934-4eeb-8f5d-035c34e91809	fishnet	remora	8.21134e-07	0.000271862	0.957363
027a3118-dd97-42df-a2ee-9d6ce48d0b8e	fishnet	remora	1.09931e-06	0.000818696	0.972744
027a6b71-a783-4389-a832-1f0aec7aa1ff	fishnet	remora	9.65324e-07	0.000294583	0.978782
027a8218-ea03-4038-ab71-cc729a6b1499	fishnet	remora	5.39411e-07	0.000214408	0.970289
027bf381-8ad1-47c7-a42e-1d4c787205ce	fishnet	remora	1.44562e-06	0.000628679	0.981996
027c89b9-b8d4-440d-bc31-75b9b85b5660	fishnet	remora	5.01156e-07	0.000442087	0.977944
027d42bf-9f95-469f-8786-c4770f62c3c6	fishnet	remora	1.50756e-06	0.000392141	0.946911
027d8a07-bb3c-487e-8734-8a7a117094d6	fishnet	remora	4.58355e-07	0.000225371	0.980334
027ea84b-c755-406e-8454-45aefcafec45	fishnet	remora	1.0032e-06	0.000434675	0.97494
027efc31-25d2-4fee-b4f5-8f6d4f14af8d	fishnet	remora	8.4898e-08	6.56001e-05	0.993735
027f12de-a4b4-4866-9ad8-0217738afa48	fishnet	remora	2.4236e-07	0.000177464	0.988728
027f646b-e6da-4d2b-80f4-1b36fdd770a2	fishnet	remora	1.20364e-06	0.000398309	0.955962
027f70f5-948a-49fc-bfb8-c162473c79e1	fishnet	remora	5.34889e-07	0.000458159	0.984868
028147d5-2659-4557-a076-8d700e8a467c	fishnet	remora	3.91898e-07	0.000266439	0.982464
0281757b-c689-4ccb-9c88-8f028e9c0dce	fishnet	remora	3.72204e-07	0.00041743	0.982705
02819200-2b36-4c57-9971-195d0788b67b	fishnet	remora	7.36577e-07	0.000473959	0.974285
028275b6-51b0-4ca0-8084-b51491b6c45f	fishnet	remora	3.81817e-07	0.000285617	0.983935
0282aa5e-28ee-413c-8443-aea8c732d496	fishnet	remora	6.2236e-07	0.00046446	0.983183
0282cc97-5f01-4cb0-91d5-1152cb56d87c	fishnet	remora	1.92585e-06	0.000731351	0.954414
028342eb-c32b-4e3c-9b34-1073d525ac64	fishnet	remora	1.17937e-06	0.000328903	0.974095
02835b1c-d805-4320-b0e6-89b20f89009a	fishnet	remora	7.80263e-07	0.000388687	0.975518
02843c2c-3409-4a80-a849-ce39cb2e8a15	fishnet	remora	6.51076e-07	0.00038853	0.989133
02849c84-372a-4c44-be8d-603c88c54846	fishnet	remora	1.36342e-06	0.00041705	0.973763
0284d29b-a414-4e08-aa59-83ee68963d6a	fishnet	remora	2.08946e-07	0.00016939	0.993822
02858be0-0a7e-42f2-bc1f-ad2ae879c005	fishnet	remora	7.04218e-07	0.00040599	0.964971
0285b35c-d487-43fd-aeda-8a8a96daa6f6	fishnet	remora	5.04429e-07	0.000305872	0.976439
0285cc4e-1fe3-4c07-b8d2-6d34e90e28c1	fishnet	remora	5.26614e-07	0.000358452	0.973521
02871013-8669-4cf7-b915-b08c2848a75c	fishnet	remora	1.06344e-06	0.000898543	0.982314
0287dc25-247c-4ec1-abc1-7787d11b5107	fishnet	remora	1.57297e-07	0.000239835	0.991237
028876e5-05bf-40d2-9414-bfffb89398bc	fishnet	remora	8.55718e-07	0.000436529	0.976844
0288eafa-b3f2-4cd7-8e9d-fb6eb055e74e	fishnet	remora	6.99913e-07	0.000392961	0.977259
0288f17e-14ed-422e-8252-a09d36bf8880	fishnet	remora	1.22262e-06	0.000520595	0.976158
028a1999-0da1-4f5c-bbde-b205f6068039	fishnet	remora	9.41399e-07	0.000293427	0.972069
028ae688-23ff-4eea-ade8-b03b9db4728c	fishnet	remora	8.07008e-07	0.00023494	0.9716
028af17f-3eea-4802-82ec-67135da3851f	fishnet	remora	6.54063e-07	0.000501754	0.979678
028b9689-db7f-44c0-be24-806159a4374d	fishnet	remora	6.28921e-07	0.000582173	0.979246
028be308-9b04-4b6f-af89-986da6f50d39	fishnet	remora	5.97128e-07	0.000361048	0.97704
028c2b48-2fc8-425d-a9e5-a553a1de00b2	fishnet	remora	2.25672e-07	0.000162666	0.988237
028cf1a9-18a3-46e4-8599-e241dd5130c7	fishnet	remora	1.9073e-06	0.000826359	0.955243
028e0706-89ff-4fc5-befe-d9f6f6c975ac	fishnet	remora	1.28409e-06	0.000362799	0.967138
028f572c-dde0-4ed6-b7df-b3699cd0112e	fishnet	remora	5.18694e-07	0.000288312	0.974945
028f75ee-755f-4d2c-bd1f-07e0aaf708e0	fishnet	remora	1.38419e-06	0.000502633	0.96015
0290301e-b49b-4586-ad62-0eabf52d3b50	fishnet	remora	4.20027e-07	0.000976975	0.984043
0292fa3f-4a82-4956-9829-df3c24ebe5a4	fishnet	remora	8.37262e-07	0.000527585	0.960509
0294ad27-b7de-425e-8a96-37ada379b1c3	fishnet	remora	8.51246e-07	0.000374985	0.981543
0294f72e-31d7-41a8-aefd-c706d244ac3d	fishnet	remora	4.93825e-07	0.000261151	0.974857
0295e182-7feb-432a-88c7-d6d2cf32069f	fishnet	remora	3.17394e-07	0.000368958	0.984516
0295ebbe-df15-4212-aa23-7eca3e9a2706	fishnet	remora	3.02079e-06	0.000404806	0.937445
0297712a-9a7f-4fa0-a8f3-7033c57e02dd	fishnet	remora	5.69356e-07	0.000332889	0.977798
0297cc18-baad-45aa-a81d-80abc8628c8d	fishnet	remora	3.90006e-07	0.000320643	0.979942
02988d8f-8d1b-427d-98f6-e3455ad3a131	fishnet	remora	3.6949e-07	0.000246816	0.980263
02991b16-5243-440d-9ff2-c6895f852481	fishnet	remora	1.41234e-06	0.000520291	0.954631
02995c2e-5bc2-427d-bf6c-112dfebf93bf	fishnet	remora	6.55499e-07	0.000452498	0.984816
029980fb-1093-43a0-8a2b-1923404d1a98	fishnet	remora	2.20419e-07	0.000240623	0.993313
029a9594-b1bd-4e16-a081-2171bbfdb809	fishnet	remora	1.05182e-06	0.000641053	0.973563
029b5bb9-65ef-496f-97d3-81fd0f779efc	fishnet	remora	3.99785e-07	0.000246548	0.982592
029b8fac-bbf3-479b-9107-e727e65dad74	fishnet	remora	5.29335e-07	0.000308627	0.984103
029e0e6f-6933-4aed-a5ee-1e00d73d214b	fishnet	remora	9.44344e-07	0.000603111	0.972714
029fc465-043c-4c91-93e8-3a2037d4cda1	fishnet	remora	1.45767e-06	0.000460118	0.964001
02a05dfd-6a63-48fa-872a-fc79d809ed63	fishnet	remora	7.41097e-07	0.000392017	0.974704
02a3a0c0-8fb8-4c6e-b49d-7d254a933ccf	fishnet	remora	3.16492e-07	0.000233772	0.987247
02a3b000-6262-4e93-bee7-5ac068df53c2	fishnet	remora	7.14961e-07	0.00108312	0.970118
02a416fd-a5a3-4233-a567-6d287918516f	fishnet	remora	1.31614e-06	0.000514371	0.968957
02a464e7-c729-4e73-967c-84afae7503c2	fishnet	remora	1.12196e-06	0.000440806	0.967106
02a6408f-92bc-4261-9a6d-1ea8dfd25a49	fishnet	remora	1.01592e-06	0.000449135	0.969363
02a68020-0a83-4c6a-86f0-3d8da580ae33	fishnet	remora	1.66043e-06	0.000416504	0.975924
02a6ced7-e21a-4945-a3c7-3e743f2f11f0	fishnet	remora	6.0825e-07	0.000396078	0.984159
02a73604-3cf5-478f-8402-f3d644b1486b	fishnet	remora	7.12242e-07	0.000426761	0.974622
02a7670d-23ff-4654-a753-b0e5020045cd	fishnet	remora	8.20766e-07	0.000327386	0.978242
02a86417-85fb-4563-bb3b-69a008b57516	fishnet	remora	1.00949e-06	0.000358992	0.976018
02a88a2c-5c0d-4fd0-90d4-a948b9134e5c	fishnet	remora	4.39358e-07	0.000386306	0.984524
02a94337-d423-4e21-961f-b4d409c44066	fishnet	remora	5.38697e-07	0.000375784	0.993044
02aa2b37-ef56-4302-9ebc-ce650ae47734	fishnet	remora	4.85313e-07	0.000382668	0.991719
02aa349b-4955-43dc-8236-577d749b0efa	fishnet	remora	1.15149e-06	0.000597323	0.963652
02aa4bc6-5703-4bfd-a92a-ea1cdb6be5fb	fishnet	remora	9.39791e-07	0.000316336	0.960245
02aaa27e-d043-4654-a6c8-499fe7451f19	fishnet	remora	3.91128e-07	0.00104103	0.988214
02acaed5-b1e6-454d-9ceb-835f0a64df67	fishnet	remora	3.83768e-07	0.000363032	0.989375
02ad4458-0600-48d8-8947-9e4503823953	fishnet	remora	7.40895e-07	0.000492152	0.989566
02ade40c-4ebc-4d9b-bca6-032fdb80e9ca	fishnet	remora	5.34169e-07	0.000315625	0.984515
02ae5f12-de1b-4820-bb7d-ec179162fbee	fishnet	remora	1.5452e-06	0.000756425	0.947345
02af4eea-c2ec-4ea9-bf0b-bd8c38ffec75	fishnet	remora	3.56182e-07	0.000386359	0.984259
02b1490a-4844-4c06-9fa9-ef24f04cd8fd	fishnet	remora	4.82974e-07	0.000396903	0.981751
02b1bed0-1e15-4007-9a51-55415e563fb6	fishnet	remora	4.03642e-07	0.000304179	0.974582
02b28791-1941-4148-a3f5-398099139f1f	fishnet	remora	7.94698e-07	0.000466412	0.975362
02b2e13a-2035-446a-8d4f-63f55f91fb1c	fishnet	remora	6.07078e-07	0.000481484	0.986652
02b3014a-84e4-427c-bad9-81e85a38dd75	fishnet	remora	9.82127e-07	0.000558563	0.974708
02b47475-08cf-4351-8449-906bb3bc1487	fishnet	remora	4.61215e-07	0.000248248	0.984756
02b47862-ee71-45cf-8de0-2785dfd61dcb	fishnet	remora	1.12119e-06	0.000578735	0.976939
02b4b402-c76c-48a8-bd05-269ac0ae6591	fishnet	remora	6.48906e-07	0.000296141	0.975779
02b612e4-7282-4384-92bd-b3a748bacaad	fishnet	remora	8.23829e-07	0.000962425	0.980872
02b632f5-a8c8-4417-94fb-e9ead005dae4	fishnet	remora	1.72638e-06	0.000689009	0.964887
02b65607-3881-4939-a690-e4985c6c3cb2	fishnet	remora	1.43382e-07	0.000166059	0.991631
02b6b3ee-07e5-4ecf-b18b-2cea0f97f539	fishnet	remora	7.26793e-07	0.000408578	0.985052
02b6b7e9-4786-4180-97ad-b5aaf89ac4ce	fishnet	remora	4.4781e-07	0.000765254	0.985929
02b71aa0-55f5-4210-89c3-c45d27b93cba	fishnet	remora	1.16561e-06	0.000830827	0.964135
02b74be0-0878-4b65-b9e3-f0b2ed378c14	fishnet	remora	3.51251e-07	0.000237811	0.980663
02b86ec9-c964-4698-b930-41747951a4ed	fishnet	remora	5.70217e-07	0.000250366	0.96915
02b8baf0-032b-4137-9644-236951a69682	fishnet	remora	8.78795e-07	0.000336954	0.962291
02b98537-392b-4472-82c4-b35f74fa6010	fishnet	remora	1.34993e-06	0.00047895	0.95629
02b9cd95-78c4-4791-a10a-3be4bff18510	fishnet	remora	1.27996e-07	0.0001969	0.996728
02b9ec23-f188-4889-9338-1db64fdb325b	fishnet	remora	7.70778e-07	0.000414691	0.977349
02bc3886-e805-4ebb-b1c9-e00ea648cc4c	fishnet	remora	3.13195e-07	0.000310898	0.987149
02bc76d8-11dc-4ee8-845a-a371c97cb180	fishnet	remora	4.6655e-07	0.000284478	0.982541
02bca5cb-4b2c-4f68-b382-40f062e35863	fishnet	remora	5.77463e-07	0.000355303	0.984591
02bce372-417f-4c57-b39e-a11790d3e648	fishnet	remora	6.82956e-07	0.000205498	0.977348
02bd0f56-bf0b-482a-a8c6-61b1a7b1a3b9	fishnet	remora	7.69937e-07	0.000610034	0.971293
02bd2c6a-6d6b-4555-865a-559f95eccca9	fishnet	remora	4.65997e-07	0.000199641	0.984508
02be45f7-25a6-4cbd-8100-a1dab6ff2ed1	fishnet	remora	5.76838e-07	0.000239096	0.976577
02be5a80-e870-4b23-9469-7b4c0fd0dacd	fishnet	remora	1.88557e-07	0.000154525	0.98731
02be69ae-81f8-43b5-8984-7fad0881daf3	fishnet	remora	1.90718e-07	0.000180754	0.990574
02be7bbf-302c-42fa-ac56-c8b73d57cbfa	fishnet	remora	7.02823e-07	0.00103169	0.975127
02beb02e-a88a-4d80-88a7-c5538d1a0ea7	fishnet	remora	4.01496e-07	0.000284972	0.9811
02bf1984-7679-4699-99f7-814eb41ef451	fishnet	remora	9.96414e-07	0.000498066	0.988155
02c08547-0c21-4f94-a871-d71b85e283a7	fishnet	remora	6.23524e-07	0.000404706	0.989812
02c0c8b9-18be-408e-8376-e3843bd0506f	fishnet	remora	2.14416e-06	0.000372463	0.945426
02c28857-2794-4836-b90c-c25f25dda414	fishnet	remora	4.15379e-07	0.000346356	0.990243
02c33681-2784-43c8-a43c-cc051ec4d5f8	fishnet	remora	9.6656e-07	0.000674094	0.971094
02c36ba7-d892-4cbe-9e4b-e1d4edf62ca9	fishnet	remora	4.24999e-07	0.000417557	0.984941
02c3ccc7-0a99-4ffd-8d17-09f58a7d35d5	fishnet	remora	4.19964e-07	0.000332459	0.97941
02c3e817-780b-4431-bf85-a7d8a2fbf985	fishnet	remora	3.78131e-07	0.000238695	0.990099
02c4a64f-3291-414f-b2bf-c346b600c170	fishnet	remora	3.63654e-07	0.000201784	0.981406
02c64161-d1fb-451e-b50f-1de35ee84fa8	fishnet	remora	3.52408e-07	0.000583175	0.985226
02c664e0-7529-458d-a0d6-5243e5ecd19c	fishnet	remora	8.07645e-07	0.000350486	0.969713
02c67b15-4ec1-4d0a-b985-a9e85a1b7c78	fishnet	remora	3.66142e-07	0.000255068	0.983604
02c794cd-fdd7-4bc0-a2bc-9989878bd037	fishnet	remora	9.68287e-07	0.000373905	0.966464
02c81a4b-355e-4255-b308-8ae817a778c8	fishnet	remora	4.49624e-07	0.000199174	0.978093
02c8c6e6-f29e-4f67-ba67-388adcec4dcb	fishnet	remora	8.33447e-07	0.000694152	0.980988
02c901be-fa43-45ec-97d6-5dadd5aa4eaf	fishnet	remora	4.97426e-07	0.000235244	0.974102
02c95555-aa34-4503-b094-ffe6d3690a7d	fishnet	remora	3.47728e-07	0.000285048	0.981495
02c9676f-2238-4fb8-b9df-ad565dc80161	fishnet	remora	4.28843e-07	0.000250086	0.984482
02c97b93-2076-4f7a-90c4-d58c856d8d3f	fishnet	remora	6.61369e-07	0.000443262	0.983566
02c9d2ae-4d95-424c-a9e5-a6028ce2d4ea	fishnet	remora	1.07822e-06	0.000362677	0.983176
02ca388f-3be8-46a5-ad47-262706a2bb36	fishnet	remora	2.16698e-06	0.000730237	0.972884
02ca7661-fa00-47e7-9c7a-815644c074a8	fishnet	remora	4.31204e-07	0.000185743	0.976064
02cb192f-e54d-4599-bc8a-bd2c928c25c9	fishnet	remora	4.58255e-07	0.000283582	0.972948
02cb7bdf-32af-4081-b23e-604f147c9706	fishnet	remora	6.89366e-07	0.000211121	0.965111
02cbac81-c6f7-4d42-b04c-a340bf7531c8	fishnet	remora	3.99588e-07	0.000410752	0.988366
02cc3f73-29a8-49f2-8001-36d9da5faeaa	fishnet	remora	5.22851e-07	0.000415678	0.978001
02cde6b7-805f-4752-922e-6b9a7075db27	fishnet	remora	5.94339e-07	0.000535119	0.982154
02ce1681-e185-477f-83ab-c18ee64a7c03	fishnet	remora	5.83534e-07	0.000340459	0.988198
02cf07b1-fdd0-4b6a-9dd8-bd4764542454	fishnet	remora	5.40418e-07	0.000242308	0.978334
02cf1c76-a699-4c01-9e31-19fe8cb00dbe	fishnet	remora	1.28377e-06	0.000541109	0.957171
02d051e1-d1ae-4879-aa02-7f1135c26601	fishnet	remora	4.86796e-07	0.000360291	0.986966
02d1377d-6fc1-4cf3-ac3f-088ee81d71a1	fishnet	remora	8.81335e-07	0.000226411	0.964274
02d1c6af-7f30-47f5-be03-9c3384b0e714	fishnet	remora	3.09696e-07	0.000353438	0.984847
02d30ae2-824a-41df-81f8-091337e46769	fishnet	remora	9.48631e-07	0.000446385	0.972478
02d35dae-cb81-4172-9ef1-f9a9ee07f15c	fishnet	remora	9.656e-07	0.000418906	0.963322
02d3f54a-7694-4f84-8437-2bdebbcc71e2	fishnet	remora	7.19152e-07	0.000343897	0.980569
02d47277-5ef1-4542-8077-29cd36778697	fishnet	remora	5.14517e-07	0.000235957	0.973085
02d549d8-b830-4e0d-9d36-33f87809e8ce	fishnet	remora	2.35635e-07	0.000234762	0.99012
02d73388-8f16-4170-8370-909f536ea568	fishnet	remora	1.02073e-06	0.000408554	0.970613
02d75bad-106d-41ab-a952-d83423ce731e	fishnet	remora	4.78644e-07	0.000187604	0.973189
02d75f29-a32d-4e76-9acf-01e7ccaf3848	fishnet	remora	4.93664e-07	0.000214091	0.98309
02d8564a-1136-4e96-94c7-c9c7031d652a	fishnet	remora	1.69172e-07	0.000118719	0.989256
02d8a043-a134-4825-b8fc-0cd97dbfe07e	fishnet	remora	2.06699e-07	0.000144652	0.9939
02d9e632-56cd-4bac-a7f0-fb044889dd36	fishnet	remora	9.68597e-07	0.00037625	0.963207
02da15e5-3255-4209-be24-370d97ace81c	fishnet	remora	1.30678e-06	0.000470834	0.962634
02da2950-0234-4eeb-bc26-2fa5a898929e	fishnet	remora	3.10259e-07	0.000182134	0.981895
02da6986-eae1-4337-af9d-1fd5706e5d9c	fishnet	remora	8.16539e-07	0.00032371	0.978538
02dae0e7-7fea-4f13-ba90-a7b6ab7bd01a	fishnet	remora	3.47007e-07	0.000308442	0.988593
02dc3c2c-da58-4f20-9b8e-131ab4fa6618	fishnet	remora	1.12002e-06	0.00100875	0.971406
02dcc8f2-b867-437e-9e9f-cd8ac9cec680	fishnet	remora	7.36868e-07	0.000633686	0.976497
02dddd27-5357-4414-81a9-ebe826a9130d	fishnet	remora	8.62444e-07	0.000635615	0.969891
02ddf709-a35c-4984-ac74-2c0a6d610b24	fishnet	remora	1.06557e-06	0.000458903	0.980512
02de631b-eb99-49d6-9a67-4e8b29891e9a	fishnet	remora	1.44525e-07	0.000177406	0.99243
02deacba-3f0e-4c73-88b9-3774415a17bc	fishnet	remora	5.29708e-07	0.000430454	0.985411
02ded0c2-5f5d-4ed3-ade4-0b127f6e7192	fishnet	remora	1.42061e-06	0.000638839	0.974095
02df0cae-0aec-4d77-988a-bb148c8ae701	fishnet	remora	6.60752e-07	0.000295177	0.981141
02dffa72-6895-4d84-91f4-beee21306471	fishnet	remora	2.56908e-07	0.000420454	0.993198
02e00bcb-e866-48b3-9825-6cba09487298	fishnet	remora	2.11656e-06	0.000659101	0.969498
02e02bab-2f79-4282-a83c-c1d0fc364ec1	fishnet	remora	4.094e-07	0.000278151	0.979231
02e11045-8f3a-4a11-b598-0a9994c472e0	fishnet	remora	7.32983e-07	0.000643056	0.97673
02e15348-56c0-4c1f-8806-1d7cc52cca92	fishnet	remora	3.10031e-07	0.00022243	0.985957
02e1c460-ec90-4110-b6dd-d0a6ab015a42	fishnet	remora	3.33017e-07	0.000408278	0.984144
02e1f8f7-a331-42bb-91a5-d5debf3a8b35	fishnet	remora	6.65654e-07	0.000311401	0.975474
02e2389d-f137-416f-b50e-4168c34ea467	fishnet	remora	7.69281e-07	0.000389425	0.968875
02e249ce-4a14-4ca4-94a1-197426cfa78b	fishnet	remora	1.37757e-06	0.000484294	0.954116
02e2f776-dd74-41d7-8cb4-0ed895280b74	fishnet	remora	2.56337e-07	0.000208153	0.993538
02e2fb55-a663-42b5-9b25-77382c77cbc9	fishnet	remora	8.29353e-07	0.000901331	0.97783
02e312d9-6c73-4499-869a-6af64b70b88b	fishnet	remora	7.51861e-07	0.00030804	0.979025
02e388ff-e3eb-4560-80b5-f274a242f071	fishnet	remora	3.89164e-07	0.000389441	0.98104
02e38df7-f59d-4702-8666-b1627778dfe3	fishnet	remora	1.55219e-06	0.00126494	0.97393
02e427e7-b27c-4be0-a987-e26a54e2d26b	fishnet	remora	4.04157e-07	0.000314641	0.982547
02e43932-4f3b-4b79-b4bb-238028e61efb	fishnet	remora	1.47725e-06	0.000889428	0.981776
02e47e5f-91af-4587-a372-8ef9aef9576f	fishnet	remora	8.87322e-07	0.000518092	0.977536
02e4c6fb-3923-4f4a-bab1-f611ad5ddcd9	fishnet	remora	6.40982e-07	0.000347711	0.970211
02e6c6d6-e080-4df5-8d23-d2ea10825ccf	fishnet	remora	6.13229e-07	0.000373395	0.983724
02e8b112-50f5-4e77-91ea-83badbe6ae7a	fishnet	remora	1.5126e-06	0.0011185	0.979739
02e904fd-2389-47ad-97d0-1ed685de3dc9	fishnet	remora	5.99204e-07	0.000423649	0.985224
02e94ee1-e77f-431f-a969-401422a36855	fishnet	remora	6.18696e-07	0.000211264	0.968173
02e981b0-3734-4752-bc31-ee26c2c6f7d1	fishnet	remora	4.72811e-07	0.00043366	0.989757
02e9d6e2-66e3-4dfc-a794-e3fb66a685cf	fishnet	remora	4.53347e-07	0.000207234	0.977149
02ea9adc-d695-4387-8d3a-beb4a0d53fa1	fishnet	remora	1.37711e-06	0.000910966	0.980108
02eae106-8803-44d5-8485-08a296ac5fc9	fishnet	remora	1.61852e-06	0.000678058	0.971631
02eb88f4-f220-453a-8cba-8bbd553add4f	fishnet	remora	6.66888e-07	0.000285302	0.975661
02eb8acb-ddb9-437e-b85c-ac4c94796154	fishnet	remora	6.58673e-07	0.000225126	0.966099
02eb9c7e-180c-4489-a488-378b91d4e645	fishnet	remora	8.51944e-07	0.000263887	0.970676
02ec605e-2b6e-4048-8986-5c7b104fa8be	fishnet	remora	2.13857e-06	0.000637857	0.975518
02ec985b-9deb-47c1-8582-e025e343961f	fishnet	remora	9.69621e-07	0.000267076	0.979552
02ee5b8d-186c-46a9-959a-0c178b33a6b8	fishnet	remora	4.19924e-07	0.000163616	0.974968
02ee9da3-1943-4a6f-93fb-7ba4d8609ba2	fishnet	remora	9.38175e-07	0.000369472	0.966847
02ef2a84-a3a2-4171-a715-353120f87cfc	fishnet	remora	6.76513e-07	0.000224238	0.977826
02f0c0a3-037d-4fbc-a169-5953854b34c1	fishnet	remora	5.52103e-07	0.000305454	0.97363
02f11ea7-f59a-449c-a4a2-3017f2f23bc1	fishnet	remora	1.27462e-06	0.000412525	0.964152
02f1663d-dbc3-4efe-b26c-46b675b572c3	fishnet	remora	5.73977e-07	0.000254218	0.976164
02f77453-51e4-4b0e-9600-82e2b5c9cd54	fishnet	remora	2.43341e-07	0.000142288	0.985634
02f799a0-6c63-42bc-ba4b-aa5a7c672c74	fishnet	remora	1.51724e-06	0.000445841	0.976499
02f91f0e-9a4c-41c6-8849-18bbed38f248	fishnet	remora	1.78884e-07	0.000440668	0.989747
02f92b25-f325-40eb-942f-a33d997874fb	fishnet	remora	4.54343e-06	0.0107531	0.966732
02f95ec4-c21e-45ea-9513-99d9d9aa32eb	fishnet	remora	5.87711e-07	0.000386469	0.967846
02f9da57-eafa-4a5c-8bfe-498560f3b73f	fishnet	remora	9.98512e-07	0.000378539	0.965695
02fa0eb2-b419-4594-b4fc-1d91edd59a54	fishnet	remora	5.92572e-07	0.000892691	0.988742
02fa1837-1d5b-44fa-898e-8e5bf98c576a	fishnet	remora	1.43599e-06	0.000957543	0.979023
02fac226-6178-49d2-a5c1-693804ac163e	fishnet	remora	7.10316e-07	0.000761246	0.967015
02fc22e3-9827-42ac-826e-00e2ef6bc5c7	fishnet	remora	1.17609e-06	0.000557633	0.974749
02fc81de-9cf1-4a8a-a8bc-4de5f8286005	fishnet	remora	7.58789e-07	0.000253577	0.969067
02fd16a1-40e9-4900-a8df-33ce4e8b856d	fishnet	remora	1.96606e-06	0.000725558	0.968654
02fd86b2-3938-49c4-983b-6716a05578dc	fishnet	remora	7.61998e-07	0.000376611	0.981658
02fe5559-a4fc-44c0-82e7-d84d8adda183	fishnet	remora	1.69947e-06	0.0030874	0.975433
02fe95b0-b4d5-4337-a1ce-aca042564a9c	fishnet	remora	9.48169e-07	0.000305629	0.966527
02fed0f9-23e1-4add-9dd8-3044351f348b	fishnet	remora	7.97064e-07	0.000921074	0.983705
02fff308-701d-44c1-9b2e-23be557189ed	fishnet	remora	8.12522e-07	0.000536233	0.979837
030015ee-15b1-4c76-86af-95446f7aee19	fishnet	remora	1.09142e-06	0.000424088	0.974599
030082d0-14b9-46ea-bf4b-de357962a2e3	fishnet	remora	7.31322e-07	0.000319823	0.975255
03017b30-d36a-4182-9980-e84a6f2a6b63	fishnet	remora	2.81741e-07	0.00042313	0.990145
0301b6c4-74e1-4b98-9ef7-c5d2002467f3	fishnet	remora	2.80719e-07	0.000176741	0.981891
0302d4d3-f1bf-4e4d-bee5-e754b9242e2e	fishnet	remora	7.99833e-07	0.000792257	0.975337
03037719-3fe5-4e59-9ab4-8dd8159c6eff	fishnet	remora	2.33461e-07	0.000528625	0.991334
03038222-072e-482e-9cc4-27deec00b2ab	fishnet	remora	1.10576e-06	0.000354783	0.96906
03038d0a-a69d-4dc0-bf65-dee109396e12	fishnet	remora	3.52981e-06	0.00437933	0.976025
030691e1-88b6-45b5-9560-2b8dabfc8bab	fishnet	remora	4.92012e-07	0.000316642	0.976759
0306d779-ec90-4361-a4f0-0460aaf0d9fd	fishnet	remora	4.1579e-07	0.00036075	0.978879
030723ae-f0c1-4a9c-a958-ba484669555c	fishnet	remora	1.63219e-06	0.000467187	0.971382
0307455d-fd7c-4da9-8f9c-c4362c96bd81	fishnet	remora	1.07889e-06	0.000487441	0.975794
03074569-7a28-4057-bf5e-8e57c1c263bb	fishnet	remora	1.03625e-06	0.000536526	0.980588
0307e1a8-6176-47f4-a689-bd40a945b5f3	fishnet	remora	1.11731e-06	0.000586147	0.970711
0308f489-58af-47f3-a468-9b490540a289	fishnet	remora	6.9061e-07	0.000377163	0.976626
03091467-74a9-4898-80fd-d31fcc6fe742	fishnet	remora	4.80681e-07	0.000224362	0.978415
0309cd3e-ca1b-4733-9616-49b994377505	fishnet	remora	3.57073e-07	0.000283017	0.990742
030a563f-42e7-476a-8194-313eaa16b42e	fishnet	remora	8.69701e-07	0.000353226	0.975007
030b3d94-3a02-4d90-b854-bd28cdb90e24	fishnet	remora	3.73276e-07	0.000291614	0.991401
030ccfd2-1561-45a0-b13b-a82790dd3d71	fishnet	remora	7.68964e-07	0.000477281	0.98489
030db6a9-bf75-4ede-a748-60a995d149ed	fishnet	remora	3.29207e-07	0.000185674	0.983368
030dbf45-6b4c-405e-b4e2-090fd6d85f47	fishnet	remora	9.78106e-07	0.000262261	0.965184
030e9c69-93f8-4510-acf7-9999e5a9b401	fishnet	remora	4.23684e-07	0.00026094	0.98718
030ff0d2-6f60-435d-8005-770be3f31df3	fishnet	remora	4.83743e-07	0.000361451	0.97624
031034d7-cf91-4aed-a9fa-e8cd6f42130c	fishnet	remora	1.36852e-06	0.000926589	0.973991
03104d0f-e02c-422f-bb21-11c77b289167	fishnet	remora	1.16649e-06	0.000529706	0.961764
03109ff3-323f-4ca7-afc1-a1bb5ecc8767	fishnet	remora	2.03926e-06	0.000556529	0.959097
0310d3c0-fa65-4205-9972-1ed9f5d3f32c	fishnet	remora	1.01725e-06	0.000334734	0.977356
0311ac15-e492-41d7-86a1-4c788acb0544	fishnet	remora	5.55383e-07	0.000499951	0.985784
0311aeca-98d0-4012-b1e4-112e79fda37a	fishnet	remora	4.25781e-07	0.000205737	0.987552
03120328-70bb-4373-83cb-15aa198304c8	fishnet	remora	7.60025e-07	0.000694683	0.968478
031221bb-8b89-4bcf-950a-0efee04f9fbd	fishnet	remora	4.75495e-07	0.000363309	0.986495
03126279-7de1-4781-9704-62206595a411	fishnet	remora	1.2505e-06	0.000495488	0.983437
0312d65c-46ca-4736-bba4-975becce92da	fishnet	remora	8.87169e-07	0.000337502	0.962351
0312e710-5328-4e35-9dce-e4a1e652db1e	fishnet	remora	1.38531e-07	0.000348534	0.995086
031394de-091d-48ed-b423-ade47e71401b	fishnet	remora	4.74824e-07	0.000357161	0.9842
03145108-b575-473d-9b6c-6b76d053cc12	fishnet	remora	9.53323e-07	0.000291098	0.967927
03152a45-8550-4d12-baa3-cbeb5497c5e1	fishnet	remora	3.5612e-07	0.00021954	0.982574
03157bca-df85-4491-82fa-7e11e002d88c	fishnet	remora	5.24451e-07	0.00049208	0.973338
031655e4-4ef2-4272-8b6e-b49772d6185f	fishnet	remora	5.48122e-07	0.000369644	0.987924
0317313d-4935-44f1-9c80-d36727a8d046	fishnet	remora	4.61752e-07	0.000230025	0.972683
03176c1d-728d-4acc-9d88-e00ccee44ec6	fishnet	remora	5.53685e-07	0.000346049	0.976466
03185d5d-3841-4e6b-9f23-80a68faa33f4	fishnet	remora	6.69799e-07	0.00059497	0.987166
031b2200-462e-497e-a92f-75deb83391a8	fishnet	remora	4.90566e-07	0.00030216	0.975504
031b3660-4704-4dcb-98b4-27dca4470184	fishnet	remora	6.80584e-07	0.000416942	0.981713
031c4814-a409-40cc-99b2-03a7b469d45e	fishnet	remora	6.02034e-07	0.000598821	0.966573
031d1b11-e500-483e-a998-1f800e7f1f47	fishnet	remora	1.56807e-07	0.000158516	0.99308
031da0fa-de20-4f1b-b191-bc47aff0ab9c	fishnet	remora	2.49789e-07	0.00020616	0.990061
031e0972-7974-469b-bbd2-b7bd6ec2b504	fishnet	remora	6.06337e-07	0.000289812	0.980691
031f1407-29cf-450f-86b7-259f876c1b7f	fishnet	remora	4.59615e-07	0.000360733	0.988453
031f2325-9ead-4e70-8a43-40d37453e237	fishnet	remora	5.63967e-07	0.000685796	0.984634
0320152d-96ab-447b-a22b-bf8529c24310	fishnet	remora	9.37014e-07	0.000440483	0.983786
03201cf9-a9fe-429e-ad3d-4c81113b69ac	fishnet	remora	3.69687e-07	0.000631929	0.983173
0320e30a-2e18-43dd-a8c6-7fd02e81e757	fishnet	remora	9.73206e-07	0.0004276	0.971061
03214cc2-d90e-4897-92db-6f6d4c958418	fishnet	remora	9.69588e-07	0.000523995	0.976151
032179cc-1c39-4c30-9ed9-8fc56de96e60	fishnet	remora	9.26463e-07	0.000326537	0.973561
03220861-89c3-473d-ab22-962e37068db3	fishnet	remora	1.19533e-06	0.000434471	0.966447
03233ba4-6e55-45e3-aa66-dfca1cdf1474	fishnet	remora	1.82683e-06	0.00028458	0.919409
0323803a-f581-41b9-b399-6fb0e9fe7441	fishnet	remora	9.649e-07	0.000703488	0.956574
032404ee-de35-423e-9363-6c7f8854832d	fishnet	remora	3.71871e-07	0.000428831	0.994279
03240ef5-92e9-482f-acba-4c7234898f93	fishnet	remora	8.02269e-07	0.000618309	0.984175
0324710c-9d09-430b-b63a-51d0219ebffd	fishnet	remora	7.76348e-07	0.000313328	0.962695
0324baca-4801-4eb0-a48c-513dd0b13165	fishnet	remora	5.67231e-07	0.000268839	0.974232
03251746-ee65-46f2-b7e3-1dcace40a780	fishnet	remora	5.23722e-07	0.000493961	0.973997
0326d4a1-4f1a-4ab4-8fa2-85da002446bf	fishnet	remora	6.66266e-07	0.000264034	0.972837
0327fed8-40b6-43d9-acf7-6d3854ff8be0	fishnet	remora	6.12969e-07	0.000470044	0.991853
032802ba-d4ea-48a7-aadf-43aab28a4b5e	fishnet	remora	8.98941e-07	0.000355393	0.986526
032896a1-3e2a-4eed-b16e-2bc6735b2a45	fishnet	remora	3.77551e-07	0.000289388	0.983824
0328d20b-65bc-4601-957b-c25e2101cd5b	fishnet	remora	3.37989e-07	0.000265414	0.989183
03290ce1-d2c9-4915-8dca-e24bac5635e2	fishnet	remora	4.78555e-07	0.000276968	0.976508
032a4542-f762-44a5-802a-e5b022554a87	fishnet	remora	3.44004e-07	0.00021024	0.985903
032a71bc-9e5f-471d-80f9-db7cc3064b08	fishnet	remora	2.61277e-06	0.000751303	0.960411
032aa142-6f7f-4791-ad3a-455cce6aba4d	fishnet	remora	1.57939e-06	0.000448465	0.975105
032adc36-3493-40d1-bacd-a92f1cb8006c	fishnet	remora	6.59475e-07	0.000332714	0.986573
032af7ff-0efe-491a-8da2-e48cc598646d	fishnet	remora	6.68303e-07	0.00052183	0.980169
032c6ab4-699e-4f9b-8be0-5d1b552bf5a7	fishnet	remora	1.21482e-06	0.000499221	0.952202
032d0ecb-2a41-43c0-85dd-e6f48f403115	fishnet	remora	2.04007e-07	0.000262442	0.99137
032d7da0-9326-4526-be8b-04e4ee35610c	fishnet	remora	7.70767e-07	0.000980917	0.978241
032e01a3-64a6-4579-bb24-f2b0ba6c89a8	fishnet	remora	6.00541e-07	0.000283704	0.97715
032e9073-c401-4671-96b8-9e08c7edd8de	fishnet	remora	9.53713e-07	0.000360339	0.963338
032fc9ed-69d4-4030-9167-10effc3d9365	fishnet	remora	5.91142e-07	0.000165986	0.96486
03308540-a36a-48f1-a396-78f46af34a1c	fishnet	remora	3.40032e-07	0.000411117	0.983354
0330cfde-6bc2-454b-b7df-21a08ee2861f	fishnet	remora	1.18805e-06	0.000447699	0.966514
033259a9-465f-40d9-92b9-97995e78c7aa	fishnet	remora	2.65359e-07	0.000268797	0.989857
03331f99-d3fc-44e9-9cde-39150ebbaaf1	fishnet	remora	7.63612e-07	0.000482371	0.981221
03332850-a36a-4e79-ba8e-f356cbacafd7	fishnet	remora	1.4153e-06	0.000473124	0.959155
033345a8-8ab9-4f0c-9eb0-6509164b1def	fishnet	remora	8.12744e-07	0.000333791	0.977388
033702eb-4f19-454b-8026-930f5814cbd7	fishnet	remora	1.05998e-06	0.000347652	0.981784
0337b90c-dff3-4b2a-878a-a6e7237cd858	fishnet	remora	5.19233e-07	0.0002746	0.970753
03382ba6-6f7b-4a4d-8201-117f2ad13ef0	fishnet	remora	1.94363e-06	0.000565204	0.964099
03388d17-38f9-4afb-b10b-0d3f73cf2daf	fishnet	remora	2.02674e-07	0.000190296	0.990931
03395333-ab8d-4674-8273-89c9333742eb	fishnet	remora	2.67902e-06	0.000579536	0.9509
03396fd0-b7fa-40e5-98a8-94c87c7a2a87	fishnet	remora	4.92165e-07	0.000288985	0.983616
03396fe4-b33b-421b-8692-8930a3abbeb6	fishnet	remora	7.44335e-07	0.00026568	0.982262
033ab54a-7775-4525-b8f8-43663bf221d2	fishnet	remora	1.05529e-07	0.000122038	0.993193
033b93de-304a-49bc-8172-83acc59e4c36	fishnet	remora	1.59665e-07	0.000225999	0.992796
033eb0b1-371e-45df-815c-6a8bb0a92ccf	fishnet	remora	5.2975e-07	0.000451306	0.9787
033ebc06-f80e-4dc5-a0e3-83e987a4c2fa	fishnet	remora	7.9137e-07	0.000479631	0.966282
034087fe-5ac1-4ad9-89aa-316529cd09f0	fishnet	remora	5.2815e-07	0.000308057	0.974887
0340f09d-7d2b-468f-85e8-baa7c85794f6	fishnet	remora	6.71036e-07	0.000371168	0.978879
0343b8e9-1553-4895-a840-3ee7fa5fc00a	fishnet	remora	2.10505e-06	0.000575437	0.963165
0344ad34-1b82-49cb-b243-cd2b4d729b43	fishnet	remora	1.53073e-07	0.000202611	0.992048
0346d569-d779-4cf6-813b-57e336c3d627	fishnet	remora	2.25539e-07	0.000235365	0.99198
0346dda0-7684-4330-81a8-383e8dd23cfc	fishnet	remora	2.88353e-06	0.000840975	0.949717
0346f627-860d-46ff-8305-2e054bad251a	fishnet	remora	5.30889e-07	0.000373312	0.979444
0347139c-252d-4476-b790-42c03209e33d	fishnet	remora	2.06059e-06	0.00319044	0.967347
034735f3-9052-4b14-aaf9-c7106822e84a	fishnet	remora	2.86664e-07	0.00017765	0.985698
03473ca7-9168-4309-97d5-07782464d66f	fishnet	remora	1.14202e-06	0.00206105	0.972219
0347ec72-45c9-417b-a3cd-06e0fd3f414e	fishnet	remora	3.73123e-07	0.000438942	0.989831
03480af0-39c7-449d-880d-817793e81204	fishnet	remora	4.26317e-07	0.000373574	0.992497
03483d22-5e3a-49dd-9319-c5fa40254949	fishnet	remora	1.50069e-06	0.000545335	0.97272
0349683e-1561-4a99-84d3-b1d565e8adf6	fishnet	remora	4.93291e-07	0.000424922	0.989653
034aec10-25a7-4aac-b0e3-52b33b37ae04	fishnet	remora	7.71464e-07	0.000263156	0.957144
034bcea1-a8a8-4f1b-a4dd-61a6132cbd6c	fishnet	remora	1.53451e-06	0.000437114	0.970288
034cbe46-5e1b-4008-8bd0-afbc4f87e18a	fishnet	remora	1.01744e-06	0.000664935	0.988547
034cdcc2-cb46-4f51-b2c2-f9b54f8cb22f	fishnet	remora	3.95963e-06	0.00106888	0.961406
034f5e9a-c4db-4c78-bff4-b5666fe50b7a	fishnet	remora	1.57203e-06	0.000716631	0.967322
0350b6e6-30c7-49b1-9099-731a9f676f18	fishnet	remora	1.05579e-06	0.00244922	0.962477
03514235-e28a-4078-9b17-bf393d35c5e0	fishnet	remora	5.9793e-07	0.000183022	0.972768
03517df6-45fc-4b85-834e-0d611adee423	fishnet	remora	8.98032e-07	0.000520383	0.991626
0351a5e9-5763-4352-9c8c-e07823789a6b	fishnet	remora	2.50204e-06	0.000462154	0.961515
0351bac7-ab04-4bd0-a138-4859e7a19061	fishnet	remora	1.1848e-06	0.000424605	0.972811
0351f8ab-91c5-4503-8945-c823088bb388	fishnet	remora	4.41106e-07	0.000272331	0.987152
03525bff-4e97-41b8-98a1-3315aab940e0	fishnet	remora	1.10918e-06	0.000885902	0.982466
0352645e-4df5-4433-a231-f0cd7fcdd244	fishnet	remora	4.36788e-07	0.000164889	0.977208
0352e842-fb86-4224-af6c-4525199c637e	fishnet	remora	2.31029e-07	0.000400458	0.989347
0355d47e-7308-4b7c-9472-76471cb4b9cb	fishnet	remora	1.2197e-06	0.000511247	0.981542
0358cfb0-f02e-44c8-8d64-1bcaa6f54c0e	fishnet	remora	1.01722e-06	0.00044933	0.971008
035906d2-ceea-40ad-ab9e-76d0ed8ec0b2	fishnet	remora	1.34949e-06	0.000560834	0.972566
035a1ed7-65c0-4fb2-9ad6-2403aa55f281	fishnet	remora	8.22312e-07	0.000308218	0.975783
035a4b3d-686f-4f1b-ada3-a8abdaf6e07b	fishnet	remora	7.39428e-07	0.000473562	0.967394
035bbc26-8c1f-4b82-b7ae-1c76793e95ff	fishnet	remora	1.17585e-07	0.00016295	0.993064
035d960c-c286-4f34-8f23-b755daffa2ed	fishnet	remora	1.51539e-06	0.000399223	0.955561
035db69f-d3dc-465a-b0d9-c2016803748f	fishnet	remora	1.09433e-06	0.00127474	0.987409
035e2281-6f70-46f8-a913-70e573dc8a76	fishnet	remora	1.0263e-06	0.000883922	0.976701
035f5afe-ba6e-4388-8dac-07d4735d4811	fishnet	remora	5.93617e-07	0.000489836	0.98155
036044ce-0d38-421c-aabc-fe06a1071bd8	fishnet	remora	4.03441e-07	0.000153352	0.976387
036050aa-2f27-4357-8e1b-1a1a0eb61354	fishnet	remora	1.20908e-06	0.000671531	0.978037
03619c85-ba57-432f-85ac-5fbcff74a76f	fishnet	remora	6.04614e-07	0.000344457	0.977935
0362eeb1-0051-450b-a9cc-b87c93a68691	fishnet	remora	5.4892e-07	0.000365949	0.983333
03633287-95b8-4162-8861-aee86d183d6c	fishnet	remora	2.9066e-07	0.000201474	0.982903
036395d7-93e3-48d5-8f5a-8f65b7ed88d5	fishnet	remora	2.90975e-07	0.000197975	0.994132
036410e3-189d-4413-9116-21109e01b150	fishnet	remora	2.69997e-07	0.000593938	0.990748
036563f5-316f-402f-a9eb-b124c214bbc2	fishnet	remora	1.12439e-06	0.000410609	0.967551
03664f75-8a13-4cc7-89bc-15ed53b75bd6	fishnet	remora	4.40615e-07	0.000374595	0.978388
03665079-b110-4262-b2e7-20f76b133a26	fishnet	remora	3.26632e-07	0.000191341	0.984391
0366d246-dbc2-4b2b-8e2b-9a4eb44a3907	fishnet	remora	1.02583e-06	0.000722709	0.976514
03675719-c1ed-4097-be66-7bddcfe9e50f	fishnet	remora	7.6642e-07	0.00039456	0.985806
0367f96e-7453-46cd-9584-289b88df14ad	fishnet	remora	6.88837e-07	0.000406091	0.976609
0368256b-486d-4705-a48f-0f833d4308aa	fishnet	remora	5.79495e-07	0.00028675	0.970433
0368c3f5-1d8a-48ed-b34f-5517e542f4e6	fishnet	remora	1.49758e-06	0.000718587	0.972656
0368df7e-a668-48ae-bc7e-3d48fd6e28be	fishnet	remora	4.90417e-07	0.000429221	0.987201
0369b670-f9f0-4f06-8af2-f2de2d7999fe	fishnet	remora	3.24503e-07	0.000307264	0.988291
036a5ed2-d6d8-4212-a3dd-5f8976f7332f	fishnet	remora	1.05812e-06	0.000330233	0.961372
036b5f85-e8fd-4df1-881c-8db63be8a0c5	fishnet	remora	1.16312e-06	0.000559032	0.957937
036b6b06-2340-4cb7-8808-87c271b52bbb	fishnet	remora	7.83924e-07	0.00134355	0.965367
036b7731-6c17-4061-a301-89715f7c044b	fishnet	remora	7.45071e-07	0.000521383	0.974416
036b79fa-dfdb-4bc0-89bd-518fefd4a4e8	fishnet	remora	4.93838e-07	0.000260389	0.983384
036cbb0e-3184-4907-be14-4f622a1ad9e0	fishnet	remora	7.4798e-07	0.00148425	0.968368
036d50be-1495-4561-969e-1f8d6cff55f9	fishnet	remora	3.36291e-07	0.00018843	0.984021
036e7a2d-df24-4293-af16-3a63204127b5	fishnet	remora	4.82183e-07	0.000267146	0.985552
036f5bf4-fba7-4f2e-8da9-1cd1f4637fa1	fishnet	remora	9.71152e-07	0.000643811	0.981458
036f6205-08f3-4804-a426-ed4d2e780e11	fishnet	remora	5.41749e-07	0.000384588	0.979636
036f6378-afc7-4f82-a144-8bc2b7c4f420	fishnet	remora	1.42259e-06	0.00085563	0.975142
0370c5ba-1f6b-4c6a-bf6f-6dcea0056377	fishnet	remora	5.47236e-07	0.00027453	0.984136
0372e7ce-efba-4418-b0e8-b55a09577f97	fishnet	remora	1.78573e-07	0.000326473	0.98712
03739e8d-03da-4b28-8a62-c9c0f2c16f2c	fishnet	remora	1.34422e-06	0.000482538	0.973018
03740471-ad55-4f4f-9a46-8628bbc96efc	fishnet	remora	3.49271e-07	0.000290728	0.98919
0374a157-23d1-44e2-9ce4-a685596c0a06	fishnet	remora	8.59893e-07	0.000556164	0.975029
0377cf26-79e0-4be4-834f-af2dfe827742	fishnet	remora	1.00376e-06	0.000394232	0.958961
03785bd4-f2e0-43b4-bc0b-cc890328787d	fishnet	remora	1.72032e-06	0.00162858	0.985156
037a372a-d47c-4e96-87a8-860b3579248a	fishnet	remora	6.52392e-07	0.000383271	0.967472
037a62d0-5498-4b77-800c-1bf16b55f289	fishnet	remora	1.81604e-07	0.000308792	0.992511
037aa0b9-bfdd-42c4-b934-10eccaeb7041	fishnet	remora	4.20436e-07	0.00026081	0.98257
037add20-2a6e-4e50-8e02-4602a0086b3b	fishnet	remora	9.0824e-07	0.000413155	0.979148
037b36d4-0d25-443f-acf1-c9c64bd76744	fishnet	remora	3.96131e-07	0.000178089	0.976233
037c2398-2cf9-4b2a-b96e-cf064e7b2aa8	fishnet	remora	3.58441e-07	0.000316236	0.985869
037da124-7c9a-4048-9d0e-4088e919b577	fishnet	remora	1.45378e-06	0.000424899	0.960586
037da56f-397c-4224-8789-fe452e7df183	fishnet	remora	4.90584e-07	0.000425811	0.977843
037e1be0-5e18-478e-a3bc-4327c9adf1a5	fishnet	remora	1.28723e-06	0.000323465	0.948371
037e8d67-ca29-447d-9f0d-547f6402b241	fishnet	remora	5.95369e-07	0.000402779	0.974632
037fb769-1bb2-4285-bc1e-1a3815bc37b7	fishnet	remora	5.20559e-07	0.000296161	0.97822
037fc171-23ad-4c51-9a80-2e3ddf90544c	fishnet	remora	8.21017e-07	0.000428272	0.959054
0380499a-42e9-47e3-9df8-8dc32e7929aa	fishnet	remora	3.90284e-07	0.000326509	0.984823
0380dc07-f169-4851-ba00-acd8ade2ef57	fishnet	remora	7.89243e-07	0.000293755	0.960143
03814c83-5054-468a-8ba0-dd6a09bc6711	fishnet	remora	3.61976e-06	0.000895957	0.947613
03815e0c-d246-4e96-ab3a-9963a6405f03	fishnet	remora	1.0341e-06	0.00266232	0.973772
03823d4b-c578-480e-a4bd-54ab915e1082	fishnet	remora	3.86508e-07	0.000218675	0.977011
0382e4c1-eb50-47e5-b61b-155b74113dff	fishnet	remora	4.89519e-07	0.000643708	0.990724
03833f85-8eda-45dd-914a-48d29f78ca52	fishnet	remora	1.77576e-06	0.000500429	0.956046
0383b6b6-9393-46d2-b2cc-bea9f085af06	fishnet	remora	4.47257e-07	0.000208444	0.975178
0383c786-922d-4685-a00f-6850f020d802	fishnet	remora	3.97632e-07	0.000222939	0.989667
0383f4c2-c19b-4495-a2c1-22993aba681d	fishnet	remora	7.97058e-07	0.000426608	0.987746
03846a4e-6d04-42cf-9ef7-344c1c29ad95	fishnet	remora	1.43602e-06	0.000432949	0.956224
0384f2ed-4abd-4ecb-9dfb-3aa8715e0805	fishnet	remora	1.6748e-06	0.000762508	0.974723
0387fd8f-ae18-4bf4-beb7-430dfb1bf71d	fishnet	remora	3.62995e-07	0.000296936	0.9846
03883d03-68de-4fc1-b710-d947b88122b8	fishnet	remora	8.46327e-08	0.000158878	0.996011
03896407-2f32-48e2-b7b9-faf79f78d9fb	fishnet	remora	3.47444e-07	0.000495895	0.989955
03899c1f-e180-4fda-8f6e-7d4acdf72161	fishnet	remora	1.04376e-06	0.000482207	0.974776
038c679a-0054-4882-8bc2-cec562a88290	fishnet	remora	2.36893e-07	0.000180755	0.99205
038c9f72-3582-435b-ba89-49ec104e5682	fishnet	remora	8.33965e-07	0.000763423	0.98777
038d8447-536c-460d-b5dd-b0f3a14d5fad	fishnet	remora	8.52898e-07	0.000343689	0.979228
038ecb2d-d3e8-44b3-9bf7-2cd41a35a3be	fishnet	remora	5.87757e-07	0.000384131	0.985314
03909ccb-898b-407b-9238-b95c89f553c6	fishnet	remora	2.09229e-07	0.00021821	0.992009
0390a12e-558b-42c5-8fb9-4910468472e8	fishnet	remora	4.83457e-07	0.000386565	0.984983
0390e243-3490-4d08-91d7-8490158fdbe6	fishnet	remora	5.78066e-07	0.000282354	0.968872
0390f96e-81ab-42cb-97b9-66ce289eefce	fishnet	remora	1.46114e-06	0.000695776	0.98288
03910219-8f04-4858-96c3-f5c8f3d62eaa	fishnet	remora	5.16836e-07	0.000444444	0.978733
0391361b-0de7-42be-9179-cf1a241dbd91	fishnet	remora	1.33765e-06	0.00293168	0.978332
039188d0-905b-4e9b-b722-9221058ff2ed	fishnet	remora	1.307e-06	0.000378697	0.951689
03918b0e-570a-4f4a-81ed-d6a1736709c7	fishnet	remora	1.87125e-07	0.000132161	0.992131
03928213-e768-4382-8a9f-11ed3d0160f6	fishnet	remora	5.41202e-06	0.00454774	0.956128
03930bd5-3f6e-49dc-8a56-4c9b04119661	fishnet	remora	2.00136e-07	0.000197238	0.993924
039375c8-2056-4dbb-8286-4a3b1302d170	fishnet	remora	4.36986e-07	0.000180581	0.982298
03943d54-d7f2-48e5-8139-a83c546034f2	fishnet	remora	9.69714e-07	0.000817544	0.979054
03951a17-9ae9-4797-a118-20aade5729c3	fishnet	remora	6.18735e-07	0.00118449	0.982404
0396cacb-df71-4517-aa8b-36f59eec73de	fishnet	remora	5.92327e-07	0.000236577	0.965596
0397b069-c088-410f-a94d-f8c10cb52d87	fishnet	remora	6.8029e-07	0.000329855	0.969595
0397e988-9abd-4a60-b74b-6e2446ffe839	fishnet	remora	8.85665e-07	0.000845369	0.960873
0398a3ae-a9ae-482b-bf85-9186962bbe55	fishnet	remora	4.17226e-07	0.000191884	0.982962
0398c73e-b8d3-4f5c-bad2-9268e84955fa	fishnet	remora	3.04175e-07	0.000539858	0.986266
039a3535-49f5-45ec-a84d-4efdf0fb5414	fishnet	remora	6.54821e-07	0.00114908	0.976289
039ad8f7-f2a3-48f2-81d1-b48502fbe68a	fishnet	remora	3.06666e-06	0.000726874	0.964437
039b5c80-4d60-46f8-8c86-2f1f4fbfe03c	fishnet	remora	4.99408e-07	0.000243404	0.976022
039b7610-8b9c-4aac-a509-32fa4a6849a8	fishnet	remora	2.66348e-07	0.00030749	0.995219
039c0604-55f4-4689-96a0-78fcafca8615	fishnet	remora	4.83454e-07	0.000378086	0.986967
039c8ecf-0d9f-4d42-911c-c97b98e93eca	fishnet	remora	5.47764e-07	0.000752596	0.982492
039cc062-ce7b-4ad6-99a4-70d2ac30e796	fishnet	remora	3.47733e-07	0.000200999	0.976866
039ccb9e-4933-4f70-b8ab-1cd1a7f9b355	fishnet	remora	2.50109e-07	0.00111574	0.991768
039d0b52-d3f8-40e3-be57-39b827610a06	fishnet	remora	2.7138e-07	0.000177854	0.993227
039d1103-6632-4c26-8aed-00fd2abb8bfb	fishnet	remora	4.8167e-07	0.000212661	0.976323
039e0229-a5db-4378-a6ba-d016308f014c	fishnet	remora	2.45025e-07	0.000202893	0.985275
039e339f-373c-48e9-9785-680ef2f732db	fishnet	remora	0	0	1
039edb16-3dd1-4fcb-a9e7-6d010557ab03	fishnet	remora	5.16382e-07	0.000366913	0.984948
03a185f8-d0fa-40ef-8c9b-984f83efaf7c	fishnet	remora	5.87802e-07	0.000492256	0.978047
03a1b13c-0a5d-4298-b674-624dc9fba727	fishnet	remora	8.21226e-07	0.000360373	0.975542
03a280be-841a-4e61-8f42-9d3754dc2d9d	fishnet	remora	9.37874e-07	0.000423131	0.966638
03a2e0bc-d5eb-4f19-a12b-99457af67cfc	fishnet	remora	4.04961e-06	0.00145952	0.93025
03a30519-2eec-4059-8356-8de72e825d89	fishnet	remora	2.57044e-06	0.000678451	0.970378
03a36fad-1ff5-4aef-9bab-6b4a32e0cbd0	fishnet	remora	1.02302e-06	0.00117698	0.961896
03a3f713-2c1b-4d15-b0be-eb9aef557198	fishnet	remora	4.5288e-07	0.000248681	0.981086
03a42bec-35f8-4364-9881-d07e29d78695	fishnet	remora	1.73194e-06	0.0006942	0.974604
03a43237-5f8c-4c8d-ab10-1815b47965f2	fishnet	remora	4.02477e-07	0.00116788	0.982925
03a47465-a73a-4b5d-816b-40f4e2fcd218	fishnet	remora	1.29294e-07	0.000221631	0.994735
03a4e2cb-39e8-4aa3-b675-42311daad091	fishnet	remora	3.43279e-07	0.000349003	0.987755
03a50fa6-089d-44cf-961f-fe738e3a8fc7	fishnet	remora	6.04089e-07	0.000396431	0.973878
03a56f60-fdf2-4db6-87c5-3926da2c6538	fishnet	remora	7.96224e-07	0.000229266	0.968344
03a57a01-48e7-4904-99d2-18b8ff98b217	fishnet	remora	4.3689e-07	0.000598086	0.987362
03a57f4e-e214-4aa7-851f-806c411bfa22	fishnet	remora	1.81898e-06	0.00108444	0.968861
03a69e69-0042-4323-b301-e1ca09b92db6	fishnet	remora	7.80011e-07	0.000441961	0.97895
03a6db6e-150d-47cb-87a0-1e79880030e4	fishnet	remora	5.21246e-07	0.000194548	0.982757
03a7d7a0-dd34-43d5-a55c-0f3d22f757e2	fishnet	remora	5.62658e-07	0.000219453	0.975935
03a9c2e4-f33c-4dc3-b8f8-78030ec4145c	fishnet	remora	3.60108e-07	0.000195942	0.991535
03aa13c3-2777-41b1-8993-7b472a7c94ff	fishnet	remora	4.64249e-07	0.000226368	0.978482
03aa94e4-2135-4a5b-bfd6-edcfece29ea2	fishnet	remora	6.64215e-07	0.000390959	0.979393
03aaf2cb-b5e3-4521-9ed0-e1f90ba3a202	fishnet	remora	8.51089e-07	0.000421444	0.985151
03ab3e57-8421-432a-8ce6-3d47630d52dc	fishnet	remora	6.32967e-07	0.000343843	0.98562
03abfeae-3641-4942-891f-884a4b0a189d	fishnet	remora	2.54103e-07	0.000215042	0.991363
03ac20e0-0c4b-4475-8d2c-c384ec615409	fishnet	remora	6.08709e-07	0.000317873	0.985374
03adc1fa-4c8e-4397-a409-fd798ab96912	fishnet	remora	5.96959e-07	0.000730352	0.967602
03aeabf4-fa0a-498c-a2b1-8941ad3d8b49	fishnet	remora	1.96354e-07	0.000147055	0.990665
03b0fcc6-79bf-49fc-9a70-7ace47fc4afe	fishnet	remora	4.69331e-07	0.00038966	0.984524
03b10aa9-ff42-4406-bd2a-43959642a28d	fishnet	remora	9.00305e-07	0.000312718	0.979149
03b19fc7-bbb3-4301-8cd5-254ad2416b97	fishnet	remora	1.64409e-06	0.00175957	0.963057
03b1ae8a-1093-4915-a8df-8a7e191b30a3	fishnet	remora	1.29982e-06	0.000411486	0.958783
03b1ba2b-1f5e-4a19-922e-e7bfbb73e386	fishnet	remora	9.45265e-07	0.00033485	0.969929
03b2b33c-a264-45ba-aeca-708bd7b6a649	fishnet	remora	1.34453e-06	0.000578142	0.967131
03b2dd23-4e09-4b48-bd55-0b43d790911a	fishnet	remora	2.74736e-07	0.000251004	0.991145
03b378fa-3997-43bf-a247-510a19b8988a	fishnet	remora	9.7278e-07	0.00031211	0.964065
03b43e08-7dc8-40d7-8f26-f9eb07a04404	fishnet	remora	3.27213e-06	0.000717244	0.926608
03b6460c-ef17-4e75-afbb-423a1903659a	fishnet	remora	1.08025e-06	0.000798337	0.969996
03b6862a-f2a7-4ae2-99d5-729409d357be	fishnet	remora	1.70313e-06	0.000451649	0.965241
03b6bb39-27c1-41d0-b620-8b3dc906738f	fishnet	remora	1.91123e-06	0.000962666	0.95473
03b75505-aba8-4617-8eef-1fe8723774cb	fishnet	remora	1.8696e-06	0.00108696	0.97367
03b80246-26e7-4e37-a4ec-9ad80d6fca0d	fishnet	remora	9.334e-07	0.000382732	0.965127
03b8a9d7-cfab-4a5a-aa8a-dea6e62f4263	fishnet	remora	2.5014e-06	0.00567468	0.957797
03b91724-cd4b-4c13-8a6b-6b4b0ede72d3	fishnet	remora	1.09401e-06	0.000608164	0.967251
03ba0d14-5f75-4e81-80bc-dd138d1fb2ac	fishnet	remora	6.87962e-07	0.00141213	0.982148
03ba2685-3811-4886-9349-ab2a2230ba88	fishnet	remora	1.00795e-06	0.00116175	0.986059
03bafef1-05a1-4717-869f-23beb1e156c7	fishnet	remora	5.24374e-07	0.000359339	0.98174
03bbf6ba-c350-45d9-aaaf-9f29cc2df0ba	fishnet	remora	5.81182e-06	0.000911262	0.940598
03bd3167-feea-4c8c-b0fd-948b16094eac	fishnet	remora	5.97939e-07	0.000474676	0.982378
03bdba06-eb7e-43d6-bf8f-c074258115f3	fishnet	remora	3.35301e-07	0.000296286	0.991226
03bdf9f3-bcee-40e0-84d9-f8ee9feed201	fishnet	remora	9.74039e-07	0.000322644	0.961856
03bef49a-4c8b-4f55-954f-4203e63b0ca2	fishnet	remora	3.26314e-07	0.0002556	0.983593
03bf4df8-ebd6-4fa5-966c-51f6b4552139	fishnet	remora	9.39944e-07	0.000354194	0.975277
03c00fb7-ce80-493c-ba34-0f412a2c608b	fishnet	remora	3.64216e-07	0.000163709	0.981006
03c38eb9-ec1b-40e1-aab0-b2c25d29538e	fishnet	remora	1.47831e-06	0.00053902	0.979286
03c49147-3517-4bac-9d6d-6c56818f331b	fishnet	remora	1.12164e-06	0.000563998	0.976395
03c5a390-88b8-4091-b91c-900910152829	fishnet	remora	5.64808e-07	0.000198756	0.97279
03c607e0-ad6a-4f57-8960-d3692ccfa5df	fishnet	remora	1.15237e-06	0.000324087	0.967978
03c70c97-9439-4b0c-bd81-e8abbd0f1541	fishnet	remora	1.31449e-07	0.000148055	0.993524
03c7582b-4155-4d5e-88f2-6cfcd05893d6	fishnet	remora	7.89046e-07	0.000449092	0.970718
03c75cbd-b6ca-42fb-abc6-822de28bba03	fishnet	remora	6.65841e-07	0.000555713	0.989581
03c791d6-b2dc-4a94-9020-ad87266fc935	fishnet	remora	2.01823e-06	0.000732263	0.962337
03c97052-85a6-4b80-b838-a89c0173e133	fishnet	remora	9.07635e-07	0.000458981	0.97116
03c9b4e7-ef03-4d9a-87d6-dde1fee51c5a	fishnet	remora	7.08337e-07	0.000445385	0.988121
03ca2121-de83-465c-8045-2b6e9c8eff1d	fishnet	remora	6.07457e-07	0.000480729	0.990209
03cab89b-6d1b-4167-b5bb-46de604f6ee0	fishnet	remora	7.32648e-07	0.000450263	0.972119
03cc3132-e49b-4ed5-bd30-e329769d061a	fishnet	remora	7.92453e-07	0.000279018	0.966057
03cc46a0-3b85-4096-8044-01f5b5dad6ab	fishnet	remora	3.90437e-07	0.00023371	0.983125
03cccca8-0cd1-4bc0-8e91-91e72cc93aae	fishnet	remora	1.16396e-07	0.000215409	0.996598
03ce272f-3b1e-4b95-bea7-3422793c62e5	fishnet	remora	6.29218e-07	0.000421361	0.979842
03ceca39-fecd-4bea-94fa-dc931e79363c	fishnet	remora	1.44496e-06	0.000736414	0.958864
03ced564-f94a-4dc0-8cd0-f57d384a9cb4	fishnet	remora	6.47881e-07	0.000334881	0.977159
03cf2c9a-9906-40f8-afe2-799013846a24	fishnet	remora	4.41793e-07	0.000275604	0.989739
03cf57df-c9ea-4bb6-ac26-cf496153bbf8	fishnet	remora	9.68782e-07	0.001166	0.964228
03d074dc-c43b-4687-a3a4-2c91417177ec	fishnet	remora	1.83712e-07	0.000143716	0.99112
03d0c47d-7b83-42af-8be2-c265573e1b3d	fishnet	remora	2.68658e-07	0.000234812	0.994458
03d17948-aa1c-4076-a681-a6b0fe2f201a	fishnet	remora	4.91144e-07	0.00040742	0.978081
03d32942-40c4-4284-b283-2606d99e2f91	fishnet	remora	9.51331e-07	0.000292499	0.969898
03d464a5-4322-4c3e-b6f8-0074b4ac2705	fishnet	remora	1.10782e-06	0.000639456	0.953931
03d49744-7868-41e3-b8a2-ce0b6f720519	fishnet	remora	9.93176e-07	0.00062781	0.978146
03d4c550-fdab-4755-aa99-ecfd468a8899	fishnet	remora	3.14573e-06	0.000635786	0.898247
03d5eded-8612-464a-aca0-0206d2a910ed	fishnet	remora	5.63267e-07	0.000220588	0.979165
03d6409c-33ed-4c84-bd38-347a3b82ddb4	fishnet	remora	1.80645e-06	0.000636485	0.962535
03d75db7-8365-4c17-b979-253402d79e8b	fishnet	remora	9.50554e-07	0.000383623	0.977467
03d8dccd-a45a-4049-91b3-7e51f563b965	fishnet	remora	6.39391e-07	0.000400582	0.977375
03d9cf40-aecb-444a-aacd-a1110c98dee7	fishnet	remora	1.24683e-06	0.000412358	0.967487
03daacd4-f02e-4610-bb3d-191b3fee4966	fishnet	remora	4.04903e-07	0.000248874	0.975778
03dabe5e-f99d-4bec-951c-89059167b9e2	fishnet	remora	9.11515e-07	0.000333026	0.971172
03dbd834-bd86-4e89-8924-cf288adeb733	fishnet	remora	5.33573e-07	0.000339893	0.979255
03df11c2-0fef-4f8d-bd7e-589570c89595	fishnet	remora	7.37707e-07	0.000534586	0.977864
03e00290-545e-424f-9219-520dad118f20	fishnet	remora	5.46688e-07	0.000304254	0.98592
03e0d3cd-62f9-48dd-8455-7f4915c84c24	fishnet	remora	1.10164e-06	0.00139063	0.958584
03e40c44-b8b8-4de4-8403-6c6891125cff	fishnet	remora	1.49915e-06	0.000531215	0.966711
03e444a9-ed36-434a-b03c-2ff7fad10b58	fishnet	remora	6.72906e-07	0.000386927	0.988265
03e551bd-4854-4f78-b5c7-a8739d70a54d	fishnet	remora	7.86966e-07	0.000426464	0.981716
03e5797e-1066-47c9-b1eb-5ab4aca986c2	fishnet	remora	1.03775e-06	0.000634377	0.965468
03e63548-acca-4252-b009-ecb63ffd6e31	fishnet	remora	1.46149e-06	0.000421346	0.970552
03e71d1b-b3a8-4af6-a30a-0077416fdab5	fishnet	remora	3.10645e-07	0.000215244	0.981766
03e8997d-8109-4959-b15b-dc05cd9eae1e	fishnet	remora	1.3031e-06	0.00041318	0.961863
03e9de96-04ab-4e8b-9271-a30e3f0b461d	fishnet	remora	1.39787e-06	0.00127935	0.973892
03ea1805-3cdd-4311-bf9c-735514c6afbf	fishnet	remora	1.7205e-06	0.000440957	0.946457
03ea8bc0-5c88-4322-ac42-c27fc69073e6	fishnet	remora	1.19562e-06	0.000839222	0.961987
03ebff6a-ad7c-4f6b-a247-dfbfeaf32324	fishnet	remora	6.23218e-07	0.000564172	0.980423
03ee0e0d-f4ad-4946-9f98-98f6240e0a37	fishnet	remora	1.19168e-06	0.000544198	0.971765
03ee3d29-21a1-4133-81d0-52e97c57b128	fishnet	remora	3.40181e-07	0.000279559	0.981921
03ef09d4-ba61-4561-8f1f-ce4b66d7b929	fishnet	remora	1.501e-06	0.00102279	0.965008
03effdac-4d52-497c-8b70-62d842373908	fishnet	remora	3.05406e-07	0.000361194	0.990135
03effdfe-c0b1-46a6-9196-cfd3e679928f	fishnet	remora	9.13746e-07	0.000282213	0.972819
03f0bd57-723b-44cc-bdf3-65a36e928312	fishnet	remora	6.17879e-07	0.000377855	0.978836
03f119ff-b7da-45e0-8a6a-6b99bd3e08fe	fishnet	remora	1.47649e-06	0.000518999	0.971712
03f13ba3-0390-4cb7-9195-816ad7e174d5	fishnet	remora	4.70803e-06	0.000923337	0.93001
03f1820e-c6d6-41cb-b93a-2a269997fd49	fishnet	remora	1.37006e-06	0.000504618	0.957544
03f1f78a-fa29-4ea5-b63d-05d04360ab9a	fishnet	remora	1.94072e-07	0.000136004	0.99156
03f33ca1-ee72-4efa-9882-7ab68b3836e7	fishnet	remora	7.05233e-07	0.000218482	0.983449
03f3ce66-8186-4be6-8fdb-d2905a22b864	fishnet	remora	5.70707e-07	0.000304218	0.966697
03f485a2-d07f-4ec1-9193-34f53c3d8d84	fishnet	remora	2.94346e-06	0.0060017	0.968635
03f4bc8d-0b12-4fb2-81b9-9ebf3bdc9bb9	fishnet	remora	3.03792e-07	0.000164667	0.988095
03f50d96-7f5f-4915-9c53-40c24c593abc	fishnet	remora	1.04092e-06	0.00109099	0.953629
03f58f0a-2c29-4b94-b284-39489a666ff0	fishnet	remora	1.01744e-06	0.000317369	0.964355
03f5a34e-ec7d-43d8-8f22-2ebedc79575f	fishnet	remora	1.18112e-06	0.000604558	0.979415
03f68107-9723-4f59-96ef-6454f6facfe4	fishnet	remora	4.67034e-07	0.000245612	0.984013
03f7b29f-ca16-4087-ae71-9e8bb5388093	fishnet	remora	6.61004e-07	0.000232358	0.963546
03f8e4a7-7bc0-4a3f-bfc9-c5d82476793a	fishnet	remora	6.12137e-07	0.000250449	0.97996
03f93199-5eee-4d4d-b173-d7c6e6fd4460	fishnet	remora	4.74721e-07	0.000414179	0.982604
03f95b3b-382b-4fe1-b94e-691a3f18d1c2	fishnet	remora	1.41672e-06	0.000352619	0.962864
03faa271-2a4c-4f9a-9675-6138b42a1fdd	fishnet	remora	4.78402e-07	0.000227521	0.976213
03fb16c0-49c4-4785-a384-1b4dbed049b0	fishnet	remora	9.10255e-07	0.000486139	0.976024
03fb5671-6db1-4aa2-b738-390c5cbc13bb	fishnet	remora	7.77582e-07	0.000406991	0.977507
03fc6981-df6e-4697-bf6f-2724d0e6f55e	fishnet	remora	9.57115e-07	0.000278812	0.959289
03fc7737-8dcc-4979-b3e2-9858ab3cb377	fishnet	remora	5.53082e-07	0.000446979	0.975225
03fd77a2-6afa-4969-8017-52988bef48a4	fishnet	remora	7.2203e-07	0.000359172	0.97578
03fdcc94-7aff-4d31-a557-0f4dfab66b39	fishnet	remora	3.2678e-07	0.00034519	0.988785
03fdd01c-4c33-473f-9d05-20ce048cd9e7	fishnet	remora	6.57897e-07	0.000402299	0.985683
03fdf919-8296-4e8c-a62d-b6f8a022ae4d	fishnet	remora	1.27399e-06	0.000439247	0.97592
03fe3b4b-a0d3-4390-a669-b084ed209853	fishnet	remora	1.77918e-06	0.000481355	0.947128
03ff0d92-9525-4987-b280-40d29fba00be	fishnet	remora	1.11434e-07	0.000287185	0.992269
03ff29d3-da7c-4790-8dbf-226e586e62a3	fishnet	remora	1.20034e-06	0.000364178	0.944632
03ff3b16-992e-4f04-aefc-3c3caab4a625	fishnet	remora	4.15109e-07	0.000203639	0.980878
03ff3fe4-fc09-4f1c-a91f-96d041491552	fishnet	remora	6.31094e-07	0.000679942	0.982208
03ffd505-02f6-4806-839e-1703c560e55d	fishnet	remora	1.22312e-06	0.000342818	0.965323
03ffdf76-a866-4558-9545-8a0a7de1f8c3	fishnet	remora	3.9224e-07	0.000293326	0.981625
040019fb-8165-46b9-9c52-f316d0e2e3ba	fishnet	remora	2.51172e-07	0.000225658	0.987762
0400b7b5-fa9e-45a8-9b83-b8d0e9d48df5	fishnet	remora	6.66633e-07	0.000609779	0.983769
0400d21b-3ad3-4407-91f4-e94346303d64	fishnet	remora	3.64877e-07	0.000182186	0.981256
04013a51-c5f2-46fe-a8fa-81029deb183d	fishnet	remora	1.49465e-07	0.000192012	0.991262
0401548b-f155-41fe-9c5d-1ddd84a8e213	fishnet	remora	1.68067e-07	0.000221686	0.993554
0402df09-a249-4cfe-a1cc-89d3dec2b89f	fishnet	remora	2.48693e-06	0.000794274	0.961962
04035aca-5da0-4b38-b88e-e7d88663fe39	fishnet	remora	1.13388e-06	0.000605741	0.974775
040608bc-48d4-4a32-8533-e92a029ce774	fishnet	remora	3.88164e-07	0.000591787	0.989952
04066f77-31f5-4f8f-a453-fd7d17fc67ed	fishnet	remora	1.52705e-06	0.000514119	0.938625
0406f35c-c3d6-4f6f-9215-c1d7d2dc0a14	fishnet	remora	3.63705e-06	0.00151513	0.940437
04082dc7-c9ea-40db-b85b-b280424f9cdc	fishnet	remora	8.14028e-07	0.000356177	0.968574
04098fdb-a070-45b7-884a-de904587da7a	fishnet	remora	4.78591e-07	0.000284337	0.985976
040bd780-445c-4d0c-b8db-c89d7588ed87	fishnet	remora	8.20806e-07	0.00125924	0.979095
040d4ec3-404f-4477-a3e0-bf67129f85d6	fishnet	remora	4.92015e-06	0.00174246	0.960564
040e0683-bd61-493a-8ff2-24c4970f20e4	fishnet	remora	4.29098e-07	0.000262205	0.978866
040e0a2d-9cd4-45c8-812a-bd8845d2843d	fishnet	remora	6.82669e-07	0.000397273	0.969866
040e3ab8-b411-42f5-9693-cd51ac5c5e49	fishnet	remora	7.50303e-07	0.000324374	0.983301
040e6a10-3f71-4897-a467-4e008be6c229	fishnet	remora	2.04545e-06	0.000486288	0.947566
040f167f-a4bb-4b5c-b32a-ec64a54b744c	fishnet	remora	9.55131e-07	0.000541595	0.970182
040f625f-cbe7-4d4f-a57b-cc689a02a23b	fishnet	remora	9.10607e-07	0.000433091	0.97402
040f6ad6-e864-4631-960f-dc22528e0d6a	fishnet	remora	1.60933e-06	0.000320842	0.940511
041048da-4695-4580-80cc-e5e44d81cda7	fishnet	remora	2.74454e-07	0.000212553	0.988715
04112c81-9d15-4223-9005-779bd1b8bead	fishnet	remora	1.2521e-06	0.000501575	0.9637
0412109e-9aa7-4ff2-a646-52a502c3f4ac	fishnet	remora	1.49549e-06	0.000686853	0.963903
0412993d-9192-4953-a2d5-9756faf9aa64	fishnet	remora	5.12565e-07	0.000252632	0.979823
0413946e-9c4f-4417-a3a8-0327155965e8	fishnet	remora	2.41087e-07	0.000244868	0.988902
0413a169-1259-4cb8-ac0e-9219f7e9914b	fishnet	remora	6.19144e-07	0.000270416	0.970913
0414d68b-d3f9-4527-9b6b-6acae8fa68da	fishnet	remora	1.09976e-06	0.000352301	0.964209
0415139f-470b-4c60-94bd-bcc1c0cce1d4	fishnet	remora	1.24855e-06	0.00383256	0.960403
04158c6d-552f-4413-b05b-fd7b0916901a	fishnet	remora	2.92568e-07	0.000162088	0.986012
04161e8a-7d36-47cf-85e3-ed9d4d5e69d2	fishnet	remora	1.53999e-06	0.000519253	0.965818
0417a356-f0b2-4bf4-bb9e-fb9bcdcc9964	fishnet	remora	1.3487e-06	0.00224344	0.973038
0418268d-3cb0-42df-a389-8f248301a333	fishnet	remora	8.78616e-07	0.000436069	0.978685
0418c15c-86b9-484c-933f-36b4d76eac81	fishnet	remora	5.29191e-07	0.000325045	0.983098
041930db-4658-4268-a26b-a000fa1723d9	fishnet	remora	7.71821e-07	0.000438544	0.976474
04193735-c893-4e50-a212-9303ca5de919	fishnet	remora	1.54697e-06	0.000748775	0.968846
04195901-5527-4b76-97d2-2b2fc72f2fe5	fishnet	remora	7.52614e-07	0.000322399	0.960366
0419ab53-aaf6-4f9b-8dab-7cf3b61b2b34	fishnet	remora	2.40504e-07	0.000407948	0.986039
041aba8f-9cc1-4df4-b9a5-dbef081379b7	fishnet	remora	2.96271e-07	0.000230624	0.983935
041b681c-c2c4-4091-97a4-d341339147ca	fishnet	remora	1.16987e-06	0.000930028	0.967811
041ba957-0c3b-4cf6-a843-096cee4ac53d	fishnet	remora	2.60413e-06	0.00060562	0.954398
041c7c6b-1672-40ba-9b54-a373d62899db	fishnet	remora	1.03657e-06	0.000299911	0.955219
041ce5c9-822c-440d-a237-9dfbd6934501	fishnet	remora	2.91342e-07	0.000304948	0.991096
041f1dd3-b48f-4360-b08d-d560b1c04750	fishnet	remora	4.41673e-07	0.000274466	0.989374
041fc647-d8e2-4f6f-a07c-3336715a1cd3	fishnet	remora	1.26922e-06	0.000432732	0.958026
041fd042-f4db-4158-a412-6820f1f640c3	fishnet	remora	1.18795e-06	0.000324339	0.975865
04200c14-dfac-4b37-a8bc-edb9dd6bde08	fishnet	remora	3.805e-07	0.000386624	0.982335
04211310-dbc2-484a-b4d9-3969fae931ea	fishnet	remora	1.09139e-06	0.000440136	0.98078
042137a6-004e-472b-bba0-51cef678c6a8	fishnet	remora	3.15823e-07	0.000823336	0.992957
04219c4e-4462-4f7f-b658-8f00b07f31dc	fishnet	remora	1.91444e-07	0.000128999	0.991132
0421b6c8-c427-404c-8a71-8541bbdaf767	fishnet	remora	1.07086e-06	0.000675075	0.95908
0421fbb9-da24-48d7-86df-08a7574535aa	fishnet	remora	1.28811e-06	0.000568432	0.966321
0422a6c1-8a7d-4faa-a1f9-f334c4fe76c6	fishnet	remora	6.34523e-07	0.000218571	0.974081
0423366b-784f-4e86-aa32-8e5bb71202c6	fishnet	remora	1.1241e-06	0.000791722	0.982426
0423df5b-0ba0-4ec4-a508-e083f0fe4461	fishnet	remora	1.05235e-06	0.00111755	0.976154
04240453-4d0b-4c10-a4ab-5772c91812f3	fishnet	remora	8.49521e-07	0.000438596	0.973929
04242c3c-0500-41b2-9d1f-09cd92a87699	fishnet	remora	1.07077e-06	0.00182956	0.975215
04253049-43c4-4814-a147-5b5ef79406b8	fishnet	remora	2.75993e-07	0.000187393	0.985896
04269c29-b59f-47f1-b42b-d5c599fbf2da	fishnet	remora	7.31173e-07	0.000438987	0.98217
04275465-94a0-4b4e-8d19-ee66b2fe840c	fishnet	remora	7.65446e-07	0.000553153	0.962094
0427c470-5350-4ddc-8dc3-bfb4805004ea	fishnet	remora	2.23218e-07	0.000203374	0.986301
0428ef18-82f2-4008-9e4d-2f8eb482b681	fishnet	remora	1.72133e-07	0.000331589	0.994344
0429ec3d-8b59-4de4-86c9-9d287e7208de	fishnet	remora	8.86089e-07	0.00055451	0.962005
042a1c9a-03aa-4583-b163-d6c85366dff4	fishnet	remora	1.17999e-07	0.000152398	0.994413
042a7e05-a4e2-4584-a2d2-1f599b5276b9	fishnet	remora	5.43474e-07	0.000421301	0.983341
042a876e-e924-4a8d-bba7-9b96bab80d40	fishnet	remora	1.87219e-06	0.000408417	0.9498
042a8f49-6f76-4372-b928-8de840e509a0	fishnet	remora	5.03131e-07	0.000269078	0.989174
042acdfe-8782-45b9-a800-cea81a01603a	fishnet	remora	4.35928e-07	0.000360499	0.983666
042b5e74-26a5-47b1-be2f-b847b6834ad5	fishnet	remora	9.04658e-07	0.00103268	0.976206
042bb387-9745-486d-a55d-6c0b24272747	fishnet	remora	1.22342e-06	0.00121442	0.980115
042bfe02-19d6-45ff-831a-d3949cbd17c8	fishnet	remora	1.01805e-06	0.000849057	0.978899
042d28de-8cb5-497b-a9c4-8aabbbbeecff	fishnet	remora	5.44065e-07	0.000310818	0.975577
042d33a9-22e7-4a5d-83ed-a0887a4ea169	fishnet	remora	1.49285e-06	0.000515657	0.966691
042e1fff-7185-4c68-a568-12f8e6c305f1	fishnet	remora	4.42453e-07	0.000341198	0.984713
042e838b-7339-41ba-9d91-abd6b4757670	fishnet	remora	1.32502e-06	0.0004713	0.959191
042ea194-14a6-4640-905f-a6107298a725	fishnet	remora	1.78166e-06	0.000900944	0.970818
042ee507-68ac-4828-8d2b-b84e91574a30	fishnet	remora	3.29739e-06	0.000669118	0.950104
042f3f97-a20c-4b69-adff-834a108a3075	fishnet	remora	5.1517e-07	0.000682566	0.98887
043010f5-db40-4de7-8435-00337ee78cd2	fishnet	remora	7.49843e-07	0.000351107	0.976589
0431021d-30c9-4fad-a269-1dfa3819c028	fishnet	remora	7.78228e-07	0.00073594	0.972516
04310800-a353-44b8-a1fb-70e2ee95b933	fishnet	remora	1.81897e-07	0.000209828	0.990694
0432c724-c48a-48f6-bdc2-cad6367dfbd8	fishnet	remora	6.66184e-07	0.000359494	0.967034
0433a86f-2d63-4215-a2cd-596a9f10f858	fishnet	remora	4.99551e-07	0.000464102	0.978808
04344831-65df-45f3-b823-353491480178	fishnet	remora	6.26364e-07	0.000239321	0.967542
043579d3-659c-4131-844c-6569b0c09979	fishnet	remora	6.9135e-07	0.000306648	0.98024
043641b3-0ff7-4a89-bb15-d2d3d99d7578	fishnet	remora	1.49406e-06	0.00053836	0.957526
0436c78f-5071-40a5-a01f-c85fd7dd67f8	fishnet	remora	5.24222e-07	0.000279109	0.982244
0436f4a8-b902-48a9-94ca-c895f377c23d	fishnet	remora	5.02252e-07	0.000293238	0.972176
0437d86a-049d-4b66-9a77-961b166faa97	fishnet	remora	1.00433e-06	0.000410155	0.956193
043822b1-a29b-4dd4-b704-9a5160b3a118	fishnet	remora	6.16022e-07	0.000278545	0.980124
04384b6e-51d7-431e-9361-94d22c0087fe	fishnet	remora	1.74204e-07	0.000193906	0.992193
04389d7e-76fe-40ee-88af-e7e5faaba65e	fishnet	remora	5.08476e-07	0.000360054	0.985971
0438a82a-3729-447e-b4a2-b65109509e33	fishnet	remora	9.55173e-07	0.000458356	0.975485
0438e1f9-4d4b-4db9-bb12-9c7c3475e8f8	fishnet	remora	7.62235e-07	0.000369668	0.980669
043aeb0c-a5d3-431e-aef4-b5ceb457a063	fishnet	remora	1.37591e-06	0.000882531	0.963138
043c75c3-f572-4bff-8c25-8381b6a92acd	fishnet	remora	1.49461e-06	0.00145893	0.965439
043cc745-e729-48ec-9087-340a4c2e81ed	fishnet	remora	1.00348e-06	0.000383039	0.963594
043d4e90-fe80-49ad-bf8a-00e792ecc9b5	fishnet	remora	2.93244e-07	0.00024125	0.987402
043d9eb7-527e-4a61-9fb1-40945107a299	fishnet	remora	1.55649e-06	0.000396141	0.938788
04406565-35ae-4e73-8fc3-4d167cc18c2f	fishnet	remora	4.7765e-07	0.000529155	0.98402
0441587d-c05a-4c60-8298-98ffa431430a	fishnet	remora	6.7404e-07	0.000392448	0.983278
04422859-3907-4fa1-a78f-3d02464ee595	fishnet	remora	4.55767e-07	0.000445672	0.991256
044250c7-a622-4dc5-99c8-7edd2af9bd3b	fishnet	remora	4.67641e-07	0.000595587	0.99163
0443914c-8d71-4646-82bc-a81de9127d97	fishnet	remora	1.54678e-06	0.00109192	0.962771
0444a6d0-f8d5-4e92-953d-a23d9e74b6a4	fishnet	remora	6.42467e-07	0.000304887	0.982751
044578d5-c09d-469a-8b63-db01ff1153c0	fishnet	remora	1.92683e-06	0.000715551	0.951202
0447320d-3234-4290-bebe-c38db387b0c2	fishnet	remora	3.9356e-07	0.000250338	0.982331
04476698-b5fe-478e-b0e8-602cf8438f8b	fishnet	remora	6.96324e-07	0.000999981	0.991764
04478596-a96d-4920-af5f-656db32a4fb9	fishnet	remora	1.22334e-06	0.000888626	0.970308
0447ac01-f4c7-487b-8957-3c05bb5f2ae2	fishnet	remora	7.26265e-07	0.00035461	0.966713
0447ccea-1031-4eb8-9c02-f92c2d560395	fishnet	remora	4.50505e-07	0.000358754	0.984137
0448fca6-763f-4b9d-a563-5f24b81ebf62	fishnet	remora	4.60692e-07	0.000259148	0.9872
0449cf5a-8465-4327-b5aa-cb33f1d401ad	fishnet	remora	1.48347e-06	0.00183038	0.960381
044a2f99-083b-4700-b009-fc9f1c63bbf7	fishnet	remora	9.24269e-07	0.000905277	0.990216
044aa1f2-cfd7-46f9-9ab7-d91883182be3	fishnet	remora	9.04135e-07	0.000622867	0.972948
044af6f3-b8c8-437f-b8ab-4012155edc99	fishnet	remora	4.37163e-07	0.00026809	0.987444
044b1523-0505-468b-80c5-091c9b482056	fishnet	remora	4.14326e-07	0.000352929	0.98993
044f569a-f67d-4c1f-b32f-48a573c7c814	fishnet	remora	9.54832e-07	0.000780706	0.972782
044fbeee-1515-487c-a4e7-c197096cb599	fishnet	remora	6.09042e-07	0.000901921	0.973679
044fdeb7-7fc3-4b7e-aa38-a97911a4dafc	fishnet	remora	1.89499e-07	0.00034297	0.991036
044fe2e1-217e-41f6-99d9-e99109cabbb9	fishnet	remora	9.78821e-07	0.00044588	0.971686
04502a02-42d2-49ff-b7f7-67315d13cef1	fishnet	remora	8.34494e-07	0.000658979	0.98822
04509335-36a9-43f9-8f5b-7d969a99d8b2	fishnet	remora	1.67956e-06	0.000895756	0.965607
0450da04-a54c-4908-a2bb-5d8893b984e8	fishnet	remora	4.58036e-07	0.000233231	0.988238
0451f9ed-9478-4dbf-88e1-820ddf0a2e67	fishnet	remora	1.41121e-06	0.000693244	0.965378
045285b6-1a10-4d02-a486-37b9d7d06e10	fishnet	remora	5.43455e-07	0.000450821	0.989183
04536a55-7ed3-40d1-9a5b-d4f21cbb6571	fishnet	remora	1.16688e-06	0.0008055	0.964997
045378c5-17ac-4cf0-8bc3-d4b769c7fc71	fishnet	remora	5.44357e-07	0.000450701	0.973682
0453ea48-8dca-4ce8-9cd4-77d4ef22a656	fishnet	remora	1.0646e-06	0.00141003	0.979567
0453ffb7-43e1-45f1-8367-93815bc09583	fishnet	remora	3.1957e-07	0.000232783	0.988235
0454e211-0735-4d7f-9ca0-ce69afc13232	fishnet	remora	2.18029e-06	0.000663532	0.923284
04552fae-c76b-471c-9204-8df89675d46c	fishnet	remora	6.35083e-07	0.000331725	0.979439
0457c8b8-db26-4cf6-933d-d9e57101592d	fishnet	remora	1.07435e-06	0.000357327	0.969199
045867e3-9483-49aa-8668-d7d9705071ab	fishnet	remora	7.29419e-07	0.000356432	0.972631
0458bd7d-f83b-46d0-b3e9-bc1f9a0ff565	fishnet	remora	4.95721e-07	0.000449401	0.987359
0458c6af-db65-415a-b6c0-ae34405a30f6	fishnet	remora	5.9138e-07	0.000277039	0.982456
04591179-3c60-4258-883b-23969f3668e5	fishnet	remora	1.21472e-06	0.000569167	0.958443
04597daa-9e37-4941-b1cd-5ac6b1b13d4b	fishnet	remora	1.47475e-06	0.00102922	0.955967
04598a6d-b75c-491e-9aee-fb9a3e0be36b	fishnet	remora	1.26035e-06	0.000483141	0.957791
0459dfa8-bebf-4e24-a35c-172b4b4ec361	fishnet	remora	4.26267e-07	0.000334129	0.986993
045ba238-bb1f-41df-84c0-4c8e5e0f7ba7	fishnet	remora	8.70727e-07	0.00034432	0.980589
045c4719-6691-4c1e-8c0d-fed9171d0086	fishnet	remora	6.93508e-07	0.000328995	0.98324
045ce846-39a9-4592-9135-6a7ffff4b062	fishnet	remora	3.70522e-07	0.000222707	0.978572
045ebf00-93be-451d-850e-daabc772534e	fishnet	remora	3.77106e-07	0.000220891	0.978444
0460c806-c8f5-4d6f-9da3-a0abf5333f54	fishnet	remora	1.28525e-06	0.000631286	0.960386
046137ea-0d1f-4000-8739-4eed292724de	fishnet	remora	1.97244e-06	0.00102361	0.976446
04616f84-041e-4fcc-aa33-a9d553012f7b	fishnet	remora	5.59418e-07	0.000342867	0.975531
0461f875-7326-45db-85d1-3576168eb64f	fishnet	remora	5.50951e-07	0.000199395	0.973384
0462541c-e46a-4f5d-a0dc-367e4fa81a2f	fishnet	remora	8.79939e-07	0.000305048	0.970241
04637a7b-9bd3-4dff-a4ac-6a35efaf221b	fishnet	remora	5.30419e-07	0.000217245	0.981656
0463d07d-7ee8-4b3a-9943-502a09475fec	fishnet	remora	5.71917e-07	0.000313873	0.980253
04649240-7619-48c1-8111-61f4608df45b	fishnet	remora	3.18232e-07	0.000226137	0.985379
0465d3c8-5126-4919-9c03-82ce60ba52c6	fishnet	remora	2.52957e-06	0.00301061	0.947775
0466ada6-dbc1-4a83-b8fc-d886a806e8d2	fishnet	remora	5.52745e-07	0.00040791	0.9813
04673c0c-ab13-4c17-b317-ed167770eda9	fishnet	remora	9.25483e-07	0.000455311	0.97557
0467ddc5-a2e3-46a0-87ff-1ba1521fb555	fishnet	remora	1.21784e-06	0.000452016	0.980705
0467e7ae-d15e-4ed8-8935-237ca03d2b79	fishnet	remora	3.79653e-07	0.000310066	0.983319
0467f241-4caf-4b54-b398-4c2e4dd95d86	fishnet	remora	1.16247e-06	0.000551934	0.97084
0467f245-65a4-4613-a95d-096d494614ae	fishnet	remora	7.85171e-07	0.00038079	0.972961
04688fb4-2989-4dcd-9a77-7b3545c17610	fishnet	remora	2.55843e-07	0.000230911	0.987821
046908d4-8a6a-43fd-989e-9b310debcea6	fishnet	remora	8.75341e-07	0.000423791	0.97354
046aabf1-480b-4480-9e5f-384ae33a14ad	fishnet	remora	1.75999e-07	0.000275539	0.995251
046b2858-5225-40f3-82b9-180814837c77	fishnet	remora	2.38574e-07	0.000219056	0.985712
046ba03a-cee5-4366-9804-6592293c0df5	fishnet	remora	3.81135e-07	0.000410949	0.989077
046c6b5d-1be2-4653-aa57-fb907233f4db	fishnet	remora	1.79916e-06	0.000502008	0.965058
046ca9c5-08a5-4a06-9e6f-9265105c1d7d	fishnet	remora	7.19036e-07	0.000616452	0.964096
046dbcdb-82cd-4ba2-b591-6b5b7229287f	fishnet	remora	2.39096e-07	0.000137824	0.982996
046dcb06-9b5c-4386-8544-a377999ee5fd	fishnet	remora	1.52836e-06	0.00190444	0.958785
046e23b6-edb8-4862-a910-a8fb6d26c17e	fishnet	remora	6.308e-07	0.000382867	0.978545
046e29da-1977-4bfb-b287-ef35b252f5f1	fishnet	remora	1.38035e-06	0.000325305	0.962841
046e9fbb-2ec3-45c4-94fb-fe2f6f12e202	fishnet	remora	7.85519e-07	0.000673892	0.970227
046f2f5a-dd7f-43b5-9d7c-c0b70d8b5e15	fishnet	remora	7.31769e-07	0.000596354	0.98695
046f5ec3-cb8b-4405-8fcc-8c85d2a4e449	fishnet	remora	1.00092e-05	0.00190171	0.961195
0470d0c4-7cad-4113-9ffc-f03e1c726f62	fishnet	remora	9.92556e-07	0.000583297	0.958868
04717743-5970-49ff-b4ad-014e1a208e7e	fishnet	remora	6.30381e-07	0.000366547	0.981726
0472ef03-9e11-4522-bddb-ce2e1fe8ead0	fishnet	remora	3.50101e-07	0.000381646	0.98341
0473ef9f-1021-48d9-be7e-b36dc1d1b52d	fishnet	remora	2.84781e-06	0.00119144	0.966918
04759b25-36d6-4d9e-814b-02f71118241e	fishnet	remora	4.3315e-07	0.00023296	0.978727
0475c24d-ff93-4a7d-bbc6-5fedbac864bd	fishnet	remora	4.41381e-07	0.000539579	0.983802
04774e33-cd27-447a-9c65-8e7e4a4005cb	fishnet	remora	4.85755e-07	0.000237339	0.981016
0477b67e-854a-4568-822a-af129ba7a2fc	fishnet	remora	3.61198e-07	0.00021409	0.985008
047878f3-4057-4d16-8d62-739db67f982f	fishnet	remora	9.70834e-07	0.000617851	0.967169
04787c82-5202-4b14-828e-6d350e3b030c	fishnet	remora	1.5602e-06	0.000819499	0.965219
0479179d-0a11-46ce-a142-fcc43d185520	fishnet	remora	6.17303e-07	0.000256504	0.976036
04794c3c-fe3e-4a73-b2a6-176a3ede6a86	fishnet	remora	3.42976e-07	0.000434363	0.987591
04798343-f636-4a4d-b0cd-fd6e2818a6ae	fishnet	remora	1.6071e-06	0.000418844	0.964239
0479b0eb-f464-4c73-b885-3989861c8412	fishnet	remora	1.79372e-06	0.000400987	0.963585
047a49ae-4d28-4f76-8c6b-6e40d6a05c63	fishnet	remora	5.93585e-07	0.000490083	0.98564
047b5c0d-8c04-4848-abca-62c0f6c9f940	fishnet	remora	7.17058e-07	0.00041024	0.970546
047b9628-8c95-4de8-bd24-a0b3690f4650	fishnet	remora	1.86488e-06	0.000607677	0.962822
047bab34-8cdd-4c4c-95e4-45c635c0fb0c	fishnet	remora	1.09152e-06	0.000378327	0.961575
047bc839-362d-4e98-b77a-c54ceb1b037e	fishnet	remora	1.63509e-06	0.000556986	0.965442
047c57fb-4c43-4ae1-9420-7c4b6f1953ee	fishnet	remora	6.72525e-07	0.000653295	0.984167
047c59e8-84a6-476c-b8bb-d9974f44e7db	fishnet	remora	1.49129e-07	0.000104656	0.987884
047d86fc-9a7e-48ee-a11b-7a5f4809e0b6	fishnet	remora	6.65001e-07	0.000359212	0.977993
047d8bbb-61a9-453c-ab79-71111347fc25	fishnet	remora	4.81403e-07	0.000214838	0.986011
047e4bf0-d8fc-4264-a754-cf45c4033645	fishnet	remora	1.05644e-06	0.000485201	0.978643
047eb2a1-576e-4da8-a743-2214d5479e81	fishnet	remora	1.50521e-06	0.000558191	0.959049
047faa54-57d4-469c-a4a9-031f0b8e4576	fishnet	remora	1.79558e-06	0.000417762	0.957717
048004fb-65f3-43f5-b764-f3cf2d32118b	fishnet	remora	1.05416e-06	0.000533448	0.978204
04815041-27cf-44e4-9866-9fb04ac1b25e	fishnet	remora	9.84045e-07	0.000582676	0.967186
04815f9b-6bb6-423d-9a36-9db089f16f93	fishnet	remora	8.4627e-07	0.000265217	0.968
048163e1-126a-4d37-839f-a9e60a9a4279	fishnet	remora	8.99433e-08	0.00010144	0.996273
0481b4e7-6f37-45dd-b398-17428fe33d79	fishnet	remora	7.58149e-07	0.000584774	0.982437
0481d4f3-74f3-4960-baa8-1b12e014ff0e	fishnet	remora	1.01274e-06	0.000357095	0.969583
04838e26-f3a0-42fc-b415-0d17476f60cf	fishnet	remora	8.06575e-07	0.000245321	0.959301
0483ffc6-b183-43da-b076-47701186779f	fishnet	remora	5.63743e-07	0.00038735	0.975169
0484a6e9-ed83-4cef-ae19-7ba48007f2d1	fishnet	remora	1.23739e-06	0.000653719	0.976963
04857dbd-9a14-44b5-a268-b55fff3da1f3	fishnet	remora	4.19066e-07	0.000169711	0.979831
04859f68-dd18-412a-99b7-a220e6f489c3	fishnet	remora	1.72219e-06	0.000527199	0.963751
0486afe8-f075-425c-8e31-1b1fbdfe1f5e	fishnet	remora	1.63963e-06	0.00176507	0.967007
048715dd-cabe-4145-a902-3c20cfbbf52b	fishnet	remora	1.45159e-06	0.000752731	0.963793
048891bc-77a8-45bd-a868-320a4f3ef8d7	fishnet	remora	8.70112e-07	0.000585609	0.96256
0488d391-c2d0-42d6-8ede-62425bdbae79	fishnet	remora	1.1514e-06	0.000571729	0.964056
04891c0d-e54e-4ce0-8c61-ca018e09d804	fishnet	remora	1.72396e-06	0.000541915	0.945537
048b4fc5-139e-446d-8004-ed84c4ccd39d	fishnet	remora	7.2485e-07	0.000387477	0.979651
048b70d3-2b64-4481-b04d-8dabcd117072	fishnet	remora	8.26423e-07	0.000929412	0.971816
048bb12b-ec24-4afa-8a39-12f962d4177a	fishnet	remora	5.11202e-07	0.000268442	0.985832
048c6a20-b414-417e-92d2-5aac94c19fd2	fishnet	remora	9.07764e-07	0.000436171	0.985439
048cbd0c-7108-445d-9705-3d38c66fa245	fishnet	remora	5.07008e-07	0.000422539	0.987637
048cdd37-f5ac-478f-b083-0ab21a7efa6a	fishnet	remora	4.68691e-07	0.000474563	0.992734
048e33f6-5c70-44d8-816d-eb9d3156b60b	fishnet	remora	5.61899e-07	0.000507406	0.980341
048e4cd0-b28a-4c71-b1f8-c7c6f8c9a809	fishnet	remora	4.05659e-06	0.000830603	0.963392
048e87d4-9fe3-42b0-9c8a-58d9c6a5a45c	fishnet	remora	5.96736e-07	0.000323385	0.978777
048edaa1-a438-4e1d-8e8c-b95a93e6ea18	fishnet	remora	1.0838e-06	0.000690198	0.967208
048ee3f8-8f6b-495f-bcdd-c5dae917d1f3	fishnet	remora	1.38712e-06	0.0003998	0.974269
04909df7-088f-44b9-9ad3-1350d6be0cfa	fishnet	remora	8.7027e-07	0.00038666	0.957749
04923831-6e61-4479-bf61-049ee306800b	fishnet	remora	3.85794e-07	0.000851458	0.98796
0493060f-996b-4f4a-8542-a71f5d49fc67	fishnet	remora	1.02618e-06	0.000846836	0.983913
04947b2c-e2cd-40e4-91fd-73dc6c23c49e	fishnet	remora	1.9437e-06	0.000778143	0.974882
04957e50-b614-41af-a8b9-9be68d9390ca	fishnet	remora	8.60411e-07	0.000481045	0.983949
04972bca-c58f-42a9-ac26-a537a95444dc	fishnet	remora	7.16128e-07	0.000368027	0.976484
0498f1f7-8a9b-4c75-98bd-b5833745220c	fishnet	remora	9.94007e-07	0.000363416	0.967522
04991125-c690-44a7-b3c8-f32f0e5fb664	fishnet	remora	3.51943e-07	0.00018633	0.982806
0499d568-b211-4c98-8d9b-40d04ab70abd	fishnet	remora	3.43916e-07	0.000162261	0.979219
049a7f19-552a-4e32-ab31-756e25e2ac2a	fishnet	remora	4.72279e-07	0.000384147	0.980738
049be21e-2021-452d-ace2-f221d44a3acb	fishnet	remora	2.30657e-07	0.000242397	0.987354
049bf9b5-61a3-40e0-a3eb-66e04e7d12e0	fishnet	remora	6.14342e-07	0.000237286	0.986549
049d8e19-5380-4d67-926d-c02b3923ee8a	fishnet	remora	1.24204e-06	0.000540385	0.963679
049dcacb-857f-40af-bf50-1515ba02f599	fishnet	remora	1.05861e-06	0.000331248	0.966121
049ddd87-e98e-4088-8426-b20cb069fc89	fishnet	remora	4.39529e-07	0.000247843	0.985343
049e843b-8f45-4226-8771-1b6fee5ca5ba	fishnet	remora	7.97863e-07	0.000403933	0.987989
049e89fb-bc83-416c-9eac-d7572ef78777	fishnet	remora	1.89788e-07	0.000213241	0.99228
049eb4d3-c168-40ba-b0fe-88c96f0c2646	fishnet	remora	2.63411e-07	0.000162959	0.988139
049ebcf1-e3ad-4898-aa70-eabea25799f1	fishnet	remora	3.46528e-07	0.000214652	0.984713
049f4930-ca73-4e26-b8c7-3dfd213b025a	fishnet	remora	4.55418e-07	0.00050339	0.981443
049f678c-b047-47da-894a-c93be1bbcd4b	fishnet	remora	6.22152e-07	0.000200977	0.969503
049f8f67-dff0-48bc-83a8-5ff45757eb38	fishnet	remora	1.63168e-07	0.000156035	0.994548
04a08e65-140e-4ae3-84a9-b112316a6d19	fishnet	remora	3.77347e-07	0.000266957	0.983844
04a0a4e2-eb6b-42a1-87f3-9843a7cfbeb4	fishnet	remora	5.61793e-07	0.000391744	0.98813
04a1267c-704e-4eae-a27f-663efa7ab30f	fishnet	remora	1.38976e-06	0.000793159	0.94821
04a15bcf-19f4-4806-adca-fb39741b2668	fishnet	remora	6.01517e-07	0.000468485	0.97542
04a15c34-3af7-44ab-b38e-f1d55fd94a20	fishnet	remora	7.09366e-07	0.000462126	0.97935
04a23f2e-eee1-4d7a-bc67-2c30727b8738	fishnet	remora	1.53203e-06	0.00130193	0.976349
04a2fdc2-1985-43cc-8975-ad60ff68e0bb	fishnet	remora	2.12897e-06	0.000996238	0.954962
04a37919-b8aa-4fbb-8afa-eb38f8bd616f	fishnet	remora	7.2588e-07	0.000565997	0.983022
04a38b5b-1c19-4d4f-bcf6-6b865ce6005a	fishnet	remora	4.02008e-07	0.000231376	0.988513
04a4d6b9-b359-4934-ba68-dda5dce2f0b8	fishnet	remora	7.5144e-07	0.000420774	0.972126
04a50c26-7d48-4697-92e9-56b359d2a0b3	fishnet	remora	2.26529e-06	0.00052734	0.959433
04a52f07-c555-473d-ae88-872e27f740df	fishnet	remora	5.10564e-07	0.000265281	0.983965
04a6f273-d189-48c0-9bb5-796fd799c337	fishnet	remora	8.97582e-07	0.000499821	0.982507
04a72141-d35b-467f-8bab-0624d230acc8	fishnet	remora	5.99709e-07	0.000244792	0.980747
04a80284-7712-4e91-b877-3de644c0cf5f	fishnet	remora	3.6295e-07	0.000317907	0.989742
04a84009-65e1-4e16-8710-a5d3b7bffcb3	fishnet	remora	1.87282e-07	0.000197164	0.992651
04a90f0d-6737-46aa-90bb-e8d93d38874f	fishnet	remora	1.88947e-06	0.000814332	0.96059
04a91e4e-6592-4063-8469-555e77e13fe0	fishnet	remora	7.48662e-07	0.000402159	0.97526
04a99bf3-f963-4007-9f5a-8470f489e64b	fishnet	remora	8.11501e-07	0.000675451	0.963818
04a9ebbb-d210-4fd6-b738-9867bdcd2af2	fishnet	remora	5.89463e-07	0.000554929	0.986608
04ab5b5b-c1ef-46b2-87d4-c117017768ca	fishnet	remora	4.60257e-07	0.000395	0.983021
04ac9ccd-9b7d-4340-8c5e-77b766c56101	fishnet	remora	2.17239e-07	0.000362139	0.99149
04aca4fd-e94b-438d-a4f7-51b61c741490	fishnet	remora	1.00887e-06	0.000649066	0.979845
04adc875-dce5-4c7d-8d66-99de81b5792f	fishnet	remora	3.31872e-07	0.000219539	0.982754
04ae4b49-22b8-45b8-a023-4f27fca43ae8	fishnet	remora	3.77407e-07	0.000332562	0.993699
04ae8c7b-f2d4-41f4-b4c1-2a912e9417c6	fishnet	remora	4.90971e-07	0.000281239	0.98424
04aebc64-0637-4bb5-89ff-44524bebe67a	fishnet	remora	7.97451e-07	0.000429914	0.966205
04aec16a-f108-4db0-9079-ee56e9600f50	fishnet	remora	5.27139e-07	0.000427383	0.971993
04b00795-c758-47ad-9642-ae5107fcc67b	fishnet	remora	4.62344e-07	0.000334755	0.981882
04b123f1-1f72-4fed-bf68-60f948199ba9	fishnet	remora	1.34786e-07	0.000242836	0.996435
04b37c6f-f71a-4a36-ad3d-9e159f6f8c30	fishnet	remora	7.08057e-07	0.000354921	0.969695
04b4c43e-659a-4276-9064-c5c986f7f67b	fishnet	remora	1.0533e-06	0.000494071	0.981533
04b4cc83-4086-4f59-8aaf-906d76cf4dd2	fishnet	remora	6.62549e-07	0.00035859	0.979391
04b4e397-a0d5-4a94-975c-51eb5c8aeac3	fishnet	remora	7.25419e-07	0.000368571	0.975317
04b5c5ce-1b50-470b-815b-eca284cea725	fishnet	remora	7.02556e-07	0.00029678	0.9802
04b6d3f0-b27e-4855-a871-89c49343b1da	fishnet	remora	9.01738e-07	0.000394265	0.975099
04b769d4-4524-4f83-90fc-c599089cae6f	fishnet	remora	1.77748e-06	0.000479736	0.972054
04b7b37e-0159-43cf-88fc-2f03b77a94b5	fishnet	remora	8.57508e-07	0.000738325	0.984733
04b8366e-49b3-4508-9c8a-f002a14705e9	fishnet	remora	2.73402e-06	0.00230821	0.96129
04b86540-391b-43d3-95ce-d2599cf68e40	fishnet	remora	4.10019e-07	0.000566996	0.989227
04b8af71-c4aa-40c9-b694-93e84bc25e2e	fishnet	remora	2.08198e-06	0.000902057	0.953013
04b93254-526f-4227-8a5f-2df16ad18b8e	fishnet	remora	6.75298e-07	0.000388081	0.980106
04b992cb-a771-4f12-9110-83b0f408c67d	fishnet	remora	9.12411e-07	0.000390231	0.963916
04bb4ca8-72b2-4f46-b2b6-163a7ab429da	fishnet	remora	6.70127e-07	0.000371405	0.973978
04bbc789-31de-468c-8b3f-3d37ccb741a1	fishnet	remora	8.15351e-07	0.00046666	0.968974
04bc3c98-6fe3-4946-9891-5c7c118f4001	fishnet	remora	4.39659e-07	0.00018171	0.976249
04bc5a41-d208-4076-bc8d-b00b915cb1e0	fishnet	remora	1.85583e-07	0.000144175	0.99133
04bd7923-309a-4c00-85bf-48d95fedc77f	fishnet	remora	2.33385e-07	0.000299466	0.98668
04bdaf4b-2936-4722-9ae6-3772dc74b276	fishnet	remora	4.7306e-07	0.000187899	0.975098
04be24d3-f3d4-48d4-9294-144184822519	fishnet	remora	3.00223e-07	0.000360632	0.989522
04bedcaa-bdee-4ae6-9310-67732cf17bf5	fishnet	remora	5.59228e-07	0.000164686	0.972215
04bfd2d9-adcc-4afb-b281-6a22a13c0ad8	fishnet	remora	4.29892e-07	0.000273851	0.98078
04bfd6a0-4757-47fe-8e29-fb4ce5a1cacb	fishnet	remora	1.16084e-06	0.000751749	0.986116
04bff127-a8d5-48f8-b228-25a8d061978e	fishnet	remora	5.88829e-07	0.000874695	0.989905
04c07ce3-9839-41c3-8c8e-36bed8742cdd	fishnet	remora	1.02653e-06	0.000331195	0.95586
04c0fe96-8ef9-44dd-982e-50b90d24fd30	fishnet	remora	8.02663e-07	0.000343473	0.969137
04c19090-3e35-4755-b8a1-c9e1139be0c0	fishnet	remora	1.9904e-06	0.00069909	0.971425
04c1aa8f-97cb-45ff-9007-8770aca6ca46	fishnet	remora	1.02951e-06	0.000544387	0.957373
04c1f84d-48aa-45e5-88e1-be26729bf6d4	fishnet	remora	2.48275e-07	0.000211988	0.988674
04c3280c-e9da-4f1e-8dc5-cad304e5a141	fishnet	remora	6.18381e-07	0.000271426	0.970259
04c3c5c6-29cc-4e18-af19-f019aedb830e	fishnet	remora	6.35818e-07	0.000214279	0.98238
04c5280f-950e-4a48-9bb0-e53139b8d333	fishnet	remora	1.88619e-06	0.000673019	0.957849
04c5d821-4132-4eae-9aaa-8332d9aa0afc	fishnet	remora	8.571e-07	0.000306762	0.955833
04c80100-a8bd-41c1-ba0b-230df560783c	fishnet	remora	8.05585e-07	0.000831324	0.986151
04c89c08-dda5-49b7-8014-a165ab458b9e	fishnet	remora	7.74392e-07	0.000612893	0.978955
04c8ef72-64b3-4a9e-a8a4-f108d5222f5c	fishnet	remora	5.50021e-07	0.000308016	0.981018
04c97f94-8aef-4992-9ee0-4be214e8d743	fishnet	remora	3.60221e-07	0.000211171	0.976471
04ce3b53-ea40-4ae9-9d62-50eea3e4f476	fishnet	remora	1.08829e-06	0.00038073	0.974953
04cebf3f-67d4-49a6-90f5-80ee845fc431	fishnet	remora	9.82673e-07	0.00104942	0.979932
04d0db7c-4aac-4302-bedc-0cecbeceaedd	fishnet	remora	5.3609e-07	0.000415744	0.987681
04d10309-45b4-4f44-bf92-d13e038af408	fishnet	remora	5.53132e-07	0.000573559	0.978222
04d14d1d-6c42-42bc-a32d-a5f7be03b3b1	fishnet	remora	5.86302e-07	0.000668075	0.981542
04d2e524-09a6-4cdf-b8e3-1cac312bf6bb	fishnet	remora	1.41626e-07	0.000140969	0.990698
04d560ed-595f-48b7-944c-5a8612ccf2f0	fishnet	remora	6.05036e-07	0.000584766	0.976091
04d5acfb-d80a-405c-8959-06bc4ac02819	fishnet	remora	6.85111e-07	0.000240562	0.960821
04d5bce5-d556-48d1-8ab4-47079030b945	fishnet	remora	5.43377e-07	0.000290867	0.98108
04d5de78-6b29-4684-ac3b-72b534644faa	fishnet	remora	2.98276e-07	0.000215324	0.988802
04d678bf-659e-4118-991a-1c3ab614b909	fishnet	remora	1.21561e-06	0.000491422	0.958833
04d68a86-e455-4daf-94a5-ef233c8201a6	fishnet	remora	3.51461e-07	0.000318105	0.990197
04d75e5c-2667-4b00-bb1a-88b30db84ee1	fishnet	remora	1.25204e-06	0.000305364	0.965103
04d7e63c-c9ce-40e1-9958-449858cc142f	fishnet	remora	4.20128e-07	0.000394414	0.991711
04d84e46-7b15-4244-bb33-8e4fbf73fc9a	fishnet	remora	1.26504e-06	0.000385505	0.974212
04d9d67d-13a8-4bca-9724-cd6d2ff59992	fishnet	remora	4.17537e-07	0.00147869	0.984875
04da2b8b-a604-4861-bef0-15421dad11eb	fishnet	remora	2.58809e-07	0.000188334	0.992472
04dad84c-d1f4-43f5-9161-55aa4382e963	fishnet	remora	8.16743e-07	0.000326477	0.988386
04db7249-9ba2-462e-8b28-2254706fedc3	fishnet	remora	9.08224e-07	0.00034031	0.968206
04dbc8ab-9139-4d84-8b9a-7e58fbf1e644	fishnet	remora	7.75764e-07	0.00032979	0.979538
04dc3247-b3af-4e94-bb1e-13d8ae97f092	fishnet	remora	2.97009e-06	0.000517777	0.964336
04dc7b4e-f562-47be-914f-bf518d14714c	fishnet	remora	8.93424e-07	0.000325822	0.978035
04de3c30-fe25-4576-be05-48e334a97010	fishnet	remora	1.63021e-06	0.000349406	0.951391
04de692a-6e36-493f-a226-e7c16b60bb59	fishnet	remora	1.5901e-06	0.000339909	0.956591
04dede81-8b37-4089-a0ca-de2c2af36fb4	fishnet	remora	8.32301e-07	0.000299931	0.969385
04df4d8b-86fb-4f18-9133-93bbcd9aad4f	fishnet	remora	7.44037e-07	0.000240721	0.977872
04e1860d-993c-4ba3-980f-ce6c2510b504	fishnet	remora	3.23425e-07	0.000245354	0.986297
04e29c7a-16ae-49b5-b72f-efa9fef50567	fishnet	remora	5.03381e-07	0.000488743	0.985348
04e31bd6-72a2-47aa-a969-3f0316406baf	fishnet	remora	1.07087e-06	0.000395924	0.972671
04e3d247-b1d4-42de-8da6-94412f90dd99	fishnet	remora	8.66123e-07	0.000733219	0.972029
04e52efa-be71-4336-a774-132d4cbdee50	fishnet	remora	6.67376e-07	0.000328947	0.9699
04e76533-273b-48fe-bbe7-1ad8223558f9	fishnet	remora	1.05556e-06	0.000940083	0.983042
04e79d5f-ce8b-4ed5-a932-cc8485db26d6	fishnet	remora	2.62139e-07	0.000188561	0.985205
04e8d594-cb3f-432d-9217-9d5c3372a9af	fishnet	remora	6.48204e-06	0.000619989	0.799881
04e9154d-3b99-4705-8f07-68b1c8c58136	fishnet	remora	6.49255e-07	0.000273605	0.969185
04e9c3cb-bb77-4bb1-aa0e-0675e1dd2209	fishnet	remora	3.85093e-06	0.00204442	0.975044
04e9c607-bb07-4646-8169-e3205d6027f7	fishnet	remora	5.8708e-07	0.000308642	0.978352
04eaee39-5db5-4ee6-bdc9-fee0d0e06697	fishnet	remora	9.07556e-07	0.000406539	0.973732
04ec1134-1742-4275-a7a7-62d9de37bc98	fishnet	remora	1.02789e-06	0.000351913	0.961551
04edf02e-baac-40c5-b0d6-80bfbf42c21c	fishnet	remora	1.81631e-06	0.00106709	0.962381
04eef467-44f2-4ed9-902d-6466e50c541c	fishnet	remora	2.07548e-06	0.000760404	0.976193
04ef4a38-8223-4eb0-877c-c9b06a867e63	fishnet	remora	1.29698e-06	0.000771787	0.979976
04ef75d4-1f10-4bcd-aaac-8a2f76ba408e	fishnet	remora	1.89976e-06	0.00053898	0.956697
04efdf2a-65d0-44ef-bd79-fc39b42e4b44	fishnet	remora	9.07932e-07	0.000549007	0.980054
04f0b4fa-b142-47f5-8b60-728572488497	fishnet	remora	9.89244e-07	0.000720084	0.984669
04f20080-8e7a-4525-b4ee-68debffd2488	fishnet	remora	8.45986e-07	0.000956073	0.965632
04f2d365-ee2c-4b91-8dda-aa61147c843a	fishnet	remora	7.80176e-07	0.000531611	0.985304
04f475b9-a337-4974-b122-20541ff880b1	fishnet	remora	1.38947e-06	0.000394672	0.971752
04f68bc9-77c9-4389-9918-ab195630284b	fishnet	remora	5.91937e-07	0.000302642	0.987994
04f855db-a05e-4061-b03a-65c2eb926c4d	fishnet	remora	8.04833e-07	0.000282051	0.973399
04f88d9f-da0f-4c76-b70a-563b2fc45c58	fishnet	remora	2.27401e-07	0.000271631	0.990683
04f909dc-a612-42db-be79-ae922e5742f3	fishnet	remora	1.96916e-06	0.00055633	0.963421
04f95a60-8a95-42eb-a0b5-104c26a521bd	fishnet	remora	4.87896e-07	0.000300338	0.987772
04f9bc73-1465-45ab-a993-559f5c5665a5	fishnet	remora	5.56653e-07	0.000383354	0.984106
04faafdf-9fc5-45f1-8111-62f68b0f9756	fishnet	remora	2.17042e-07	0.000396005	0.989917
04fcd5f7-20fc-45d1-8d1b-f4758e70aa37	fishnet	remora	7.38755e-07	0.000275232	0.970845
04fd55e2-2304-4883-bfb8-927c3aa76094	fishnet	remora	6.06238e-07	0.000297285	0.988703
04fe0394-7933-4d57-8d78-0a141b290862	fishnet	remora	5.73241e-07	0.000629749	0.990811
04fef76d-906f-4154-b85f-e5ff8a832b0a	fishnet	remora	3.7612e-07	0.000259954	0.983607
04ff0a1b-282e-4487-886e-cd638e12bb5f	fishnet	remora	9.66467e-07	0.000665028	0.97073
04ff1b3b-0a58-4ffc-9ced-7b21dc8c913c	fishnet	remora	3.2688e-07	0.00040379	0.983883
04ff2e02-7bb8-40d3-b15f-55b77d061fca	fishnet	remora	2.46803e-06	0.000683202	0.968657
0501a875-f9cd-4076-bb3b-d00badf3896b	fishnet	remora	4.53332e-07	0.000260729	0.985591
0502720e-1e10-4a0e-b35f-7d8bd4c075ba	fishnet	remora	4.3426e-07	0.000387845	0.981824
05057a4a-b8b3-4293-9783-1544698ab8a2	fishnet	remora	2.34468e-06	0.00074522	0.973707
05063ffd-7aa3-4eb0-a4e4-4b2652301b51	fishnet	remora	3.41022e-07	0.000365357	0.983036
0506b20b-b826-46eb-84f0-86828b8c1dc2	fishnet	remora	7.7435e-07	0.000418863	0.9801
0507605d-4c81-4e4d-b306-8c902eabb5e6	fishnet	remora	8.05789e-07	0.000452284	0.980387
05078db5-ed73-4488-8e7d-53a0324e7aba	fishnet	remora	1.04849e-06	0.000557486	0.959171
050790fd-1287-44e3-aab4-c30c2e965c00	fishnet	remora	1.45751e-06	0.000963614	0.974422
05079874-d750-44b9-9164-8a7d880fd975	fishnet	remora	5.17861e-07	0.000401137	0.978706
0507b072-0b17-4d96-b8b3-26aa77e733a3	fishnet	remora	3.74692e-07	0.000356502	0.983572
05090d7e-9056-4b20-ac8e-cac1ce347d15	fishnet	remora	3.15594e-07	0.000278191	0.987721
050942a2-c328-42ab-9589-1174b80ddf3c	fishnet	remora	1.97716e-07	0.000215635	0.990191
050b1353-2fb9-4d49-a2cc-1047e432a830	fishnet	remora	7.61811e-07	0.000440083	0.974054
0510bed6-2816-4d41-b27b-604e4581b019	fishnet	remora	3.09731e-07	0.000314213	0.987999
0510f976-7dde-4a23-97b4-d1342917fc3b	fishnet	remora	2.30444e-06	0.000666667	0.964128
05113f4b-11b2-45c2-8bde-898449cf25fa	fishnet	remora	4.68839e-07	0.000245128	0.985414
05114fae-f733-4050-bb00-948fec6c889c	fishnet	remora	6.17718e-07	0.000278164	0.979996
05124871-5097-4e2f-ab20-46f12e2fbcbe	fishnet	remora	2.54874e-06	0.000593752	0.89718
0512ee77-acd8-4a5b-902f-39d17a0eb412	fishnet	remora	1.59439e-06	0.000745439	0.977513
0515c6d0-32ea-48a5-a0a4-988174c381c5	fishnet	remora	5.21513e-07	0.000317388	0.988589
0516b7f7-6b10-4d2c-8dab-28972f57e130	fishnet	remora	1.13664e-06	0.000605152	0.971662
0517bfe0-4620-4860-ae92-cce888a289e4	fishnet	remora	4.5431e-07	0.000261746	0.982234
0517f4cc-0416-4c95-9d4e-0b075c5f5526	fishnet	remora	1.30473e-06	0.000803569	0.955469
0517fc98-5a7c-412b-a737-105d083ee88a	fishnet	remora	1.29831e-06	0.00057517	0.978307
051816cf-821b-426e-913e-41197ac20f7b	fishnet	remora	4.11421e-07	0.000292752	0.98529
05183f88-f318-49d8-8d3a-012327a00117	fishnet	remora	7.76866e-07	0.000333873	0.968176
0518b1a7-5a49-4e46-96f3-3a55d18a32b6	fishnet	remora	7.04149e-07	0.000856679	0.967365
051924f6-5a67-4187-8081-83b7a758abfe	fishnet	remora	1.38746e-06	0.000791337	0.960332
051b3966-8e84-45fc-b165-ccae6341e9c5	fishnet	remora	7.21657e-07	0.000555947	0.987321
051b74ee-ee56-4397-96e3-c426ca62ed4d	fishnet	remora	8.02496e-07	0.000418808	0.972614
051b9e75-4715-4eef-858c-600885b38b81	fishnet	remora	8.34199e-07	0.00041224	0.979314
051c22e0-8def-4dc4-a669-44af96b8a776	fishnet	remora	1.02418e-06	0.000804875	0.971313
051d02d1-3aab-42fb-ae47-12eb4a7286cb	fishnet	remora	1.8296e-06	0.00227036	0.986348
051e3ac5-0161-4faf-a243-ee8186cbffd0	fishnet	remora	9.39638e-07	0.000583784	0.986204
051e4bab-d9ca-4521-adc0-5e9e4f48a8d7	fishnet	remora	7.41481e-07	0.000416351	0.983319
051ed90e-0ccc-4880-8de7-6a4f3af24656	fishnet	remora	2.60552e-07	0.000253594	0.990485
051edc63-11ab-460d-bed9-2cf958779070	fishnet	remora	1.20991e-06	0.000492282	0.95839
051f3f37-513b-4994-921d-b814eaa957fd	fishnet	remora	1.67884e-06	0.000554201	0.95928
05201ab9-6fb8-498a-8510-b0ef8d417933	fishnet	remora	3.8228e-07	0.000204863	0.979209
05211094-0828-4991-9673-23d033d9defe	fishnet	remora	1.39208e-06	0.000349007	0.970763
05227c43-9cf2-40f6-8244-d74596df8528	fishnet	remora	4.87442e-07	0.00041552	0.984016
05237d40-ae40-40ba-8588-b62176d6b65f	fishnet	remora	1.27063e-06	0.000424213	0.960061
0523d2a0-06ea-4d87-a390-2c44e1d6d9c5	fishnet	remora	8.83363e-07	0.000508616	0.976594
05248b43-cc28-4abd-ac8c-48dcf320cbaf	fishnet	remora	5.06026e-07	0.000636864	0.980262
052548d7-df93-4c1c-9506-2796adf4441c	fishnet	remora	1.40603e-06	0.00105534	0.974353
0525edb4-3dcb-45a5-820b-964ff5c665f6	fishnet	remora	1.32998e-06	0.000678271	0.97233
05267a5c-e51e-4975-b7bc-63898b7db323	fishnet	remora	1.29856e-06	0.000432446	0.971565
0526d97a-0528-4994-8426-c75f1ede5147	fishnet	remora	9.8317e-07	0.000307899	0.973687
052780ed-35f0-42c8-9106-67fca6ed451f	fishnet	remora	3.66681e-07	0.000381599	0.983224
0527ba6b-55be-4e54-9140-76e70a7c484a	fishnet	remora	3.04327e-06	0.000955229	0.979064
05280ab5-39b2-4860-a950-b436030bd0bc	fishnet	remora	2.43735e-06	0.000657493	0.937901
0528aca2-0242-47b1-9d60-cae53b4ee67b	fishnet	remora	1.81862e-06	0.000951939	0.960019
0528c97b-abf4-4bb2-8cf7-4bcd8de0dea3	fishnet	remora	4.56209e-07	0.000389712	0.990199
0528c99d-82ed-4c42-8aa0-e0c6827d7e74	fishnet	remora	2.3871e-07	0.000170555	0.985148
[truncated: 97,718 more rows]

## Sheet: Query-to-signal example
base_index	fishnet	remora	uncalled4	f5c
0	814	814
1	818	818
2	822	822
3	826	826
4	830	830	850	7
5	834	834	856	163
6	838	838	861	171
7	843	843	865	177
8	861	861	874	182
9	865	865	878	188
10	874	874	886
11	878	878	901	245
12	886	886	910	342
13	901	901	914	360
14	910	910	922	424
15	914	914	931	429
16	922	922	941	434
17	941	941	954	444
18	946	946	967	536
19	954	954	974	542
20	967	967	977	605
21	974	974	982	611
22	978	978	1008	615
23	982	982	1013	641
24	1005	1005	1016	657
25	1009	1009	1021	684
26	1013	1013	1027	711
27	1021	1021	1042	718
28	1029	1029	1049	724
29	1042	1042	1058	914
30	1049	1049	1070	918
31	1058	1058	1080	922
32	1062	1062	1109	951
33	1070	1070	1116	982
34	1116	1116	1126	1021
35	1120	1120	1136	1027
36	1126	1126	1139	1116
37	1136	1136	1147	1147
38	1140	1140	1164	1154
39	1147	1147	1177	1177
40	1174	1174	1182	1182
41	1178	1178	1189	1189
42	1182	1182	1198	1198
43	1191	1191	1210	1210
44	1198	1198	1219	1219
45	1210	1210	1227	1227
46	1218	1218	1233	1233
47	1227	1227	1245	1245
48	1231	1231	1261	1248
49	1245	1245	1264	1264
50	1260	1260	1268	1268
51	1264	1264	1276	1276
52	1268	1268	1283	1283
53	1276	1276	1288	1288
54	1283	1283	1315	1334
55	1288	1288	1328	1350
56	1314	1314	1331	1355
57	1327	1327	1360	1360
58	1334	1334	1370	1370
59	1360	1360	1376	1376
60	1370	1370	1383	1383
61	1376	1376	1386	1386
62	1380	1380	1398	1398
63	1394	1394	1401	1401
64	1398	1398	1413	1407
65	1402	1402	1421	1418
66	1417	1417	1427	1421
67	1421	1421	1434	1424
68	1427	1427	1450	1427
69	1434	1434	1453	1450
70	1447	1447	1462	1462
71	1451	1451	1475	1475
72	1462	1462	1480	1480
73	1475	1475	1486	1483
74	1480	1480	1492	1486
75	1484	1484	1496	1496
76	1488	1488	1510	1536
77	1496	1496	1519	1539
78	1535	1535	1533	1544
79	1539	1539	1536	1551
80	1543	1543	1544	1554
81	1547	1547	1587	1587
82	1551	1551	1594	1594
83	1587	1587	1601	1601
84	1594	1594	1612	1612
85	1601	1601	1637	1637
86	1612	1612	1651	1642
87	1637	1637	1664	1664
88	1642	1642	1677	1677
89	1664	1664	1698	1698
90	1677	1677	1704	1709
91	1698	1698	1721	1721
92	1709	1709	1730	1730
93	1721	1721	1807	1807
94	1731	1731	1822	1822
95	1807	1807	1825	1825
96	1822	1822	1835	1835
97	1826	1826	1843	1843
98	1839	1839	1853	1853
99	1843	1843	1859	1856
100	1853	1853	1868	1868
101	1859	1859	1886	1886
102	1868	1868	1890	1890
103	1886	1886	1900	1900
104	1890	1890	1915	1915
105	1900	1900	1919	1919
106	1915	1915	1935	1923
107	1919	1919	1939	1939
108	1923	1923	1944	1944
109	1938	1938	1962	1962
110	1944	1944	1981	1966
111	1962	1962	1995	1995
112	1966	1966	2012	2012
113	1995	1995	2028	2028
114	2012	2012	2094	2081
115	2026	2026	2097	2094
116	2093	2093	2102	2102
117	2097	2097	2118	2109
118	2102	2102	2136	2118
119	2118	2118	2142	2136
120	2130	2130	2146	2146
121	2136	2136	2149	2149
122	2145	2145	2160	2156
123	2149	2149	2164	2160
124	2157	2157	2181	2181
125	2161	2161	2203	2191
126	2181	2181	2207	2207
127	2205	2205	2215	2215
128	2209	2209	2233	2220
129	2215	2215	2242	2233
130	2233	2233	2252	2252
131	2248	2248	2260	2260
132	2252	2252	2268	2268
133	2260	2260	2294	2294
134	2268	2268	2297	2297
135	2287	2287	2312	2303
136	2293	2293	2328	2328
137	2297	2297	2332	2332
138	2327	2327	2342	2342
139	2332	2332	2357	2357
140	2342	2342	2401	2365
141	2357	2357	2406	2406
142	2401	2401	2417	2417
143	2406	2406	2424	2424
144	2417	2417	2439	2439
145	2424	2424	2451	2451
146	2439	2439	2469	2469
147	2451	2451	2499	2499
148	2469	2469	2511	2515
149	2500	2500	2518	2518
150	2520	2520	2537	2521
151	2534	2534	2542	2542
152	2538	2538	2552	2552
153	2542	2542	2561	2561
154	2552	2552	2565	2565
155	2561	2561	2571	2571
156	2565	2565	2583	2583
157	2571	2571	2595	2595
158	2582	2582	2600	2600
159	2595	2595	2610	2610
160	2600	2600	2624	2624
161	2610	2610	2628	2628
162	2624	2624	2659	2656
163	2628	2628	2662	2659
164	2654	2654	2666	2662
165	2659	2659	2674	2674
166	2663	2663	2719	2719
167	2674	2674	2722	2722
168	2719	2719	2733	2733
169	2723	2723	2760	2760
170	2733	2733	2768	2768
171	2760	2760	2779	2779
172	2764	2764	2788	2788
173	2784	2784	2788	2796
174	2788	2788	2796	2799
175	2796	2796	2808	2808
176	2806	2806	2815	2815
177	2810	2810	2820	2820
178	2815	2815	2826	2830
179	2820	2820	2835	2835
180	2827	2827	2848	2848
181	2835	2835	2856	2856
182	2849	2849	2863	2863
183	2856	2856	2870	2870
184	2863	2863	2875	2875
185	2870	2870	2886	2886
186	2875	2875	2893	2893
187	2886	2886	2904	2904
188	2893	2893	2912	2912
189	2904	2904	2915	2915
190	2911	2911	2915	2976
191	2915	2915	2923	2984
192	2919	2919	2976	2992
193	2923	2923	3008	3008
194	2992	2992	3020	3013
195	3008	3008	3024	3024
196	3020	3020	3029	3029
197	3024	3024	3035	3035
198	3029	3029	3041	3041
199	3035	3035	3045	3045
200	3039	3039	3050	3064
201	3043	3043	3070	3070
202	3047	3047	3080	3080
203	3070	3070	3090	3090
204	3080	3080	3103	3103
205	3090	3090	3119	3119
206	3103	3103	3144	3144
207	3119	3119	3147	3147
208	3143	3144	3153	3153
209	3147	3148	3160	3160
210	3153	3153	3175	3175
211	3159	3159	3179	3179
212	3173	3173	3183	3190
213	3179	3179	3202	3202
214	3190	3190	3208	3208
215	3202	3202	3245	3245
216	3205	3205	3265	3265
217	3245	3245	3276	3276
218	3265	3265	3294	3294
219	3276	3276	3309	3303
220	3296	3296	3314	3309
221	3310	3310	3319	3319
222	3314	3314	3322	3322
223	3318	3318	3331	3331
224	3322	3322	3344	3344
225	3331	3331	3362	3362
226	3344	3344	3367	3367
227	3361	3362	3378	3394
228	3367	3367	3394	3399
229	3385	3385	3412	3412
230	3389	3389	3421	3421
231	3412	3412	3449	3449
232	3421	3421	3456	3452
233	3449	3449	3463	3456
234	3455	3455	3466	3463
235	3459	3459	3474	3474
236	3463	3463	3491	3491
237	3474	3474	3496	3496
238	3491	3491	3511	3501
239	3496	3496	3520	3520
240	3516	3516	3525	3525
241	3520	3520	3532	3532
242	3525	3525	3537	3537
243	3532	3532	3547	3547
244	3537	3537	3557	3557
245	3547	3547	3562	3562
246	3551	3551	3588	3588
247	3584	3584	3595	3595
248	3588	3588	3601	3601
249	3596	3596	3611	3611
250	3601	3601	3669	3642
251	3605	3605	3675	3675
252	3657	3657	3684	3684
253	3675	3675	3702	3702
254	3684	3684	3713	3713
255	3702	3702	3722	3722
256	3713	3713	3745	3726
257	3726	3726	3749	3749
258	3731	3731	3754	3754
259	3749	3749	3758	3758
260	3754	3754	3778	3778
261	3758	3758	3792	3813
262	3778	3778	3822	3822
263	3820	3820	3830	3830
264	3825	3825	3842	3842
265	3830	3830	3892	3892
266	3843	3843	3896	3896
267	3892	3892	3910	3910
268	3896	3896	3917	3917
269	3910	3910	3921	3921
270	3917	3917	3927	3927
271	3921	3921	3934	3934
272	3927	3927	3939	3944
273	3934	3934	3950	3950
274	3938	3938	3958	3958
275	3950	3950	3963	3963
276	3958	3958	3973	3973
277	3963	3963	3981	3981
278	3973	3973	3990	3990
279	3981	3981	4015	4015
280	3988	3988	4033	4033
281	4015	4015	4042	4045
282	4033	4033	4054	4054
283	4044	4044	4079	4073
284	4054	4054	4085	4085
285	4079	4079	4088	4088
286	4084	4084	4092	4092
287	4088	4088	4101	4101
288	4092	4092	4106	4106
289	4101	4101	4119	4119
290	4108	4108	4129	4129
291	4119	4119	4138	4141
292	4129	4129	4160	4164
293	4141	4141	4171	4171
294	4164	4164	4192	4192
295	4171	4171	4196	4196
296	4192	4192	4210	4210
297	4196	4196	4219	4222
298	4210	4210	4226	4226
299	4222	4222	4236	4236
300	4226	4226	4247	4247
301	4235	4235	4253	4253
302	4247	4247	4262	4258
303	4253	4253	4268	4262
304	4257	4257	4275	4275
305	4262	4262	4288	4288
306	4275	4275	4315	4315
307	4288	4288	4324	4324
308	4318	4318	4327	4327
309	4322	4322	4347	4347
310	4326	4326	4355	4355
311	4349	4349	4359	4359
312	4355	4355	4367	4367
313	4362	4362	4373	4373
314	4367	4367	4381	4381
315	4372	4372	4395	4395
316	4381	4381	4404	4404
317	4385	4385	4425	4425
318	4404	4404	4468	4468
319	4425	4425	4475	4471
320	4468	4468	4487	4475
321	4475	4475	4493	4493
322	4479	4479	4500	4500
323	4483	4483	4511	4511
324	4500	4500	4516	4516
325	4511	4511	4525	4525
326	4516	4516	4554	4543
327	4525	4525	4562	4562
328	4554	4554	4570	4566
329	4562	4562	4579	4570
330	4567	4567	4587	4574
331	4571	4571	4590	4590
332	4576	4576	4601	4605
333	4590	4590	4617	4617
334	4604	4604	4625	4620
335	4617	4617	4629	4625
336	4624	4624	4634	4634
337	4630	4630	4650	4650
338	4634	4634	4669	4669
339	4650	4650	4672	4672
340	4669	4669	4676	4676
341	4673	4673	4693	4693
342	4677	4677	4699	4703
343	4693	4693	4703	4710
344	4700	4700	4730	4730
345	4704	4704	4741	4736
346	4730	4730	4746	4746
347	4742	4742	4768	4768
348	4746	4746	4780	4780
349	4768	4768	4794	4791
350	4780	4780	4798	4794
351	4790	4790	4806	4806
352	4794	4794	4814	4814
353	4806	4806	4827	4827
354	4814	4814	4832	4832
355	4827	4827	4842	4842
356	4832	4832	4847	4847
357	4842	4842	4863	4863
358	4847	4847	4869	4869
359	4863	4863	4876	4876
360	4869	4869	4885	4885
361	4876	4876	4897	4897
362	4885	4885	4903	4903
363	4897	4897	4915	4915
364	4903	4903	4933	4946
365	4914	4914	4961	4961
366	4946	4946	4968	4968
367	4961	4961	4971	4971
368	4967	4967	4975	4975
369	4971	4971	4980	4980
370	4975	4975	4980	4987
371	4980	4980	4987	4995
372	4984	4984	4995	5001
373	4988	4988	5008	5008
374	4994	4994	5012	5012
375	5008	5008	5021	5021
376	5012	5012	5036	5036
377	5022	5022	5050	5050
378	5036	5036	5053	5056
379	5050	5050	5060	5060
380	5055	5055	5069	5069
381	5064	5064	5085	5085
382	5069	5069	5095	5095
383	5085	5085	5101	5101
384	5095	5095	5108	5108
385	5101	5101	5112	5112
386	5108	5108	5116	5116
387	5112	5112	5132	5132
388	5117	5117	5141	5137
389	5132	5132	5154	5154
390	5150	5150	5193	5177
391	5154	5154	5200	5200
392	5177	5177	5206	5206
393	5202	5202	5211	5211
394	5206	5206	5220	5220
395	5211	5211	5244	5244
396	5220	5220	5248	5248
397	5244	5244	5256	5256
398	5248	5248	5274	5260
399	5256	5256	5286	5286
400	5274	5274	5293	5293
401	5286	5286	5321	5321
402	5293	5293	5325	5325
403	5321	5321	5330	5330
404	5325	5325	5336	5336
405	5330	5330	5348	5348
406	5336	5336	5357	5357
407	5348	5348	5374	5374
408	5357	5357	5398	5388
409	5374	5374	5402	5391
410	5398	5398	5405	5402
411	5402	5402	5592	5592
412	5406	5406	5604	5598
413	5592	5592	5610	5610
414	5604	5604	5618	5618
415	5610	5610	5623	5623
416	5618	5618	5627	5627
417	5623	5623	5638	5638
418	5629	5629	5650	5650
419	5638	5638	5661	5661
420	5654	5654	5667	5667
421	5658	5658	5671	5671
422	5667	5667	5680	5680
423	5671	5671	5687	5687
424	5680	5680	5698	5698
425	5687	5687	5702	5702
426	5698	5698	5713	5713
427	5702	5702	5718	5718
428	5712	5712	5726	5726
429	5718	5718	5741	5741
430	5726	5726	5747	5747
431	5741	5741	5752	5752
432	5747	5747	5763	5763
433	5752	5752	5768	5768
434	5763	5763	5776	5776
435	5768	5768	5812	5812
436	5776	5776	5827	5827
437	5812	5812	5834	5834
438	5827	5827	5846	5846
439	5834	5834	5849	5849
440	5844	5844	5852	5852
441	5848	5848	5861	5861
442	5852	5852	5868	5868
443	5861	5861	5878	5874
444	5870	5870	5878	5878
445	5878	5878	5889	5889
446	5885	5885	5901	5901
447	5889	5889	5909	5909
448	5901	5901	5920	5926
449	5909	5909	5942	5942
450	5913	5913	5952	5952
451	5942	5942	5968	5968
452	5952	5952	5984	5974
453	5969	5969	5987	5990
454	5983	5983	6004	6004
455	5991	5991	6011	6011
456	6007	6007	6048	6048
457	6011	6011	6057	6057
458	6048	6048	6088	6062
459	6062	6062	6094	6094
460	6089	6089	6102	6102
461	6094	6094	6113	6113
462	6102	6102	6140	6140
463	6113	6113	6157	6157
464	6140	6140	6164	6164
465	6158	6158	6169	6169
466	6162	6162	6189	6189
467	6169	6169	6192	6192
468	6188	6188	6219	6215
469	6192	6192	6240	6240
470	6215	6215	6247	6247
471	6240	6240	6260	6254
472	6247	6247	6269	6260
473	6260	6260	6295	6277
474	6280	6273	6309	6291
475	6295	6295	6322	6295
476	6309	6309	6327	6327
477	6313	6313	6348	6334
478	6327	6327	6356	6352
479	6331	6331	6362	6356
480	6352	6352	6367	6367
481	6356	6356	6367	6375
482	6367	6367	6375	6378
483	6374	6374	6382	6382
484	6378	6378	6387	6387
485	6382	6382	6401	6401
486	6387	6387	6411	6411
487	6401	6401	6418	6414
488	6411	6411	6429	6429
489	6418	6418	6438	6438
490	6429	6429	6449	6449
491	6438	6438	6457	6457
492	6449	6449	6471	6471
493	6457	6457	6485	6485
494	6471	6471	6496	6496
495	6485	6485	6503	6503
496	6495	6495	6509	6509
497	6503	6503	6524	6524
498	6513	6513	6531	6531
499	6524	6524	6535	6535
500	6531	6531	6546	6546
501	6539	6539	6557	6557
502	6546	6546	6576	6576
503	6557	6557	6581	6581
504	6576	6576	6594	6594
505	6581	6581	6600	6600
506	6595	6595	6617	6617
507	6617	6616	6625	6625
508	6621	6620	6641	6641
509	6625	6625	6649	6649
510	6641	6641	6660	6660
511	6649	6649	6670	6670
512	6660	6660	6677	6677
513	6670	6670	6687	6687
514	6677	6677	6705	6705
515	6687	6687	6713	6713
516	6705	6705	6721	6721
517	6713	6713	6724	6724
518	6721	6721	6738	6732
519	6725	6725	6747	6738
520	6731	6731	6757	6757
521	6738	6738	6772	6775
522	6757	6757	6782	6782
523	6775	6775	6799	6799
524	6780	6782	6807	6803
525	6799	6799	6810	6810
526	6806	6806	6825	6819
527	6810	6810	6834	6834
528	6825	6825	6849	6849
529	6834	6834	6857	6857
530	6849	6849	6868	6861
531	6857	6857	6885	6885
532	6881	6881	6890	6890
533	6885	6885	6911	6911
534	6889	6889	6917	6917
535	6911	6911	6926	6926
536	6918	6918	6931	6935
537	6926	6926	6948	6939
538	6935	6935	6959	6959
539	6947	6947	6970	6970
540	6959	6959	6982	6982
541	6970	6970	6989	6994
542	6987	6987	7004	7004
543	6993	6993	7007	7007
544	7004	7004	7019	7019
545	7008	7008	7045	7045
546	7019	7019	7048	7052
547	7045	7045	7068	7068
548	7059	7059	7079	7084
549	7068	7068	7091	7091
550	7081	7081	7104	7104
551	7091	7091	7117	7117
552	7104	7104	7129	7129
553	7117	7117	7156	7156
554	7129	7129	7161	7161
555	7156	7156	7167	7167
556	7161	7161	7170	7170
557	7167	7167	7173	7173
558	7177	7177	7200	7200
559	7186	7186	7205	7205
560	7200	7200	7253	7253
561	7205	7205	7264	7264
562	7253	7253	7273	7273
563	7264	7264	7292	7292
564	7273	7273	7296	7296
565	7292	7292	7299	7305
566	7297	7297	7312	7312
567	7304	7304	7315	7315
568	7309	7309	7359	7318
569	7314	7314	7363	7359
570	7318	7318	7370	7370
571	7362	7362	7382	7382
572	7370	7370	7387	7387
573	7382	7382	7395	7395
574	7386	7386	7412	7412
575	7395	7395	7431	7431
576	7412	7412	7435	7435
577	7434	7434	7443	7443
578	7438	7438	7462	7462
579	7443	7443	7473	7473
580	7464	7464	7501	7485
581	7473	7473	7505	7505
582	7485	7485	7516	7516
583	7505	7505	7528	7528
584	7517	7517	7538	7538
585	7528	7528	7553	7553
586	7538	7538	7568	7568
587	7553	7553	7575	7575
588	7568	7568	7589	7583
589	7575	7575	7596	7589
590	7589	7589	7612	7596
591	7596	7596	7621	7609
592	7600	7600	7624	7633
593	7625	7625	7633	7639
594	7635	7635	7651	7651
595	7647	7643	7656	7656
596	7651	7651	7691	7661
597	7656	7656	7699	7699
598	7695	7695	7706	7706
599	7699	7699	7722	7722
600	7706	7706	7737	7737
601	7712	7712	7751	7751
602	7741	7741	7756	7756
603	7751	7751	7766	7766
604	7755	7755	7778	7778
605	7767	7767	7805	7805
606	7778	7778	7833	7833
607	7805	7805	7837	7837
608	7833	7833	7858	7858
609	7837	7837	7864	7864
610	7858	7858	7875	7875
611	7864	7864	7880	7880
612	7875	7875	7894	7894
613	7880	7880	7913	7913
614	7894	7894	7916	7916
615	7916	7916	7947	7947
616	7941	7924	7953	7953
617	7945	7945	7969	7969
618	7953	7953	7975	7975
619	7969	7969	8005	8005
620	7974	7974	8043	8008
621	8005	8005	8057	8057
622	8043	8043	8092	8072
623	8057	8057	8097	8097
624	8061	8061	8104	8104
625	8098	8098	8133	8133
626	8104	8104	8145	8145
627	8133	8133	8160	8160
628	8147	8147	8165	8165
629	8160	8160	8178	8178
630	8165	8165	8184	8184
631	8178	8178	8188	8188
632	8184	8184	8191	8191
633	8188	8188	8202	8194
634	8192	8192	8207	8219
635	8202	8202	8233	8233
636	8219	8219	8236	8236
637	8233	8233	8247	8247
638	8237	8237	8255	8255
639	8247	8247	8259	8259
640	8255	8255	8274	8274
641	8259	8259	8289	8279
642	8276	8276	8292	8292
643	8288	8288	8301	8301
644	8292	8292	8308	8308
645	8301	8301	8314	8314
646	8308	8308	8327	8327
647	8314	8314	8334	8334
648	8327	8327	8345	8345
649	8334	8334	8360	8360
650	8345	8345	8379	8379
651	8360	8360	8388	8388
652	8379	8379	8404	8407
653	8388	8388	8415	8415
654	8407	8407	8430	8430
655	8415	8415	8454	8454
656	8430	8430	8476	8476
657	8454	8454	8481	8481
658	8476	8476	8490	8490
659	8481	8481	8496	8496
660	8490	8490	8503	8503
661	8496	8496	8513	8513
662	8503	8503	8519	8519
663	8513	8513	8527	8527
664	8519	8519	8537	8534
665	8527	8527	8542	8537
666	8537	8537	8552	8542
667	8542	8542	8552	8552
668	8550	8550	8558	8558
669	8554	8554	8561	8561
670	8558	8558	8568	8565
671	8562	8562	8578	8568
672	8568	8568	8586	8578
673	8578	8578	8592	8586
674	8586	8586	8603	8592
675	8591	8591	8613	8613
676	8603	8603	8620	8620
677	8613	8613	8625	8625
678	8620	8620	8636	8636
679	8625	8625	8645	8645
680	8636	8636	8651	8651
681	8646	8646	8669	8669
682	8651	8651	8682	8682
683	8669	8669	8692	8692
684	8682	8682	8702	8695
685	8692	8692	8714	8698
686	8711	8711	8725	8702
687	8715	8715	8733	8705
688	8719	8719	8736	8733
689	8723	8723	8757	8736
690	8733	8733	8772	8742
691	8738	8738	8782	8746
692	8742	8742	8790	8753
693	8746	8747	8797	8757
694	8750	8757	8803	8761
695	8756	8768	8817	8769
696	8761	8781	8831	8772
697	8766	8798	8836	8782
698	8777	8803	8842	8790
699	8781	8822	8848	8876
700	8792	8852	8886	8886
701	8876	8876	8895	8895
702	8886	8886	8903	8903
703	8895	8895	8908	8908
704	8903	8903	8918	8918
705	8908	8908	8925	8921
706	8918	8918	8928	8925
707	8925	8925	8932	8937
708	8929	8929	8941	8941
709	8937	8937	8952	8952
710	8941	8941	8964	8959
711	8952	8952	8969	8969
712	8962	8962	8976	8976
713	8970	8970	8987	8987
714	8974	8974	8992	8992
715	8988	8988	9017	9017
716	8993	8993	9030	9030
717	9017	9017	9045	9045
718	9030	9030	9055	9049
719	9045	9045	9065	9065
720	9049	9049	9083	9083
721	9065	9065	9086	9086
722	9075	9075	9101	9101
723	9079	9079	9107	9107
724	9101	9101	9112	9112
725	9108	9108	9120	9117
726	9112	9112	9129	9129
727	9121	9121	9137	9137
728	9129	9129	9146	9146
729	9137	9137	9154	9154
730	9146	9146	9169	9169
731	9154	9154	9175	9175
732	9169	9169	9189	9189
733	9175	9175	9198	9198
734	9188	9188	9204	9204
735	9198	9198	9209	9209
736	9202	9202	9212	9212
737	9206	9206	9217	9217
738	9212	9212	9220	9220
739	9217	9217	9255	9255
740	9221	9221	9259	9259
741	9255	9255	9269	9269
742	9259	9259	9275	9275
743	9268	9268	9286	9286
744	9275	9275	9290	9290
745	9280	9280	9293	9293
746	9286	9286	9305	9296
747	9290	9290	9323	9323
748	9296	9296	9330	9330
749	9323	9323	9336	9336
750	9330	9330	9345	9345
751	9336	9336	9356	9348
752	9346	9346	9362	9362
753	9358	9358	9379	9379
754	9362	9362	9387	9387
755	9379	9379	9405	9405
756	9383	9383	9435	9435
757	9405	9405	9445	9445
758	9435	9435	9452	9452
759	9439	9439	9458	9458
760	9452	9452	9463	9463
761	9458	9458	9484	9484
762	9463	9463	9529	9529
763	9484	9484	9538	9538
764	9529	9529	9581	9545
765	9538	9538	9588	9588
766	9545	9545	9594	9594
767	9589	9589	9610	9610
768	9594	9594	9619	9619
769	9610	9610	9628	9648
770	9621	9621	9664	9664
771	9625	9625	9670	9670
772	9664	9664	9690	9675
773	9670	9670	9700	9700
774	9690	9690	9710	9710
775	9700	9700	9724	9724
776	9721	9721	9729	9729
777	9725	9725	9766	9766
778	9729	9729	9771	9771
779	9766	9766	9778	9778
780	9771	9771	9787	9787
781	9778	9778	9817	9817
782	9787	9787	9836	9836
783	9817	9817	9842	9864
784	9836	9836	9861	9869
785	9840	9840	9864	9919
786	9844	9844	9869	9931
787	9848	9848	9913	9935
788	9865	9865	9919	9939
789	9869	9869	9935	9947
790	9881	9881	9972	9952
791	9920	9920	9994	9988
792	9935	9935	9997	9994
793	9991	9991	10002	9997
794	9995	9995	10005	10002
795	9999	9999	10008	10008
796	10003	10003	10012	10012
797	10008	10008	10021	10021
798	10017	10017	10026	10026
799	10021	10021	10046	10046
800	10025	10025	10053	10053
801	10046	10046	10079	10079
802	10053	10053	10085	10085
803	10079	10079	10107	10107
804	10085	10085	10111	10111
805	10107	10107	10125	10125
806	10112	10112	10131	10131
807	10125	10125	10137	10137
808	10131	10131	10153	10153
809	10137	10137	10165	10172
810	10153	10153	10183	10183
811	10172	10172	10187	10187
812	10183	10183	10196	10196
813	10187	10187	10212	10201
814	10196	10196	10220	10212
815	10209	10209	10256	10252
816	10213	10213	10270	10270
817	10264	10264	10273	10273
818	10268	10268	10283	10283
819	10272	10272	10307	10307
820	10296	10296	10318	10318
821	10307	10307	10330	10330
822	10318	10318	10345	10345
823	10330	10330	10356	10356
824	10345	10345	10375	10375
825	10356	10356	10381	10381
826	10375	10375	10398	10398
827	10381	10381	10470	10473
828	10398	10398	10535	10535
829	10470	10470	10547	10547
830	10535	10535	10558	10558
831	10552	10552	10582	10586
832	10559	10559	10603	10590
833	10586	10586	10615	10615
834	10590	10590	10619	10619
835	10615	10615	10636	10636
836	10619	10619	10644	10644
837	10636	10636	10650	10650
838	10644	10644	10666	10666
839	10650	10650	10673	10680
840	10666	10666	10685	10685
841	10680	10680	10697	10697
842	10685	10685	10701	10701
843	10697	10697	10745	10771
844	10745	10745	10778	10778
845	10767	10767	10782	10782
846	10778	10778	10791	10791
847	10782	10782	10801	10801
848	10791	10791	10805	10805
849	10798	10798	10827	10827
850	10805	10805	10830	10830
851	10827	10827	10836	10836
852	10831	10831	10861	10861
853	10836	10836	10865	10865
854	10861	10861	10878	10878
855	10865	10865	10886	10881
856	10874	10874	10911	10911
857	10878	10878	10922	10922
858	10912	10912	10938	10938
859	10922	10922	10943	10943
860	10937	10937	10948	10948
861	10943	10943	10954	10954
862	10950	10950	10978	10978
863	10954	10954	10983	10983
864	10978	10978	10988	10988
865	10983	10983	11006	11006
866	10988	10988	11027	11027
867	11006	11006	11042	11031
868	11027	11027	11061	11061
869	11057	11042	11068	11068
870	11064	11064	11102	11102
871	11068	11068	11128	11106
872	11102	11102	11132	11132
873	11128	11128	11146	11146
874	11132	11132	11152	11152
875	11146	11146	11169	11169
876	11152	11152	11188	11173
877	11169	11169	11193	11193
878	11173	11173	11196	11196
879	11192	11192	11202	11202
880	11196	11196	11221	11221
881	11201	11201	11234	11234
882	11221	11221	11246	11246
883	11234	11234	11252	11252
884	11246	11246	11260	11260
885	11252	11252	11275	11275
886	11260	11260	11278	11278
887	11274	11274	11282	11282
888	11278	11278	11298	11286
889	11282	11282	11304	11292
890	11292	11292	11327	11327
891	11298	11298	11335	11335
892	11327	11327	11342	11342
893	11336	11336	11360	11360
894	11343	11343	11373	11363
895	11360	11360	11378	11378
896	11364	11364	11387	11387
897	11378	11378	11396	11396
898	11387	11387	11402	11402
899	11396	11396	11405	11405
900	11401	11401	11418	11418
901	11405	11405	11421	11421
902	11418	11418	11429	11429
903	11424	11424	11439	11439
904	11430	11430	11445	11445
905	11435	11435	11451	11460
906	11446	11446	11465	11465
907	11451	11451	11481	11469
908	11466	11466	11493	11493
909	11481	11481	11497	11497
910	11496	11496	11509	11515
911	11500	11500	11519	11519
912	11509	11509	11529	11529
913	11519	11519	11535	11535
914	11529	11529	11542	11542
915	11535	11535	11556	11550
916	11542	11542	11573	11556
917	11552	11552	11577	11577
918	11556	11556	11602	11602
919	11577	11577	11608	11605
920	11602	11602	11608	11608
921	11608	11608	11618	11618
922	11612	11612	11626	11626
923	11618	11618	11633	11633
924	11626	11626	11646	11639
925	11630	11630	11677	11677
926	11634	11639	11689	11680
927	11677	11677	11692	11692
928	11681	11681	11695	11695
929	11687	11687	11706	11706
930	11691	11691	11715	11715
931	11695	11695	11739	11739
932	11715	11715	11752	11752
933	11739	11739	11755	11755
934	11752	11752	11768	11768
935	11757	11757	11773	11773
936	11769	11769	11789	11789
937	11773	11773	11793	11793
938	11789	11789	11799	11799
939	11793	11793	11816	11816
940	11799	11799	11826	11826
941	11817	11817	11841	11833
942	11825	11825	11841	11841
943	11830	11830	11847	11847
944	11841	11841	11867	11867
945	11847	11847	11874	11871
946	11867	11867	11959	11893
947	11875	11875	11963	11896
948	11959	11959	11978	11978
949	11963	11963	11999	11999
950	11978	11978	12006	12009
951	11999	11999	12022	12022
952	12004	12009	12029	12029
953	12022	12022	12035	12035
954	12029	12029	12042	12042
955	12035	12035	12049	12049
956	12043	12043	12053	12053
957	12049	12049	12075	12075
958	12053	12053	12080	12080
959	12075	12075	12094	12094
960	12080	12080	12107	12107
961	12094	12094	12112	12112
962	12107	12107	12134	12119
963	12112	12112	12142	12142
964	12134	12134	12162	12162
965	12143	12143	12176	12176
966	12162	12162	12210	12181
967	12176	12176	12229	12215
968	12205	12205	12234	12234
969	12210	12210	12241	12241
970	12234	12234	12249	12249
971	12241	12241	12257	12257
972	12249	12249	12270	12270
973	12257	12257	12322	12298
974	12270	12270	12325	12322
975	12278	12278	12331	12331
976	12325	12325	12352	12352
977	12331	12331	12393	12393
978	12375	12352	12406	12406
979	12393	12393	12447	12447
980	12404	12405	12452	12452
981	12408	12411	12462	12459
982	12452	12452	12467	12462
983	12462	12462	12479	12467
984	12467	12467	12479	12479
985	12479	12479	12489	12489
986	12483	12483	12495	12495
987	12489	12489	12510	12498
988	12495	12495	12518	12504
989	12513	12513	12524	12524
990	12518	12518	12545	12528
991	12524	12524	12548	12545
992	12543	12543	12551	12551
993	12547	12547	12554	12554
994	12551	12551	12588	12580
995	12555	12555	12592	12592
996	12588	12588	12599	12599
997	12593	12593	12611	12611
998	12599	12599	12617	12617
999	12612	12612	12620	12620
1000	12616	12616	12626	12626
1001	12620	12620	12648	12648
1002	12626	12626	12652	12652
1003	12648	12648	12669	12669
1004	12655	12656	12686	12686
1005	12669	12669	12695	12695
1006	12686	12686	12700	12700
1007	12695	12695	12716	12716
1008	12700	12700	12719	12719
1009	12715	12715	12782	12777
1010	12719	12719	12782	12782
1011	12782	12782	12790	12790
1012	12786	12786	12806	12806
1013	12790	12790	12814	12814
1014	12806	12806	12820	12820
1015	12814	12814	12826	12826
1016	12820	12820	12833	12833
1017	12826	12826	12842	12837
1018	12830	12830	12853	12842
1019	12844	12843	12859	12859
1020	12855	12855	12871	12871
1021	12859	12859	12878	12878
1022	12871	12871	12883	12883
1023	12878	12878	12901	12901
1024	12883	12883	12906	12906
1025	12901	12901	12910	12910
1026	12906	12906	12915	12915
1027	12910	12910	12976	12976
1028	12915	12915	12980	12980
1029	12975	12976	12985	12985
1030	12980	12980	12990	12990
1031	12985	12985	12993	12993
1032	12991	12990	13018	13018
1033	13000	13000	13024	13024
1034	13018	13018	13031	13027
1035	13024	13024	13031	13031
1036	13031	13031	13031
1037	13041	13041	13049	13049
1038	13045	13045	13072	13072
1039	13049	13049	13075	13075
1040	13072	13072	13086	13086
1041	13076	13076	13099	13099
1042	13086	13086	13113	13104
1043	13099	13099	13116	13116
1044	13104	13104	13122	13119
1045	13114	13114	13125	13122
1046	13118	13118	13137	13137
1047	13122	13122	13142	13142
1048	13137	13137	13145	13145
1049	13142	13142	13156	13156
1050	13146	13146	13182	13160
1051	13152	13152	13188	13188
1052	13156	13156	13200	13200
1053	13188	13188	13213	13213
1054	13200	13200	13219	13219
1055	13213	13213	13236	13236
1056	13219	13219	13250	13239
1057	13236	13236	13294	13242
1058	13292	13245	13305	13294
1059	13305	13305	13331	13331
1060	13326	13326	13340	13336
1061	13331	13331	13348	13340
1062	13335	13335	13353	13353
1063	13349	13349	13370	13360
1064	13353	13353	13377	13377
1065	13357	13357	13398	13398
1066	13377	13377	13451	13451
1067	13398	13398	13461	13461
1068	13451	13451	13484	13484
1069	13461	13461	13488	13488
1070	13484	13484	13495	13500
1071	13488	13488	13511	13511
1072	13500	13500	13518	13518
1073	13511	13511	13523	13523
1074	13518	13518	13531	13531
1075	13523	13523	13535	13535
1076	13531	13531	13548	13548
1077	13536	13536	13552	13552
1078	13551	13551	13555	13555
1079	13555	13555	13573	13584
1080	13573	13573	13598	13598
1081	13582	13582	13604	13601
1082	13598	13598	13618	13618
1083	13604	13604	13621	13621
1084	13617	13617	13630	13630
1085	13621	13621	13636	13640
1086	13630	13630	13643	13643
1087	13639	13639	13658	13658
1088	13643	13643	13680	13694
1089	13658	13658	13709	13709
1090	13676	13676	13717	13717
1091	13680	13680	13722	13722
1092	13684	13684	13733	13727
1093	13718	13718	13756	13733
1094	13722	13722	13771	13765
1095	13733	13733	13775	13768
1096	13765	13767	13780	13780
1097	13771	13771	13788	13784
1098	13780	13780	13797	13797
1099	13797	13797	13811	13811
1100	13811	13811	13820	13820
1101	13816	13816	13835	13835
1102	13820	13820	13841	13841
1103	13835	13835	13847	13847
1104	13841	13841	13867	13867
1105	13848	13848	13873	13873
1106	13869	13869	13882	13882
1107	13874	13874	13886	13886
1108	13882	13882	13896	13896
1109	13892	13892	13900	13900
1110	13896	13896	13905	13905
1111	13900	13900	13909	13913
1112	13909	13909	13927	13927
1113	13913	13913	13960	13960
1114	13927	13927	13965	13965
1115	13960	13960	13969	13969
1116	13964	13964	13974	13974
1117	13969	13969	13974	13981
1118	13974	13974	13981	13999
1119	13999	13999	13984	14009
1120	14004	14004	14022	14022
1121	14009	14009	14025	14025
1122	14016	14016	14034	14034
1123	14033	14033	14042	14042
1124	14038	14038	14050	14050
1125	14042	14042	14060	14063
1126	14050	14050	14078	14069
1127	14063	14063	14081	14081
1128	14069	14069	14088	14088
1129	14081	14081	14094	14094
1130	14088	14088	14098	14098
1131	14094	14094	14109	14109
1132	14098	14098	14123	14123
1133	14113	14113	14131	14131
1134	14123	14123	14148	14135
1135	14131	14131	14153	14153
1136	14135	14135	14158	14158
1137	14153	14153	14181	14181
1138	14158	14158	14195	14195
1139	14181	14181	14204	14201
1140	14195	14195	14207	14204
1141	14200	14200	14231	14231
1142	14204	14204	14247	14247
1143	14231	14231	14252	14252
1144	14247	14247	14259	14259
1145	14252	14252	14264	14264
1146	14260	14260	14272	14272
1147	14264	14264	14288	14275
1148	14272	14272	14293	14293
1149	14288	14288	14299	14299
1150	14293	14293	14319	14319
1151	14299	14299	14324	14324
1152	14319	14319	14342	14342
1153	14324	14324	14346	14346
1154	14343	14343	14354	14354
1155	14347	14347	14366	14366
1156	14354	14354	14375	14375
1157	14366	14366	14380	14380
1158	14376	14376	14392	14392
1159	14388	14388	14397	14397
1160	14392	14392	14403	14403
1161	14396	14396	14424	14424
1162	14403	14403	14432	14429
1163	14424	14424	14440	14432
1164	14428	14428	14460	14436
1165	14432	14432	14467	14445
1166	14436	14436	14471	14471
1167	14467	14467	14476	14476
1168	14471	14471	14480	14480
1169	14476	14476	14485	14485
1170	14480	14480	14490	14490
1171	14484	14484	14507	14507
1172	14490	14490	14514	14514
1173	14508	14508	14522	14519
1174	14514	14514	14527	14527
1175	14522	14522	14534	14534
1176	14527	14527	14543	14543
1177	14534	14534	14549	14549
1178	14562	14543	14577	14577
1179	14569	14547	14591	14584
1180	14577	14577	14599	14599
1181	14591	14591	14610	14610
1182	14599	14599	14613	14613
1183	14610	14610	14623	14623
1184	14614	14614	14626	14626
1185	14619	14619	14643	14629
1186	14623	14623	14653	14653
1187	14629	14629	14708	14705
1188	14653	14653	14716	14708
1189	14704	14704	14725	14716
1190	14708	14708	14738	14738
1191	14725	14725	14763	14763
1192	14738	14738	14787	14787
1193	14763	14763	14798	14798
1194	14787	14787	14819	14819
1195	14798	14798	14849	14834
1196	14819	14819	14855	14840
1197	14849	14849	14868	14868
1198	14856	14856	14875	14875
1199	14868	14868	14889	14889
1200	14875	14875	14894	14894
1201	14889	14889	14931	14916
1202	14916	14916	14934	14934
1203	14930	14930	14942	14942
1204	14934	14934	14950	14950
1205	14942	14942	14954	14954
1206	14950	14950	14967	14967
1207	14963	14963	14974	14971
1208	14967	14967	15003	14995
1209	14995	14995	15007	15003
1210	14999	14999	15017	15014
1211	15003	15003	15022	15017
1212	15017	15017	15027	15022
1213	15039	15038	15040	15027
1214	15043	15042	15047	15040
1215	15073	15073	15081	15077
1216	15077	15077	15089	15081
1217	15081	15081	15115	15089
1218	15088	15088	15120	15120
1219	15092	15092	15127	15124
1220	15119	15119	15130	15127
1221	15123	15123	15139	15139
1222	15127	15127	15191	15184
1223	15139	15139	15195	15191
1224	15144	15144	15215	15215
1225	15190	15190	15220	15220
1226	15216	15216	15224	15224
1227	15220	15220	15231	15231
1228	15224	15224	15240	15240
1229	15231	15231	15247	15247
1230	15240	15240	15261	15261
1231	15247	15247	15279	15279
1232	15261	15261	15290	15290
1233	15279	15279	15295	15295
1234	15284	15284	15301	15301
1235	15297	15297	15310	15307
1236	15301	15301	15316	15310
1237	15306	15306	15326	15313
1238	15310	15310	15341	15326
1239	15314	15314	15371	15346
1240	15326	15326	15376	15376
1241	15350	15350	15387	15391
1242	15376	15376	15402	15402
1243	15391	15391	15413	15413
1244	15402	15402	15419	15419
1245	15414	15414	15430	15430
1246	15419	15419	15442	15442
1247	15430	15430	15445	15445
1248	15442	15442	15452	15452
1249	15447	15447	15457	15457
1250	15452	15452	15471	15471
1251	15457	15457	15477	15477
1252	15471	15471	15485	15485
1253	15477	15477	15488	15488
1254	15485	15485	15494	15491
1255	15489	15489	15512	15512
1256	15508	15508	15519	15519
1257	15512	15512	15525	15525
1258	15519	15519	15530	15530
1259	15525	15525	15536	15536
1260	15530	15530	15542	15542
1261	15537	15537	15552	15552
1262	15542	15542	15556	15556
1263	15552	15552	15573	15573
1264	15557	15557	15581	15581
1265	15573	15573	15586	15586
1266	15581	15581	15605	15591
1267	15586	15586	15615	15615
1268	15594	15594	15630	15618
1269	15615	15615	15643	15643
1270	15639	15639	15648	15648
1271	15643	15643	15651	15651
1272	15647	15647	15667	15667
1273	15651	15651	15672	15672
1274	15669	15669	15676	15676
1275	15673	15673	15691	15691
1276	15677	15677	15695	15695
1277	15691	15691	15722	15722
1278	15695	15695	15744	15744
1279	15722	15722	15751	15751
1280	15744	15744	15757	15757
1281	15751	15751	15760	15760
1282	15757	15757	15769	15769
1283	15761	15761	15791	15774
1284	15769	15769	15801	15801
1285	15795	15795	15811	15811
1286	15801	15801	15817	15817
1287	15811	15811	15820	15820
1288	15817	15817	15829	15829
1289	15825	15825	15870	15870
1290	15829	15829	15894	15883
1291	15870	15870	15904	15904
1292	15894	15894	15922	15922
1293	15904	15904	15925	15925
1294	15923	15923	15954	15954
1295	15927	15927	15962	15962
1296	15954	15954	15989	15989
1297	15962	15962	15998	15998
1298	15989	15989	16018	16018
1299	15998	15998	16029	16022
1300	16018	16018	16035	16029
1301	16022	16022	16042	16035
1302	16035	16035	16046	16042
1303	16042	16042	16051	16046
1304	16046	16046	16095	16069
1305	16050	16051	16102	16102
1306	16069	16069	16107	16107
1307	16102	16102	16118	16118
1308	16107	16107	16124	16124
1309	16116	16116	16128	16128
1310	16120	16120	16150	16150
1311	16124	16124	16154	16154
1312	16151	16151	16161	16161
1313	16155	16155	16172	16172
1314	16160	16160	16178	16178
1315	16172	16172	16184	16184
1316	16180	16180	16192	16192
1317	16184	16184	16218	16218
1318	16193	16193	16226	16226
1319	16218	16218	16239	16234
1320	16226	16226	16259	16239
1321	16234	16234	16264	16259
1322	16239	16239	16268	16264
1323	16261	16261	16275	16268
1324	16265	16265	16314	16275
1325	16269	16269	16324	16278
1326	16275	16275	16353	16353
1327	16314	16314	16360	16360
1328	16318	16318	16368	16368
1329	16361	16361	16374	16374
1330	16368	16368	16378	16378
1331	16372	16372	16381	16381
1332	16376	16376	16385	16412
1333	16398	16398	16398	16422
1334	16422	16422	16405	16427
1335	16426	16426	16476	16454
1336	16442	16442	16500	16500
1337	16475	16475	16516	16516
1338	16511	16511	16521	16521
1339	16516	16516	16528	16528
1340	16521	16521	16535	16535
1341	16528	16528	16538	16538
1342	16535	16535	16615	16615
1343	16539	16539	16648	16648
1344	16615	16615	16662	16658
1345	16648	16648	16741	16662
1346	16662	16662	16744	16744
1347	16744	16744	16767	16767
1348	16748	16748	16780	16780
1349	16767	16767	16788	16788
1350	16780	16780	16794	16794
1351	16784	16784	16805	16805
1352	16794	16794	16810	16810
1353	16805	16805	16818	16818
1354	16810	16810	16828	16828
1355	16818	16818	16838	16838
1356	16828	16828	16849	16849
1357	16838	16838	16858	16858
1358	16849	16849	16870	16870
1359	16858	16858	16897	16897
1360	16871	16871	16916	16916
1361	16897	16897	16953	16965
1362	16916	16916	16992	16992
1363	16965	16965	17001	17001
1364	16992	16992	17021	17021
1365	17000	17001	17054	17054
1366	17021	17021	17070	17070
1367	17054	17054	17093	17093
1368	17069	17069	17102	17102
1369	17093	17093	17124	17127
1370	17102	17102	17156	17162
1371	17127	17127	17171	17171
1372	17152	17152	17195	17195
1373	17156	17156	17209	17209
1374	17195	17195	17214	17214
1375	17208	17208	17224	17224
1376	17212	17212	17234	17234
1377	17223	17223	17246	17246
1378	17231	17231	17259	17259
1379	17246	17246	17265	17269
1380	17259	17259	17277	17277
1381	17268	17268	17285	17285
1382	17277	17277	17300	17300
1383	17285	17285	17306	17306
1384	17300	17300	17312	17315
1385	17307	17307	17320	17320
1386	17311	17311	17329	17329
1387	17320	17320	17335	17335
1388	17329	17329	17359	17359
1389	17335	17335	17362	17362
1390	17358	17358	17365	17365
1391	17362	17362	17369	17369
1392	17366	17366	17376	17376
1393	17370	17370	17383	17383
1394	17376	17376	17387	17387
1395	17383	17383	17395	17395
1396	17387	17387	17399	17399
1397	17395	17395	17402	17402
1398	17399	17399	17405	17405
1399	17403	17403	17411	17411
1400	17407	17407	17414	17414
1401	17411	17411	17421	17421
1402	17416	17416	17430	17430
1403	17420	17420	17437	17437
1404	17430	17430	17440	17440
1405	17437	17437	17463	17463
1406	17441	17441	17468	17468
1407	17463	17463	17473	17473
1408	17469	17469	17481	17481
1409	17473	17473	17491	17491
1410	17481	17481	17520	17520
1411	17491	17491	17528	17531
1412	17520	17520	17543	17543
1413	17525	17525	17565	17568
1414	17543	17543	17597	17597
1415	17565	17565	17607	17610
1416	17598	17598	17615	17615
1417	17608	17608	17620	17620
1418	17615	17615	17625	17625
1419	17620	17620	17629	17629
1420	17625	17625	17636	17636
1421	17629	17629	17639	17639
1422	17633	17633	17646	17646
1423	17642	17642	17657	17657
1424	17646	17646	17671	17666
1425	17658	17658	17679	17679
1426	17669	17669	17696	17684
1427	17679	17679	17704	17704
1428	17697	17697	17716	17716
1429	17704	17704	17766	17766
1430	17716	17716	17774	17774
1431	17766	17766	17778	17778
1432	17774	17774	17791	17791
1433	17778	17778	17797	17797
1434	17791	17791	17815	17815
1435	17797	17797	17824	17824
1436	17815	17815	17829	17829
1437	17819	17819	17845	17845
1438	17829	17829	17851	17851
1439	17845	17845	17862	17862
1440	17858	17858	17874	17874
1441	17862	17862	17880	17880
1442	17874	17874	17905	17905
1443	17880	17880	17910	17910
1444	17905	17905	17934	17934
1445	17910	17910	17949	17949
1446	17934	17934	17952	17952
1447	17948	17948	17977	17971
1448	17952	17952	17982	17977
1449	17956	17956	17992	17992
1450	17982	17982	17996	17996
1451	17992	17992	18029	18029
1452	17996	17996	18044	18044
1453	18029	18029	18047	18047
1454	18043	18043	18070	18070
1455	18047	18047	18078	18078
1456	18073	18073	18083	18083
1457	18078	18078	18099	18099
1458	18084	18084	18104	18104
1459	18099	18099	18122	18122
1460	18104	18104	18125	18132
1461	18122	18122	18140	18140
1462	18126	18126	18154	18154
1463	18140	18140	18170	18162
1464	18154	18154	18175	18175
1465	18162	18162	18180	18180
1466	18175	18175	18183	18183
1467	18180	18180	18203	18203
1468	18191	18191	18230	18230
1469	18203	18203	18241	18241
1470	18230	18230	18246	18246
1471	18241	18241	18253	18253
1472	18246	18246	18259	18259
1473	18253	18253	18264	18264
1474	18259	18259	18269	18272
1475	18264	18264	18278	18278
1476	18272	18272	18285	18285
1477	18278	18278	18309	18309
1478	18285	18285	18320	18320
1479	18315	18309	18333	18333
1480	18320	18320	18347	18347
1481	18333	18333	18353	18353
1482	18347	18347	18361	18361
1483	18354	18354	18369	18369
1484	18361	18361	18372	18378
1485	18369	18369	18390	18390
1486	18378	18378	18397	18397
1487	18390	18390	18403	18403
1488	18397	18397	18417	18411
1489	18403	18403	18433	18421
1490	18417	18417	18433	18433
1491	18431	18421	18440	18440
1492	18435	18435	18444	18444
1493	18440	18440	18450	18450
1494	18444	18444	18460	18460
1495	18450	18450	18465	18465
1496	18457	18457	18469	18469
1497	18461	18461	18477	18477
1498	18465	18465	18488	18483
1499	18469	18469	18493	18488
1500	18483	18483	18502	18509
1501	18488	18488	18514	18514
1502	18507	18507	18528	18528
1503	18511	18511	18578	18578
1504	18528	18528	18591	18591
1505	18577	18577	18602	18602
1506	18591	18591	18609	18609
1507	18602	18602	18612	18612
1508	18609	18609	18627	18618
1509	18627	18627	18649	18627
1510	18637	18637	18652	18652
1511	18641	18641	18670	18670
1512	18652	18652	18678	18678
1513	18670	18670	18695	18684
1514	18678	18678	18701	18701
1515	18696	18696	18719	18719
1516	18701	18701	18731	18724
1517	18719	18719	18747	18747
1518	18731	18731	18782	18778
1519	18747	18747	18789	18782
1520	18780	18780	18801	18801
1521	18784	18784	18813	18813
1522	18801	18801	18817	18817
1523	18813	18813	18823	18823
1524	18817	18817	18833	18833
1525	18823	18823	18848	18842
1526	18833	18833	18855	18855
1527	18850	18850	18874	18874
1528	18855	18855	18885	18885
1529	18874	18874	18894	18894
1530	18888	18888	18899	18899
1531	18893	18893	18905	18905
1532	18899	18899	18908	18911
1533	18905	18905	18918	18918
1534	18911	18911	18929	18929
1535	18918	18918	18970	18970
1536	18931	18931	18973	18973
1537	18969	18969	18987	18987
1538	18973	18973	18995	18995
1539	18987	18987	19074	19065
1540	18994	18994	19074	19070
1541	19006	19006	19077	19074
1542	19018	19018	19082	19077
1543	19074	19074	19100	19082
1544	19082	19082	19113	19089
1545	19086	19099	19129	19129
1546	19125	19125	19137	19137
1547	19129	19129	19144	19140
1548	19133	19133	19165	19155
1549	19147	19147	19170	19162
1550	19155	19155	19177	19170
1551	19159	19159	19202	19202
1552	19170	19170	19233	19233
1553	19202	19202	19244	19244
1554	19233	19233	19255	19255
1555	19244	19244	19258	19258
1556	19255	19255	19295	19295
1557	19259	19259	19312	19312
1558	19296	19296	19319	19319
1559	19312	19312	19324	19324
1560	19319	19319	19330	19330
1561	19324	19324	19342	19342
1562	19330	19330	19350	19350
1563	19342	19342	19354	19354
1564	19350	19350	19364	19364
1565	19354	19354	19373	19373
1566	19364	19364	19425	19425
1567	19374	19374	19431	19428
1568	19425	19425	19434	19431
1569	19431	19431	19447	19447
1570	19435	19435	19455	19455
1571	19447	19447	19468	19468
1572	19455	19455	19473	19473
1573	19468	19468	19479	19479
1574	19473	19473	19484	19484
1575	19479	19479	19516	19490
1576	19484	19484	19525	19525
1577	19520	19520	19530	19530
1578	19525	19525	19535	19535
1579	19529	19529	19538	19538
1580	19535	19535	19562	19565
1581	19539	19539	19573	19573
1582	19565	19565	19578	19578
1583	19573	19573	19582	19582
1584	19578	19578	19593	19593
1585	19582	19582	19612	19612
1586	19593	19593	19621	19621
1587	19614	19614	19630	19630
1588	19621	19621	19634	19638
1589	19630	19630	19658	19658
1590	19636	19636	19671	19674
1591	19658	19658	19682	19682
1592	19674	19674	19692	19692
1593	19682	19682	19701	19701
1594	19692	19692	19707	19707
1595	19698	19698	19711	19711
1596	19707	19707	19729	19726
1597	19711	19711	19734	19729
1598	19729	19729	19837	19734
1599	19733	19733	19856	19837
1600	19837	19837	19865	19856
1601	19856	19856	19868	19865
1602	19864	19864	19875	19875
1603	19868	19868	19878	19878
1604	19874	19874	19895	19895
1605	19878	19878	19906	19906
1606	19895	19895	19925	19918
1607	19906	19906	19939	19939
1608	19925	19925	19942	19942
1609	19939	19939	19951	19951
1610	19943	19943	19972	19968
1611	19951	19951	19988	19972
1612	19972	19972	19988	19988
1613	19976	19976	19993	19993
1614	19988	19988	20013	20013
1615	19992	19992	20025	20019
1616	20013	20013	20031	20035
1617	20017	20017	20047	20041
1618	20035	20035	20069	20069
1619	20043	20043	20077	20077
1620	20069	20069	20085	20085
1621	20077	20077	20089	20089
1622	20085	20085	20111	20111
1623	20089	20089	20116	20116
1624	20111	20111	20121	20121
1625	20116	20116	20126	20126
1626	20124	20124	20145	20145
1627	20128	20128	20155	20151
1628	20145	20145	20164	20164
1629	20151	20155	20171	20171
1630	20164	20164	20177	20177
1631	20171	20171	20181	20181
1632	20177	20177	20189	20189
1633	20181	20181	20197	20197
1634	20189	20189	20201	20201
1635	20194	20194	20219	20205
1636	20198	20198	20223	20219
1637	20202	20202	20241	20223
1638	20228	20228	20244	20228
1639	20241	20241	20253	20241
1640	20250	20250	20268	20268
1641	20254	20254	20281	20281
1642	20268	20268	20296	20296
1643	20281	20281	20300	20300
1644	20296	20296	20303	20303
1645	20300	20300	20330	20334
1646	20304	20304	20339	20339
1647	20321	20321	20351	20351
1648	20330	20330	20357	20357
1649	20351	20351	20370	20370
1650	20357	20357	20374	20374
1651	20370	20370	20377	20386
1652	20374	20374	20407	20407
1653	20406	20406	20425	20425
1654	20410	20410	20441	20441
1655	20425	20425	20451	20451
1656	20438	20438	20467	20460
1657	20451	20451	20476	20476
1658	20467	20467	20479	20479
1659	20476	20476	20492	20492
1660	20480	20480	20499	20499
1661	20492	20492	20507	20507
1662	20499	20499	20530	20530
1663	20504	20504	20550	20550
1664	20530	20530	20569	20569
1665	20555	20555	20582	20582
1666	20569	20569	20598	20598
1667	20582	20582	20601	20601
1668	20597	20597	20608	20608
1669	20601	20601	20633	20612
1670	20608	20608	20653	20653
1671	20636	20636	20657	20657
1672	20653	20653	20684	20684
1673	20657	20657	20703	20703
1674	20684	20684	20706	20706
1675	20703	20703	20712	20712
1676	20707	20707	20716	20716
1677	20712	20712	20725	20725
1678	20719	20716	20731	20731
1679	20725	20725	20740	20740
1680	20731	20731	20771	20771
1681	20735	20735	20777	20777
1682	20771	20771	20781	20781
1683	20777	20777	20789	20789
1684	20781	20781	20798	20798
1685	20789	20789	20816	20816
1686	20798	20798	20842	20842
1687	20816	20816	20860	20860
1688	20842	20842	20880	20880
1689	20860	20860	20892	20892
1690	20880	20880	20902	20902
1691	20892	20892	20909	20909
1692	20902	20902	20912	20912
1693	20909	20909	20917	20917
1694	20912	20912	20934	20934
1695	20917	20917	20940	20940
1696	20935	20935	20954	20954
1697	20940	20940	20960	20960
1698	20955	20955	20969	20969
1699	20960	20960	20978	20982
1700	20969	20969	20992	20992
1701	20982	20982	20998	20998
1702	20992	20992	21027	21027
1703	20997	20997	21041	21041
1704	21027	21027	21049	21049
1705	21041	21041	21053	21053
1706	21049	21049	21127	21057
1707	21053	21053	21137	21137
1708	21134	21134	21147	21144
1709	21138	21138	21161	21161
1710	21157	21157	21179	21179
1711	21161	21161	21193	21193
1712	21179	21179	21202	21202
1713	21193	21193	21211	21211
1714	21202	21202	21216	21216
1715	21211	21211	21230	21230
1716	21216	21216	21233	21233
1717	21229	21229	21236	21236
1718	21233	21233	21240	21240
1719	21237	21237	21250	21250
1720	21241	21241	21254	21254
1721	21250	21250	21266	21266
1722	21254	21254	21296	21296
1723	21266	21265	21312	21312
1724	21297	21296	21315	21315
1725	21311	21311	21323	21323
1726	21315	21315	21345	21345
1727	21323	21323	21367	21371
1728	21345	21345	21378	21378
1729	21371	21371	21417	21417
1730	21378	21378	21455	21433
1731	21417	21417	21460	21460
1732	21455	21455	21472	21472
1733	21495	21495	21502	21502
1734	21499	21499	21511	21511
1735	21503	21503	21532	21532
1736	21511	21511	21548	21543
1737	21531	21532	21561	21556
1738	21542	21544	21564	21572
1739	21556	21556	21657	21575
1740	21656	21656	21664	21664
1741	21660	21660	21669	21673
1742	21664	21664	21683	21683
1743	21673	21673	21696	21696
1744	21683	21683	21704	21704
1745	21696	21696	21741	21709
1746	21704	21704	21749	21749
1747	21746	21746	21772	21772
1748	21750	21750	21777	21777
1749	21772	21772	21795	21795
1750	21778	21778	21805	21805
1751	21795	21795	21817	21809
1752	21805	21805	21824	21814
1753	21817	21817	21824	21817
1754	21824	21824	21833	21824
1755	21828	21828	21837	21833
1756	21832	21832	21852	21837
1757	21837	21837	21857	21852
1758	21841	21841	21872	21872
1759	21852	21852	21884	21884
1760	21872	21872	21894	21887
1761	21884	21884	21903	21903
1762	21893	21893	21906	21906
1763	21902	21902	21910	21910
1764	21906	21906	21915	21915
1765	21910	21910	21924	21924
1766	21915	21915	21929	21929
1767	21924	21924	21935	21935
1768	21929	21929	21942	21942
1769	21935	21935	21950	21950
1770	21944	21944	21971	21971
1771	21950	21950	21990	21990
1772	21971	21971	22000	22000
1773	21991	21991	22006	22006
1774	22000	22000	22015	22015
1775	22006	22006	22022	22022
1776	22015	22016	22028	22028
1777	22022	22022	22037	22037
1778	22029	22029	22054	22044
1779	22037	22037	22061	22061
1780	22044	22044	22064	22064
1781	22060	22060	22081	22081
1782	22064	22064	22090	22090
1783	22081	22081	22101	22101
1784	22091	22091	22108	22108
1785	22101	22101	22132	22132
1786	22108	22108	22135	22135
1787	22117	22117	22146	22146
1788	22135	22135	22156	22156
1789	22146	22146	22220	22216
1790	22156	22156	22232	22232
1791	22220	22220	22235	22235
1792	22232	22232	22252	22252
1793	22236	22236	22260	22260
1794	22252	22252	22263	22275
1795	22260	22260	22266	22278
1796	22263	22263	22270	22282
1797	22289	22289	22345	22294
1798	22293	22293	22355	22345
1799	22336	22336	22373	22373
1800	22345	22345	22379	22379
1801	22373	22373	22379	22387
1802	22379	22379	22387	22391
1803	22383	22383	22397	22397
1804	22387	22387	22403	22403
1805	22399	22399	22411	22411
1806	22403	22403	22416	22416
1807	22411	22411	22423	22423
1808	22421	22421	22438	22426
1809	22426	22426	22442	22442
1810	22442	22442	22468	22468
1811	22447	22447	22474	22474
1812	22468	22468	22502	22502
1813	22483	22476	22515	22515
1814	22502	22502	22531	22531
1815	22515	22515	22543	22543
1816	22531	22531	22553	22553
1817	22543	22543	22559	22559
1818	22553	22553	22567	22567
1819	22559	22559	22595	22595
1820	22567	22567	22612	22612
1821	22596	22596	22631	22616
1822	22613	22613	22637	22637
1823	22631	22631	22648	22648
1824	22637	22637	22653	22653
1825	22648	22648	22659	22659
1826	22653	22653	22683	22683
1827	22659	22659	22688	22688
1828	22682	22683	22696	22696
1829	22688	22688	22700	22700
1830	22696	22696	22707	22707
1831	22700	22700	22711	22711
1832	22707	22707	22720	22714
1833	22711	22711	22742	22725
1834	22715	22715	22747	22747
1835	22721	22721	22752	22752
1836	22748	22748	22764	22764
1837	22752	22752	22768	22768
1838	22764	22764	22782	22782
1839	22768	22768	22788	22788
1840	22782	22782	22797	22794
1841	22788	22788	22803	22797
1842	22793	22793	22806	22803
1843	22797	22797	22815	22815
1844	22803	22803	22819	22819
1845	22815	22815	22825	22825
1846	22819	22819	22833	22833
1847	22825	22825	22839	22839
1848	22834	22834	22844	22844
1849	22839	22839	22849	22849
1850	22844	22844	22853	22861
1851	22848	22848	22871	22868
1852	22852	22852	22874	22871
1853	22856	22856	22878	22878
1854	22871	22871	22901	22901
1855	22878	22878	22911	22911
1856	22901	22901	22952	22952
1857	22911	22911	22961	22957
1858	22953	22953	22965	22965
1859	22961	22961	22973	22973
1860	22965	22965	22987	22982
1861	22973	22973	22991	22987
1862	22997	22997	23005	23005
1863	23001	23001	23010	23010
1864	23005	23005	23014	23014
1865	23010	23010	23018	23018
1866	23014	23014	23035	23035
1867	23019	23018	23039	23039
1868	23035	23035	23065	23065
1869	23039	23039	23073	23073
1870	23065	23065	23079	23079
1871	23073	23073	23087	23103
1872	23079	23079	23114	23114
1873	23087	23087	23118	23118
1874	23114	23114	23123	23123
1875	23118	23118	23129	23129
1876	23123	23123	23139	23139
1877	23129	23129	23149	23149
1878	23139	23139	23154	23154
1879	23150	23150	23174	23168
1880	23154	23154	23183	23183
1881	23174	23174	23186	23186
1882	23183	23183	23194	23194
1883	23187	23187	23266	23266
1884	23262	23262	23281	23281
1885	23266	23266	23298	23298
1886	23281	23281	23308	23308
1887	23298	23298	23324	23324
1888	23308	23308	23327	23327
1889	23324	23324	23338	23338
1890	23328	23328	23342	23345
1891	23337	23337	23357	23357
1892	23347	23347	23366	23366
1893	23357	23357	23378	23371
1894	23366	23366	23409	23409
1895	23377	23377	23415	23415
1896	23409	23409	23420	23420
1897	23415	23415	23438	23438
1898	23420	23420	23452	23452
1899	23438	23438	23472	23472
1900	23452	23452	23485	23485
1901	23472	23472	23501	23501
1902	23485	23485	23507	23507
1903	23500	23500	23516	23516
1904	23507	23507	23519	23519
1905	23514	23514	23525	23525
1906	23518	23518	23533	23533
1907	23525	23525	23536	23539
1908	23532	23532	23564	23564
1909	23561	23561	23570	23573
1910	23565	23565	23589	23589
1911	23570	23570	23589	23598
1912	23589	23589	23589	23604
1913	23593	23593	23598	23608
1914	23597	23597	23615	23615
1915	23601	23601	23632	23632
1916	23615	23615	23637	23637
1917	23632	23632	23669	23669
1918	23637	23637	23674	23674
1919	23669	23669	23687	23687
1920	23674	23674	23703	23691
1921	23687	23687	23711	23711
1922	23707	23707	23732	23732
1923	23711	23711	23739	23739
1924	23732	23732	23749	23749
1925	23739	23739	23767	23757
1926	23749	23749	23772	23767
1927	23767	23767	23793	23793
1928	23771	23771	23799	23799
1929	23793	23793	23815	23815
1930	23799	23799	23824	23824
1931	23815	23815	23829	23829
1932	23820	23820	23833	23833
1933	23829	23829	23839	23839
1934	23833	23833	23854	23854
1935	23839	23841	23859	23859
1936	23852	23853	23863	23863
1937	23859	23859	23871	23871
1938	23863	23863	23874	23874
1939	23871	23871	23877	23877
1940	23875	23875	23881	23881
1941	23879	23879	23881	23886
1942	23882	23882	23886	23889
1943	23886	23886	23918	23918
1944	23890	23890	23926	23926
1945	23921	23921	23930	23930
1946	23926	23926	23945	23945
1947	23930	23930	23952	23952
1948	23949	23949	23991	23991
1949	23953	23953	23999	23999
1950	23991	23991	24008	24008
1951	23999	23999	24018	24018
1952	24008	24008	24025	24025
1953	24019	24019	24030	24030
1954	24025	24025	24038	24038
1955	24030	24030	24057	24057
1956	24038	24038	24070	24070
1957	24058	24058	24087	24078
1958	24070	24070	24125	24087
1959	24084	24084	24128	24125
1960	24125	24125	24143	24128
1961	24137	24137	24147	24147
1962	24141	24141	24154	24154
1963	24147	24147	24174	24174
1964	24154	24154	24183	24183
1965	24174	24174	24187	24187
1966	24183	24183	24198	24198
1967	24187	24187	24204	24204
1968	24198	24198	24233	24233
1969	24202	24202	24240	24240
1970	24233	24233	24244	24244
1971	24240	24240	24257	24257
1972	24253	24253	24267	24267
1973	24257	24257	24319	24319
1974	24267	24267	24327	24324
1975	24320	24320	24332	24327
1976	24327	24327	24349	24344
1977	24337	24337	24376	24349
1978	24349	24349	24385	24385
1979	24373	24373	24389	24389
1980	24385	24385	24399	24393
1981	24392	24392	24402	24402
1982	24398	24398	24424	24424
1983	24402	24402	24427	24427
1984	24423	24423	24438	24438
1985	24427	24427	24456	24444
1986	24438	24438	24461	24461
1987	24457	24457	24470	24470
1988	24463	24463	24486	24475
1989	24470	24470	24489	24489
1990	24484	24484	24499	24499
1991	24489	24489	24515	24515
1992	24500	24500	24544	24544
1993	24515	24515	24548	24548
1994	24544	24544	24555	24555
1995	24548	24548	24561	24561
1996	24552	24552	24580	24585
1997	24556	24556	24607	24607
1998	24560	24560	24665	24613
[truncated: 16,258 more rows]

## Sheet: Reference-to-signal example
base_index	fishnet	remora
0	820	820
1	824	824
2	828	828
3	832	832
4	836	836
5	840	840
6	844	844
7	861	861
8	865	865
9	874	874
10	878	878
11	886	886
12	901	901
13	910	910
14	914	914
15	922	922
16	941	941
17	946	946
18	954	954
19	967	967
20	974	974
21	978	978
22	982	982
23	1005	1005
24	1009	1009
25	1013	1013
26	1021	1021
27	1029	1029
28	1042	1042
29	1049	1049
30	1058	1058
31	1062	1062
32	1070	1070
33	1116	1116
34	1120	1120
35	1126	1126
36	1136	1136
37	1140	1140
38	1147	1147
39	1174	1174
40	1178	1178
41	1182	1182
42	1191	1191
43	1198	1198
44	1210	1210
45	1218	1218
46	1227	1227
47	1231	1231
48	1245	1245
49	1260	1260
50	1264	1264
51	1268	1268
52	1276	1276
53	1283	1283
54	1288	1288
55	1314	1314
56	1327	1327
57	1334	1334
58	1360	1360
59	1370	1370
60	1376	1376
61	1380	1380
62	1394	1394
63	1398	1398
64	1402	1402
65	1417	1417
66	1421	1421
67	1427	1427
68	1434	1434
69	1446	1447
70	1451	1451
71	1462	1462
72	1475	1475
73	1480	1480
74	1484	1484
75	1488	1488
76	1496	1496
77	1535	1535
78	1539	1539
79	1543	1543
80	1547	1547
81	1551	1551
82	1587	1587
83	1594	1594
84	1601	1601
85	1612	1612
86	1637	1637
87	1642	1642
88	1664	1664
89	1677	1677
90	1698	1698
91	1709	1709
92	1721	1721
93	1731	1731
94	1807	1807
95	1822	1822
96	1826	1826
97	1839	1839
98	1843	1843
99	1853	1853
100	1859	1859
101	1868	1868
102	1886	1886
103	1890	1890
104	1900	1900
105	1915	1915
106	1919	1919
107	1923	1923
108	1938	1938
109	1944	1944
110	1962	1962
111	1966	1966
112	1995	1995
113	2012	2012
114	2026	2026
115	2093	2093
116	2097	2097
117	2102	2102
118	2118	2118
119	2130	2130
120	2136	2136
121	2145	2145
122	2149	2149
123	2157	2157
124	2161	2161
125	2181	2181
126	2205	2205
127	2209	2209
128	2215	2215
129	2233	2233
130	2248	2248
131	2252	2252
132	2260	2260
133	2268	2268
134	2287	2287
135	2293	2293
136	2297	2297
137	2327	2327
138	2332	2332
139	2342	2342
140	2357	2357
141	2401	2401
142	2406	2406
143	2417	2417
144	2424	2424
145	2439	2439
146	2451	2451
147	2469	2469
148	2500	2500
149	2520	2520
150	2534	2534
151	2538	2538
152	2542	2542
153	2552	2552
154	2561	2561
155	2565	2565
156	2571	2571
157	2582	2582
158	2595	2595
159	2600	2600
160	2610	2610
161	2624	2624
162	2628	2628
163	2654	2654
164	2659	2659
165	2663	2663
166	2674	2674
167	2719	2719
168	2723	2723
169	2733	2733
170	2760	2760
171	2764	2764
172	2784	2784
173	2788	2788
174	2796	2796
175	2806	2806
176	2810	2810
177	2815	2815
178	2820	2820
179	2827	2827
180	2835	2835
181	2849	2849
182	2856	2856
183	2863	2863
184	2870	2870
185	2875	2875
186	2886	2886
187	2893	2893
188	2904	2904
189	2911	2911
190	2915	2915
191	2919	2919
192	2923	2923
193	2992	2992
194	3008	3008
195	3020	3020
196	3024	3024
197	3029	3029
198	3035	3035
199	3039	3039
200	3043	3043
201	3047	3057
202	3070	3070
203	3080	3080
204	3090	3090
205	3103	3103
206	3119	3119
207	3144	3144
208	3148	3148
209	3153	3153
210	3159	3159
211	3173	3173
212	3179	3179
213	3190	3190
214	3202	3202
215	3205	3205
216	3245	3245
217	3265	3265
218	3276	3276
219	3296	3296
220	3310	3310
221	3314	3314
222	3318	3318
223	3322	3322
224	3331	3331
225	3344	3344
226	3361	3362
227	3367	3367
228	3385	3385
229	3389	3389
230	3412	3412
231	3421	3421
232	3449	3449
233	3455	3455
234	3459	3459
235	3463	3463
236	3474	3474
237	3491	3491
238	3496	3496
239	3516	3516
240	3520	3520
241	3525	3525
242	3532	3532
243	3537	3537
244	3547	3547
245	3551	3551
246	3584	3584
247	3588	3588
248	3596	3596
249	3601	3601
250	3605	3605
251	3657	3640
252	3675	3675
253	3684	3684
254	3702	3702
255	3713	3713
256	3726	3726
257	3731	3731
258	3749	3749
259	3754	3754
260	3758	3758
261	3778	3778
262	3820	3820
263	3825	3825
264	3830	3830
265	3843	3843
266	3892	3892
267	3896	3896
268	3910	3910
269	3917	3917
270	3921	3921
271	3927	3927
272	3934	3934
273	3938	3938
274	3950	3950
275	3958	3958
276	3963	3963
277	3973	3973
278	3981	3981
279	3988	3988
280	4015	4015
281	4033	4033
282	4044	4044
283	4054	4054
284	4079	4079
285	4084	4084
286	4088	4088
287	4092	4092
288	4101	4101
289	4108	4108
290	4119	4119
291	4129	4129
292	4141	4141
293	4164	4164
294	4171	4171
295	4192	4192
296	4196	4196
297	4210	4210
298	4222	4222
299	4226	4226
300	4235	4235
301	4247	4247
302	4253	4253
303	4257	4257
304	4262	4262
305	4275	4275
306	4288	4287
307	4318	4318
308	4322	4322
309	4326	4326
310	4349	4349
311	4355	4355
312	4362	4362
313	4367	4367
314	4372	4372
315	4381	4381
316	4385	4385
317	4404	4404
318	4425	4425
319	4468	4468
320	4475	4475
321	4479	4479
322	4483	4483
323	4500	4500
324	4511	4511
325	4516	4516
326	4525	4525
327	4554	4557
328	4562	4562
329	4567	4567
330	4571	4571
331	4576	4576
332	4590	4590
333	4604	4604
334	4617	4617
335	4624	4624
336	4630	4630
337	4634	4634
338	4650	4649
339	4669	4669
340	4673	4673
341	4677	4677
342	4693	4693
343	4700	4700
344	4704	4704
345	4730	4730
346	4742	4742
347	4746	4746
348	4768	4769
349	4780	4780
350	4790	4790
351	4794	4794
352	4806	4806
353	4814	4814
354	4827	4827
355	4832	4832
356	4842	4842
357	4847	4847
358	4863	4863
359	4869	4869
360	4876	4876
361	4885	4885
362	4897	4897
363	4903	4903
364	4914	4914
365	4946	4946
366	4961	4961
367	4967	4967
368	4971	4971
369	4975	4975
370	4980	4980
371	4984	4984
372	4988	4988
373	4994	4994
374	5008	5008
375	5012	5012
376	5022	5022
377	5036	5036
378	5050	5050
379	5055	5055
380	5064	5064
381	5069	5069
382	5085	5085
383	5095	5095
384	5101	5101
385	5108	5108
386	5112	5112
387	5117	5117
388	5132	5132
389	5150	5150
390	5154	5154
391	5177	5177
392	5202	5202
393	5206	5206
394	5211	5211
395	5220	5220
396	5244	5244
397	5248	5248
398	5256	5256
399	5274	5274
400	5286	5286
401	5293	5293
402	5321	5321
403	5325	5325
404	5330	5330
405	5336	5336
406	5348	5348
407	5357	5357
408	5374	5374
409	5398	5398
410	5402	5402
411	5406	5406
412	5592	5592
413	5596	5596
414	5610	5610
415	5618	5618
416	5623	5623
417	5629	5629
418	5638	5638
419	5654	5654
420	5658	5658
421	5667	5667
422	5671	5671
423	5680	5680
424	5687	5687
425	5698	5698
426	5702	5702
427	5712	5712
428	5718	5718
429	5726	5726
430	5741	5741
431	5747	5747
432	5752	5752
433	5763	5763
434	5768	5768
435	5776	5776
436	5812	5812
437	5827	5827
438	5834	5834
439	5844	5844
440	5848	5848
441	5852	5852
442	5861	5861
443	5870	5870
444	5878	5878
445	5885	5885
446	5889	5889
447	5901	5901
448	5909	5909
449	5913	5913
450	5942	5942
451	5952	5952
452	5969	5969
453	5983	5983
454	5991	5991
455	6007	6007
456	6011	6011
457	6048	6048
458	6062	6062
459	6089	6089
460	6094	6094
461	6102	6102
462	6113	6113
463	6140	6140
464	6158	6158
465	6162	6162
466	6169	6169
467	6188	6188
468	6192	6192
469	6215	6215
470	6240	6240
471	6247	6247
472	6260	6260
473	6274	6273
474	6295	6295
475	6309	6309
476	6313	6313
477	6327	6327
478	6331	6331
479	6352	6352
480	6356	6356
481	6367	6367
482	6374	6374
483	6378	6378
484	6382	6382
485	6387	6387
486	6401	6401
487	6411	6411
488	6418	6418
489	6429	6429
490	6438	6438
491	6449	6449
492	6457	6457
493	6471	6471
494	6485	6485
495	6495	6495
496	6503	6503
497	6513	6513
498	6524	6524
499	6531	6531
500	6539	6539
501	6546	6546
502	6557	6557
503	6576	6576
504	6581	6581
505	6595	6595
506	6617	6616
507	6621	6620
508	6625	6625
509	6641	6641
510	6649	6649
511	6660	6660
512	6670	6670
513	6677	6677
514	6687	6687
515	6705	6705
516	6713	6713
517	6721	6721
518	6725	6725
519	6731	6731
520	6738	6738
521	6757	6757
522	6775	6775
523	6782	6782
524	6799	6799
525	6806	6806
526	6810	6810
527	6825	6825
528	6834	6834
529	6849	6849
530	6857	6857
531	6881	6881
532	6885	6885
533	6889	6889
534	6911	6911
535	6918	6918
536	6926	6926
537	6935	6935
538	6947	6947
539	6959	6959
540	6970	6970
541	6987	6987
542	6993	6993
543	7004	7004
544	7008	7008
545	7019	7019
546	7045	7045
547	7059	7059
548	7068	7068
549	7081	7081
550	7091	7091
551	7104	7104
552	7117	7117
553	7129	7129
554	7156	7156
555	7161	7161
556	7167	7167
557	7177	7177
558	7186	7186
559	7200	7200
560	7205	7205
561	7253	7253
562	7264	7264
563	7273	7273
564	7292	7292
565	7297	7297
566	7304	7304
567	7309	7309
568	7314	7314
569	7318	7318
570	7362	7362
571	7370	7370
572	7382	7382
573	7386	7386
574	7395	7395
575	7412	7412
576	7434	7434
577	7438	7438
578	7443	7443
579	7464	7464
580	7473	7473
581	7485	7485
582	7505	7505
583	7517	7517
584	7528	7528
585	7538	7538
586	7553	7553
587	7568	7568
588	7575	7575
589	7589	7589
590	7596	7596
591	7600	7600
592	7625	7625
593	7635	7635
594	7647	7643
595	7651	7651
596	7656	7656
597	7695	7694
598	7699	7699
599	7706	7706
600	7712	7712
601	7741	7741
602	7751	7751
603	7755	7755
604	7767	7767
605	7778	7778
606	7805	7805
607	7833	7833
608	7837	7837
609	7858	7858
610	7864	7864
611	7875	7875
612	7880	7880
613	7894	7894
614	7916	7916
615	7924	7924
616	7945	7945
617	7953	7953
618	7969	7969
619	7974	7974
620	8005	8005
621	8043	8043
622	8057	8057
623	8061	8061
624	8098	8098
625	8104	8104
626	8133	8133
627	8147	8147
628	8160	8160
629	8165	8165
630	8178	8178
631	8184	8184
632	8188	8188
633	8192	8192
634	8202	8202
635	8219	8219
636	8233	8233
637	8237	8237
638	8247	8247
639	8255	8255
640	8259	8259
641	8276	8276
642	8288	8288
643	8292	8292
644	8301	8301
645	8308	8308
646	8314	8314
647	8327	8327
648	8334	8334
649	8345	8345
650	8360	8360
651	8379	8379
652	8388	8388
653	8407	8407
654	8415	8415
655	8430	8430
656	8454	8454
657	8476	8476
658	8481	8481
659	8490	8490
660	8496	8496
661	8503	8503
662	8513	8513
663	8519	8519
664	8527	8527
665	8537	8537
666	8542	8542
[truncated: 17,583 more rows]
