# Supplementary material for: Fishnet simplifies and accelerates signal-to-sequence alignment in Nanopore sequencing
Source: Research Square preprint supplement (doi:10.21203/rs.3.rs-8345719/v1), 2026-01-16
Supplement: Supplementary file 1 [file 50f8de491713aa5cd15c23b4.pdf]

# Supplementary figures

## Comparing processing speed

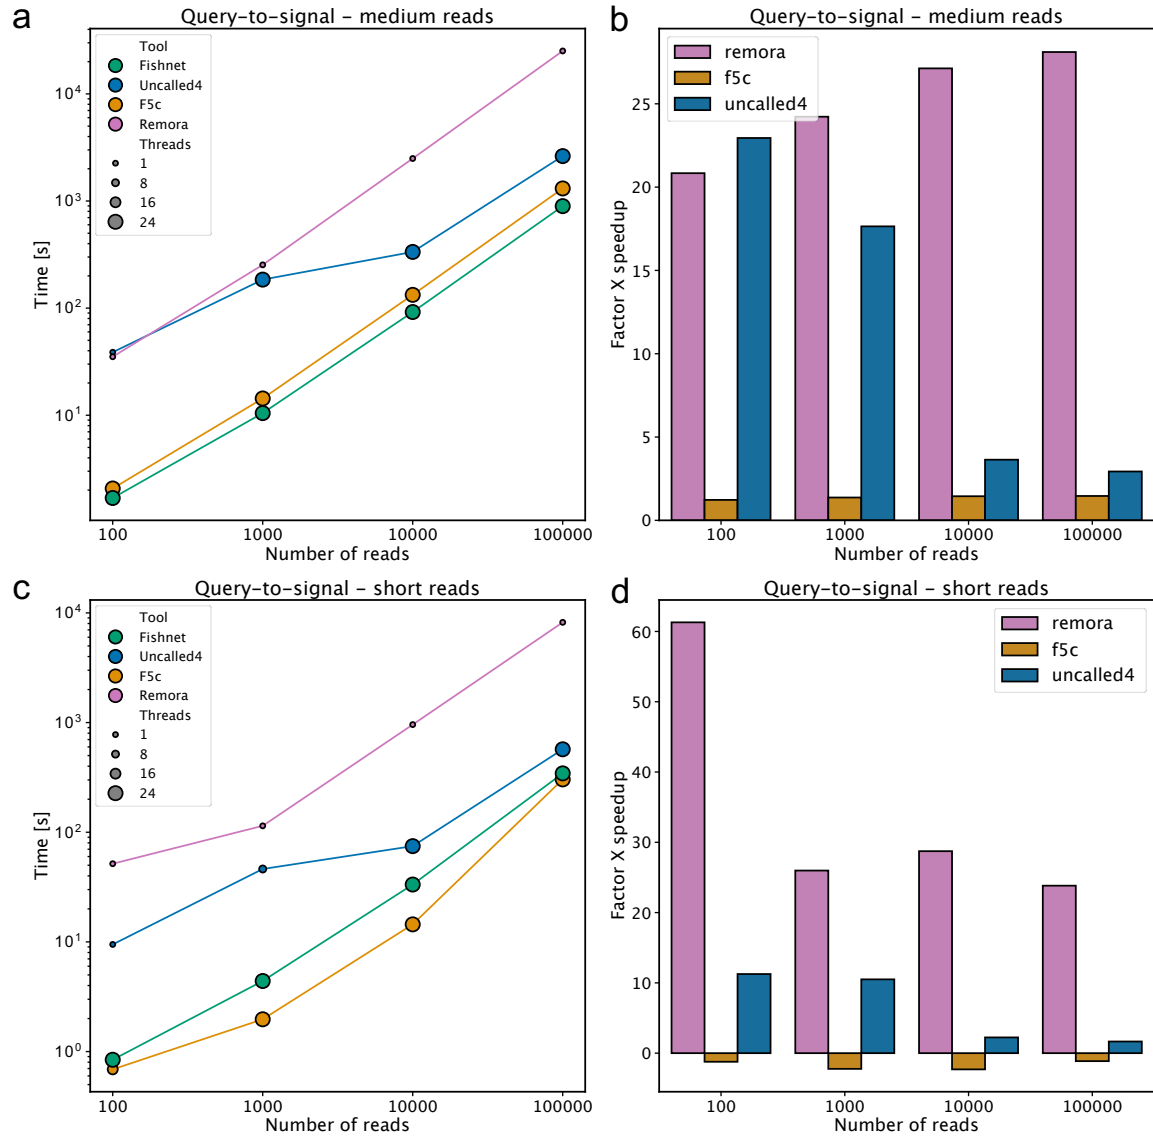

**Supplementary Figure 1** Benchmarking results for query-to-signal alignments. Measured processing times for medium (a) and short reads (c). Factor X speedup of a given tool compared to the baseline time measured by Fishnet for medium (b) and short reads (d).

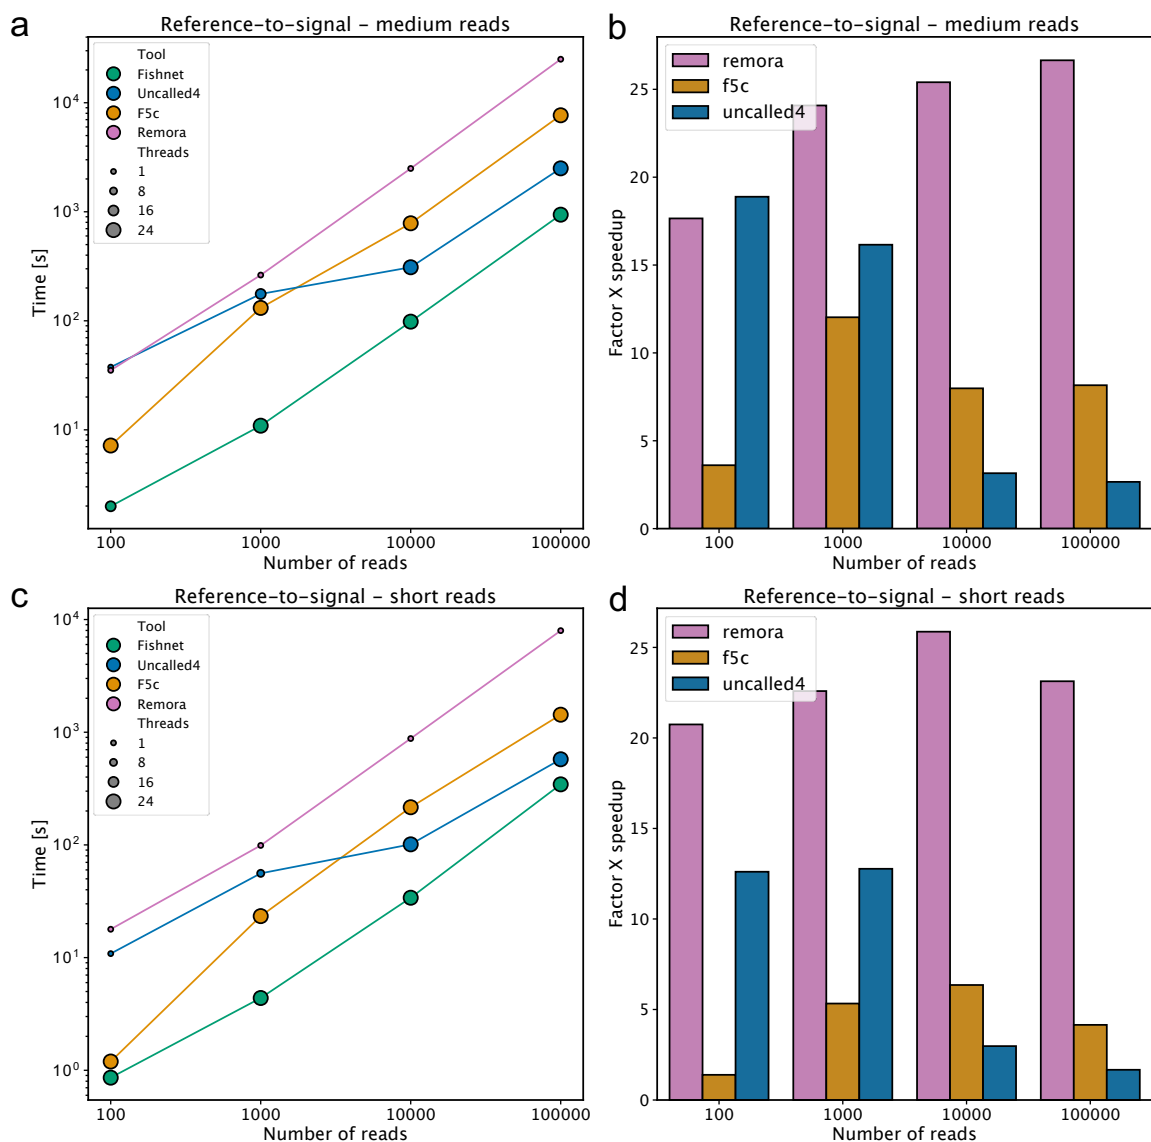

**Supplementary Figure 2** Benchmarking results for reference-to-signal alignments. Measured processing times for medium (a) and short reads (c). Factor X speedup of a given tool compared to the baseline time measured by Fishnet for medium (b) and short reads (d).



## Comparing produced alignments

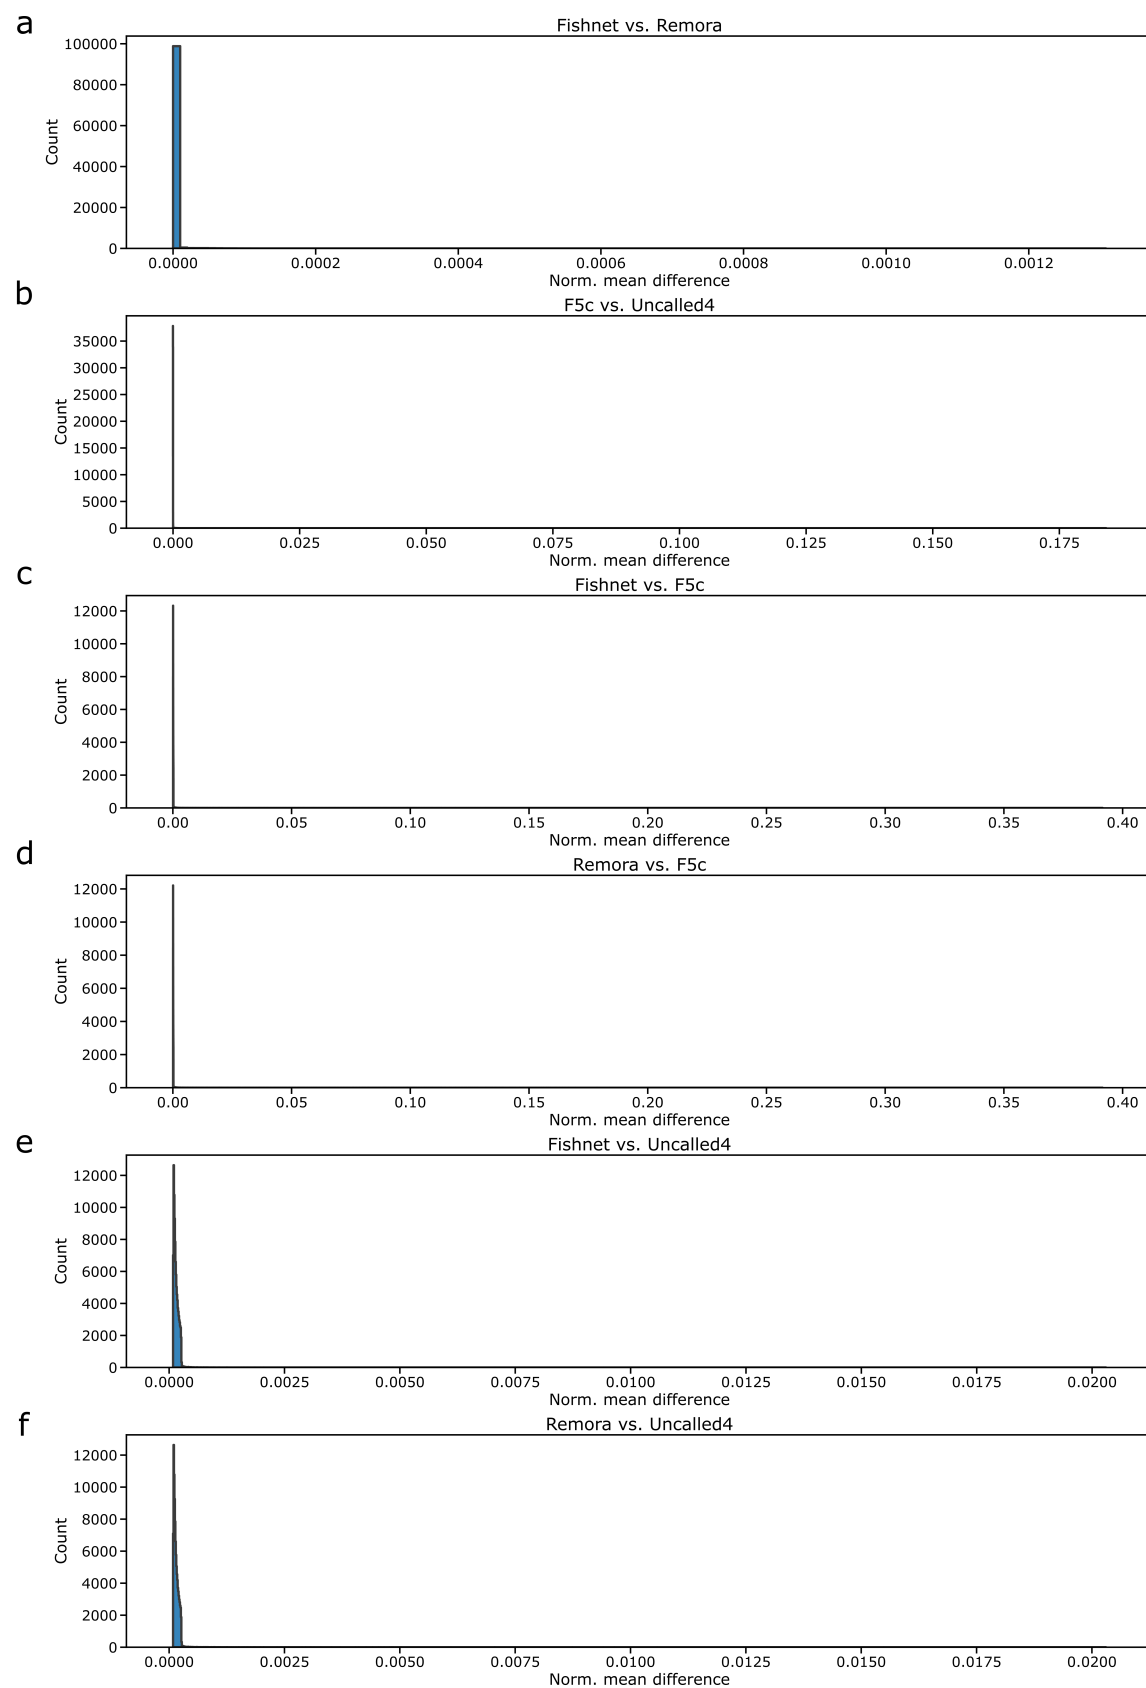

**Supplementary Figure 3** Distributions of the normalized mean difference (NMD) in the alignments for all pairwise comparisons of the four tools for query-to-signal alignments with unsplit x-axis.

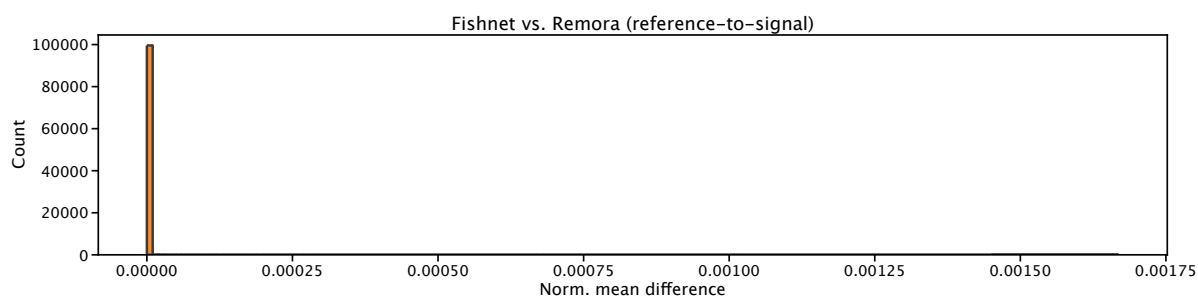

**Supplementary Figure 4** Distribution of the NMD in the reference-to-signal alignment between Fishnet and Remora with unsplit x-axis.

## Analysis of an m<sup>1</sup>A site in RNA constructs

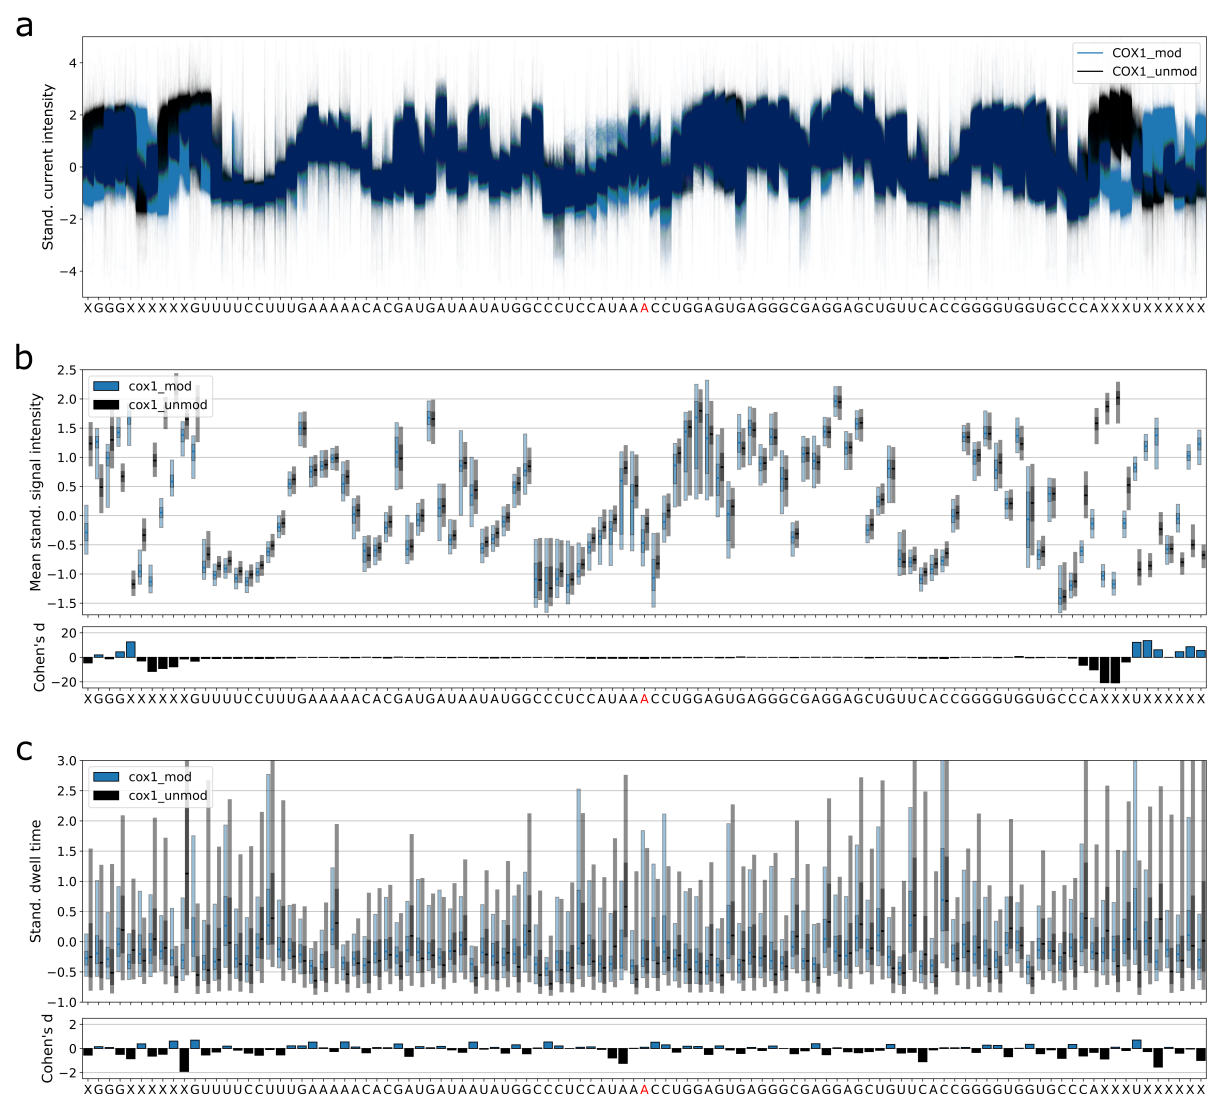

**Supplementary Figure 5** Analysis of m<sup>1</sup>A COX1 construct. The unmodified sample is shown in black in all plots. **a:** Full sequence of the oligonucleotide surrounding the central m<sup>1</sup>A/A site (shown in red). **b:** Distribution of the mean standardized signal intensity. The boundaries of the bars correspond from bottom to top to the 5<sup>th</sup> percentile, 25<sup>th</sup> percentile, median, 75<sup>th</sup> percentile and 95<sup>th</sup> percentile of the distributions. Below is the effect size (Cohen's d) of the difference between the signal intensities in the modified and unmodified samples. **c:** Distribution of standardized dwell time and the corresponding effect sizes of the differences (same structure as second row).

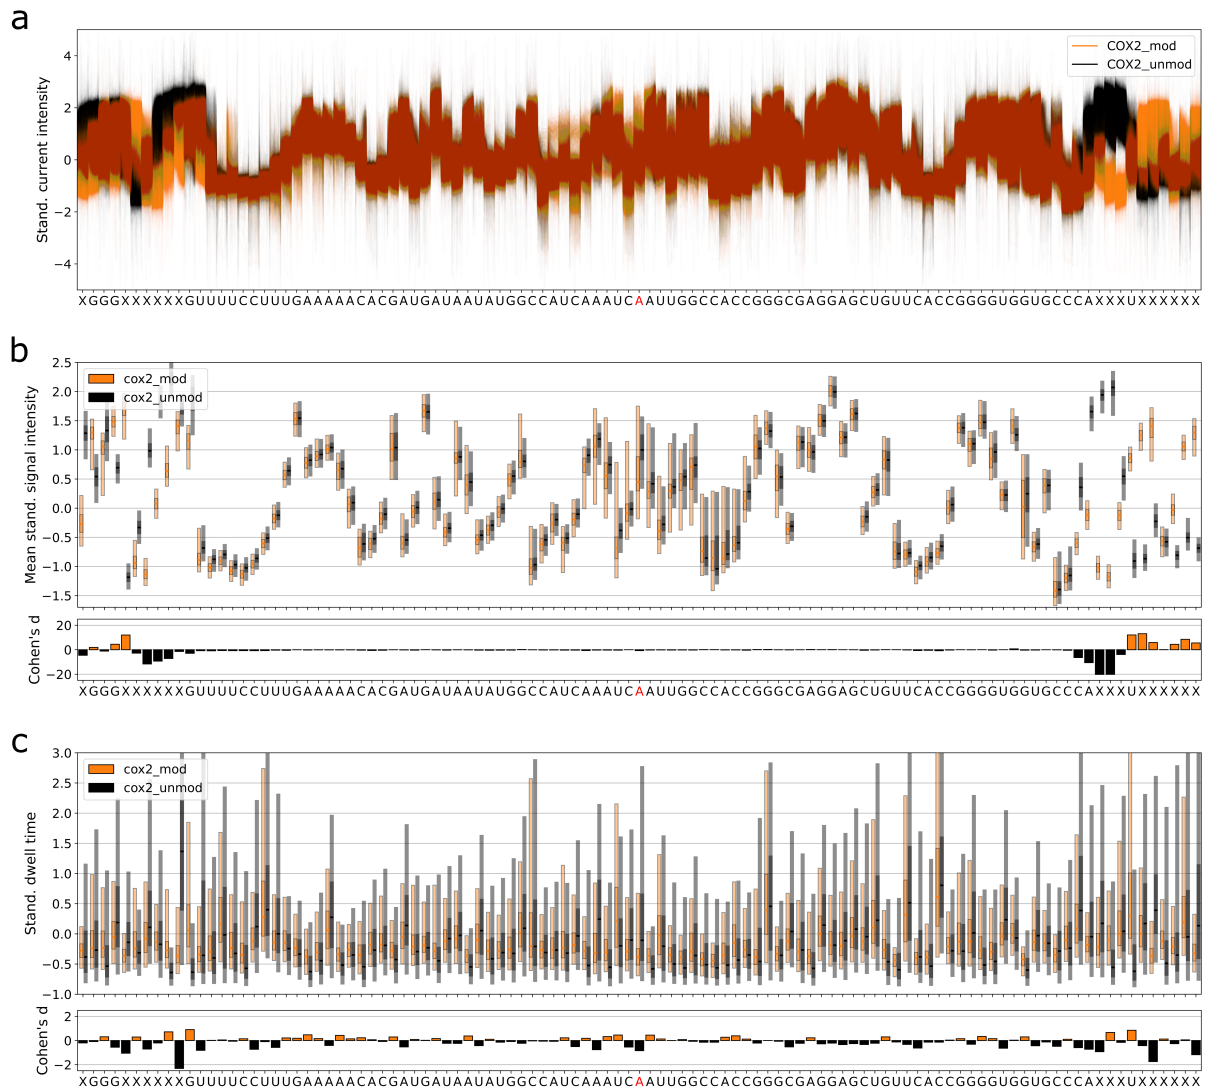

**Supplementary Figure 6** Analysis of m1A COX2 construct. The unmodified sample is shown in black in all plots. **a:** Full sequence of the oligonucleotide surrounding the central m1A/A site (shown in red). **b:** Distribution of the mean standardized signal intensity. The boundaries of the bars correspond from bottom to top to the 5<sup>th</sup> percentile, 25<sup>th</sup> percentile, median, 75<sup>th</sup> percentile and 95<sup>th</sup> percentile of the distributions. Below is the effect size (Cohen's d) of the difference between the signal intensities in the modified and unmodified samples. **c:** Distribution of standardized dwell time and the corresponding effect sizes of the differences (same structure as second row).

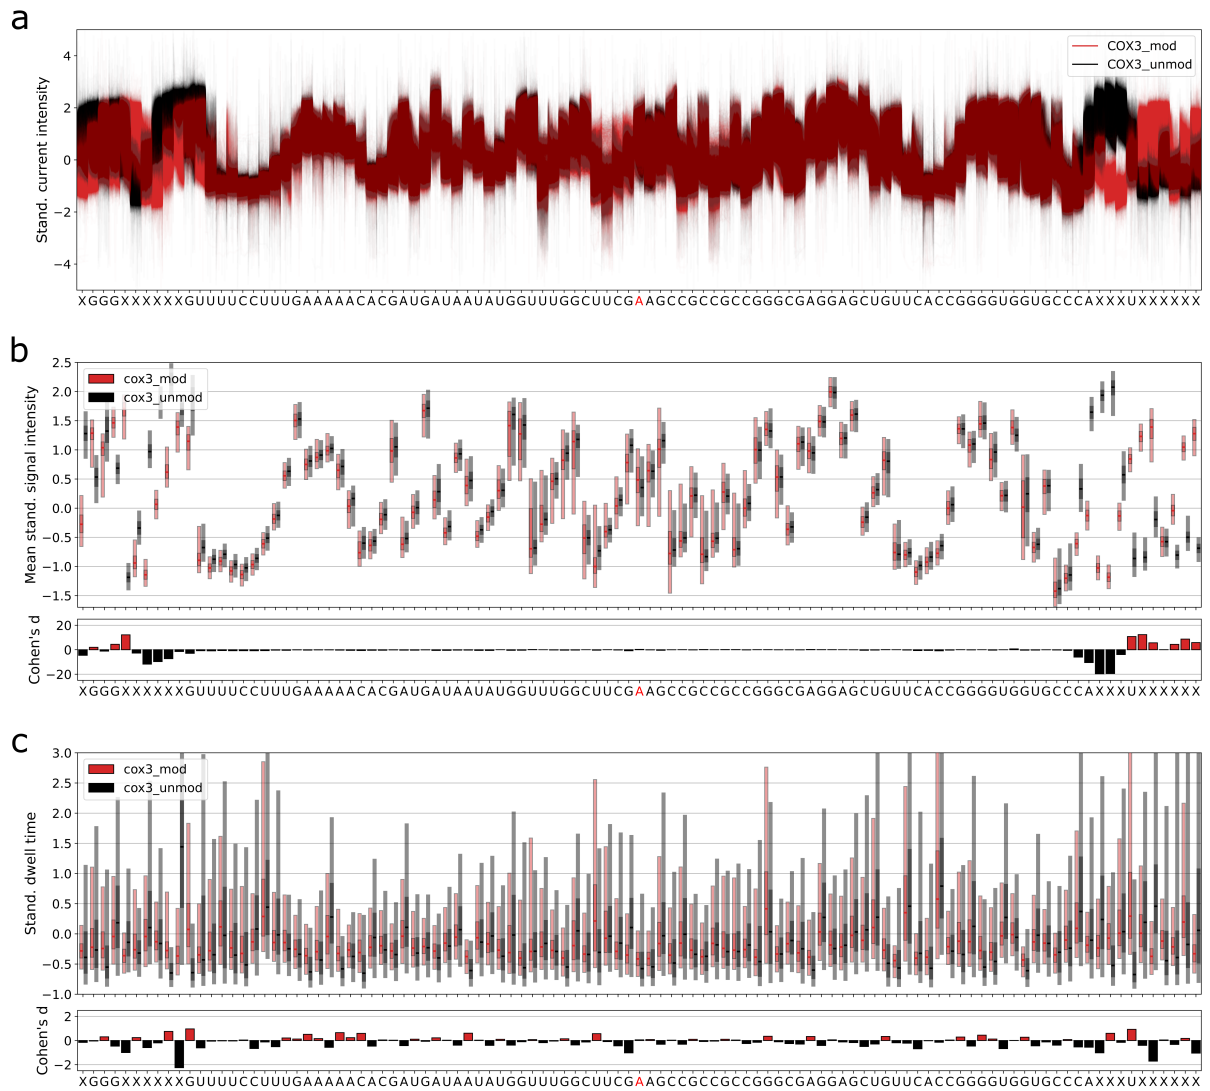

**Supplementary Figure 7** Analysis of m1A COX3 construct. The unmodified sample is shown in black in all plots. **a:** Full sequence of the oligonucleotide surrounding the central m1A/A site (shown in red). **b:** Distribution of the mean standardized signal intensity. The boundaries of the bars correspond from bottom to top to the 5<sup>th</sup> percentile, 25<sup>th</sup> percentile, median, 75<sup>th</sup> percentile and 95<sup>th</sup> percentile of the distributions. Below is the effect size (Cohen's d) of the difference between the signal intensities in the modified and unmodified samples. **c:** Distribution of standardized dwell time and the corresponding effect sizes of the differences (same structure as second row).

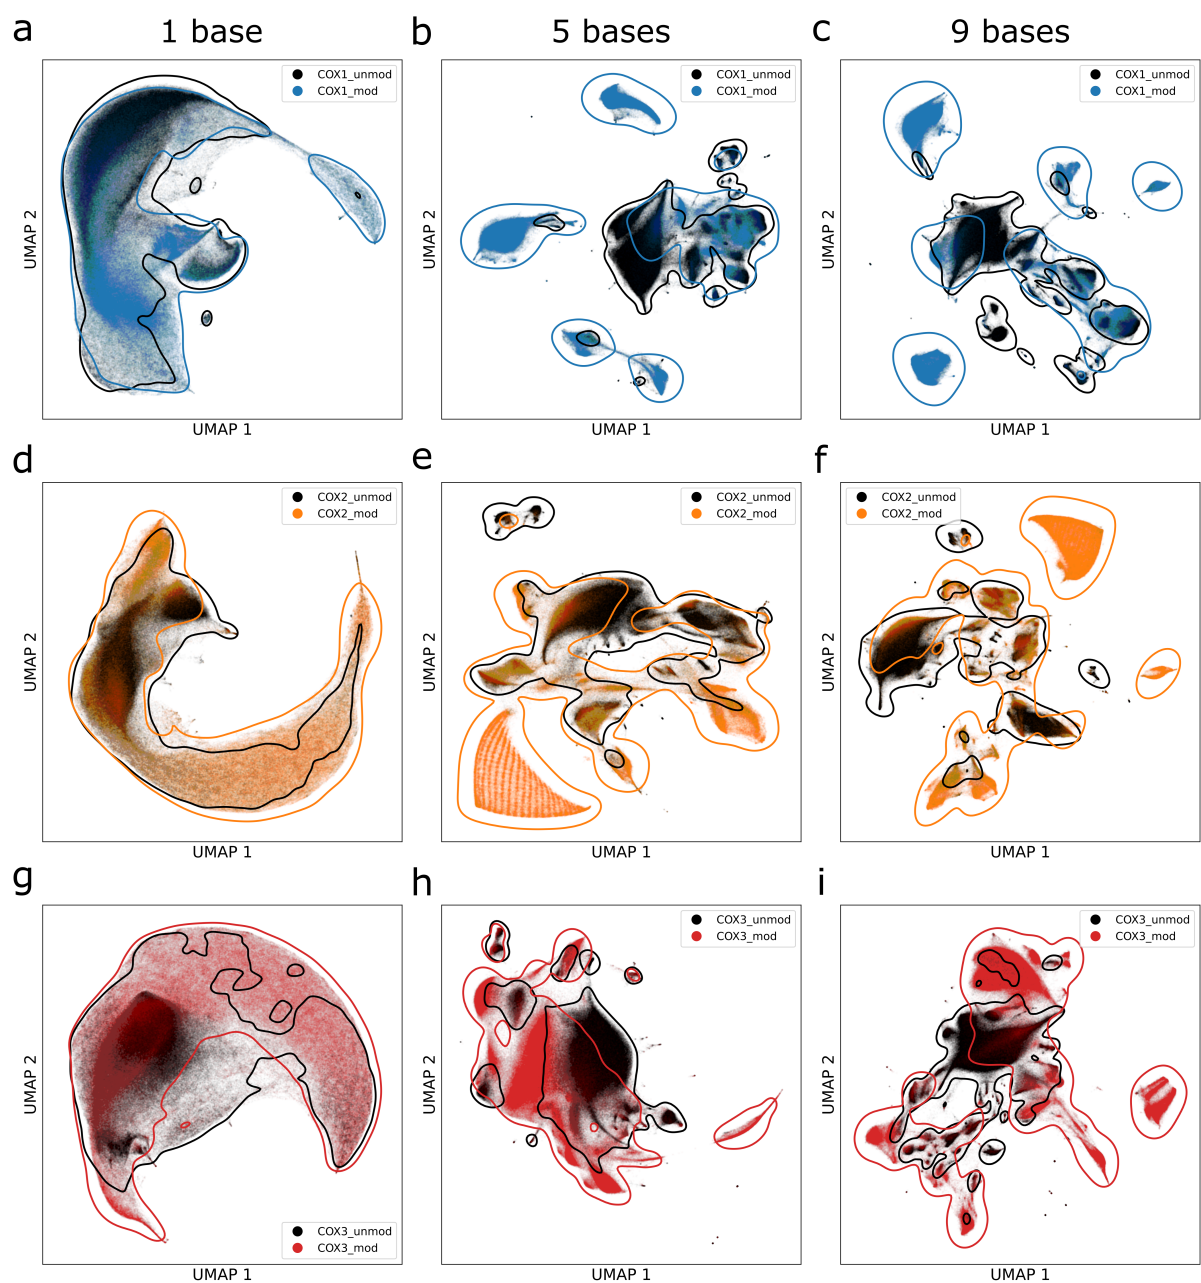

**Supplementary Figure 8** Scatterplots showing the UMAP axes on the interpolated signal data and dwell times from the central (un-)modified base (**a**, **d**, **g**). Increased amount of information by including two (**b**, **e**, **h**) and four surrounding bases (**c**, **f**, **i**).
