# Supplementary material for: Fishnet simplifies and accelerates signal-to-sequence alignment in Nanopore sequencing
Source: Research Square preprint supplement (doi:10.21203/rs.3.rs-8345719/v1), 2026-01-16
Supplement: Supplementary file 2 [file b75a29c5e8ab7279dd64fc34.xlsx]

## Sheet: Full benchmark data
tool	read_len	n_reads	alignment_type	n_threads	date	mean_time	std_time	median_time
fishnet	long	100000	query	24	2025-11-13 16:43:51	1858.33	0.229109	1858.31
fishnet	long	100000	query	16	2025-11-13 07:41:03	2127.23	2.26786	2127.61
fishnet	long	100000	query	8	2025-11-12 15:14:02	3898.96	39.3586	3883.14
fishnet	long	100000	query	1
fishnet	long	100000	reference	24	2025-11-13 18:47:54	1951.73	2.23105	1950.74
fishnet	long	100000	reference	16	2025-11-13 10:03:04	2242.03	1.44337	2242.6
fishnet	long	100000	reference	8	2025-11-12 19:33:45	4047.67	42.3257	4064.66
fishnet	long	100000	reference	1	2025-09-19 08:05:08	137961	1961.25	136979
fishnet	long	10000	query	24	2025-11-13 20:58:10	190.258	0.0149125	190.259
fishnet	long	10000	query	16	2025-11-13 12:32:42	216.512	0.713385	216.185
fishnet	long	10000	query	8	2025-11-13 00:03:52	418.961	20.8248	422.737
fishnet	long	10000	query	1	2025-08-18 09:18:13	2678.8	0.449201	2678.89
fishnet	long	10000	reference	24	2025-11-13 21:10:55	196.979	0.361864	197.17
fishnet	long	10000	reference	16	2025-11-13 12:47:11	226.057	0.474505	226.001
fishnet	long	10000	reference	8	2025-11-13 00:32:09	419.243	8.40044	415.158
fishnet	long	10000	reference	1	2025-08-18 09:18:13	13739.1	2.53462	13739.9
fishnet	long	1000	query	24	2025-11-13 21:24:06	20.1795	0.072871	20.1475
fishnet	long	1000	query	16	2025-11-13 13:02:18	22.6729	0.147323	22.6917
fishnet	long	1000	query	8	2025-11-13 01:00:02	40.1285	0.758866	39.7172
fishnet	long	1000	query	1	2025-08-18 09:18:13	252.787	0.164684	252.889
fishnet	long	1000	reference	24	2025-11-13 21:25:28	21.6184	0.293041	21.6874
fishnet	long	1000	reference	16	2025-11-13 13:03:50	23.7504	0.284002	23.6386
fishnet	long	1000	reference	8	2025-11-13 01:02:44	42.0512	0.483139	42.2078
fishnet	long	1000	reference	1	2025-08-18 09:18:13	1193.78	13.8771	1187.66
fishnet	long	100	query	24	2025-11-13 21:26:56	2.71309	0.0225649	2.70604
fishnet	long	100	query	16	2025-11-13 13:05:26	3.13749	0.0207882	3.14128
fishnet	long	100	query	8	2025-11-13 01:05:34	4.51778	0.0316648	4.51198
fishnet	long	100	query	1	2025-08-18 09:18:13	24.5034	0.0121905	24.5012
fishnet	long	100	reference	24	2025-11-13 21:27:08	2.82661	0.0885897	2.79408
fishnet	long	100	reference	16	2025-11-13 13:05:39	3.01232	0.100805	3.05971
fishnet	long	100	reference	8	2025-11-13 01:05:53	4.85042	0.0707603	4.88099
fishnet	long	100	reference	1	2025-08-18 09:18:13	109.959	0.0458241	109.982
fishnet	medium	100000	query	24	2025-11-13 21:27:20	895.73	0.356618	895.56
fishnet	medium	100000	query	16	2025-11-13 13:05:52	1031.88	2.2235	1031.93
fishnet	medium	100000	query	8	2025-11-13 01:06:13	1884.92	5.44223	1882.1
fishnet	medium	100000	query	1
fishnet	medium	100000	reference	24	2025-11-13 22:27:05	940.578	0.670536	940.584
fishnet	medium	100000	reference	16	2025-11-13 14:14:46	1090.31	1.44002	1090.17
fishnet	medium	100000	reference	8	2025-11-13 03:11:55	1982.83	46.7232	1985.59
fishnet	medium	100000	reference	1
fishnet	medium	10000	query	24	2025-11-13 23:29:53	91.9487	0.391278	91.9457
fishnet	medium	10000	query	16	2025-11-13 15:27:30	105.437	0.332325	105.318
fishnet	medium	10000	query	8	2025-11-13 05:24:10	194.028	3.80401	195.712
fishnet	medium	10000	query	1	2025-08-15 12:48:29	1281.12	1.2358	1281.62
fishnet	medium	10000	reference	24	2025-11-13 23:36:03	98.2301	1.18205	97.8726
fishnet	medium	10000	reference	16	2025-11-13 15:34:34	112.458	0.246785	112.535
fishnet	medium	10000	reference	8	2025-11-13 05:37:07	206.243	2.82815	205.54
fishnet	medium	10000	reference	1	2025-08-15 12:48:29	3234.33	1.42243	3234.96
fishnet	medium	1000	query	24	2025-11-13 23:42:37	10.4624	0.0159562	10.4667
fishnet	medium	1000	query	16	2025-11-13 15:42:05	11.8862	0.108398	11.8504
fishnet	medium	1000	query	8	2025-11-13 05:50:53	21.0086	0.930412	20.5056
fishnet	medium	1000	query	1	2025-08-15 12:48:29	127.996	0.146554	128.036
fishnet	medium	1000	reference	24	2025-11-13 23:43:20	10.9115	0.110083	10.8695
fishnet	medium	1000	reference	16	2025-11-13 15:42:54	12.2102	0.0317847	12.1955
fishnet	medium	1000	reference	8	2025-11-13 05:52:20	21.4053	0.570343	21.1941
fishnet	medium	1000	reference	1	2025-08-15 12:48:29	314.68	0.199492	314.602
fishnet	medium	100	query	24	2025-11-13 23:44:05	1.6876	0.0140003	1.68103
fishnet	medium	100	query	16	2025-11-13 15:43:44	1.82354	0.00672235	1.82338
fishnet	medium	100	query	8	2025-11-13 05:53:47	2.77951	0.127666	2.71294
fishnet	medium	100	query	1	2025-08-15 12:48:29	14.1441	0.0242947	14.1434
fishnet	medium	100	reference	24	2025-11-13 23:44:13	2.06797	0.110875	2.12009
fishnet	medium	100	reference	16	2025-11-13 15:43:52	1.98986	0.106866	1.93432
fishnet	medium	100	reference	8	2025-11-13 05:54:00	3.03748	0.0877192	3.03395
fishnet	medium	100	reference	1	2025-08-15 12:48:29	36.3452	0.220005	36.2738
fishnet	short	100000	query	24	2025-11-13 23:44:22	344.189	0.437957	343.983
fishnet	short	100000	query	16	2025-11-13 15:44:01	400.92	0.491039	400.692
fishnet	short	100000	query	8	2025-11-13 05:54:12	724.754	1.60764	723.861
fishnet	short	100000	query	1
fishnet	short	100000	reference	24	2025-11-14 00:07:20	344.643	0.411971	344.703
fishnet	short	100000	reference	16	2025-11-13 16:10:47	402.606	0.629925	402.483
fishnet	short	100000	reference	8	2025-11-13 06:42:39	729.271	2.60813	729.403
fishnet	short	100000	reference	1
fishnet	short	10000	query	24	2025-11-14 00:30:21	33.349	0.129302	33.4037
fishnet	short	10000	query	16	2025-11-13 16:37:40	38.8903	0.17865	38.8259
fishnet	short	10000	query	8	2025-11-13 07:30:12	70.0316	0.763313	69.8809
fishnet	short	10000	query	1	2025-08-08 07:42:29	185.49	0.263512	185.349
fishnet	short	10000	reference	24	2025-11-14 00:32:36	33.9805	0.0638197	33.9809
fishnet	short	10000	reference	16	2025-11-13 16:40:18	39.5015	0.147563	39.4286
fishnet	short	10000	reference	8	2025-11-13 07:34:55	71.0149	0.452389	70.7992
fishnet	short	10000	reference	1	2025-08-08 07:42:29	503.568	0.494136	503.489
fishnet	short	1000	query	24	2025-11-14 00:34:53	4.40096	0.023648	4.38927
fishnet	short	1000	query	16	2025-11-13 16:42:57	5.09367	0.12717	5.12979
fishnet	short	1000	query	8	2025-11-13 07:39:39	8.82272	0.306722	8.99939
fishnet	short	1000	query	1	2025-08-08 07:42:29	19.1748	0.0467916	19.1829
fishnet	short	1000	reference	24	2025-11-14 00:35:12	4.38017	0.00711498	4.38385
fishnet	short	1000	reference	16	2025-11-13 16:43:18	5.30588	0.110158	5.30505
fishnet	short	1000	reference	8	2025-11-13 07:40:16	8.71024	0.469143	8.45773
fishnet	short	1000	reference	1	2025-08-08 07:42:29	48.3412	0.101634	48.3164
fishnet	short	100	query	24	2025-11-14 00:35:30	0.842207	0.0156583	0.839932
fishnet	short	100	query	16	2025-11-13 16:43:41	0.94869	0.152861	0.872324
fishnet	short	100	query	8	2025-11-13 07:40:52	1.27639	0.0747738	1.27348
fishnet	short	100	query	1	2025-08-08 07:42:29	2.02046	0.0081701	2.02101
fishnet	short	100	reference	24	2025-11-14 00:35:35	0.860208	0.0130177	0.864513
fishnet	short	100	reference	16	2025-11-13 16:43:45	0.965128	0.0158359	0.957007
fishnet	short	100	reference	8	2025-11-13 07:40:58	1.12609	0.00702889	1.12723
fishnet	short	100	reference	1	2025-08-08 07:42:29	4.38336	0.0085602	4.3824
remora	long	100000	query	1	2025-11-03 16:30:00	60634.6	3679.06	60929.6
remora	long	100000	reference	1	2025-09-08 15:49:34	60419.4	4229.02	62499
remora	long	10000	query	1	2025-08-28 19:50:00	5410.83	48.3167	5391.87
remora	long	10000	reference	1	2025-08-27 07:28:46	5362.54	41.9207	5338.08
remora	long	1000	query	1	2025-08-28 19:50:00	525.302	10.5867	523.295
remora	long	1000	reference	1	2025-08-28 19:50:00	513.531	9.11961	511.762
remora	long	100	query	1	2025-08-28 19:50:00	58.386	1.32709	58.3917
remora	long	100	reference	1	2025-08-28 19:50:00	56.1326	1.24012	56.0329
remora	medium	100000	query	1	2025-11-03 16:30:00	25177.3	668.889	25553.4
remora	medium	100000	reference	1	2025-11-10 09:14:13	25068	398.827	24872.8
remora	medium	10000	query	1	2025-08-25 10:46:38	2494.27	57.4067	2480.51
remora	medium	10000	reference	1	2025-08-25 10:46:38	2495.36	39.5455	2486.89
remora	medium	1000	query	1	2025-08-25 10:46:38	253.45	1.73966	253.872
remora	medium	1000	reference	1	2025-08-25 10:46:38	262.755	18.3285	256.543
remora	medium	100	query	1	2025-08-25 10:46:38	35.163	0.930999	35.1092
remora	medium	100	reference	1	2025-08-25 10:46:38	35.127	0.38837	35.2675
remora	short	100000	query	1	2025-11-03 16:30:00	8201.79	20.4939	8195.67
remora	short	100000	reference	1	2025-11-10 09:14:13	7971.9	30.069	7965.87
remora	short	10000	query	1	2025-08-26 06:20:37	958.379	11.2197	962.881
remora	short	10000	reference	1	2025-08-08 07:42:29	879.034	11.0965	874.499
remora	short	1000	query	1	2025-08-08 07:42:29	114.346	1.49672	113.913
remora	short	1000	reference	1	2025-08-08 07:42:29	98.9436	1.43741	98.7748
remora	short	100	query	1	2025-08-08 07:42:29	51.6243	0.665494	51.8954
remora	short	100	reference	1	2025-08-08 07:42:29	17.8452	0.417538	17.7048
f5c	long	100000	query	24	2025-10-16 12:01:49	3600.03	23.2479	3598.22
f5c	long	100000	query	16	2025-09-01 09:16:49	3964.91	11.9652	3960.57
f5c	long	100000	query	8	2025-09-01 09:16:49	6147.76	52.5112	6167.89
f5c	long	100000	query	1
f5c	long	100000	reference	24	2025-10-16 12:01:49	18771	915.998	18242.5
f5c	long	100000	reference	16	2025-10-27 09:05:19	19871.1	14.0667	19874.3
f5c	long	100000	reference	8	2025-10-27 09:05:19	29239.3	130.342	29185.8
f5c	long	100000	reference	1
f5c	long	10000	query	24	2025-08-18 09:18:13	355.106	5.09177	356.488
f5c	long	10000	query	16	2025-08-18 09:18:13	400.621	3.42584	402.368
f5c	long	10000	query	8	2025-08-18 09:18:13	614.915	29.6954	625.535
f5c	long	10000	query	1	2025-08-18 09:18:13	3081.66	0.759545	3081.52
f5c	long	10000	reference	24	2025-08-27 07:28:46	1783.72	21.8185	1788.64
f5c	long	10000	reference	16	2025-08-27 07:28:46	1892.53	11.8549	1892.34
f5c	long	10000	reference	8	2025-08-27 07:28:46	2788.81	14.8966	2786.97
f5c	long	10000	reference	1	2025-08-29 07:03:28	16113.9	4.6417	16111.9
f5c	long	1000	query	24	2025-08-18 09:18:13	34.9389	0.325864	34.7695
f5c	long	1000	query	16	2025-08-18 09:18:13	37.1035	0.359078	37.1216
f5c	long	1000	query	8	2025-08-18 09:18:13	58.9776	1.11813	59.2093
f5c	long	1000	query	1	2025-08-18 09:18:13	287.581	0.27767	287.505
f5c	long	1000	reference	24	2025-08-18 09:18:13	144.991	2.02302	144.766
f5c	long	1000	reference	16	2025-08-18 09:18:13	153.791	2.44284	152.627
f5c	long	1000	reference	8	2025-08-18 09:18:13	236.205	4.93694	238.915
f5c	long	1000	reference	1	2025-08-18 09:18:13	1454.83	0.373096	1454.72
f5c	long	100	query	24	2025-08-18 09:18:13	3.89082	0.0944437	3.93818
f5c	long	100	query	16	2025-08-18 09:18:13	4.20594	0.150743	4.18568
f5c	long	100	query	8	2025-08-18 09:18:13	6.2478	0.110416	6.2118
f5c	long	100	query	1	2025-08-18 09:18:13	28.4597	0.0621435	28.4694
f5c	long	100	reference	24	2025-08-18 09:18:13	13.604	0.404157	13.5302
f5c	long	100	reference	16	2025-08-18 09:18:13	15.3064	0.214657	15.3364
f5c	long	100	reference	8	2025-08-18 09:18:13	25.5362	1.14978	25.5473
f5c	long	100	reference	1	2025-08-18 09:18:13	139.027	0.234305	138.975
f5c	medium	100000	query	24	2025-09-01 09:16:49	1310.34	3.56357	1308.55
f5c	medium	100000	query	16	2025-09-01 09:16:49	1469.37	10.9297	1464.87
f5c	medium	100000	query	8	2025-09-01 09:16:49	2334.61	72.0233	2372.08
f5c	medium	100000	query	1
f5c	medium	100000	reference	24	2025-09-01 09:16:49	7675.26	27.1218	7666.11
f5c	medium	100000	reference	16	2025-09-01 09:16:49	8194.78	36.8979	8202.99
f5c	medium	100000	reference	8	2025-09-01 09:16:49	12334.8	153.274	12263
f5c	medium	100000	reference	1
f5c	medium	10000	query	24	2025-08-15 12:48:29	133.03	0.703778	133.006
f5c	medium	10000	query	16	2025-08-15 12:48:29	149.921	0.868485	150.214
f5c	medium	10000	query	8	2025-08-15 12:48:29	236.751	4.01343	236.408
f5c	medium	10000	query	1	2025-08-15 12:48:29	1194.78	2.18783	1193.86
f5c	medium	10000	reference	24	2025-08-15 12:48:29	784.204	7.46316	779.569
f5c	medium	10000	reference	16	2025-08-15 12:48:29	830.717	6.92566	830.247
f5c	medium	10000	reference	8	2025-08-15 12:48:29	1266.15	12.6639	1264.84
f5c	medium	10000	reference	1	2025-08-15 12:48:29	7179.07	1.4535	7178.8
f5c	medium	1000	query	24	2025-08-15 12:48:29	14.3388	0.0994519	14.3537
f5c	medium	1000	query	16	2025-08-15 12:48:29	16.1141	0.256134	16.0914
f5c	medium	1000	query	8	2025-08-15 12:48:29	24.7963	0.341604	24.9523
f5c	medium	1000	query	1	2025-08-15 12:48:29	118.752	0.18946	118.815
f5c	medium	1000	reference	24	2025-08-15 12:48:29	131.244	4.65408	129.77
f5c	medium	1000	reference	16	2025-08-15 12:48:29	134.518	2.2452	135.716
f5c	medium	1000	reference	8	2025-08-15 12:48:29	152.218	7.9259	156.462
f5c	medium	1000	reference	1	2025-08-15 12:48:29	738.456	0.204125	738.414
f5c	medium	100	query	24	2025-08-15 12:48:29	2.07011	0.0284123	2.06816
f5c	medium	100	query	16	2025-08-15 12:48:29	2.25509	0.107229	2.27816
f5c	medium	100	query	8	2025-08-15 12:48:29	3.11344	0.054175	3.11915
f5c	medium	100	query	1	2025-08-15 12:48:29	13.173	0.065164	13.159
f5c	medium	100	reference	24	2025-08-15 12:48:29	7.17899	0.291572	7.14384
f5c	medium	100	reference	16	2025-08-15 12:48:29	8.4785	0.394337	8.63782
f5c	medium	100	reference	8	2025-08-15 12:48:29	14.2623	0.873489	14.1226
f5c	medium	100	reference	1	2025-08-15 12:48:29	71.8278	0.0429952	71.8175
f5c	short	100000	query	24	2025-09-01 09:16:49	303.305	1.90238	303.092
f5c	short	100000	query	16	2025-09-01 09:16:49	324.845	0.132939	324.815
f5c	short	100000	query	8	2025-09-01 09:16:49	485.87	0.66141	486.098
f5c	short	100000	query	1
f5c	short	100000	reference	24	2025-09-01 09:16:49	1430.44	4.92434	1431.16
f5c	short	100000	reference	16	2025-09-01 09:16:49	1488.68	7.75336	1490.19
f5c	short	100000	reference	8	2025-09-01 09:16:49	2395.89	30.9435	2405.64
f5c	short	100000	reference	1
f5c	short	10000	query	24	2025-08-08 07:42:29	14.4517	0.11535	14.4685
f5c	short	10000	query	16	2025-08-08 07:42:29	16.6057	0.274197	16.6894
f5c	short	10000	query	8	2025-08-08 07:42:29	27.4961	1.65273	28.3607
f5c	short	10000	query	1	2025-08-08 07:42:29	151.492	0.0561962	151.491
f5c	short	10000	reference	24	2025-08-08 07:42:29	215.877	1.33639	216.295
f5c	short	10000	reference	16	2025-08-08 07:42:29	234.305	1.47794	233.643
f5c	short	10000	reference	8	2025-08-08 07:42:29	331.2	7.34986	329.537
f5c	short	10000	reference	1	2025-08-08 07:42:29	1925.47	9.13323	1923.49
f5c	short	1000	query	24	2025-08-08 07:42:29	1.96979	0.0407587	1.98074
f5c	short	1000	query	16	2025-08-08 07:42:29	2.21957	0.0484071	2.20578
f5c	short	1000	query	8	2025-08-08 07:42:29	3.2261	0.0282798	3.23555
f5c	short	1000	query	1	2025-08-08 07:42:29	15.9138	0.0411377	15.933
f5c	short	1000	reference	24	2025-08-08 07:42:29	23.343	0.468607	23.2587
f5c	short	1000	reference	16	2025-08-08 07:42:29	25.4799	0.794515	24.9358
f5c	short	1000	reference	8	2025-08-08 07:42:29	34.3884	0.393583	34.379
f5c	short	1000	reference	1	2025-08-08 07:42:29	181.32	0.0339757	181.318
f5c	short	100	query	24	2025-08-08 07:42:29	0.690623	0.0604627	0.66628
f5c	short	100	query	16	2025-08-08 07:42:29	0.688005	0.0361937	0.683273
f5c	short	100	query	8	2025-08-08 07:42:29	0.694177	0.0176902	0.696258
f5c	short	100	query	1	2025-08-08 07:42:29	1.60028	0.0328997	1.58998
f5c	short	100	reference	24	2025-08-08 07:42:29	1.19641	0.180149	1.11799
f5c	short	100	reference	16	2025-08-08 07:42:29	1.31195	0.113783	1.34048
f5c	short	100	reference	8	2025-08-08 07:42:29	1.58489	0.0172614	1.57979
f5c	short	100	reference	1	2025-08-08 07:42:29	6.43114	0.00779472	6.43011
uncalled4	long	100000	query	24	2025-10-16 12:01:49	9019.27	86.5115	9028.87
uncalled4	long	100000	query	16	2025-09-01 09:16:49	10769.8	683.554	10428.2
uncalled4	long	100000	query	8	2025-09-01 09:16:49	21973.4	134.27	21922.4
uncalled4	long	100000	query	1
uncalled4	long	100000	reference	24	2025-10-16 12:01:49	8497.41	31.267	8494.81
uncalled4	long	100000	reference	16	2025-10-27 09:05:19	9938.63	306.708	9848.05
uncalled4	long	100000	reference	8	2025-10-27 09:05:19	17072.3	949.962	17192
uncalled4	long	100000	reference	1
uncalled4	long	10000	query	24	2025-08-18 09:18:13	1243.72	99.1625	1202.22
uncalled4	long	10000	query	16	2025-08-18 09:18:13	1327.29	31.0768	1316.79
uncalled4	long	10000	query	8	2025-08-18 09:18:13	1886.02	37.5548	1862.97
uncalled4	long	10000	query	1	2025-08-18 09:18:13	11660.7	32.2558	11657.8
uncalled4	long	10000	reference	24	2025-08-27 07:28:46	1199.56	72.2503	1203.06
uncalled4	long	10000	reference	16	2025-08-27 07:28:46	1272.39	25.814	1258.22
uncalled4	long	10000	reference	8	2025-08-27 07:28:46	1796.33	27.3757	1790.49
uncalled4	long	10000	reference	1	2025-08-18 09:18:13	11077.3	25.3056	11069
uncalled4	long	1000	query	24	2025-08-18 09:18:13	534.489	6.14323	538.477
uncalled4	long	1000	query	16	2025-08-18 09:18:13	538.926	3.23454	539.74
uncalled4	long	1000	query	8	2025-08-18 09:18:13	538.947	5.2814	540.644
uncalled4	long	1000	query	1	2025-08-18 09:18:13	1016.79	1.78532	1016.17
uncalled4	long	1000	reference	24	2025-08-18 09:18:13	508.237	6.38386	505.844
uncalled4	long	1000	reference	16	2025-08-18 09:18:13	511.023	5.09284	513.682
uncalled4	long	1000	reference	8	2025-08-18 09:18:13	510.921	6.66561	513.556
uncalled4	long	1000	reference	1	2025-08-18 09:18:13	971.136	2.44726	970.391
uncalled4	long	100	query	24	2025-08-18 09:18:13	103.104	0.68996	102.867
uncalled4	long	100	query	16	2025-08-18 09:18:13	102.648	0.868018	102.174
uncalled4	long	100	query	8	2025-08-18 09:18:13	101.712	0.403469	101.8
uncalled4	long	100	query	1	2025-08-18 09:18:13	100.019	1.72218	99.7957
uncalled4	long	100	reference	24	2025-08-18 09:18:13	97.2716	0.424268	97.4357
uncalled4	long	100	reference	16	2025-08-18 09:18:13	96.7622	0.66985	96.5846
uncalled4	long	100	reference	8	2025-08-18 09:18:13	96.6191	0.374592	96.72
uncalled4	long	100	reference	1	2025-08-18 09:18:13	93.9732	0.609391	94.2248
uncalled4	medium	100000	query	24	2025-09-01 09:16:49	2626.4	48.4695	2609.06
uncalled4	medium	100000	query	16	2025-09-01 09:16:49	3063.89	43.6774	3072.23
uncalled4	medium	100000	query	8	2025-09-01 09:16:49	5462.66	273.468	5500.09
uncalled4	medium	100000	query	1
uncalled4	medium	100000	reference	24	2025-09-01 09:16:49	2502.51	24.2182	2492.59
uncalled4	medium	100000	reference	16	2025-09-01 09:16:49	2992.98	30.3665	2981.21
uncalled4	medium	100000	reference	8	2025-09-01 09:16:49	5354.39	312.673	5240.81
uncalled4	medium	100000	reference	1
uncalled4	medium	10000	query	24	2025-08-15 12:48:29	334.689	19.5157	322.862
uncalled4	medium	10000	query	16	2025-08-15 12:48:29	415.159	1.266	415.093
uncalled4	medium	10000	query	8	2025-08-15 12:48:29	578.861	8.6569	575.554
uncalled4	medium	10000	query	1	2025-08-15 12:48:29	3421.78	6.69747	3420.99
uncalled4	medium	10000	reference	24	2025-08-15 12:48:29	309.774	8.65077	306.961
uncalled4	medium	10000	reference	16	2025-08-15 12:48:29	401.22	2.11936	401.801
uncalled4	medium	10000	reference	8	2025-08-15 12:48:29	563.021	11.3775	554.993
uncalled4	medium	10000	reference	1	2025-08-15 12:48:29	3331.03	14.4763	3331.71
uncalled4	medium	1000	query	24	2025-08-15 12:48:29	184.601	2.56633	186.088
uncalled4	medium	1000	query	16	2025-08-15 12:48:29	185.163	1.34324	185.653
uncalled4	medium	1000	query	8	2025-08-15 12:48:29	185.221	1.72576	185.754
uncalled4	medium	1000	query	1	2025-08-15 12:48:29	339.049	0.952476	339.264
uncalled4	medium	1000	reference	24	2025-08-15 12:48:29	177.267	2.6016	178.765
uncalled4	medium	1000	reference	16	2025-08-15 12:48:29	176.293	2.24407	177.329
uncalled4	medium	1000	reference	8	2025-08-15 12:48:29	177.519	1.44364	178.197
uncalled4	medium	1000	reference	1	2025-08-15 12:48:29	328.213	1.20965	327.692
uncalled4	medium	100	query	24	2025-08-15 12:48:29	41.7127	0.316592	41.7952
uncalled4	medium	100	query	16	2025-08-15 12:48:29	41.3402	0.256597	41.2457
uncalled4	medium	100	query	8	2025-08-15 12:48:29	41.2415	0.287767	41.4118
uncalled4	medium	100	query	1	2025-08-15 12:48:29	38.7279	0.29449	38.7294
uncalled4	medium	100	reference	24	2025-08-15 12:48:29	40.6709	0.334696	40.4783
uncalled4	medium	100	reference	16	2025-08-15 12:48:29	40.7378	1.26723	40.4082
uncalled4	medium	100	reference	8	2025-08-15 12:48:29	39.9256	0.428141	39.9008
uncalled4	medium	100	reference	1	2025-08-15 12:48:29	37.5824	0.311579	37.424
uncalled4	short	100000	query	24	2025-09-01 09:16:49	570.466	2.0265	569.68
uncalled4	short	100000	query	16	2025-09-01 09:16:49	678.63	9.42472	681.23
uncalled4	short	100000	query	8	2025-09-01 09:16:49	1249.87	36.9162	1231.88
uncalled4	short	100000	query	1
uncalled4	short	100000	reference	24	2025-09-01 09:16:49	575.36	1.88879	574.729
uncalled4	short	100000	reference	16	2025-09-01 09:16:49	683.591	0.875798	683.762
uncalled4	short	100000	reference	8	2025-09-01 09:16:49	1230.4	20.8958	1233.33
uncalled4	short	100000	reference	1
uncalled4	short	10000	query	24	2025-08-26 06:20:37	74.6897	1.37244	74.781
uncalled4	short	10000	query	16	2025-08-26 06:20:37	94.8391	3.82514	96.6281
uncalled4	short	10000	query	8	2025-08-26 06:20:37	133.206	4.30333	134.084
uncalled4	short	10000	query	1	2025-08-26 06:20:37	720.907	2.93649	721.846
uncalled4	short	10000	reference	24	2025-08-08 07:42:29	101.168	3.04615	101.416
uncalled4	short	10000	reference	16	2025-08-08 07:42:29	122.212	0.863096	122.272
uncalled4	short	10000	reference	8	2025-08-08 07:42:29	171.589	1.44312	172.174
uncalled4	short	10000	reference	1	2025-08-08 07:42:29	977.605	2.30953	976.952
uncalled4	short	1000	query	24	2025-08-26 06:20:37	46.9352	0.455485	46.9419
uncalled4	short	1000	query	16	2025-08-26 06:20:37	46.6758	0.227437	46.6393
uncalled4	short	1000	query	8	2025-08-26 06:20:37	46.2134	0.831457	46.6083
uncalled4	short	1000	query	1	2025-08-26 06:20:37	80.9667	0.358428	81.1129
uncalled4	short	1000	reference	24	2025-08-08 07:42:29	56.7461	1.09782	57.0925
uncalled4	short	1000	reference	16	2025-08-08 07:42:29	56.563	0.613795	56.7886
uncalled4	short	1000	reference	8	2025-08-08 07:42:29	55.9411	0.783625	56.1852
uncalled4	short	1000	reference	1	2025-08-08 07:42:29	93.2448	0.747202	93.1245
uncalled4	short	100	query	24	2025-08-26 06:20:37	12.0393	0.179257	11.9825
uncalled4	short	100	query	16	2025-08-26 06:20:37	11.6036	0.0824455	11.5808
uncalled4	short	100	query	8	2025-08-26 06:20:37	11.2072	0.0713282	11.2018
uncalled4	short	100	query	1	2025-08-26 06:20:37	9.48116	0.0851738	9.50807
uncalled4	short	100	reference	24	2025-08-08 07:42:29	13.4584	0.197636	13.3936
uncalled4	short	100	reference	16	2025-08-08 07:42:29	13.0174	0.203455	12.9433
uncalled4	short	100	reference	8	2025-08-08 07:42:29	12.6534	0.248444	12.5479
uncalled4	short	100	reference	1	2025-08-08 07:42:29	10.8458	0.0328425	10.8443

## Sheet: Best time only
tool	read_len	n_reads	alignment_type	n_threads	date	mean_time
fishnet	long	100000	query	24	2025-11-13 16:43:51	1858.33
fishnet	long	100000	reference	24	2025-11-13 18:47:54	1951.73
fishnet	long	10000	query	24	2025-11-13 20:58:10	190.258
fishnet	long	10000	reference	24	2025-11-13 21:10:55	196.979
fishnet	long	1000	query	24	2025-11-13 21:24:06	20.1795
fishnet	long	1000	reference	24	2025-11-13 21:25:28	21.6184
fishnet	long	100	query	24	2025-11-13 21:26:56	2.71309
fishnet	long	100	reference	24	2025-11-13 21:27:08	2.82661
fishnet	medium	100000	query	24	2025-11-13 21:27:20	895.73
fishnet	medium	100000	reference	24	2025-11-13 22:27:05	940.578
fishnet	medium	10000	query	24	2025-11-13 23:29:53	91.9487
fishnet	medium	10000	reference	24	2025-11-13 23:36:03	98.2301
fishnet	medium	1000	query	24	2025-11-13 23:42:37	10.4624
fishnet	medium	1000	reference	24	2025-11-13 23:43:20	10.9115
fishnet	medium	100	query	24	2025-11-13 23:44:05	1.6876
fishnet	medium	100	reference	16	2025-11-13 15:43:52	1.98986
fishnet	short	100000	query	24	2025-11-13 23:44:22	344.189
fishnet	short	100000	reference	24	2025-11-14 00:07:20	344.643
fishnet	short	10000	query	24	2025-11-14 00:30:21	33.349
fishnet	short	10000	reference	24	2025-11-14 00:32:36	33.9805
fishnet	short	1000	query	24	2025-11-14 00:34:53	4.40096
fishnet	short	1000	reference	24	2025-11-14 00:35:12	4.38017
fishnet	short	100	query	24	2025-11-14 00:35:30	0.842207
fishnet	short	100	reference	24	2025-11-14 00:35:35	0.860208
remora	long	100000	query	1	2025-11-03 16:30:00	60634.6
remora	long	100000	reference	1	2025-09-08 15:49:34	60419.4
remora	long	10000	query	1	2025-08-28 19:50:00	5410.83
remora	long	10000	reference	1	2025-08-27 07:28:46	5362.54
remora	long	1000	query	1	2025-08-28 19:50:00	525.302
remora	long	1000	reference	1	2025-08-28 19:50:00	513.531
remora	long	100	query	1	2025-08-28 19:50:00	58.386
remora	long	100	reference	1	2025-08-28 19:50:00	56.1326
remora	medium	100000	query	1	2025-11-03 16:30:00	25177.3
remora	medium	100000	reference	1	2025-11-10 09:14:13	25068
remora	medium	10000	query	1	2025-08-25 10:46:38	2494.27
remora	medium	10000	reference	1	2025-08-25 10:46:38	2495.36
remora	medium	1000	query	1	2025-08-25 10:46:38	253.45
remora	medium	1000	reference	1	2025-08-25 10:46:38	262.755
remora	medium	100	query	1	2025-08-25 10:46:38	35.163
remora	medium	100	reference	1	2025-08-25 10:46:38	35.127
remora	short	100000	query	1	2025-11-03 16:30:00	8201.79
remora	short	100000	reference	1	2025-11-10 09:14:13	7971.9
remora	short	10000	query	1	2025-08-26 06:20:37	958.379
remora	short	10000	reference	1	2025-08-08 07:42:29	879.034
remora	short	1000	query	1	2025-08-08 07:42:29	114.346
remora	short	1000	reference	1	2025-08-08 07:42:29	98.9436
remora	short	100	query	1	2025-08-08 07:42:29	51.6243
remora	short	100	reference	1	2025-08-08 07:42:29	17.8452
f5c	long	100000	query	24	2025-10-16 12:01:49	3600.03
f5c	long	100000	reference	24	2025-10-16 12:01:49	18771
f5c	long	10000	query	24	2025-08-18 09:18:13	355.106
f5c	long	10000	reference	24	2025-08-27 07:28:46	1783.72
f5c	long	1000	query	24	2025-08-18 09:18:13	34.9389
f5c	long	1000	reference	24	2025-08-18 09:18:13	144.991
f5c	long	100	query	24	2025-08-18 09:18:13	3.89082
f5c	long	100	reference	24	2025-08-18 09:18:13	13.604
f5c	medium	100000	query	24	2025-09-01 09:16:49	1310.34
f5c	medium	100000	reference	24	2025-09-01 09:16:49	7675.26
f5c	medium	10000	query	24	2025-08-15 12:48:29	133.03
f5c	medium	10000	reference	24	2025-08-15 12:48:29	784.204
f5c	medium	1000	query	24	2025-08-15 12:48:29	14.3388
f5c	medium	1000	reference	24	2025-08-15 12:48:29	131.244
f5c	medium	100	query	24	2025-08-15 12:48:29	2.07011
f5c	medium	100	reference	24	2025-08-15 12:48:29	7.17899
f5c	short	100000	query	24	2025-09-01 09:16:49	303.305
f5c	short	100000	reference	24	2025-09-01 09:16:49	1430.44
f5c	short	10000	query	24	2025-08-08 07:42:29	14.4517
f5c	short	10000	reference	24	2025-08-08 07:42:29	215.877
f5c	short	1000	query	24	2025-08-08 07:42:29	1.96979
f5c	short	1000	reference	24	2025-08-08 07:42:29	23.343
f5c	short	100	query	16	2025-08-08 07:42:29	0.688005
f5c	short	100	reference	24	2025-08-08 07:42:29	1.19641
uncalled4	long	100000	query	24	2025-10-16 12:01:49	9019.27
uncalled4	long	100000	reference	24	2025-10-16 12:01:49	8497.41
uncalled4	long	10000	query	24	2025-08-18 09:18:13	1243.72
uncalled4	long	10000	reference	24	2025-08-27 07:28:46	1199.56
uncalled4	long	1000	query	24	2025-08-18 09:18:13	534.489
uncalled4	long	1000	reference	24	2025-08-18 09:18:13	508.237
uncalled4	long	100	query	1	2025-08-18 09:18:13	100.019
uncalled4	long	100	reference	1	2025-08-18 09:18:13	93.9732
uncalled4	medium	100000	query	24	2025-09-01 09:16:49	2626.4
uncalled4	medium	100000	reference	24	2025-09-01 09:16:49	2502.51
uncalled4	medium	10000	query	24	2025-08-15 12:48:29	334.689
uncalled4	medium	10000	reference	24	2025-08-15 12:48:29	309.774
uncalled4	medium	1000	query	24	2025-08-15 12:48:29	184.601
uncalled4	medium	1000	reference	16	2025-08-15 12:48:29	176.293
uncalled4	medium	100	query	1	2025-08-15 12:48:29	38.7279
uncalled4	medium	100	reference	1	2025-08-15 12:48:29	37.5824
uncalled4	short	100000	query	24	2025-09-01 09:16:49	570.466
uncalled4	short	100000	reference	24	2025-09-01 09:16:49	575.36
uncalled4	short	10000	query	24	2025-08-26 06:20:37	74.6897
uncalled4	short	10000	reference	24	2025-08-08 07:42:29	101.168
uncalled4	short	1000	query	8	2025-08-26 06:20:37	46.2134
uncalled4	short	1000	reference	8	2025-08-08 07:42:29	55.9411
uncalled4	short	100	query	1	2025-08-26 06:20:37	9.48116
uncalled4	short	100	reference	1	2025-08-08 07:42:29	10.8458

## Sheet: Derived statistics
read_len	n_reads	alignment_type	tool	factor_x_speedup	percent_change
long	100	query	remora	21.5201	2052.01
long	100	query	f5c	1.43409	43.409
long	100	query	uncalled4	36.8653	3586.53
long	100	reference	remora	19.8586	1885.86
long	100	reference	f5c	4.81284	381.284
long	100	reference	uncalled4	33.2459	3224.59
long	1000	query	remora	26.0315	2503.15
long	1000	query	f5c	1.73141	73.1406
long	1000	query	uncalled4	26.4868	2548.68
long	1000	reference	remora	23.7543	2275.43
long	1000	reference	f5c	6.70683	570.683
long	1000	reference	uncalled4	23.5094	2250.94
long	10000	query	remora	28.4395	2743.95
long	10000	query	f5c	1.86645	86.6449
long	10000	query	uncalled4	6.53702	553.702
long	10000	reference	remora	27.2239	2622.39
long	10000	reference	f5c	9.05536	805.536
long	10000	reference	uncalled4	6.08979	508.979
long	100000	query	remora	32.6286	3162.86
long	100000	query	f5c	1.93724	93.7241
long	100000	query	uncalled4	4.85343	385.343
long	100000	reference	remora	30.9568	2995.68
long	100000	reference	f5c	9.61764	861.764
long	100000	reference	uncalled4	4.35378	335.378
medium	100	query	remora	20.8361	1983.61
medium	100	query	f5c	1.22666	22.666
medium	100	query	uncalled4	22.9485	2194.85
medium	100	reference	remora	17.653	1665.3
medium	100	reference	f5c	3.60779	260.779
medium	100	reference	uncalled4	18.887	1788.7
medium	1000	query	remora	24.2249	2322.49
medium	1000	query	f5c	1.37051	37.0509
medium	1000	query	uncalled4	17.6443	1664.43
medium	1000	reference	remora	24.0805	2308.05
medium	1000	reference	f5c	12.028	1102.8
medium	1000	reference	uncalled4	16.1565	1515.65
medium	10000	query	remora	27.1268	2612.68
medium	10000	query	f5c	1.44678	44.6781
medium	10000	query	uncalled4	3.63995	263.995
medium	10000	reference	remora	25.4032	2440.32
medium	10000	reference	f5c	7.98334	698.334
medium	10000	reference	uncalled4	3.15356	215.356
medium	100000	query	remora	28.1082	2710.82
medium	100000	query	f5c	1.46287	46.287
medium	100000	query	uncalled4	2.93214	193.214
medium	100000	reference	remora	26.6518	2565.18
medium	100000	reference	f5c	8.16015	716.015
medium	100000	reference	uncalled4	2.66061	166.061
short	100	query	remora	61.2964	6029.64
short	100	query	f5c	-1.22413	-18.3093
short	100	query	uncalled4	11.2575	1025.75
short	100	reference	remora	20.7452	1974.52
short	100	reference	f5c	1.39084	39.0836
short	100	reference	uncalled4	12.6084	1160.84
short	1000	query	remora	25.982	2498.2
short	1000	query	f5c	-2.23423	-55.2418
short	1000	query	uncalled4	10.5007	950.075
short	1000	reference	remora	22.589	2158.9
short	1000	reference	f5c	5.32924	432.924
short	1000	reference	uncalled4	12.7715	1177.15
short	10000	query	remora	28.7379	2773.79
short	10000	query	f5c	-2.30762	-56.6653
short	10000	query	uncalled4	2.23964	123.964
short	10000	reference	remora	25.8688	2486.88
short	10000	reference	f5c	6.35298	535.298
short	10000	reference	uncalled4	2.97724	197.724
short	100000	query	remora	23.8293	2282.93
short	100000	query	f5c	-1.13479	-11.8783
short	100000	query	uncalled4	1.65742	65.742
short	100000	reference	remora	23.1309	2213.09
short	100000	reference	f5c	4.15048	315.048
short	100000	reference	uncalled4	1.66944	66.9436
